# Supplementary material for: Whole-genome epigenetic function annotation through sgRNA libraries synthesized by controlled template-dependent elongation
Source: Research Square preprint supplement (doi:10.21203/rs.3.rs-100657/v1), 2020-11-05
Supplement: Supplementary file 1 [file TableS1.xlsx]

## Sheet: Simulated dataset
sgRNA sequence	P1.count	P10.count
AAAAAACAGGCTAGGCGCGG	0	4
AAAAAAGGGAGTAGAAGCTT	4	0
AAAAAAGGGTATAATAGTG	6	0
AAAAACACCAGCTGCGAACC	168	219
AAAAAGGCAGCTGGGCCCAG	21	0
AAAAATAACGGATGCTGGCG	0	4
AAAACACACACCAGGCTGC	0	4
AAAACACCGCAGTGCATTCC	4	0
AAAACACTCAGCACGTTGCC	3	4
AAAACAGTCGTGGCGAGAGG	0	8
AAAACATCGTCTGCGTGGGG	4	0
AAAACATTGAAGGGTGACCT	7	0
AAAACCGACAGATGCTGGCC	6	5
AAAACCTCCTGGGCTGCTGGA	6	0
AAAACGCAGAAAGGAGGGTG	0	26
AAAACGCTCGGGCCAAGGAG	6	0
AAAACGGCAGCTTCCTGTTCC	0	5
AAAACTCGCAGGCAGGACGC	12	9
AAAACTGGATTGGGAAAAGA	10	0
AAAAGAACTGAGGTGGCCGC	4	3
AAAAGAACTGAGGTGGCCGG	17	3
AAAAGAACTGAGGTGGCCGT	914	994
AAAAGACCGAGTCAGCGGAAG	4	0
AAAAGAGAAGCGTCTATGGC	0	4
AAAAGAGCAAAAAGGGAGT	7	3
AAAAGAGCTGAGGTGGCCGT	4	0
AAAAGAGGAGTGGGAACTG	0	4
AAAAGCCAGCCAGTGAGAGC	150	71
AAAAGCTTCTGCGCAGAGCC	0	6
AAAAGGACTAGGCAAGGTGC	2	8
AAAAGGACTAGGTGGGACA	0	6
AAAAGGAGGAGGTGGAGGGT	21	0
AAAAGGATGAAGTGAGCTCA	1	4
AAAAGGGCGGCCTGGGCCCG	4	6
AAAAGGGCGGCCTGGGCCGG	6	0
AAAAGGGCGGCCTGGGCCTG	901	1113
AAAAGGGCGGTTTGCGCAAG	1	8
AAAATCTGGAGCACGGAGAGG	5	0
AAAATGCGCAAGGCACTGGC	0	4
AAAATGGCACCGAGGACCTG	9	1
AAAATGTGTGCAGGACCTGT	6	0
AAACAAGCAGAGGCTGAGGTG	0	6
AAACAAGCCTGGGCAATGGC	4	0
AAACAAGTGCTGCCTGACAC	7	0
AAACAAGTGGCATAAAGCAG	0	4
AAACACACAGGCTGCGGCAA	2	4
AAACACCAGGAGGCGCCCGC	4	4
AAACACCGAGACCGAGGTCA	0	4
AAACACCTAGTCCGTGGCCC	6	20
AAACACCTGCTTCCAAACAG	131	80
AAACACGAGCGTTGAGACTGG	8	3
AAACACGTCACGCCCAGCGA	10	7
AAACACGTGACACGCCTTGA	5	1
AAACACGTGGCACGCCTTGA	193	248
AAACACTACACGTGGGCCCC	128	100
AAACACTCTTCAAGCTTGGCG	0	4
AAACACTGGAATGGTGGAG	2	4
AAACACTTGGACACAGGGCG	3	8
AAACACTTGGCTGGGCGCGGT	0	5
AAACAGCACATGGAAGGCCA	4	2
AAACAGCAGTGCCCTGGGCG	4	13
AAACAGCCTGAGGCACTGTG	1	6
AAACAGGCTCAGGCGGTCGG	7	1
AAACAGGTAACGGAGGGCAC	1	5
AAACAGTCGCACCAATGGCA	89	23
AAACATCTTGCGCAGACCCT	0	7
AAACATGGACAAGGTAGTGGC	3	7
AAACCACGCAGCACGGTAGT	6	2
AAACCACGCAGCACGTTAGC	10	2
AAACCACGCAGCACGTTAGT	855	750
AAACCACTGCACTCCAGCCT	5	0
AAACCATTTGAATGAGAGGA	5	0
AAACCCAGGATGTGTCTGGT	5	2
AAACCCCACTCAAGGGCGCG	2	5
AAACCCCAGGAGGACGCTGC	8	2
AAACCCTAACCCTGTGTGGC	0	10
AAACCCTGCAAGCTTGCCTG	1	7
AAACCGCACCGCACGGATGC	2	5
AAACCGCCCAGCCCCGGAGC	3	6
AAACCGGCGCCTCGGAGGCTG	5	0
AAACCGTCGAGTGAGACGG	7	6
AAACCTGCAGCCAGGTGTGG	4	2
AAACCTGGTGCTCATTGTGT	0	4
AAACGAACACAATGGCGCCG	162	155
AAACGAACAGCCCGGTGTCT	12	1
AAACGCGCTGTGCGAGCAGC	136	113
AAACGCTACCCGCCAGCCTG	127	13
AAACGGACGGACGACGGAGG	0	12
AAACGGAGGCCCAAGGGGGC	4	1
AAACGGAGGCCCAAGGGGTC	144	123
AAACGGTATGGGGAAGAGG	4	6
AAACGTGAGGACTGACTGCC	0	7
AAACGTTGCAACGTGTCACC	7	15
AAACTACGCGGACCACGTCA	11	0
AAACTAGGCACCAACTCCGT	6	2
AAACTCCCTGCCACACGGCT	4	9
AAACTGATCCTTTTGGGCGG	0	5
AAACTGCGCGGTCGAGGGCC	201	68
AAACTGCTGACCTCGTATG	4	7
AAACTGGCGCCTGCTTGTCA	0	12
AAACTGGGGAGCATAAGGCC	5	2
AAACTGGTGACGGCGGGGCA	2	5
AAACTTCCTCGTCGGGCCGC	4	6
AAACTTGCGTGAGGAGGAGG	8	0
AAAGAAAAGGGAAGATGGGC	5	3
AAAGAACACGGCTTAGTGGC	6	6
AAAGAACAGGCCAGTTGCA	0	7
AAAGAACCCTCTTCCCGCAT	6	1
AAAGAACCCTCTTCCTGCAC	7	1
AAAGAACCCTCTTCCTGCAT	595	415
AAAGAACCCTCTTCCTGCCT	8	0
AAAGAACGAAGCAGATGGAC	0	4
AAAGAACTCGTCCCCGTGCTG	7	6
AAAGAACTGCGCCGAGCATG	6	0
AAAGAACTGGCCAGAGCCGT	6	3
AAAGAACTTGCGTGTGCTGG	5	8
AAAGAAGGAGGGTGAGCACC	4	0
AAAGAATCTGCGTGGAGATG	8	0
AAAGAATGCGTGTGAAGCTC	0	4
AAAGAATGCTGGTGAGGACC	4	2
AAAGACGCCAGCTGCAGGGG	4	2
AAAGACGTGGCTGGGCTGCA	4	0
AAAGACTGGACATGTTGGCTG	17	14
AAAGAGAGGCTGCAGCCCAG	8	0
AAAGAGCATGATATCAGCCC	0	12
AAAGAGGCCAACTGTGCCAG	697	630
AAAGAGGCCGACTGTGCCAG	4	1
AAAGAGGCTCATGTTTGGCC	0	9
AAAGAGGGATGTGAGGTGA	5	2
AAAGAGGGCTGTGAGGTGA	8	1
AAAGAGGGGTGTGAGGTGA	9	4
AAAGAGGGTGGTGAGGTGA	0	4
AAAGAGGGTTGCGAGGTGA	9	1
AAAGAGGGTTGGGAGGTGA	5	1
AAAGAGGGTTGTGAGGTG	5	0
AAAGAGGGTTGTGAGGTGA	886	981
AAAGAGGGTTGTGAGGTGC	6	2
AAAGAGGGTTGTGAGGTGG	6	2
AAAGAGGTGCGTGCGTGCGG	8	8
AAAGAGTCCGGCAATGGCC	0	5
AAAGAGTCGGTTGCTGAGCC	22	14
AAAGAGTGAAGGTGGCTAC	20	4
AAAGATCTGGCTGGGCATGGT	4	5
AAAGATGGCCTGAACTAAGG	0	11
AAAGCAACATCAGTCTGGGC	5	2
AAAGCAAGCCGCCTGAGAGG	4	0
AAAGCAAGCTGCCCGAGAGG	4	0
AAAGCAAGCTGCCTGAGAGG	856	486
AAAGCAAGCTGCCTGAGCGG	4	0
AAAGCAAGCTGCCTGAGGGG	5	4
AAAGCACACACCACCATCTGG	2	5
AAAGCACAGGGCAAGGCGTGT	13	10
AAAGCACCCAGGCATGACCA	5	0
AAAGCACGCGAGTTTGGAGC	674	323
AAAGCACGCGAGTTTGGCGC	4	0
AAAGCACGCGAGTTTGGGGC	6	0
AAAGCACGCGCCTGTGCTGG	10	0
AAAGCAGCCATGGCTGTGTT	13	20
AAAGCAGCGCAGGGCAGAGC	0	7
AAAGCAGGCTGCCTGAGAGG	4	0
AAAGCAGGTAGGCAGGCG	0	8
AAAGCATGGAAGAGGAGGAG	392	247
AAAGCATGGAAGAGGAGGCG	5	0
AAAGCCACCCGTGCCTTCCGT	9	10
AAAGCCCCAGACGAGACTTG	9	3
AAAGCCCTGAGCACAGTGCC	4	2
AAAGCCGGGCACAGTGTCCG	5	4
AAAGCCGTCATGGCCGGAGC	3	6
AAAGCCGTGGCCGGTAGCGC	10	15
AAAGCCTCAGACGAGACCTG	7	6
AAAGCCTCAGACGAGACGTG	16	5
AAAGCCTCAGACGAGACTCG	11	7
AAAGCCTCAGACGAGACTGG	11	5
AAAGCCTCAGACGAGACTTA	19	1
AAAGCCTCAGACGAGACTTG	2273	1863
AAAGCCTCAGACGAGCCTTG	5	5
AAAGCCTCAGACGAGGCTTG	10	11
AAAGCCTCAGACGGGACTTG	6	1
AAAGCCTCAGGCGAGACTTG	5	0
AAAGCCTCGGACGAGACTTG	8	4
AAAGCCTGGGATAGAGGCA	5	10
AAAGCGAGCTGCCTGAGAGG	4	0
AAAGCGATCTGCTTGAACCC	4	1
AAAGCGGAGGCCTGGACAGC	1	5
AAAGCTAGGATGGGTAGGAC	0	9
AAAGCTATGGGAGCTGCTCC	0	4
AAAGCTGAAAGCGGGCGAGG	4	0
AAAGCTGAAAGCGTGCAAGG	1	8
AAAGCTGAAAGCGTGCGAGG	652	100
AAAGCTGAAAGCGTGCGCGG	5	0
AAAGCTGAGGGTCTTGTCCA	9	0
AAAGCTGGAAGCGTGCGAGG	4	1
AAAGCTGGCGGCCCACGGCTT	4	5
AAAGGAACCGCAGGGAGCAA	2	5
AAAGGAACTGAGGTGGCCGT	5	5
AAAGGACAAGCCGCGCTGAG	2	5
AAAGGACCCCGGGGCATCCC	4	0
AAAGGACGGCCTTTGCGTGC	2	9
AAAGGAGAGGGAGCGAGCGG	6	0
AAAGGAGAGGGAGCGAGGGG	11	5
AAAGGAGAGGGAGCGAGTGG	436	327
AAAGGAGAGGGAGCGGGTGG	4	1
AAAGGAGAGGGGGCGAGTGG	4	0
AAAGGAGATAACATCATGGC	0	6
AAAGGAGATACACAGTGCAG	0	11
AAAGGAGGTACACAGTGCAG	396	290
AAAGGAGTGGCTGGGTGCC	3	8
AAAGGATGCGTGTGAAGCTC	18	61
AAAGGATGGCAACACGTGCC	3	8
AAAGGCACCGACCAATCTGC	5	11
AAAGGCAGACACTCTCAGGG	6	6
AAAGGCCCAGCTCGTTCCGA	1	5
AAAGGCCTACACGCCCGACC	1	4
AAAGGCTCAGACGAGACTTG	0	6
AAAGGCTGTACCAAGTGCTC	213	8
AAAGGGCAGAGACTGAAGCC	0	4
AAAGGGCGGGGTGGAGGAGG	65	43
AAAGGGCGTCTGCTGTCCCT	1	4
AAAGGGGCCAACTGTGCCAG	5	0
AAAGGGGGTTGTGAGGTGA	4	1
AAAGGGTGGCGGTGGGGCC	159	235
AAAGGGTGGCGGTGGGTGT	0	5
AAAGGGTTGGGGGGACATCG	1	4
AAAGGTCCTAAGTACAGACA	9	1
AAAGTAACCTGTGTTGTTTG	0	9
AAAGTAACGGCAGCGGGGCG	335	264
AAAGTAGCGCGAGGCCCAGG	5	3
AAAGTCCTGGCCTTCGGTCT	0	14
AAAGTCTCACTCTGTGATCC	2	5
AAAGTGCAAAGGCCAGGATA	1	8
AAAGTGCAAAGGCCAGGATG	607	463
AAAGTGCAGTGAGGGGAATGG	18	8
AAAGTGCCTGTGAGGACT	0	6
AAAGTGTAGAGGCACGATCT	8	2
AAAGTGTCGTGTTGACAGGC	4	4
AAATAACTGAATGAAGTTGC	0	5
AAATAAGGCGCTGTCGGACT	0	16
AAATACTGCAAGCATGGAAG	0	6
AAATAGCCAGGCATGGTGGC	4	0
AAATAGCCGCCCTTCCGTGT	2	4
AAATCACACGTGGCGGGCGT	0	5
AAATCCGCAAACGCCAAGTG	0	13
AAATCGTGATCCCCACGTGT	2	5
AAATCTCAGGTGTGTGTGTG	7	5
AAATGACTGGGTCACGTGGT	0	4
AAATGAGCTTGGGCAGGGCG	1	8
AAATGAGGCGCTGTCGGACT	6	0
AAATGATGCGCGTGGTGCAT	6	4
AAATGATGTGCGTGGTGCAG	4	1
AAATGATGTGCGTGGTGCAT	513	339
AAATGCAAGAGTAGTGATGC	7	8
AAATGCCTCGTGGCATGTGG	197	150
AAATGCGAGAGGAAGGTGGG	8	0
AAATGCTCAGCCTCAGGTGT	8	0
AAATGGAGAGGCAGATGATG	0	4
AAATGGAGGCCCGTCAGCCG	5	5
AAATGGAGGCCCGTCAGCCT	7	3
AAATGGCAGACGGGGCTATC	437	356
AAATGGCAGCATGAGGGGAG	0	4
AAATGGGGTCACTTGGGCAT	6	0
AAATGGTGTGGCTTCGGCCT	4	0
AAATGTGGCTCCCACGTGTGG	0	6
AAATTAGCCAGGCGTGGTGG	560	39
AAATTAGCCAGGCGTGGTGGT	6	0
AAATTAGCTGCGTGTGGTGG	4	4
AAATTAGCTGGGTGTGGTG	11	0
AAATTCAGCGCCCGTCTGCC	2	5
AAATTCCAGGAGGCTGAGGT	1	5
AAATTGCATGGCCAGGCTGC	8	6
AACAAAGGTGGGATGTGGA	6	0
AACAAAGGTGGTGCCAGTCC	4	6
AACAAAGTGATCGCAGTGGC	0	7
AACAAAGTGGCCATGATGGT	2	4
AACAAATCGTGTGTGGTGGC	8	8
AACAACAACTGCTGCAGGTG	5	7
AACAACCAAGCCATGTGGCT	2	4
AACAACCCTGCCTAGACAC	0	8
AACAACGGCACACTCAGTGG	3	5
AACAAGACAGCCTCCATCAC	8	10
AACAAGATTTTATGGTTTGC	0	5
AACAAGCCTTGCCTGGACCT	0	5
AACAAGCGTCCGGCGCTGCG	7	8
AACAAGGCAGACGGACGGA	0	6
AACAAGGCAGAGGGAGAAAG	4	0
AACAAGGCAGCATTGAGCTA	256	120
AACAAGGCAGCATTGAGCTC	4	0
AACAAGGGCATGCCCAGTGG	115	204
AACAAGTGGGCATGAGGCGG	4	0
AACAAGTGGGCATGAGGGGG	5	0
AACAAGTGGGCATGAGGTGG	409	29
AACAATGCCTAGGCCTCGGG	0	5
AACAATGCTTGGCAGGTGG	0	5
AACAATGTGGACCAGTTGCCC	3	9
AACACACCAGGCCTAATTAC	0	6
AACACACCCACAGGCTGCCT	5	0
AACACACCTCTCTGCCCCGG	6	0
AACACAGATCTGCGGATCTC	9	6
AACACAGCAGCGGTGGGCTC	2	4
AACACAGGGAGCTGGGAACC	0	10
AACACAGTAGACTGGGGCCA	0	4
AACACCATCGCCATCGCCT	4	1
AACACCCCTCCCAGTGGGGC	0	4
AACACCTCATGCAGGGCTTGG	7	9
AACACCTCCAGCAGCAGACC	11	10
AACACCTTCTGCGCGGGGC	14	15
AACACCTTGCATGATGTCGT	8	6
AACACGACGCTCTTGCGATC	73	108
AACACGACGCTCTTGCGATCT	24	31
AACACGCCAGGTCAGACGCT	4	0
AACACGGCAGGATGAGGGAC	3	4
AACACGTATGGACACAGTGC	0	4
AACACTTTTGGAGGCCGAGGC	5	17
AACAGAGGCATCACGTGGCC	4	2
AACAGATCCTGGTGAGGTTG	4	3
AACAGATGATGCTGCAGGTG	0	5
AACAGATGCTGGCGAGGCTGT	1	4
AACAGATGCTGGTGAGGCTG	4	0
AACAGCAGGCAAGGCGGCCG	4	3
AACAGCAGGCAAGGCGGCCT	412	433
AACAGCATCAGCTACACCTG	1	4
AACAGCATGCTCTTCAAGCTT	0	24
AACAGCCACCAGAGGGTGCT	5	12
AACAGCCCAGGCCTGTGACC	0	7
AACAGCCTGTGTCCCTGGTGT	0	4
AACAGCGAGGCTTGACAGGC	4	5
AACAGCGATCGCTCGCAGCG	4	11
AACAGCGCCAGCGCTCCG	0	20
AACAGCGGCGCCCGAGGCAG	5	3
AACAGCGTACAGCAGCGGCAG	6	2
AACAGCTAGAGGGCACGCGT	8	3
AACAGCTCAGTGTGCAAGGC	5	5
AACAGCTCCAGGGAAGGTTG	18	0
AACAGCTGCACATGGTGTTC	107	112
AACAGCTTGCACCATGTGCC	5	3
AACAGCTTGCACTGTGCGC	2	9
AACAGGATGTGGCGAGCACA	4	6
AACAGGCCCTAGGACGGGAG	7	9
AACAGGCTGAGCTGAGGTCC	8	13
AACAGGCTTAAGCAAGGGGT	2	9
AACAGGGCCGCAACGATGGA	4	1
AACAGGGTCGTCCGCGCGGG	6	7
AACAGGGTGCAGGCCTGGGG	0	5
AACAGGTCCCAGGACGGGAG	3	6
AACAGGTCCTAAGACGGGAG	4	3
AACAGGTCCTAGGACGGAG	0	5
AACAGGTCCTAGGACGGGAG	1732	1750
AACAGGTCCTAGGACGGGCG	18	4
AACAGGTCCTAGGACGGGGG	17	8
AACAGGTCCTAGGACGGGTG	0	4
AACAGGTCCTAGGATGGGAG	4	1
AACAGGTCCTAGGGCGGGAG	9	5
AACAGGTCCTGGGACGGGAG	1	4
AACAGGTCTTAGGACGGGAG	0	5
AACAGGTGCTGGAGAGGATG	4	0
AACAGGTGTCGGTGAGGATG	7	3
AACAGTCAACAATCTCGTATG	13	8
AACAGTCCCAGCCGCGAGCC	35	0
AACAGTGGGAGGAGTGCACC	4	2
AACATACAAGGCCAGGCCC	5	7
AACATCCCTGACTGCAGGACG	2	4
AACATCGCAGTGCTGCTCGC	8	10
AACATCGCGCGCTGGGACGG	5	11
AACATGCCAGGCCTGAGCTG	11	14
AACATGTGCTGTGTCCACCC	4	0
AACATGTGCTGTGTCCACTC	367	15
AACATTTGCTGTGGCAACCC	3	8
AACCAACAGTGTGGCAGGCT	2	4
AACCAATGGCTGGAGGTAGA	0	4
AACCACGCGCGCTACGCCAG	0	4
AACCACGTACAGCCGTGTGC	0	4
AACCACGTAGGAGGAGGCGG	5	4
AACCAGACATCAGCCTGACG	4	3
AACCAGCATACCCACGCTGT	7	9
AACCAGCTGATGTGCAGCCC	13	12
AACCAGGGCACAACTCAGGGT	3	4
AACCAGGGCAGTGCACAGCT	4	6
AACCAGGTACTGTTGTGGGGT	1	7
AACCAGGTCAGCTGTGAGCT	2	8
AACCAGGTTTCAGAGGTCAT	0	5
AACCAGTGCTGGCGAGGAGG	0	8
AACCATGCTCAGCCACATGG	4	0
AACCATTGTGGAAGACAGTG	0	7
AACCCACAGCCGTGTGGACC	10	4
AACCCACGCAGCACGTTAGT	3	4
AACCCAGACACCTCTGTGCC	5	6
AACCCAGCCATCGTGCTGTG	2	4
AACCCAGCTGTGCCCCTTGC	4	2
AACCCCAACTCGTGGCAGGC	3	6
AACCCCACACACGCGAGGGC	17	22
AACCCCACGTGTGCGTGTGT	2	6
AACCCCACGTGTGCGTGTGTG	4	7
AACCCCCTGGGGCTGCAGGC	148	129
AACCCCCTGGTGGCTGATCC	2	6
AACCCCGTGCCCCTCAGAGC	4	4
AACCCCTCCTGCTGGGGTGC	0	16
AACCCCTCGAGGCCTAGCGG	5	5
AACCCGAACCCGGGATGCGG	0	4
AACCCGAGTTCCTTGCTCTGG	6	13
AACCCGCACCCCTGAGGGCT	6	3
AACCCGGCCGGGGCAGAGGC	2	4
AACCCGGCCGGGGCAGAGGT	228	260
AACCCGTGCTGCTGCTTGCGG	12	9
AACCCGTTGAGCAGCGTGTTC	3	7
AACCCTACCACACGCTGGCC	6	4
AACCCTGGTCTAGGAGGCCT	4	4
AACCCTTCGCTGTGCTCGCC	6	1
AACCGACCAGCCGGAGGTCT	0	7
AACCGACGCCACTTCGGGTT	5	1
AACCGACGCCACTTCGTGCT	5	1
AACCGACGCCACTTCGTGTT	366	338
AACCGAGGGGCTCTTGACTG	690	550
AACCGATTCCCCACATGAGG	1	4
AACCGCAACTGATGTGCAGG	0	5
AACCGCATAGCTGGTGTCC	2	5
AACCGCATGGATGGAGCTG	9	0
AACCGCCATGCCTCAGGGTC	19	24
AACCGCCTCTCCCCGCGCGT	1	9
AACCGCGACGAGCCATATT	0	4
AACCGCTCAGCATATGCCGC	1	4
AACCGCTGTCAGCGATGGT	5	9
AACCGCTGTCGCCGGGGCTG	1	4
AACCGCTTCTCTTCCGCCCC	2	5
AACCGGAGCAAATCACGGCC	0	11
AACCGGCGCATGTTAGGGAC	3	5
AACCGGTGGAGCGCATCTCC	7	5
AACCGTCATGCGCTCACCGG	8	13
AACCGTGTTGCATGGTCCGC	21	21
AACCTAGCCTGGTGGCACTG	315	394
AACCTCAACCCCGCATTGGTA	6	0
AACCTCAACCCTGCACTGGTA	5	1
AACCTCAACCCTGCATTGATG	9	0
AACCTCAACCCTGCATTGGCA	7	6
AACCTCAACCCTGCATTGGGA	7	7
AACCTCAACCCTGCATTGGTA	1025	969
AACCTCAACCCTGCATTGGTC	5	0
AACCTCCCAGGCGGAGTGTGG	5	4
AACCTCCCCTGTGCTGACGT	9	12
AACCTCCGAGTCCCAGGCTT	0	5
AACCTCCTACCCTGACTGCT	5	0
AACCTCGACCCTGCATTGGTA	3	4
AACCTGATCCGCGAGCGG	6	8
AACCTGATCCGCGAGCGGGT	3	4
AACCTGCTGTTACCGCGGCC	0	12
AACCTGGCCAGCAGGGCGT	1	4
AACCTGGGAGGCCACGAAGC	4	0
AACCTGGGAGGCGGAGGTT	5	0
AACGACCTGGGAGAATCCGC	61	16
AACGACCTTGGGGTGGCCGT	9	22
AACGACGCCCAGGCCTCGT	1	6
AACGACGCCCAGGCTCCGT	5	5
AACGACGCCCAGGCTGCGT	5	3
AACGACGCCCAGGCTTCGG	4	0
AACGACGCCCAGGCTTCGT	757	865
AACGACGCTCTTGCGATCT	18	46
AACGACGCTCTTGCGATCTA	12	5
AACGACGCTCTTGCGATCTAT	1	6
AACGACGCTCTTGCGATCTC	13	22
AACGACGCTCTTGCGATCTG	35	17
AACGACGCTCTTGCGATCTT	4	7
AACGACGTGGTCCTGCACCC	5	5
AACGACTGAGAGCTAAGTGC	8	4
AACGACTGGGTCCTCAATGG	4	0
AACGACTTAGGGCGTGACTG	10	0
AACGAGCCTGCAGTCTGGTG	1	4
AACGAGGCCGATCGGGGCCT	5	0
AACGAGGCTGATCGGGGCCC	4	1
AACGAGGCTGATCGGGGCCT	501	333
AACGAGGGTCATGGAGGTCA	0	7
AACGAGTCCTGACGGTGACG	6	1
AACGATGGAGCTGTGCCTGT	4	6
AACGATGGGCAATGGTAGGT	6	0
AACGATTCAGCTGCGCGGCGG	21	17
AACGATTGGGTCCCCAATGG	4	2
AACGATTGGGTCCTCAATGG	283	277
AACGCACTGCGTAGACGGCGC	4	6
AACGCAGGGATGATTGACCGG	3	4
AACGCAGTGACTAAGCAGGCC	10	0
AACGCAGTGATGATTGGTGT	5	8
AACGCCAGCATGGAGGGAGC	10	24
AACGCCATCCAGGTAAGCGC	10	7
AACGCCCCCAAATCGATCGC	90	112
AACGCCCCGGCGCCAAGCGT	0	5
AACGCCCGAAGCCCAGGTAC	2	5
AACGCCGACACGAGTGAGACG	4	1
AACGCCGCGCCGAGGAAGGC	6	2
AACGCCGGACCGGCTGGGTG	0	8
AACGCCGGCACGAGGGAGACG	2	4
AACGCCGGCACGAGTGAGACG	803	854
AACGCCGGCACGAGTGAGCCG	6	1
AACGCCGGCACGAGTGAGGCG	7	4
AACGCCTCAAGGGTGGGGA	1	4
AACGCCTCAGACGAGACTTG	1	4
AACGCGATCGGCTGGGGCGC	6	7
AACGCGCGGCGCTCTGTGCT	10	22
AACGCGCGGCTCCGAGGAAG	790	921
AACGCGCGGCTCCGAGGAGG	3	5
AACGCGCGGCTCCGAGGCAG	5	5
AACGCGCGGCTCCGAGGGAG	5	4
AACGCGCGGCTCCGCGGAAG	4	0
AACGCGCGGCTCCGGGGAAG	0	5
AACGCGGCAGTGTTGGGAGG	10	6
AACGCGGGCCGGGGGCGTCG	3	4
AACGCGGGCCGGGGGGGTCG	5	4
AACGCGGGCCGGGGGTATCG	4	0
AACGCGGGCCGGGGGTGCCG	5	2
AACGCGGGCCGGGGGTGTCG	488	713
AACGCGGTGGCCGAGGAGAT	7	9
AACGCGTGGCTATGCGAGCA	7	4
AACGCTCTTGCGATCTAGCT	1	6
AACGCTCTTGCGATCTAGGC	4	2
AACGCTCTTGCGATCTCG	4	4
AACGCTCTTGCGATCTGGCT	5	2
AACGCTCTTGCGATCTGGTC	4	1
AACGCTCTTGCGATCTGTCG	3	8
AACGCTCTTGCGATCTGTGG	6	4
AACGCTCTTGCGATCTTGCC	5	8
AACGCTGCAGCCTGGGGACC	5	9
AACGCTGTATTGAGCTGTCC	0	7
AACGCTTCAACGCGGCAGCC	7	4
AACGGAATCAACGCGAGTGC	4	0
AACGGAATTGGGGGAAGGGA	214	180
AACGGAGCAGGGGCACAGAG	226	130
AACGGAGCGGGGGCACAGAG	4	0
AACGGAGTCACTGTCTGAGA	228	158
AACGGAGTCACTGTCTGAGC	6	0
AACGGAGTCACTGTCTGAGG	4	3
AACGGATTGTCGATCGCGGG	5	3
AACGGATTGTCGATCGCGGT	205	234
AACGGCACACTTGCTCTGCC	5	4
AACGGCACCTGGCACGTGGC	39	49
AACGGCAGCAGATGCTTGCT	9	10
AACGGCAGCGTTCAGTGCC	0	6
AACGGCATGAACCCAGGAGG	1147	68
AACGGCATGAACCCAGGCGG	8	0
AACGGCATGAACCCAGGGGG	9	0
AACGGCATGAACCCGGGAGG	6	0
AACGGCATGAGCCCAGGAGG	8	0
AACGGCATTCGCGGTGACCT	3	6
AACGGCCCGACTGTTGAGTG	5	5
AACGGCCTCAGGCAGTTCGT	8	14
AACGGCCTCGGGAGAAGCGC	3	4
AACGGCCTGAGGTTGGGCT	3	7
AACGGCGCCCAGGCTTCGT	4	1
AACGGCGTCCGAACCGACCC	515	638
AACGGCGTGCCGCTCGGG	11	6
AACGGCGTGCCGCTCGGGC	8	8
AACGGCTGCACGTCCGTGGC	25	23
AACGGGAAACTAGCTCGGCT	5	1
AACGGGAAGGGACTCTCCCT	4	7
AACGGGACAGTGGTCGGGGT	0	4
AACGGGAGGGCACCACCTGC	8	2
AACGGGATAGTGCATGACGT	0	5
AACGGGCCGGGCAGCTCCGA	9	0
AACGGGCTGGGTGGCTGTGG	4	2
AACGGGGAGGCGGAGAGCA	3	4
AACGGGGAGGGCCCAGGGGC	7	9
AACGGGGATGTGGGAGAGTC	0	7
AACGGGTCCTAGGACGGGAG	6	5
AACGGGTCTCACTGTTGCCC	9	0
AACGGTCGTCGGGCAGGTCG	2	9
AACGGTGCCTGCCCTGGGCC	4	8
AACGGTGCTGACGTCGATC	4	1
AACGGTGCTGACGTCGATCG	6	6
AACGGTGCTGGCCGTGTTC	7	8
AACGTCAAGGAGGAGGTGGC	30	15
AACGTCACACGCGACCACGT	1	7
AACGTCACTGCGCACGGGGC	5	4
AACGTCATCTTCTCTGCCAC	0	8
AACGTCCCCAGCCGATGAGG	5	4
AACGTCCCCCGCCCTGAGGT	7	5
AACGTCCCTGGCATGGCAGC	0	4
AACGTGAGGCCAGACGGGTG	3	5
AACGTGATAGCCGCGGGGCCG	0	16
AACGTGCAAGCGAGGACGGC	14	23
AACGTGCTGTACCCTCACTG	186	288
AACGTGCTGTGGTGACTG	0	5
AACGTGGCTAAGGGTGTGGC	0	4
AACGTGGGGTTCAGGGGAGC	1	6
AACGTGGTTGGGTTCTGGT	4	2
AACGTGTCGGTCTGGGAGGT	4	4
AACGTGTGCTCTTGCAATCT	10	0
AACGTGTGCTCTTGCGATC	6	4
AACGTGTGCTCTTGCGATCT	74	95
AACGTGTGTCATGGTGGTTT	5	3
AACGTGTGTCCTGAAGAACC	0	8
AACGTTCCAGGGCTGGCGGT	4	8
AACGTTTGAGAGTAAGTTGC	0	6
AACTACTCAGGATGCTTGTT	4	1
AACTAGCTGGGCGTGGTGG	8	0
AACTAGGGTCCTGGGGAAG	2	4
AACTAGGTCGCAGCGGGAGA	0	20
AACTATCCTAACCTCTTCCT	0	4
AACTCACCGTGCCGGGGCCG	12	13
AACTCCCAGTAAGCCGGGCG	4	1
AACTCCGTCCAAGGGGCACC	4	3
AACTCGACGCTCTTGCGATC	0	4
AACTCGGCCAGCAGGGCGT	2	4
AACTCTGCATCCAGGTGCTG	0	5
AACTGAATAGCCCGCAGCCCC	0	12
AACTGACGCTAAGAGTGGGGT	0	6
AACTGAGCTTAATCGGTGCC	3	7
AACTGAGGAAGCAGGGGCTC	8	0
AACTGAGGCTCAGAGGGGGT	4	4
AACTGAGTTTGGTCAGCAGAT	3	4
AACTGATAGCCCAGAGGCAT	9	4
AACTGCAGCTGGCCCTCGCT	0	4
AACTGCCAAGCCCACGTGAC	3	6
AACTGCCCCCTGGTGCTGGC	6	6
AACTGGACGCCAGGAAATTG	0	6
AACTGGCCTGCCGGTGTCTG	5	0
AACTGGCTGCGCTGTCTTGC	4	5
AACTGGGACAGGGACGCGG	4	1
AACTGGGCCATGGCAGGGC	1	5
AACTGGGCCATGGCAGGGCG	6	2
AACTGGGTCGCAGCGGAAGA	8	0
AACTGGGTCGCAGCGGGAAA	0	5
AACTGGGTCGCAGCGGGAGA	777	628
AACTGGGTCGCAGCGGGAGC	13	0
AACTGGGTCGCAGCGGGAGG	11	6
AACTGGGTCGCAGCGGGCGA	7	2
AACTGGGTCGCGGCGGGAGA	4	1
AACTGGGTGAGCCTAGACTT	4	4
AACTGGTTCATGGTTGACGT	3	9
AACTGTATCCAGAGGGGCGT	0	10
AACTGTGAGCGTTCCGGTGC	0	4
AACTTCAGCAGCAGCTGCCC	14	17
AACTTCGCTGCCTGGCTGCC	2	6
AACTTCGCTGCCTGGCTGTC	1	5
AACTTCTGCTGAATGAACAGA	0	4
AACTTGGCCAACGTGGCAC	4	0
AACTTGGCCAGCAGAGCGCT	0	14
AACTTGGCCAGCAGGGCAT	2	4
AACTTGGCCAGCAGGGCGC	4	5
AACTTGGCCAGCAGGGCGG	8	4
AACTTGGCCAGCAGGGCGT	899	944
AACTTGGGCAACATGGCTGG	187	270
AACTTGTCCATGGGCCAGGG	12	12
AAGAAAACTGAGTACTCAGG	6	0
AAGAAACAGACTGATATCGC	0	12
AAGAAAGCCTGGGCAATGGT	4	2
AAGAAAGGCGTGTCCGTGTG	4	1
AAGAAAGGGCACCGAGGCGG	4	1
AAGAAAGGGCGCCGAGGCGG	1206	976
AAGAAAGGGCGCCGGGGCGG	1	4
AAGAAATTCCCCGGCTTGTG	0	63
AAGAACACAAAGCGGGGGGA	680	560
AAGAACACAAAGCGGGGGGC	11	0
AAGAACACAAAGCGGGGGGG	13	8
AAGAACACGGCAGGGCTAAG	5	0
AAGAACTTGCCCGGCAGGTC	7	0
AAGAAGCAAGGAGAGTCCAG	9	0
AAGAAGCAGACGAGCTGTCC	6	4
AAGAAGGCACTAGGAAGCGC	7	0
AAGAAGGGCCCCCAGGGACG	779	782
AAGAAGGGCCCCCAGGGGCG	3	5
AAGAAGGGCCCCTAGGGACG	5	2
AAGAAGGGCTCCCAGGGACG	0	5
AAGAAGGGGAGGGCATGTGC	6	5
AAGAAGGGGCGCCGAGGCGG	4	0
AAGAAGGGGCGGGAGACAG	24	0
AAGAAGGTGAGGATGGGCGT	4	4
AAGAAGTGGTGTAAAACTGC	0	5
AAGAATTGTGAGCTACGGCT	4	11
AAGACAAGAGTCCATGACCT	0	5
AAGACAAGGGCTGGGCGCAG	9	3
AAGACACAGGCTGGCAGAGT	5	2
AAGACACCTCGGCGACAGGC	288	353
AAGACACCTCGGCGGCAGGC	0	4
AAGACACCTCGGCGTCAGGC	8	0
AAGACACGTGGCCGGTCA	3	10
AAGACACTGGCCAGGACCGG	3	5
AAGACAGACTCTTCGGAGGGC	1	6
AAGACAGAGGCGGAGGCAGC	8	2
AAGACAGAGGCGGAGGCAGG	8	3
AAGACAGAGGCGGAGGCAGT	741	417
AAGACAGAGGCGGAGGCGGT	5	1
AAGACAGAGGGGACCTGGGCT	5	4
AAGACAGTCATGTGAGGGGG	6	6
AAGACATGTGAGCAGCAGCC	4	5
AAGACCACGTGGGCACGCTG	3	4
AAGACCAGGACCACCTGCCC	2	13
AAGACCCGGAACCGAAAAGC	52	63
AAGACCCTGTGCCCATGAAC	5	3
AAGACCGTGAAGGCGGCGGC	9	7
AAGACCTCCAGCTAATGCCC	0	4
AAGACCTCTGCCCAGCACAT	4	1
AAGACGCAAACCTAACACGC	91	140
AAGACGCGCGCCGGCCAC	0	15
AAGACGCGCGCCGGTCTCTT	216	219
AAGACGCTCTTGCGATCTC	9	9
AAGACGGACGCGCAGCAGGT	3	4
AAGACTGGGGCCCAGCCGGTG	4	3
AAGACTGTTCCGGTAGTGGC	4	2
AAGACTTTGCTGGTATGT	0	6
AAGAGAACCTCCTCTAGGGT	83	44
AAGAGAAGCAAACCACGACC	0	4
AAGAGAAGCAAACCGCGACC	311	176
AAGAGAAGTGCGAGGGAAG	2	10
AAGAGAATGAGGAGTTTCTG	4	3
AAGAGACTGGAGGAGGCGCC	1	5
AAGAGAGCGAGTGACGAGCG	0	10
AAGAGAGGACAGGAAGGTGG	4	0
AAGAGAGGGGAGGTGGTCGC	3	4
AAGAGAGTGGAGGCGGTCGC	4	0
AAGAGAGTGGAGGTGGTCGC	525	291
AAGAGAGTGGCGGTGGTCGC	5	0
AAGAGAGTGGGGGTGGTCGC	4	1
AAGAGCACGGCAGGGCTAAG	599	437
AAGAGCAGGCTGGGTGGAGC	6	6
AAGAGCCCCGACGGCCGACCA	7	3
AAGAGCGACACTGGGGGAGC	529	666
AAGAGCGACACTGGGGGCGC	5	1
AAGAGCGACACTGGGGGGGC	8	3
AAGAGCTGCGGAGGATGCTT	8	3
AAGAGCTGGCTGAAGTTCGT	0	7
AAGAGGAAGACGGGGGGCC	1	6
AAGAGGACTACGTCACGGGC	0	12
AAGAGGAGAAGGTGGAGGGT	1	6
AAGAGGAGATGGCTTGCAGC	5	5
AAGAGGAGGAGGCGGAGGGT	4	3
AAGAGGAGGAGGGGGAGGGT	6	3
AAGAGGAGGAGGTAGAGGGT	0	15
AAGAGGAGGAGGTGGAGGGC	5	4
AAGAGGAGGAGGTGGAGGGG	17	5
AAGAGGAGGAGGTGGAGGGT	771	574
AAGAGGAGGAGGTGGGGGGT	5	3
AAGAGGAGGTTGGCGGGAG	0	8
AAGAGGCGCCTGTGTCCGTA	7	0
AAGAGGCTTGAGAAAATGGT	1	5
AAGAGGGCAATGCAGCCACC	6	2
AAGAGGGCACGCGAGACACGT	1	8
AAGAGGGCACTGGTCACCTC	0	5
AAGAGGGCAGTCACAGGGTT	5	1
AAGAGGGCGGACGACGCAGC	306	359
AAGAGGGCTGGGCGTGCCC	6	8
AAGAGGGGCCCCCAGGGACG	1	5
AAGAGGGTGAGTGGAGCCTG	6	0
AAGAGGGTTGAGAAAATGGT	3	6
AAGAGGTAGAGCTGTGCGT	0	6
AAGAGGTCTGAGAAAATGGT	4	7
AAGAGGTGCCCGTGTCCGTA	7	1
AAGAGGTGCCTGTGTCCGCA	8	2
AAGAGGTGCCTGTGTCCGGA	4	3
AAGAGGTGCCTGTGTCCGTA	1092	795
AAGAGGTGCCTGTGTCCGTC	11	2
AAGAGGTGTGAGAAAATGGT	4	2
AAGAGGTTCGAGAAAATGGT	4	4
AAGAGGTTTAAGAAAATGGT	24	1
AAGAGGTTTGAGAAAATGGC	2	5
AAGAGGTTTGAGAAAATGGG	13	12
AAGAGGTTTGAGAAAATGGT	997	1168
AAGAGGTTTGAGAAAGTGGT	14	3
AAGAGGTTTGAGGAAATGGT	3	4
AAGAGTCCAGACTGAGGTGC	9	5
AAGAGTGTGCGGGGGACGT	5	6
AAGAGTTGCATCTGTGGGT	0	7
AAGATACCGTAGACAGGTGG	0	8
AAGATCCCTAAGGCCAGGCC	0	7
AAGATCTTCAGCCTTGAGGGT	5	4
AAGATGACGGTGGTTAGGT	2	11
AAGATGACTGCTGCTGCTCC	1	4
AAGATGATGGCTGGGTGCA	2	4
AAGATGGCCCCTGGGGATCT	183	182
AAGATGGCGCCCTACGGCGA	5	2
AAGATGGCGCCCTACGGGGA	5	4
AAGATGGCGCCCTACGGTGA	456	485
AAGATGGCGCCCTACGGTGC	7	0
AAGATGGCGCCCTACGGTGG	5	1
AAGCAAACTACCAGGTGTGG	4	2
AAGCAAAGGAGCAGCACGTGT	4	1
AAGCAACCTGCACCCAATGA	1	5
AAGCAACTCATGGTGCACCGT	4	2
AAGCAACTGCATGCACGTCT	7	0
AAGCAACTGGGAGAGGTACC	7	0
AAGCAACTGGGGGAGGTACC	470	496
AAGCAAGCCAGGGCCCACGT	4	3
AAGCAAGCCTGAGCAATGGC	4	0
AAGCAAGCCTGGGCAATGGC	347	30
AAGCAAGCCTGGGCAATGGT	19	0
AAGCAAGGCTGCAGCCACCC	9	1
AAGCAAGTGGGCACTTAGGC	5	11
AAGCAATCTGGGGCAATGGC	1	7
AAGCAATGCGGGGGCGGGGA	35	36
AAGCAATGGAGAACAGCCTG	0	5
AAGCACACCACTTCAGCTA	623	567
AAGCACACCACTTCAGCTC	4	0
AAGCACACCACTTTAGCTA	4	0
AAGCACATGGTGTCCAGGTGT	8	7
AAGCACCAGTGCCCCCTGCG	8	6
AAGCACCATCCTGCCACCTG	13	5
AAGCACCATGAGCAGATCGC	4	2
AAGCACCCAGGACGGTGCCC	575	660
AAGCACCGCGCTTGTGCAGT	0	5
AAGCACGAGGCTCGGAAGCG	0	6
AAGCACGCCAAGTTAGGCCC	4	3
AAGCACGCCAAGTTAGGCCG	5	2
AAGCACGCCAAGTTAGGCCT	461	460
AAGCACGCCAAGTTAGGG	4	0
AAGCACGCGAGCGGCGCTGGA	597	682
AAGCACGCGAGCGGCGCTGGC	5	0
AAGCACGCGAGCGGCGCTGGG	8	1
AAGCACGCGGGCGGCGCTGGA	2	4
AAGCACGGTTGGTGGGTTTG	4	0
AAGCACGTGGACCGACACCC	4	9
AAGCACTCAGCTGGGCGCGG	12	12
AAGCACTGGGAGTGAGGTCC	5	1
AAGCACTGGGCTGGGCGAGG	82	121
AAGCACTTCCCACCACGGCC	9	7
AAGCAGAGGCCCGTGTGCCC	13	13
AAGCAGAGTGGACCTGCCCA	7	2
AAGCAGAGTGGACCTGTCCA	704	423
AAGCAGAGTGGACCTGTCCC	11	0
AAGCAGCAGGGGACTGGACC	953	943
AAGCAGCAGGGGACTGGCCC	6	1
AAGCAGCAGGGGACTGGGCC	4	2
AAGCAGCAGGGGGCTGGACC	4	5
AAGCAGCAGTGCCAGGACTG	4	2
AAGCAGCAGTGTCCAAGGAG	334	307
AAGCAGCAGTGTCCAAGGCG	7	0
AAGCAGCCTGGCTGTGGGG	9	3
AAGCAGCCTGGCTGTGGGGA	1	5
AAGCAGCGCCCCCTGCTGTG	9	0
AAGCAGCTCCTCCAGGTGGT	5	2
AAGCAGCTCTGGTGTGGCCT	5	3
AAGCAGCTGATGGGTAGTGA	1	6
AAGCAGGAGCCCTGATGCCG	5	3
AAGCAGGCCGCCGTTCAGGC	1	4
AAGCAGGCGCCCAGTTTCTC	5	5
AAGCAGGCTGCCTTCATGGG	31	16
AAGCAGGGCTTTTGGCAGC	4	5
AAGCAGGGGCAGCCCAGGTC	9	3
AAGCAGGGGGCCACCAGCCT	5	4
AAGCAGGGGTGGGGTGGGCA	6	8
AAGCAGGTAGGCAGATAGGC	0	5
AAGCAGGTCCTCCACGGCCC	3	4
AAGCAGTCAGGCAGGCAGGC	4	0
AAGCAGTGGAGCAGGGTGA	0	4
AAGCAGTGTCACGCAGAGCT	6	0
AAGCAGTGTCACGTAAAGCT	1	6
AAGCAGTGTCACGTAGAGCG	4	3
AAGCAGTGTCACGTAGAGCT	663	518
AAGCAGTGTCGCGTAGAGCT	4	1
AAGCATCCCACACGTGGCC	3	8
AAGCATGCGGCCAAGGGTGC	0	5
AAGCATGTCACACGGGGTGG	0	8
AAGCATTCGGTAGGAGACCT	176	200
AAGCCAAGGCCAGGAAGGGC	4	2
AAGCCAAGGCCAGGAAGGGG	10	3
AAGCCAAGGCCAGGAAGGGT	521	280
AAGCCAAGGCCGGGAAGGGT	5	1
AAGCCACAGCACCGGCAGCC	10	12
AAGCCACATGATAAGGATG	0	6
AAGCCACGCAGCACGTTAGT	6	1
AAGCCAGAGGGACGTCGAGG	0	5
AAGCCAGCAGGGGGCAGCGT	5	4
AAGCCAGCAGTGGCAACCAT	525	486
AAGCCAGCCACCACCACTGC	2	4
AAGCCAGCTACCACCACTGC	654	913
AAGCCAGCTACCACCGCTGC	5	1
AAGCCAGCTACCACCTCCTGC	6	0
AAGCCAGGACAGCAGCTGCT	8	5
AAGCCAGGAGCGGCGCTGCT	19	15
AAGCCAGGGACTTGGGAGTC	1	7
AAGCCAGGGTGGCAGGGCTC	267	212
AAGCCATCCAGCTGGTGGG	0	10
AAGCCCACCTCGCAAGGGGAG	3	4
AAGCCCACCTTGCAAGGGGAG	412	494
AAGCCCACCTTGCAAGGGGCG	7	1
AAGCCCACCTTGCAAGGGGGG	6	2
AAGCCCATTGTCGTCGTCGC	2	5
AAGCCCCAGACCAGTACTGC	4	9
AAGCCCCAGCTTAGAGCATG	0	4
AAGCCCCCTGCTTTAGCCGT	4	0
AAGCCCCTCCCCTGACATGT	5	2
AAGCCCCTTCTCCAAGCCGC	0	6
AAGCCCGTTTGGTCCGCGGT	2	5
AAGCCCTCTCGAGGCCGGCA	5	13
AAGCCCTGGCTGGTGGGTCT	0	5
AAGCCCTGGGTCTGGGATGG	0	5
AAGCCCTTCCCACTGCGCTT	0	6
AAGCCCTTGGTGACAGGTGG	4	7
AAGCCGAGGCTGGCTGGGCG	5	6
AAGCCGAGTGGCACAGCCGG	8	5
AAGCCGCCCTAGCAATGCGT	7	0
AAGCCGGCAGCATGGGTGGG	11	10
AAGCCGGCAGCATGGGTGGGG	3	9
AAGCCGGGCGTGGTGGTGC	9	1
AAGCCGGGGAGGGCAGTTG	297	259
AAGCCGGTCACTGGTGATGC	19	11
AAGCCGTGGCCGCAGGTTCC	5	7
AAGCCGTTAACCGCCTGTCC	9	1
AAGCCTAGCATGCTCGATGAC	0	5
AAGCCTATGGTCTTCTATGT	0	6
AAGCCTGAAGGTTAGGAGGA	0	4
AAGCCTGGAAGCTGGAGGAG	247	163
AAGCCTGGAAGCTGGAGGCG	4	1
AAGCCTGGCTTGGAGCAGCT	4	0
AAGCCTGTCAGAGGGTCAGC	8	12
AAGCCTTTCCCTGGAAGTGT	71	38
AAGCGACGGACTCGGCTCGC	3	14
AAGCGAGACTCCCTGGGCGT	6	2
AAGCGAGATGGCTGGTGGCT	2	4
AAGCGAGCAAGCAGCAGTTCG	249	117
AAGCGAGCAAGCAGCGGTTCG	6	0
AAGCGAGGCCGAGGCGGGCA	1766	1656
AAGCGAGGCCGAGGCGGGCC	21	2
AAGCGAGGCCGAGGCGGGCG	9	1
AAGCGAGGCCGAGGCGGGCT	9	0
AAGCGAGGCCGAGGTGGGCA	2	6
AAGCGAGGCCGGGGCGGGCA	11	3
AAGCGATCCACTTGGTTGCC	1	5
AAGCGATGGCCGACGGCAGC	9	4
AAGCGCAAAGGCCCTGTGGC	3	6
AAGCGCCCTCGCCGATGTGC	0	4
AAGCGCCTTAACAGGGTGAG	7	0
AAGCGCGGCCCAGCACTGCT	174	388
AAGCGCGGTCCGTTCGCCGC	12	22
AAGCGCTCTAACAGGGTGAG	5	0
AAGCGCTGCATCCCGTTGGG	7	11
AAGCGCTTGAACAGGGTGAG	4	1
AAGCGCTTTAACAGGGGGAG	7	4
AAGCGCTTTAACAGGGTGAG	907	737
AAGCGCTTTAACAGGGTGCG	6	0
AAGCGCTTTAACAGGGTGGG	5	0
AAGCGCTTTAGCAGGGTGAG	6	1
AAGCGGAACCTGTAGGAACG	0	4
AAGCGGACTGCTGGAATGCC	2	4
AAGCGGATCGAGCGTGTTGC	7	6
AAGCGGCAGCCCTCAGACGT	0	8
AAGCGGCGCTGCACCAGGTC	6	1
AAGCGGGACAGCGCTTCGCC	10	10
AAGCGGGAGCAGCCCAGTGG	1	5
AAGCGGGAGGCAGGACTCGC	6	6
AAGCGGGCCGCTGAGGATTG	4	0
AAGCGGGCTGCTGAGGATTA	6	0
AAGCGGGCTGCTGAGGATTG	313	192
AAGCGGGGCCGAGGCGGGCA	6	7
AAGCGGGTGTGGCGCGTG	7	5
AAGCGGGTGTGGCGCGTGGG	9	13
AAGCGGTGCTCCTCCGCGC	9	4
AAGCGGTGGTGCCCGGGCCT	102	18
AAGCGTAGTGCTTGAGAGC	0	4
AAGCGTATCGCGAGCTGGACC	0	6
AAGCGTGGCCCCCCAGCTGT	2	4
AAGCTAAGCAGATGGCACGGT	3	9
AAGCTACAAGCGGCTTCCGT	5	4
AAGCTCAGCACGTGCGAATG	4	6
AAGCTGAGCAGTATTGGGGG	0	4
AAGCTGAGTTGGTGTTAGCT	4	12
AAGCTGCACGTCGGAGTCGC	0	6
AAGCTGCAGAGCTGAAGCCT	1	7
AAGCTGCCTGGCTGGCTGGC	9	6
AAGCTGGACGCGGGGCAGAGG	17	20
AAGCTGGAGTGCAGTGGCGT	0	4
AAGCTGGCGCTCAGCTGGT	6	4
AAGCTGGCGCTCAGCTGGTG	3	10
AAGCTGGGACCAGGTGTGT	4	4
AAGCTGGGCGGGAGGCAGG	4	0
AAGCTGTCCTGCTGCTGTCC	4	2
AAGCTGTCGGCGGTGCTCGA	266	276
AAGCTGTCGGCGGTGCTCGC	4	1
AAGCTGTCGGCGGTGCTCGG	5	1
AAGCTGTGCATTCAGGGCT	0	9
AAGCTGTGTCACATCCCAGC	475	375
AAGCTGTGTCACATCCCAGG	0	6
AAGCTGTGTGGCCCGCAGCC	4	1
AAGGAAAGGCTGGAATGTG	1	9
AAGGAAAGGGATGCTGGGCG	0	4
AAGGAAAGTCAGGCACAGCTC	3	9
AAGGAAATGCCCCGGGTCCC	5	6
AAGGAACAGCACGTGGGCTC	7	8
AAGGAACCCAGACATCCTCT	7	2
AAGGAACGTGCCGGCAGGAC	5	2
AAGGAAGCCGACCTCAACGC	0	4
AAGGAAGCCGCCCGCAGACC	202	186
AAGGAAGCGGCGGCTGAGTC	0	4
AAGGAAGCGTCTTCCCCACC	3	5
AAGGAAGCGTCTTCTCCACC	925	823
AAGGAAGCGTCTTCTCCCCC	5	0
AAGGAAGGAGTGCAGGGCGG	5	0
AAGGAAGGCAGCGGCGTGCA	3	8
AAGGAAGGCAGGGCAGGGCC	3	7
AAGGAAGGCCACTGGGCAGG	66	122
AAGGAAGGCCTCTAAGTGCA	2	22
AAGGAAGGCCTCTGAGGGCA	3	4
AAGGAAGGCCTCTGAGTACA	1	4
AAGGAAGGCCTCTGAGTGCA	752	784
AAGGAAGGCCTCTGAGTGCC	5	1
AAGGAAGGCCTCTGAGTGCG	8	0
AAGGAAGGGAAGCGTGGTG	0	4
AAGGAAGGGGAGGTGCAGGG	11	2
AAGGAAGGGTGGCTGCGTCC	4	4
AAGGAAGGGTTTTGGTATGC	0	4
AAGGAAGGTTGGGGAGGCGG	5	3
AAGGAAGTTGGGGCAGCCAG	1	5
AAGGACAAACAGCCCACAGC	4	0
AAGGACACACAGATGCGGCG	6	8
AAGGACACACAGCCCACAGC	719	664
AAGGACACACAGCCCACCGC	4	0
AAGGACACAGGCCTTTCAGC	4	4
AAGGACAGACATGGCATCCC	1	4
AAGGACAGCAGGTGGCCTGC	6	3
AAGGACAGCATGTGGTCGTC	6	13
AAGGACATGGATGGAGCTG	4	0
AAGGACCAAGGACTGTGCCC	12	3
AAGGACCAGCGTTGCCCGCC	3	9
AAGGACCCTCACTGTGGCCC	0	6
AAGGACGCAAGAAAGGAAAA	13	27
AAGGACGCAAGAAAGGGAAA	324	481
AAGGACGCAAGAAAGGGAAG	7	0
AAGGACGGAAGTAAACTGTG	16	0
AAGGACGTAGCGCTGGTCGG	238	83
AAGGACGTCGCCGTGCCCGG	8	22
AAGGACTACACCGGGGCTTC	4	1
AAGGACTAGCCTCTTCCCAG	0	4
AAGGACTCAGCCGCGGCTGC	3	5
AAGGACTCAGGAAGCAAG	8	3
AAGGACTCGTGGTGCCCCAG	9	0
AAGGACTGCACACCAAGCTG	12	6
AAGGACTGCACCGGGGCCTC	6	3
AAGGACTGCACCGGGGCGTC	4	2
AAGGACTGCACCGGGGCTTC	816	769
AAGGACTGCTAACCCAGTGC	4	12
AAGGACTGGGGCAGGCAGCCC	2	9
AAGGACTGTTGTTGGATGG	6	4
AAGGAGAAGCAGGCTGCAGC	8	3
AAGGAGAATGGCGTGAACCT	7	0
AAGGAGACGACGGTCAGG	0	4
AAGGAGAGACTGGAATGTG	2	4
AAGGAGAGGCCGGAATGTG	5	1
AAGGAGAGGCGGGAATGTG	5	5
AAGGAGAGGCTGAAATGTG	2	8
AAGGAGAGGCTGGAACGTG	5	4
AAGGAGAGGCTGGAAGGTG	2	7
AAGGAGAGGCTGGAATGCG	8	1
AAGGAGAGGCTGGAATGGG	12	5
AAGGAGAGGCTGGAATGTG	1961	1878
AAGGAGAGGCTGGGATGTG	4	4
AAGGAGATGGTGGTGGCTT	6	11
AAGGAGCACAAGATCATGGC	9	5
AAGGAGCACAAGATCATGGG	6	2
AAGGAGCACAAGATCATGGT	732	841
AAGGAGCACAAGATCGTGGT	7	2
AAGGAGCACAGCGAGGAAGGG	94	79
AAGGAGCAGGTGCATGAAGG	0	6
AAGGAGCCAGGCCGCGCAGC	2	4
AAGGAGCGGCTGGAATGTG	4	0
AAGGAGCTGTGAACCTGTGCC	7	8
AAGGAGGACACTGTGCAGG	5	11
AAGGAGGACTGGTGAGTGAG	0	12
AAGGAGGCCAACTGTGCCAG	4	2
AAGGAGGCCGCGCTGGGCAG	4	2
AAGGAGGCGTCTTCTCCACC	5	3
AAGGAGGGGATGGGCGAG	6	3
AAGGAGGGGATGGGCGAT	955	959
AAGGAGGGGATGGGTGAT	5	2
AAGGAGGGGCTGGAATGTG	1	6
AAGGAGGGTTGTGAGGTGA	6	2
AAGGAGTCAAGTTCGGGTGT	0	8
AAGGAGTCGAGGTCGTTGG	11	2
AAGGAGTGGAGGTAGGTGT	4	5
AAGGAGTGGCTGGAATGTG	5	0
AAGGAGTTCAGATCAGGACA	7	2
AAGGAGTTCGAGACCAGCCT	3	7
AAGGAGTTCGCGACCAGCCT	5	1
AAGGAGTTGTGACTGGGCTG	13	13
AAGGATCCCGCCGTCCGCCT	0	4
AAGGATGGCTTGACCCCATT	0	19
AAGGATGTGGCGCTGAACGT	4	7
AAGGATGTGGCTGGGAGGCT	5	2
AAGGATTCCATGACTGGGCG	4	2
AAGGCAAAGCCGCCAGGTCT	9	1
AAGGCAAAGCTGCCAGGACT	4	0
AAGGCAAAGCTGCCAGGCCT	5	1
AAGGCAAAGCTGCCAGGGC	0	22
AAGGCAAAGCTGCCAGGGCT	13	4
AAGGCAAAGCTGCCAGGTC	8	0
AAGGCAAAGCTGCCAGGTCA	0	9
AAGGCAAAGCTGCCAGGTCC	12	0
AAGGCAAAGCTGCCAGGTCG	12	5
AAGGCAAAGCTGCCAGGTCT	1433	1352
AAGGCAAAGCTGCCGGGTCT	1	7
AAGGCAACAATCTCGTATG	159	102
AAGGCAACGAAGCGAGGCTG	8	2
AAGGCAACGCTGCTTGGCCT	0	8
AAGGCAACGTAGGCCGGGCA	2	5
AAGGCAAGCTGCCTGAGAGG	6	1
AAGGCAAGGCTGCCAGGTCT	7	0
AAGGCAAGTGACTGTGTGA	7	6
AAGGCAATGAAGTCGGTCGC	11	16
AAGGCACAAGGCCAGGCTG	40	40
AAGGCACAGCCTTCGGATTGT	2	4
AAGGCACAGCTCAGCAGCTG	6	6
AAGGCACCACCACATGAGGG	2	4
AAGGCACCACGGGGGAGGGA	0	4
AAGGCACCAGGTGGCGTGGC	19	22
AAGGCACCCTATACAGGCGC	1	4
AAGGCACCCTATGCAGGCGC	12	5
AAGGCACCTGCCAAGTCAGT	3	4
AAGGCACGCGCCACTATGCC	6	2
AAGGCACGCTGCAACTTGTG	9	1
AAGGCACGCTGCAACTTGTGG	10	10
AAGGCACGGATGAGGAGCAG	9	7
AAGGCACGGGCAGGCCCTG	1	5
AAGGCACGGGCAGGCCCTGC	13	16
AAGGCACTGTGCATGATGCCA	0	4
AAGGCAGAGCTGCCAGGTCT	6	1
AAGGCAGAGGGAGGGATGAA	0	44
AAGGCAGAGGGAGGGATGGA	246	80
AAGGCAGAGGGAGGGATGGG	4	0
AAGGCAGATCACCTGAGGCC	4	0
AAGGCAGATTGATGGTTGCC	5	8
AAGGCAGCAGCCCCAGTCAG	4	0
AAGGCAGCCCCCTCTAGCGG	5	3
AAGGCAGCCTGGAAGGAAACG	0	21
AAGGCAGCCTGGAAGGAAGC	478	445
AAGGCAGCCTGGAGGGAAGC	1	5
AAGGCAGCGATCGTACTGCA	122	79
AAGGCAGGCACTCCAGGCAC	81	60
AAGGCAGGCACTGAGGACCT	5	5
AAGGCAGGCAGGCCTCACAG	18	0
AAGGCAGGCAGGCCTCCCAG	744	420
AAGGCAGGCAGGCCTCCCCG	5	1
AAGGCAGGCCTGGAGGCAT	4	3
AAGGCAGGCGCCACCATGCA	6	2
AAGGCAGGCGGGTGGGGCAA	5	10
AAGGCAGGGAGGGGTAATGT	8	2
AAGGCAGGGAGGGGTGACGT	6	0
AAGGCAGGGAGGGGTGATGT	247	127
AAGGCAGGGAGGGGTGGT	2	5
AAGGCAGGGCAGGGCCAACC	4	7
AAGGCAGGGCATCTCGTGCT	11	9
AAGGCAGGTATGTCCAGGTG	0	6
AAGGCAGTAGGTGCTTGGT	3	7
AAGGCAGTCGCAGGCGGCGG	0	4
AAGGCAGTGGCCCCTTTCTCT	4	2
AAGGCAGTGGGATGGGGATG	6	10
AAGGCATACAGGTCGGGGC	2	4
AAGGCATCCACACGCAGGCC	4	3
AAGGCATCCAGCGGTGTCGC	2	12
AAGGCATCTGCCCTGTGTCC	4	7
AAGGCATGAGAGCTCTGCCC	5	0
AAGGCATGAGCCACCGTGCC	6	1
AAGGCATGCACCACGATGCC	22	9
AAGGCATTGGGCAGAGGCTG	9	14
AAGGCCACTAGGCATGCGC	1	4
AAGGCCACTGATCGCAGGCT	7	4
AAGGCCAGAAGGGGGATGGT	8	5
AAGGCCAGCGCCAGAGGGC	378	587
AAGGCCAGCTAGTCGCGGTT	6	10
AAGGCCAGCTGCAGTGGCTC	2	4
AAGGCCAGCTGTGTGAGGCC	2	5
AAGGCCAGGCAGTGGTGCC	2	4
AAGGCCAGGGGATGCGGCCG	0	6
AAGGCCAGGGGCAGGGCCA	5	2
AAGGCCAGGTGTGACCAGCC	10	13
AAGGCCATCATGTCTCATTT	0	4
AAGGCCATGCAGCTCCTGCC	2	4
AAGGCCATGTGGCTTGGTT	4	4
AAGGCCCAGGGATGTGGACA	7	9
AAGGCCCCAGACCCTGAAGG	0	5
AAGGCCCCAGGGCAGGTCG	7	9
AAGGCCCCAGGGCAGGTCGG	4	25
AAGGCCCGCAGGCAGCAGGC	5	4
AAGGCCCTAGCGTGGGTGGT	12	9
AAGGCCCTGGGCTCCCTGCT	5	5
AAGGCCGCCTTCTGCGCGG	10	16
AAGGCCGCCTTCTGCGCGGG	5	7
AAGGCCGGTGGGAGGTCTCC	30	64
AAGGCCGTCGATGGTGGGGC	4	6
AAGGCCGTGGGGTGGAGCGC	2	7
AAGGCCTCACTCTGTTGCCC	0	5
AAGGCCTCAGACGAGACTTG	6	8
AAGGCCTCCCAGCAGGTGGC	11	8
AAGGCCTCTTTGCACAGCC	1	4
AAGGCCTGCTCTGCGGGAAG	0	5
AAGGCCTGCTGTCTGCGCGC	8	4
AAGGCCTGGCCCGAGGCAGG	757	738
AAGGCCTGGCCCGAGGCGGG	4	0
AAGGCCTTAGCTCTGCGGAC	6	2
AAGGCCTTCAACCGCAGGTC	7	13
AAGGCCTTCCGCAAGGCTGC	4	2
AAGGCCTTGAGTGGTCAGC	4	2
AAGGCCTTGGAAGGCAAGCG	4	4
AAGGCGAAGCAGCGTAAGGC	0	10
AAGGCGAAGCTGCCAGGTCT	7	3
AAGGCGACGGAATGTGCTGC	3	4
AAGGCGAGGATGGGGAAGTC	2	4
AAGGCGAGTCCACGTGGCGT	27	24
AAGGCGAGTGGCGAAGGTGG	0	6
AAGGCGCCCAGGGGTGGTGC	6	2
AAGGCGCCGTCCAAGGGTGG	4	3
AAGGCGCTGACCGATGCGG	3	4
AAGGCGCTGACCGATGCGGT	5	6
AAGGCGGACCATCACGAGGTC	3	4
AAGGCGGCCGAGCCAGACCG	3	4
AAGGCGGGCTGATCACTGG	0	6
AAGGCGGTCGCCGGGCCAAT	4	1
AAGGCGGTCGGCAGCTGTGC	8	2
AAGGCGGTCGGCAGCTGTGG	4	4
AAGGCGGTCGGCAGCTGTGT	432	323
AAGGCGGTCGGCGGCTGTGT	1	5
AAGGCGTCCTACACCGCCGC	4	5
AAGGCGTGAGGCACCGCGCC	13	1
AAGGCGTGGGCTGAGGGTCC	3	4
AAGGCGTTAGTGCAATGCGC	3	4
AAGGCGTTCTCTGGAGCTGC	1	7
AAGGCGTTGCCTGCAGACC	5	3
AAGGCTAAGGGTCTTGTCCA	5	0
AAGGCTAGACAGGCAGGCAG	2	4
AAGGCTATCGCGCAGGGTGT	32	22
AAGGCTCCCTCCTCTGGGCT	0	4
AAGGCTCGCAGCGCTGGGG	1	5
AAGGCTGAGGGCCTTGTCCA	5	0
AAGGCTGAGGGTCCTGTCCA	4	2
AAGGCTGAGGGTCTTGCCCA	4	1
AAGGCTGAGGGTCTTGTCCA	948	769
AAGGCTGAGGGTCTTGTCCC	10	0
AAGGCTGAGGGTCTTGTCCG	7	1
AAGGCTGCACGGTGAGGGA	1	7
AAGGCTGCACGGTGAGGGAG	0	4
AAGGCTGCACTGTGGCCAGC	0	4
AAGGCTGCAGCCGGGCCTGG	70	7
AAGGCTGCAGGTGAGGGCTC	3	4
AAGGCTGCCAGGGCTGGCCA	1	4
AAGGCTGCCTCTGCTGCGAT	4	4
AAGGCTGCTGCGTCCTGGTG	100	16
AAGGCTGGCCCCTTGCCTCA	0	5
AAGGCTTCCCCACGGACGAG	22	34
AAGGCTTCGCACACCGACCA	6	0
AAGGCTTGCTTGGGAGCAA	1	6
AAGGGAAAAGACCACTGGCGA	0	5
AAGGGAAATCAGGCACAGCTC	5	1
AAGGGAACAACACGTTCTGT	8	1
AAGGGAAGCATGCGCCACGT	8	4
AAGGGAAGCCAGGCACAGCTC	7	11
AAGGGAAGGCAGGCACAGCTC	4	1
AAGGGAAGTCAGACACAGCTC	4	2
AAGGGAAGTCAGGCACAACTC	4	3
AAGGGAAGTCAGGCACACCTC	4	14
AAGGGAAGTCAGGCACAGCAC	4	4
AAGGGAAGTCAGGCACAGCCC	17	14
AAGGGAAGTCAGGCACAGCGC	21	15
AAGGGAAGTCAGGCACAGCTC	3125	2842
AAGGGAAGTCAGGCACAGCTT	8	1
AAGGGAAGTCAGGCACAGTTC	7	0
AAGGGAAGTCAGGCACGGCTC	11	3
AAGGGAAGTCAGGCATAGCTC	4	2
AAGGGAAGTCAGGCGCAGCTC	5	7
AAGGGAAGTCAGGTACAGCTC	5	0
AAGGGAAGTCCGGCACAGCTC	1	5
AAGGGAAGTCGGGCACAGCTC	7	3
AAGGGAAGTGCTCAGAGGG	0	5
AAGGGACACTCGCGGCGGCC	1	4
AAGGGACAGCCCTTGGCAT	11	9
AAGGGACAGGGTGGGGCAGC	6	7
AAGGGACAGGTATGTGGCCA	5	5
AAGGGACGGAGGGCCGAGGC	84	91
AAGGGACGTAGCTGGATCAT	5	3
AAGGGACGTCCATCTGGCCG	3	4
AAGGGACGTGAGCCCAGCCG	0	6
AAGGGACTAGCCCTGCTCTG	5	0
AAGGGACTCAACCAGGAGCC	4	5
AAGGGACTCGGCCCTCGAG	0	4
AAGGGACTGCCTGTTGAGCC	4	8
AAGGGACTGGAGACAGAGCAG	0	4
AAGGGACTGTGGGACAGTG	9	0
AAGGGAGAAGGCGCGATCT	4	1
AAGGGAGAGGCACATCGCCC	3	4
AAGGGAGCAAGGCCAACGCT	11	9
AAGGGAGCGAGCGTGGCGG	217	235
AAGGGAGCGCGCACGTGGC	5	6
AAGGGAGCGCGCACGTGGCG	8	4
AAGGGAGCTGTGCAGGGTGC	3	9
AAGGGAGGAGCCTGGGGGC	0	4
AAGGGAGGCTGGGGCATGA	6	3
AAGGGAGGGCGTGGCTTTGC	3	4
AAGGGAGGGTGAGCATCAG	2	7
AAGGGAGGTCAGGCACAGCTC	8	11
AAGGGATCCACTCAGTTGGT	0	4
AAGGGATCCCCTGATCCGT	7	5
AAGGGATCCTTCACACTGT	4	3
AAGGGATCGTGATGTCCCAC	3	5
AAGGGATCGTGTAGCAGCCC	4	1
AAGGGATCTAGGGCTGTGCA	132	194
AAGGGATGCAGAGGCGTAAG	572	732
AAGGGATGCAGAGGCGTACG	4	1
AAGGGATGCAGGGGCGTAAG	1	4
AAGGGATGCGGAGGCGTAAG	5	4
AAGGGATGCTGGCCAGGGCC	3	4
AAGGGATGGCCGACGGCAGC	4	3
AAGGGATGGGGATGGCAGGT	164	71
AAGGGATGTGGCTGACGTG	0	7
AAGGGCAAGGACGCACCGC	6	5
AAGGGCAATACCCAAGTGCC	4	5
AAGGGCACACAGCCCACAGC	4	0
AAGGGCACAGGAACAAAGGG	20	17
AAGGGCACCCCGCTGCACCT	8	5
AAGGGCAGAGGCAGAGGCGG	4	2
AAGGGCAGGACCATCCTCCC	9	2
AAGGGCAGGCATGAAACTGC	144	55
AAGGGCAGGGCAATGGTGC	4	0
AAGGGCATCACCTTCGACTC	6	4
AAGGGCATCAGAGGGTGCTG	1	5
AAGGGCCAGAAGGGCGAGCC	14	7
AAGGGCCAGAGGCGCAAAGG	242	202
AAGGGCCCAATGGACAACGT	6	1
AAGGGCCCAGGTGAGGGGCA	2	5
AAGGGCCCCTGTGTTGACCG	0	4
AAGGGCCCTCTGCAGCCAC	5	1
AAGGGCCTAGGTGGTGCAG	6	5
AAGGGCCTCAAACTGGTCTC	3	6
AAGGGCCTCGGTGCGCCGG	5	0
AAGGGCCTCGGTGCGCCGGT	1	7
AAGGGCCTGGCTCAGGGCGA	8	10
AAGGGCCTGGGCTGGTTCGG	5	0
AAGGGCCTGTTAGGAGGTGG	4	5
AAGGGCGCGAAACGGACCTC	5	0
AAGGGCGCGCAGCGAAGTGT	4	4
AAGGGCGTTTGGTAAGGCCA	4	6
AAGGGCTACCAGGGATTCCC	1	6
AAGGGCTCCACGGCCGGGGC	2	4
AAGGGCTCGCTGGCTGGGCT	7	7
AAGGGCTGAGGGTGGGAG	4	2
AAGGGCTGGAAGGAGGGTCT	3	4
AAGGGCTGGAAGGAGGTTCC	6	1
AAGGGCTGGAAGGAGGTTCT	761	486
AAGGGCTGGGCCTGCAGGCG	5	9
AAGGGCTTGCAGCAGTGGAG	0	4
AAGGGCTTGGGGCCGGGCA	3	6
AAGGGCTTGTGCACGTCCCCG	1	4
AAGGGGAAGCAGCGACTCC	4	3
AAGGGGAAGGAAGCAGGCA	6	4
AAGGGGAAGGCACCCGGCGG	7	12
AAGGGGACAATCTGAGGTGA	0	6
AAGGGGACCTGCGAGGCTG	0	8
AAGGGGACGAGCGGGTGGC	5	9
AAGGGGAGGAGGTGGAGGGT	4	0
AAGGGGAGGCCCTGTACCCT	10	8
AAGGGGAGGCGCGGAGGAGA	0	13
AAGGGGAGGCTGGAATGTG	8	6
AAGGGGAGTCAGGCACAGCTC	6	9
AAGGGGATGTGGCCAGCAGG	5	7
AAGGGGCACAAGATCATGGT	5	0
AAGGGGCAGCTTCCGCCGG	4	3
AAGGGGCATGCCATCATGCC	1	7
AAGGGGCCAGGGTGGGCCT	0	7
AAGGGGCGGCGTCCAGATCC	0	4
AAGGGGCTACAATTTGAGAAA	9	0
AAGGGGCTGCAACTTGAGAAA	6	2
AAGGGGCTGCAATTTAAGAAA	6	0
AAGGGGCTGCAATTTGAGAAA	614	713
AAGGGGCTGCAATTTGAGCAA	5	2
AAGGGGCTGCAATTTGAGGAA	1	4
AAGGGGCTGCTGATGGCGG	2	5
AAGGGGCTGCTTGGCTCCTG	5	11
AAGGGGGAGACGGGGGTGG	0	5
AAGGGGGAGTGTGGCGGGGC	0	5
AAGGGGGCAATGCAACCACC	5	0
AAGGGGGCAATGCAGCCACC	472	529
AAGGGGGCAATGCAGCCACT	4	1
AAGGGGGCACTGCAGACGTG	4	9
AAGGGGGCGCCGTGGCGT	19	25
AAGGGGGCGCCGTGGCGTGC	11	13
AAGGGGTAGTCGGTTGGGT	4	2
AAGGGGTATGCATGGGTGT	1	4
AAGGGGTCGCCCGTGGCACT	0	9
AAGGGGTCGCGGCGCGGTGC	9	10
AAGGGGTCGGCTGGCCGCAG	5	1
AAGGGGTGCCTGTGTCCGTA	3	5
AAGGGGTGTGGCCAGGGT	0	10
AAGGGGTTCAGCATCCTGCA	5	1
AAGGGGTTGCAGGGTGAG	3	4
AAGGGGTTTGAGAAAATGGT	2	4
AAGGGTACAAGGCAGGTGG	10	6
AAGGGTCCCGAGTGTGAGGT	8	8
AAGGGTCGTGGGTGACTGGC	2	6
AAGGGTGAAGGATGGGCG	1	4
AAGGGTGAGAAGCACGGCCG	0	7
AAGGGTGCCTGGCTGATTGA	5	5
AAGGGTGCTCACTCCAGGCC	4	5
AAGGGTGTGGCCGGGCGT	1	6
AAGGGTTTACCATGTTGGTC	0	6
AAGGTAACGGCAGCGGGGCG	3	4
AAGGTAATGCCCTTAGGTGT	0	4
AAGGTAATGGCAGCCTGCCG	5	6
AAGGTACCGACACTTGCCG	0	5
AAGGTAGCTTGTGGGATGC	0	4
AAGGTAGGCAGCAGCATCGG	4	8
AAGGTAGGCGGATCACTT	0	6
AAGGTCACTACCCAGGGAAC	6	1
AAGGTCAGCCACCAAAGACT	4	10
AAGGTCAGCGCGATGCACCT	6	3
AAGGTCAGTTGGGGCAGGGG	1	6
AAGGTCATCGTTTTTGCGG	6	3
AAGGTCCCAGGCCGGGACGG	86	61
AAGGTCCCTGAGCCACGCCA	2	6
AAGGTCCTGCCGGCAGCCA	4	15
AAGGTCGATGGCCAGCGCG	4	7
AAGGTCGATGGCCAGCGCGG	1	4
AAGGTCGCTGAGCCGTGCC	7	5
AAGGTCTCAATCTGTGGCCG	0	7
AAGGTCTCACCGTGTTGCCC	4	0
AAGGTCTCACTCTGTTGCCC	4	0
AAGGTCTCGCTTTGTCTCCC	7	0
AAGGTCTTGCTCCGTCACCC	11	0
AAGGTCTTGGCAGGGTGCG	4	1
AAGGTGCCAAGGACCAATCC	6	3
AAGGTGGCGGCAGCGCTGCA	5	6
AAGGTTAGGTTAGGAATGAC	0	4
AAGGTTTCACCTCGTTGGCC	0	9
AAGGTTTCGAGGCATGGCAT	4	0
AAGGTTTTGTGCATGGCTG	0	8
AAGTACGACACAGAGCGAGT	6	3
AAGTACGACACAGAGGGAGT	9	4
AAGTACGACACAGAGTAAGT	4	0
AAGTACGACACAGAGTGAGC	5	2
AAGTACGACACAGAGTGAGG	15	3
AAGTACGACACAGAGTGAGT	880	594
AAGTACGACACAGAGTGGGT	4	3
AAGTACGACACGGAGTGAGT	3	4
AAGTACGACGCAGAGTGAGT	4	1
AAGTATAAGAGTGGACCTGC	5	10
AAGTATGCATACTGGGTGGA	4	4
AAGTATGTGGGGGAGGGAG	331	279
AAGTATGTGGGGGAGGGCG	5	0
AAGTATGTGGGGGAGGGGG	2	4
AAGTCACCGCTCCAGTGACT	6	2
AAGTCAGGGGCCGCACGGTC	4	0
AAGTCATGCTGGCTGGGGCC	4	4
AAGTCCCAAGCCACACAGCC	4	1
AAGTCCCCGGACCGACCTC	7	6
AAGTCGCTGCGCATCGACGG	7	5
AAGTCGTAGGGCAGGGACGG	4	1
AAGTCTCTGGGACATCCCTG	0	5
AAGTCTTGCTCTGTCACCCA	0	5
AAGTGAAGGGCCGGAGATCT	0	4
AAGTGACCTGACGAGGACAC	5	0
AAGTGAGCACGCAGATTCCT	183	100
AAGTGAGCAGCGGGCCGTGT	177	156
AAGTGAGGCAGGCAGGGCCC	7	4
AAGTGAGTGGTGGTGCCACT	9	0
AAGTGATAGCCGACGGCAGC	1	4
AAGTGATGACCGACGGCAGC	5	0
AAGTGATGGCATCCCTGGGC	5	0
AAGTGATGGCCGACGGCAAC	0	6
AAGTGATGGCCGACGGCAGC	1224	1087
AAGTGATGGCCGGCGGCAGC	4	1
AAGTGCAGGACCGTGTGGGC	3	4
AAGTGCCCAGCGAGTAGGGT	0	6
AAGTGCGACATCATCGCCGA	0	6
AAGTGCTCCGGACGTCTGGG	3	6
AAGTGGCAGTGGCGTTGGCG	59	163
AAGTGGCATGCCGAAGGGAG	3	8
AAGTGGCATGCCGAAGGTAG	789	518
AAGTGGCGTGCCGAAGGTAG	1	5
AAGTGGGGCAGCCCGAGAGA	124	86
AAGTGTAATTGCTGATTGGT	1	5
AAGTGTTCACGCATGGCGGC	8	16
AAGTTGCGGAGGGTGGGAGC	508	457
AAGTTGCGGAGGGTGGGGGC	4	3
AAGTTGCGGAGGGTTGGAACT	0	16
AAGTTGGAGGCGGCGGGAAG	11	0
AAGTTGGTGAGTGTTTGGT	0	4
AAGTTTGGGGGCGGACGAG	0	4
AATACCCACGCGTGGCCACC	2	8
AATACCGTGAGTTGGAGGCA	9	0
AATACGGACGCCCCGGGACG	7	0
AATACTGAGGCATCAGGGAGG	5	1
AATACTTGGTCGAGAAGCAT	0	6
AATAGACCAGACTGAGCTAT	8	0
AATAGACTGAGTCTCAGGTCT	0	4
AATAGAGGAGGCCAGTGAGG	303	199
AATAGGTCCTAGGACGGGAG	4	4
AATAGTGCGGTGGGTGCGG	8	10
AATAGTGCGGTGGGTGCGGG	3	4
AATATAACCGCAAGGGGCAG	2	5
AATATGGCTGCAGTGGTCAC	0	4
AATCAAACTTCATGGTTGTC	0	5
AATCAACCCCGCCCGGCCC	4	3
AATCAAGCCTGGGCAATGGC	6	1
AATCAAGCGAACAGGGAATG	6	3
AATCAAGTCAGCCTTGCTGC	1	6
AATCAATCGGCCAACGCGCG	5	3
AATCACGGTCAGCACGGTGG	2	7
AATCACTCAGTGCATAGCAG	0	5
AATCACTTGAACCTGGGAGG	6	0
AATCACTTGACCCCAGGAGG	8	0
AATCACTTGAGCCTAGGAGG	4	5
AATCACTTGAGTCAGGGAGG	0	6
AATCAGAGCGTGGGTGGAGGG	0	17
AATCAGCACTCCTGGCTCAC	5	0
AATCAGCCAGGCGTGGTGGC	16	1
AATCAGCTGGGCGTGGTGGT	5	0
AATCAGGTGTGCTGGGACCT	12	12
AATCAGTCTTGTCGAACAGG	137	77
AATCAGTGCCACGGAGCAGG	598	369
AATCAGTGCCACGGGGCAGG	4	0
AATCAGTGGACTTGGCGGCAG	2	4
AATCAGTGGGTGCTGAGGAC	3	5
AATCATGGGGGCAGAGGGGC	8	4
AATCCACGAGGGGCAGCCCC	6	2
AATCCACGAGTGGCAGCCCC	701	705
AATCCACGAGTGGCAGCCCT	4	2
AATCCACTCTCTGGCAGTGC	0	6
AATCCAGGCAGCTGGTTCCT	4	7
AATCCATGTTGCTAGGTGCT	5	7
AATCCCAGCATTTTGGGCCA	1	6
AATCCCCAGGTGTGAAGGGT	3	5
AATCCCCGCCGATTAGCGCC	235	261
AATCCCCGCCGATTAGCTCC	100	97
AATCCCCTCAGCCTCAGTGT	6	0
AATCCGGTCAACGGTGTGTG	4	5
AATCCTCCTAACACTGTTCC	7	9
AATCCTCGGTGCGATGGCCG	5	4
AATCCTCGGTGCGATGGCCGT	7	6
AATCGCAGAGAGTGGTGAGT	0	12
AATCGCCAGCCGCCACTGCC	0	6
AATCGCCAGCTGAAGCCGCG	4	3
AATCGCCCCTCCTGCGGCAG	511	410
AATCGCCCCTCCTGCGGCCG	6	1
AATCGCCCCTCCTGCGGCGG	8	0
AATCGCCGGAACCTGGGAGG	5	0
AATCGCGCGATGGTCGAGGC	9	17
AATCGCGTTCGAGTCCGGGC	3	11
AATCGCTCCACACGAGTGCT	1	5
AATCGCTCGAGGCAGGGAGG	4	2
AATCGCTCGAGTCAGGGAGG	474	545
AATCGCTGAGAGAGGTGAGT	4	0
AATCGCTGAGAGCGGTGAGT	0	8
AATCGCTGAGAGGGGTGAGT	4	6
AATCGCTGAGAGTAGTGAGT	2	6
AATCGCTGAGAGTGGAGAGT	6	1
AATCGCTGAGAGTGGCGAGT	5	3
AATCGCTGAGAGTGGGGAGT	9	7
AATCGCTGAGAGTGGTAAGT	5	0
AATCGCTGAGAGTGGTGAGC	7	3
AATCGCTGAGAGTGGTGAGG	20	7
AATCGCTGAGAGTGGTGAGT	1002	989
AATCGCTGAGAGTGGTGGGT	2	4
AATCGCTGAGGGTGGTGAGT	5	2
AATCGCTGGAACCTGGGAGG	730	89
AATCGCTGGAACCTGGGAGT	7	0
AATCGGTGGCAGAGCCAGGA	63	45
AATCTATGCAGAGGCGGCCT	6	0
AATCTCCCAAGTCCGGCAGG	89	109
AATCTCGCTACTGCGTGTAA	6	0
AATCTCTGCACTGATCACCC	4	0
AATCTGCAGGACACTGGTGT	2	5
AATCTGGTGGCCAAAAACTG	2	8
AATCTGTCAAGAAGGGAGCT	0	6
AATCTTGGCTGGACTGCACT	4	0
AATCTTTCAGCAGGAAGCGG	1	10
AATGAAACCACGGTCACCC	264	255
AATGAACATGGCACCAAGCC	2	9
AATGACCAAGGGAGCTGGCC	0	7
AATGACCACTGCAGCCAGCG	5	1
AATGACCAGGAGGGGGCAT	0	4
AATGACTCCGGGCCTGGCAG	196	214
AATGACTGCTACATAGACCT	4	5
AATGACTGCTTGCCAGGGAG	5	7
AATGAGACTCCGAGGGGACG	156	172
AATGAGAGGGGTCCCTGCCA	9	3
AATGAGCACCTCGACGGCGT	2	8
AATGAGCAGAGCTAGGGGGT	2	6
AATGAGCAGAGTCAAAATCG	0	8
AATGAGCCAGGCCTGGTGGC	42	35
AATGAGCCTGCAGTCTGGGG	5	1
AATGAGCCTGCAGTCTGGTG	571	729
AATGAGCCTGCGGTCTGGTG	3	4
AATGAGGAGGCGAGAAGGAA	10	0
AATGAGGCTCCGAGGGGACG	5	0
AATGAGGTCGCACAGATGGT	5	0
AATGAGTGAAGGGCCTGAG	1	4
AATGATACGGCGACCACACC	6	12
AATGATGCAAGGGGATCTCA	0	4
AATGCAGGTGAGTGGAGGTG	7	4
AATGCAGTCGCTGGCACGAG	2	5
AATGCATCTGCCGCACATCT	4	6
AATGCATTGTTGTGGGGAAA	0	6
AATGCCAGGTACTCCACGCC	3	4
AATGCCCTCACCTGCTCGGA	7	2
AATGCCGTCATCGTGGGCGA	0	9
AATGCCTCTCGCCTGCGGCA	0	5
AATGCCTGGCAGCAATGTGT	5	4
AATGCCTGTCCCCTGCCACC	7	2
AATGCGCATCGGCCCGTTGC	0	8
AATGCGGCGAGCCTGAGAGC	331	380
AATGCGGCGAGCCTGAGGGC	6	0
AATGCGGCGGGCGGCAGCGC	4	4
AATGCTCAGTAATGCAGTGCC	4	8
AATGCTTCCAGGCGCGAGC	227	305
AATGCTTTGCAGGCAGGGGG	1	5
AATGGAAGGTGAGTGTGGG	4	1
AATGGAATCAACGCGAGTGC	42	0
AATGGAATCAACGCGAGTTC	0	10
AATGGAGAGCTTGCGGGTA	0	6
AATGGCCCCAAGCCGGTTGC	6	12
AATGGCCCGACTGGTGAGTG	4	3
AATGGCCCGACTGTTGAGCG	2	5
AATGGCCCGACTGTTGAGGG	15	10
AATGGCCCGACTGTTGAGTG	724	684
AATGGCCTGACTGTTGAGTG	0	4
AATGGCGTAGTGACTCGTGT	4	0
AATGGCGTGAATCTGGGAGG	5	0
AATGGCGTGAGCTCACCTGTG	7	7
AATGGCTCTGCACCAACTGC	226	151
AATGGCTCTGCACCAACTGT	13	0
AATGGCTGAACAGGGAGTTG	1	10
AATGGCTGAACCTAGACCTG	2	4
AATGGGCAGAGGAGGGGTGG	5	4
AATGGGCAGGGGGCACCCGA	22	39
AATGGGCGCTGGCAGGGCGT	8	4
AATGGGCGGTGACTGCTGAT	4	7
AATGGGTCGTCGCCGCCAC	6	0
AATGGGTCGTCGCCGCCACG	7	0
AATGGTCACAGCGATGGCAA	5	4
AATGGTGCAGCCTGAGTTG	10	5
AATGGTGTGAACTTGGGAG	5	2
AATGGTGTTCCTGTACTGC	0	5
AATGGTTTTGGCCGGGTGCA	4	2
AATGTCCGTAGCTGCCAGCAG	5	0
AATGTGGCGAGCCTGAGAGC	4	0
AATGTGTCGTGGGCGCCCGT	5	5
AATGTTCCAGCCGGTCTCGG	6	2
AATTAACTGGGCATGGTGGC	6	0
AATTAAGTCTGTGCCGGTAT	0	4
AATTACCTGGGTGGAGGACA	1	12
AATTACTGAACGGGAAGTTG	0	4
AATTAGCAGGGCATGGTGGT	0	5
AATTAGCCAAGCCTGGTGGT	3	7
AATTAGCCAGGCATGGTGGC	12	0
AATTAGCCAGGCATGGTGGT	6	0
AATTAGCCAGGCGTGACGGC	1	4
AATTAGCCAGGCGTGGTGGC	5	0
AATTAGCCGAGCATGGTGGC	4	0
AATTAGCCGGGCGTGGTGGC	11	0
AATTAGCCGGGCGTGGTGGT	6	0
AATTAGCTGGGCATGGTGG	7	0
AATTAGCTGGGCCTGGTGGC	5	1
AATTAGCTGGGCGGGGTGG	4	0
AATTAGCTGGGCGTGGTGG	337	55
AATTAGCTGGGCGTGGTGGC	6	0
AATTAGGTAGGGTGCGTGT	2	4
AATTAGTGAAGGAGGCAATG	4	0
AATTAGTGAGGTGTGGTGGT	6	1
AATTAGTGGAGGAGGCAATG	9	2
AATTAGTGGCCAGGTGCAGT	8	8
AATTAGTTGGGCGTGGTGGC	9	2
AATTCCGTCACCATGGCGAT	4	2
AATTCTTCTTGGCTACTCGGC	4	2
AATTGACCGGTGACTTGTCCT	2	6
AATTGAGTGCCAGTGTTTT	9	0
AATTGCTGAACGGAAAGTTG	12	1
AATTGCTGAACGGGAAGGTG	4	8
AATTGCTGAACGGGAAGTGG	2	4
AATTGCTGAACGGGAAGTTA	5	1
AATTGCTGAACGGGAAGTTG	805	739
AATTGCTTCTTTCAGGGGCT	0	7
AATTGCTTGAACCTGGGCAG	8	0
AATTGCTTGAATCTGGGAGG	5	0
AATTGGAATGCGCCGCCACC	5	11
AATTGGAGCTGGAAAGTGGT	4	0
AATTGGAGCTGGAGAGTGGT	5	1
AATTGGATTAAGAAGGATGG	0	4
AATTTACCAACACCAGTGGC	0	5
ACAAAAACGGGTGCATAGCC	0	5
ACAAAACCCACTCGGCGAGG	4	4
ACAAAACTCACCCGGCGAGG	2	4
ACAAAACTCACTCGGCGAGG	1453	1334
ACAAAACTCACTCGGCGCGG	7	1
ACAAAACTCACTCGGCGGGG	4	2
ACAAAACTCGAGATGGGACT	1	4
ACAAAACTCGCTCGGCGAGG	4	3
ACAAAACTTACTCGGCGAGG	4	1
ACAAAAGCAGAATTGGGTAG	0	19
ACAAAAGCTCGTGATTCC	0	4
ACAAAATGCTGAGAGTCCCG	298	179
ACAAACCTGCGTGGAAGTCC	0	5
ACAAAGCTCACTCGGCGAGG	1	7
ACAAAGCTTTCTCATGCTGC	0	9
ACAAAGGCGATTGGAGTGT	1	5
ACAAAGTGCAGAGCAGGAGG	22	8
ACAAAGTGCAGAGCAGGAGT	510	430
ACAAAGTGCAGAGCAGGGGT	7	2
ACAACACACACAGACGCACG	445	288
ACAACACACACAGACGCCCG	4	1
ACAACACCCACAGCCCCACC	61	39
ACAACCGGGCCGCCCGCGCC	2	7
ACAACCTCTGCCTCCCTCCT	2	6
ACAACGCTCTTGCGATCTGC	102	15
ACAACGCTCTTGCGATCTGG	6	3
ACAACGGTCCGTTGGTTGCC	1	5
ACAACTGTGCTTCCCGGCGCT	0	5
ACAAGACAACTGAACGCAAG	7	0
ACAAGACAACTGGACGCAAG	104	88
ACAAGACCATGACCTAGGCT	5	8
ACAAGACGCTCTTGCGATCT	3	4
ACAAGCACAGTGAGGGAGGA	6	15
ACAAGCCCAGTGAGGGAGGA	6	2
ACAAGCCCTGAAGCTGCACC	3	5
ACAAGCCTGCCGCAGCTCCA	5	3
ACAAGCTAGCTCCCGAGGGT	0	17
ACAAGCTCAGCGAGGGAGGA	8	1
ACAAGCTCAGGGAGGGAGG	3	4
ACAAGCTCAGGGAGGGAGGA	10	6
ACAAGCTCAGTGAGGGAAGA	7	2
ACAAGCTCAGTGAGGGAGG	617	450
ACAAGCTCAGTGAGGGAGGA	1384	1254
ACAAGCTCAGTGAGGGAGGC	20	1
ACAAGCTCAGTGAGGGAGGG	17	11
ACAAGCTCAGTGAGGGGGGA	0	5
ACAAGCTCGGTGAGGGAGGA	5	0
ACAAGCTGAGTAGTGGTGG	0	4
ACAAGCTGCGCCCGGAGACG	6	3
ACAAGCTGCGGTGGCGTGGC	0	8
ACAAGCTTAGTGAGGGAGGA	1	5
ACAAGGTGGCGCAATGGGGC	13	24
ACAATGAGAGCGGGGCCCGT	8	0
ACAATGCAGCGGAGGAGCCA	1	4
ACAATGGGAGCGGGGCCCGG	18	2
ACAATGGGAGCGGGGCCCGT	759	585
ACAATGGGAGCGGGGCCTGT	4	0
ACACAACGCTCTTGCGATC	5	1
ACACAACGCTCTTGCGATCT	15	24
ACACAAGCTGCCTGCCACCG	3	7
ACACACAGGCCTGGTGTGAC	5	3
ACACACAGTGCAGTTGCCAG	0	4
ACACACCGCACCAGGCCTG	0	4
ACACACGTGGCATGGGGTAG	2	4
ACACACGTTGCACGGGGTAG	2	5
ACACACGTTGCATGGAGTAG	5	7
ACACACGTTGCATGGGGCAG	5	0
ACACACGTTGCATGGGGGAG	12	10
ACACACGTTGCATGGGGTAG	1002	939
ACACACGTTGCATGGGGTCG	5	1
ACACACGTTGCATGGGGTGG	4	3
ACACACGTTGTATGGGGTAG	1	5
ACACACTGCACCAGGCCCG	0	4
ACACACTGCACCAGGCCTG	340	423
ACACAGCAAGGGACATCACC	4	0
ACACAGGAGGACGGCTGCGG	11	19
ACACAGGCCAGAGCTCACCC	5	7
ACACAGTGGAAGCTGGAGTC	1	4
ACACAGTGGGCCGGGACTG	4	0
ACACAGTGTCCGCCTGGGCT	5	12
ACACATCCAGCCAGGCACGG	4	0
ACACATCCTCGGCTGTCCTGT	140	48
ACACATGGCAGGCGGGCCTG	0	4
ACACATTCAGCCAGGCACGG	308	218
ACACCAAGGCAAGGTCACGT	3	6
ACACCAATGGCAGCGGTGCT	6	1
ACACCACCCACAACAGCGA	0	4
ACACCACGCTCTTGCGATCT	4	5
ACACCACTGCACTCCAGCCT	259	21
ACACCACTGCACTCCTGCCT	6	0
ACACCACTGCCATTCAGCCT	0	4
ACACCACTGTACCCCAGCCT	6	1
ACACCACTGTACTCCACCTT	4	1
ACACCACTGTACTCCAGCCT	6	1
ACACCACTGTGCATATGCCTG	2	9
ACACCAGCCTTCGTGCCCCT	11	3
ACACCAGCGTGCCGAAAAGC	0	5
ACACCAGTTATCGACGGTAC	0	4
ACACCATCGACCCGAAGTTG	8	0
ACACCATGTCAAAGAGGGTA	6	0
ACACCATGTTGCGCACCCCG	1	5
ACACCCCCAAGGTGTCCCAG	338	229
ACACCCCCAAGGTGTCCCGG	1	4
ACACCCCTGAGCTCTGCAGA	95	15
ACACCCGCGAGCCGGCTGCA	0	9
ACACCCGTCAGCAGCCTCGA	68	38
ACACCCTCTGCTGTCCGTGT	8	9
ACACCCTGAGGTGTGCTGCC	5	1
ACACCGACCAATCTCGTATG	8	8
ACACCGCATGCAGGCACAGC	0	9
ACACCGCCCAGCTACTTGTG	6	8
ACACCGCCTCAGCTTCCGGT	5	6
ACACCGCGAAGGCGACGGCG	11	16
ACACCGGCTTGGTTACTAAG	5	0
ACACCTACCCTCGGCCTGG	4	0
ACACCTACCTGCTATGTGCC	7	7
ACACCTACTCTCGGCCTGG	439	384
ACACCTATTTCATGGCATGG	0	7
ACACCTCATTCCCGGATACT	143	120
ACACCTGAGTCCCAGTCCGT	0	12
ACACCTGCTTGAACCTTGCT	5	6
ACACCTTGCATGATGTCGTGG	4	3
ACACGACACTCTTGCGATCT	38	18
ACACGACCCTCTTGCGATCT	5	8
ACACGACGATCTTGCGATCT	13	4
ACACGACGCACTTGCGATCT	18	10
ACACGACGCCCTTGCGATC	21	9
ACACGACGCCCTTGCGATCT	85	67
ACACGACGCGCTTGCGATC	16	10
ACACGACGCGCTTGCGATCT	22	24
ACACGACGCTATTGCGATC	9	5
ACACGACGCTATTGCGATCT	5	5
ACACGACGCTCATGCGATC	0	4
ACACGACGCTCATGCGATCT	11	6
ACACGACGCTCCTGCGATC	20	13
ACACGACGCTCCTGCGATCT	68	63
ACACGACGCTCGTGCGATC	4	5
ACACGACGCTCGTGCGATCT	18	22
ACACGACGCTCTAGCGATCT	5	2
ACACGACGCTCTCGCGATC	12	11
ACACGACGCTCTCGCGATCT	62	42
ACACGACGCTCTGGCGATC	8	15
ACACGACGCTCTGGCGATCT	19	23
ACACGACGCTCTTACGATC	3	7
ACACGACGCTCTTACGATCT	25	16
ACACGACGCTCTTCCGATC	4	9
ACACGACGCTCTTCCGATCT	4	4
ACACGACGCTCTTCCGATTT	1	5
ACACGACGCTCTTGAGATCT	3	7
ACACGACGCTCTTGCAATC	10	3
ACACGACGCTCTTGCAATCT	36	12
ACACGACGCTCTTGCAATCTG	0	17
ACACGACGCTCTTGCGAAC	4	3
ACACGACGCTCTTGCGAACT	21	15
ACACGACGCTCTTGCGACC	18	11
ACACGACGCTCTTGCGACCT	83	49
ACACGACGCTCTTGCGAGC	19	9
ACACGACGCTCTTGCGAGCC	4	2
ACACGACGCTCTTGCGAGCG	9	4
ACACGACGCTCTTGCGAGCT	102	46
ACACGACGCTCTTGCGAT	15	27
ACACGACGCTCTTGCGATAT	1	5
ACACGACGCTCTTGCGATC	5233	4990
ACACGACGCTCTTGCGATCA	10	5
ACACGACGCTCTTGCGATCC	93	102
ACACGACGCTCTTGCGATCG	122	65
ACACGACGCTCTTGCGATCGC	1	4
ACACGACGCTCTTGCGATCGG	6	1
ACACGACGCTCTTGCGATCT	19351	21296
ACACGACGCTCTTGCGATCTA	2	8
ACACGACGCTCTTGCGATCTC	354	446
ACACGACGCTCTTGCGATCTG	462	484
ACACGACGCTCTTGCGATCTT	181	312
ACACGACGCTCTTGCGATGT	2	19
ACACGACGCTCTTGCGATT	2	4
ACACGACGCTCTTGCGATTT	11	20
ACACGACGCTCTTGCGCTC	3	4
ACACGACGCTCTTGCGCTCC	4	1
ACACGACGCTCTTGCGCTCT	23	35
ACACGACGCTCTTGCGGTC	11	6
ACACGACGCTCTTGCGGTCC	0	4
ACACGACGCTCTTGCGGTCG	4	3
ACACGACGCTCTTGCGGTCT	48	71
ACACGACGCTCTTGCGTGT	25	31
ACACGACGCTCTTGCGTTCT	6	9
ACACGACGCTCTTGCTATCT	6	10
ACACGACGCTCTTGGGATCT	4	8
ACACGACGCTCTTGTGATC	6	2
ACACGACGCTCTTGTGATCT	32	30
ACACGACGCTCTTTCGATC	4	2
ACACGACGCTCTTTCGATCT	3	4
ACACGACGCTGTTGCGATC	26	23
ACACGACGCTGTTGCGATCT	6	6
ACACGACGCTTTTGCGATC	6	10
ACACGACGCTTTTGCGATCT	23	8
ACACGACGGTCTTGCGATCT	2	4
ACACGACGTCTTGCGATCTGG	6	2
ACACGACGTTCTTGCGATC	5	0
ACACGACGTTCTTGCGATCT	21	18
ACACGACTCTCTTGCGATCT	7	9
ACACGACTCTTGCGATCTGC	239	328
ACACGATCCCAGGCAGGCTG	4	0
ACACGATCCCGTACGTGGCA	3	10
ACACGATCTCCAACTTGCGC	5	9
ACACGATGCTCTTGCGATC	4	1
ACACGATGCTCTTGCGATCT	9	15
ACACGATGTGCGATGTGGA	0	10
ACACGCACCGCACGTTCGT	12	1
ACACGCACCGCACGTTCGTG	4	4
ACACGCATCCTGCAGGATGT	0	13
ACACGCCGCGCGACAGCCTC	0	5
ACACGCCGCTCTTGCGATC	6	2
ACACGCCGCTCTTGCGATCT	16	11
ACACGCGGTATCCATGGCCA	9	17
ACACGCTCACCGACGGCCGT	6	20
ACACGCTCGAAGGAGCTCTG	4	0
ACACGCTGGGACTGAGTTCA	3	5
ACACGGCCCAGCTGGGCA	0	5
ACACGGCCGAACCCAAGGCA	0	5
ACACGGCGCTCTTGCGATC	18	11
ACACGGCGCTCTTGCGATCT	43	78
ACACGGGAAGAGCAGGAGGT	6	1
ACACGTCGCTCTTGCGATCT	12	6
ACACGTCGCTCTTGCGATCTT	4	0
ACACGTGGACGCTCACCTGA	0	8
ACACGTTCTTGACCGCGCAC	1	7
ACACTAACACGCTCAATGCC	10	1
ACACTACGCTCTTGCGATCT	8	6
ACACTACGCTCTTGCGATCTG	0	8
ACACTACTCCTTGTCTGGCC	3	5
ACACTATTGCGCTCCAGCCC	4	0
ACACTCAGGCAGCTACAGCT	0	4
ACACTCCCAATCGCCAAGTG	0	5
ACACTGACCAACCTCGTATG	4	4
ACACTGACCAATCCCGTATG	1	8
ACACTGACCAATCGCGTATG	1	5
ACACTGACCAATCTCGGATG	8	1
ACACTGACCAATCTCGTACG	2	6
ACACTGACCAATCTCGTATG	1313	1280
ACACTGACCAATCTCGTCTG	4	0
ACACTGACCAATCTCGTGTG	2	4
ACACTGACTAATCTCGTATG	7	2
ACACTGAGGCCACACCGGC	0	4
ACACTGGCAGCTCTGAGGTT	0	5
ACACTGGCCAATCTCGTATG	2	4
ACACTGGGGACTGCCGAAGT	0	4
ACACTGGGGACTGCTGAAGC	0	5
ACACTGGGGACTGCTGAAGG	0	5
ACACTGGGGACTGCTGAAGT	0	871
ACACTGTGGGGGCGGGGGGC	5	1
ACACTGTGTCCGACCCCAC	5	19
ACAGAACAGTCTCCGCAGCG	5	0
ACAGAACTCACTCGGCGAGG	4	7
ACAGAAGGCAGCTGCAGGGC	11	0
ACAGAAGTGAGCCAGCACGCC	5	6
ACAGACACAGGCTGAGTGAC	15	6
ACAGACACTCAGCTGGTGCC	5	4
ACAGACCGAAGTCCAGAATC	7	0
ACAGACCGAAGTCCAGAATG	671	568
ACAGACCGCAGGTGGAGGGG	4	3
ACAGACGAGAGCGCGAGCT	8	10
ACAGACGCTTGGGCGCATCG	198	212
ACAGACGTGACAGCAGCTGC	0	27
ACAGACGTGAGCCACCATGCC	5	1
ACAGACGTGAGCCACCATGGC	2	4
ACAGACTCACGCCACATGCC	10	18
ACAGAGACCCTGTCAGGCCGT	0	8
ACAGAGCAGGCCATGTGAGG	6	4
ACAGAGGGTGCGGAGCTGC	4	5
ACAGAGTGCAGAGCAGGAGT	1	4
ACAGAGTGTGCGGAGCCGC	8	2
ACAGAGTGTGCGGAGCTGC	991	978
ACAGAGTGTGCGGAGTAGCT	6	0
ACAGATTACGGCCAGAGTGC	23	20
ACAGATTCAGCAGTCAGGCT	4	3
ACAGCACCTGCCACCATGCC	8	3
ACAGCAGTGTCCACATCACT	7	8
ACAGCATGCAGGGGTGGGGC	1	4
ACAGCCAACAATCTCGTATG	4	1
ACAGCCACCCAAGGTGATGG	5	4
ACAGCCCCTGGCTTGGTGCT	15	21
ACAGCCCGCAATTCGCAGGC	0	7
ACAGCCGTGGAGGACGGCA	1	12
ACAGCCTCAGACGAGACTTG	2	4
ACAGCCTCCCTGCAGGGTGT	0	4
ACAGCCTCGCCAAGGGAGGT	3	6
ACAGCCTGAAACCAGCCTGG	12	3
ACAGCCTGCACCTGCAAGCA	338	534
ACAGCCTGCACCTGCAAGCC	6	1
ACAGCCTGGACCGACAGCCC	3	5
ACAGCGGAGCGTGCCCGGGC	5	1
ACAGCGGCATTCGGGTGTCA	7	5
ACAGCGTGGAGGTGGACATG	2	18
ACAGCGTGTGCGGAGCTGC	0	4
ACAGCGTTGGCTGTGGCCC	9	7
ACAGCGTTGGCTGTGGCCCA	12	9
ACAGCTGCTGGCCGAGGAGC	5	6
ACAGCTGTGCCTCCCTTGGGC	0	11
ACAGCTTGACAGCAGGACTT	3	5
ACAGCTTTGTATAGTGGGTG	3	5
ACAGGAAAACCACTTGAACC	3	4
ACAGGAAGTTGGGGGCAGGC	0	9
ACAGGACAATGGCGTGAACC	11	0
ACAGGACGCTCTTGCGATCT	6	2
ACAGGACGTGCCAGGAGGGG	0	5
ACAGGACTCAGCTCTGGCCA	3	6
ACAGGAGCCCATGGAGTGGA	0	4
ACAGGAGCCTCCCGGTTTCC	148	183
ACAGGATGCTTAGCCGTGCC	10	18
ACAGGATGTCGGGCGGCCGA	4	6
ACAGGCAACAATCTCGTATG	4	1
ACAGGCACAAGCCACCATGCC	4	0
ACAGGCACGTGCCACAGACC	6	5
ACAGGCATCTTCCCAGACGC	4	0
ACAGGCATGGGCGATGGGGC	9	17
ACAGGCATGTGCCACCAAGCC	5	0
ACAGGCTCAGCAGATGGTGC	8	0
ACAGGCTCAGTGAGGGAGGA	4	2
ACAGGCTCCAAGTTGAGGGA	5	3
ACAGGGAGAACGTGGGATGG	1	9
ACAGGGAGGACGTGGGAGGG	7	0
ACAGGGAGGACGTGGGATGG	659	499
ACAGGGAGGACGTGGGGTGG	6	0
ACAGGGATGAGTGAAAGTGT	1	7
ACAGGGGTCATCTCAGTTCC	3	5
ACAGGGTCATGCTCGTCTGC	0	11
ACAGGGTCATGTGCGTGTCC	4	6
ACAGGGTCCTGCTCAAGCCC	4	5
ACAGGGTCGCTTACGGGTTG	6	1
ACAGGGTCGCTTGCGGGGTG	5	7
ACAGGGTCGCTTGCGGGTCG	1	4
ACAGGGTCGCTTGCGGGTTG	302	547
ACAGGGTCGTGGGGAGGAGG	1	5
[truncated: 147,806 more rows]

## Sheet: Precision rate
	Parameter pairs
Repeat times	0.01-6	0.01-8	0.05-4	0.05-6	0.05-8	0.1-4	0.1-6	0.1-8	0.2-4	0.2-6	0.2-8
1	0.559322	0.762803	NA	0.842823	0.862539	0.654321	0.884603	0.911221	0.817919	0.929494	0.966861
2	0.479452	0.782609	0.492063	0.832998	0.869474	0.643939	0.883588	0.915466	0.81383	0.925172	0.965943
3	0.589744	0.784153	0.551724	0.835443	0.865151	0.702703	0.880801	0.911878	0.826203	0.924818	0.964439
4	0.6	0.790026	0.568966	0.840278	0.865969	0.684211	0.883428	0.916022	0.835544	0.925352	0.964549
5	0.552239	0.788136	0.458333	0.841924	0.865323	0.642857	0.880657	0.913392	0.824468	0.920119	0.963809
6	0.573529	0.775773	0.508475	0.851128	0.875399	0.628205	0.890078	0.919409	0.808696	0.928848	0.966806
7	0.508197	0.782723	0.490196	0.843191	0.866807	0.678571	0.880842	0.913765	0.833631	0.923661	0.956081
8	0.597403	0.774536	0.525424	0.838989	0.860673	0.690909	0.879537	0.909316	0.80814	0.918457	0.964616
9	0.641509	0.800539	0.461538	0.837363	0.861691	0.594203	0.88	0.912266	0.838196	0.921361	0.962974
10	0.514286	0.768638	0.440678	0.8414	0.861299	0.643411	0.888313	0.909863	0.825103	0.926601	0.965009
11	0.582278	0.792916	0.540984	0.838289	0.868015	0.681818	0.883312	0.916528	0.831197	0.926226	0.962036
12	0.513889	0.75853	0.416667	0.837464	0.865293	0.604938	0.885959	0.918197	0.818828	0.925707	0.965251
13	0.485981	0.779793	0.457143	0.835535	0.869841	0.590361	0.883219	0.918106	0.810667	0.926573	0.965707
14	0.492537	0.764706	0.466667	0.841767	0.863445	0.635514	0.871458	0.915123	0.815534	0.92575	0.956137
15	0.619469	0.783069	0.4375	0.844165	0.865996	0.636364	0.881506	0.915789	0.806358	0.92413	0.961957
16	0.633803	0.777487	0.510204	0.837517	0.858486	0.684932	0.875875	0.909516	0.836268	0.91896	0.962996
17	0.532258	0.782723	0.530612	0.839713	0.859686	0.675	0.878191	0.910168	0.795666	0.923468	0.96237
18	0.619048	0.782152	0.616667	0.840448	0.864979	0.725352	0.879235	0.910872	0.820163	0.922819	0.963977
19	0.514286	0.776882	0.465517	0.833005	0.867585	0.65	0.881795	0.917085	0.825103	0.920771	0.964936
20	0.5	0.8017	NA	0.842441	0.867578	0.713235	0.880834	0.912407	0.837912	0.925342	0.965563
21	0.533333	0.753149	0.433333	0.833766	0.871795	0.668966	0.886495	0.917831	0.828125	0.926494	0.964142
22	0.428571	0.758355	0.38	0.840643	0.856179	0.633929	0.881734	0.910313	0.828154	0.919209	0.964645
23	0.619469	0.785354	0.489796	0.839775	0.864442	0.690476	0.881799	0.914829	0.82549	0.925534	0.963623
24	0.544304	0.785714	0.540984	0.841991	0.869381	0.669118	0.882609	0.915446	0.841155	0.925685	0.965308
25	0.532258	0.779188	0.46	0.847076	0.860052	0.658537	0.887237	0.909814	0.819892	0.927308	0.963422
26	0.5	0.775401	0.419355	0.833566	0.861942	0.628319	0.878049	0.910818	0.823651	0.924036	0.962576
27	0.542857	0.758065	NA	0.831636	0.867934	0.622951	0.882169	0.916297	0.79558	0.929317	0.965451
28	0.533333	0.761039	NA	0.842181	0.872112	0.623377	0.882928	0.917552	0.788043	0.925117	0.965312
29	0.561644	0.750617	0.479167	0.832957	0.864496	0.671233	0.88512	0.914041	0.818182	0.920359	0.964058
30	0.577465	0.763359	NA	0.833333	0.865821	0.655172	0.879449	0.912995	0.804094	0.920314	0.964941
31	0.589041	0.778075	0.607843	0.83184	0.865092	0.710843	0.882975	0.917197	0.835793	0.926414	0.964741
32	0.55	0.797844	0.557692	0.853333	0.867438	0.73494	0.880208	0.911894	0.825967	0.919408	0.964444
33	0.55	0.783784	NA	0.845522	0.87289	0.6	0.880342	0.913079	0.827027	0.925273	0.965435
34	0.609756	0.770026	NA	0.839219	0.863852	0.6	0.880469	0.91427	0.811671	0.920966	0.965078
35	0.422535	0.765152	0.411765	0.837876	0.866175	0.607595	0.878703	0.913727	0.781977	0.920645	0.964133
36	0.583333	0.791086	0.48	0.847875	0.872386	0.682927	0.886628	0.91926	0.84492	0.929036	0.966657
37	0.544304	0.757412	0.479167	0.840877	0.866245	0.65	0.88509	0.917129	0.800532	0.924184	0.964021
38	0.545455	0.763158	0.559322	0.837453	0.863203	0.69186	0.882335	0.914882	0.829181	0.926032	0.965089
39	0.566667	0.762533	0.533333	0.837313	0.866878	0.681159	0.887968	0.913693	0.80198	0.929541	0.96461
40	0.645161	0.774611	0.653846	0.834052	0.860965	0.72973	0.880649	0.91314	0.827586	0.926546	0.96359
41	0.590164	0.793651	0.633333	0.842256	0.868644	0.721088	0.881191	0.916805	0.847397	0.926103	0.965696
42	0.554217	0.770833	NA	0.839791	0.866001	0.652778	0.883516	0.915348	0.808108	0.923029	0.963852
43	0.576923	0.777778	0.559322	0.831423	0.869958	0.693694	0.881666	0.917595	0.825737	0.926452	0.964725
44	0.555556	0.783069	0.566667	0.840504	0.869079	0.670732	0.882854	0.916088	0.821138	0.926356	0.965113
45	0.545455	0.774278	0.52459	0.839298	0.868015	0.686747	0.882427	0.914516	0.821012	0.925743	0.964583
46	0.571429	0.773087	0.474576	0.837324	0.864894	0.676692	0.879725	0.907942	0.801676	0.920255	0.96475
47	0.61039	0.777188	0.517241	0.838893	0.86478	0.650794	0.881398	0.914776	0.821809	0.925726	0.964021
48	0.575	0.807163	0.519231	0.836184	0.868324	0.6875	0.885732	0.917588	0.835106	0.928375	0.965625
49	0.563107	0.763158	0.440678	0.842798	0.863684	0.674419	0.882501	0.914681	0.832168	0.922478	0.964233
50	0.56338	0.789474	0.6	0.841088	0.863064	0.701863	0.88381	0.913946	0.836292	0.92367	0.96468
51	0.597222	0.776903	NA	0.840926	0.869565	0.680556	0.883265	0.918288	0.828678	0.923077	0.966029
52	0.630952	0.770053	0.48	0.841317	0.871987	0.658537	0.888853	0.916875	0.820106	0.92023	0.965789
53	0.559524	0.778689	0.490196	0.832005	0.865711	0.675439	0.881319	0.91639	0.819892	0.925387	0.964928
54	0.571429	0.769634	0.491803	0.842069	0.869381	0.707965	0.884424	0.914888	0.826958	0.924407	0.963731
55	0.64557	0.76781	NA	0.841642	0.860574	0.714286	0.878328	0.911473	0.823529	0.919434	0.961965
56	0.518987	0.783476	NA	0.851962	0.876609	0.621359	0.882241	0.916736	0.81044	0.923635	0.967184
57	0.542857	0.792453	NA	0.843706	0.866702	0.57971	0.880435	0.915629	0.8413	0.920478	0.956364
58	0.5	0.760925	0.506494	0.830486	0.864282	0.666667	0.88036	0.913416	0.803235	0.923825	0.963698
59	0.61039	0.790761	NA	0.844101	0.868628	0.703704	0.881787	0.915859	0.833984	0.924992	0.96701
60	0.538462	0.762274	0.416667	0.830598	0.853417	0.657895	0.885851	0.915442	0.808989	0.927085	0.965019
61	0.578431	0.77628	0.448276	0.84405	0.866456	0.660377	0.883634	0.912755	0.81383	0.922741	0.965104
62	0.627273	0.773196	0.483333	0.838391	0.864851	0.675926	0.882463	0.914459	0.825737	0.925738	0.964949
63	0.594203	0.794595	0.54	0.832988	0.868143	0.71519	0.886148	0.906634	0.839034	0.926171	0.958832
64	0.519481	0.792244	0.547945	0.839734	0.868991	0.699387	0.879937	0.915053	0.822857	0.925359	0.963895
65	0.556962	0.778364	0.466667	0.838225	0.867725	0.666667	0.883339	0.914546	0.803815	0.925896	0.964863
66	0.47619	0.75853	0.45	0.831612	0.85357	0.679104	0.88444	0.915737	0.803815	0.919643	0.961595
67	0.544304	0.751323	NA	0.842403	0.868365	0.589041	0.881905	0.918225	0.805333	0.926998	0.965471
68	0.506494	0.781003	0.457627	0.836948	0.864282	0.619048	0.880832	0.914381	0.832746	0.924872	0.963556
69	0.493671	0.764103	0.396552	0.840621	0.867508	0.571429	0.88113	0.914452	0.793956	0.921446	0.964711
70	0.52439	0.770026	0.470588	0.838124	0.857747	0.62963	0.882277	0.916503	0.823105	0.923126	0.96574
71	0.571429	0.773936	0.48	0.842327	0.865963	0.684685	0.879975	0.912	0.828185	0.924257	0.955639
72	0.571429	0.784574	0.534483	0.844101	0.866844	0.657658	0.882426	0.9123	0.831349	0.920859	0.964889
73	0.604938	0.783562	0.517241	0.840708	0.86438	0.666667	0.880597	0.913946	0.82963	0.922255	0.965179
74	0.514286	0.797222	NA	0.845604	0.868143	0.594203	0.881477	0.915836	0.84	0.925048	0.966523
75	0.628205	0.763021	0.54902	0.83915	0.863092	0.707965	0.876823	0.912363	0.817185	0.924402	0.959014
76	0.5	0.746114	0.455882	0.84	0.858559	0.627273	0.884214	0.916111	0.798913	0.926378	0.965061
77	0.522523	0.762626	0.517241	0.834201	0.866737	0.625	0.881345	0.91183	0.798408	0.923246	0.965297
78	0.607595	0.77957	NA	0.845609	0.871054	0.666667	0.884207	0.917549	0.837294	0.925973	0.965958
79	0.604938	0.798898	0.542373	0.844575	0.868896	0.675	0.881775	0.914982	0.831551	0.925223	0.966394
80	0.597561	0.76378	NA	0.85046	0.861763	0.597403	0.874577	0.908144	0.806316	0.919926	0.963959
81	0.491525	0.793478	0.571429	0.84086	0.870331	0.707317	0.884156	0.914286	0.836614	0.925629	0.965256
82	0.530864	0.761658	0.465517	0.850411	0.86323	0.603604	0.879273	0.912276	0.825771	0.920511	0.964259
83	0.62963	0.767624	NA	0.843206	0.871123	0.702381	0.881882	0.916435	0.820327	0.920846	0.964365
84	0.563492	0.763158	0.55	0.842877	0.867476	0.656977	0.883802	0.918934	0.819887	0.926195	0.964891
85	0.531646	0.741855	0.607143	0.829787	0.86635	0.70202	0.883833	0.907276	0.80036	0.928245	0.965543
86	0.590164	0.756345	0.607843	0.824271	0.863279	0.736111	0.882032	0.913079	0.816876	0.92458	0.963701
87	0.513761	0.771277	0.433333	0.839879	0.867515	0.609756	0.8843	0.915212	0.787535	0.925223	0.965983
88	0.492063	0.753731	0.47541	0.835954	0.861691	0.656627	0.888289	0.920112	0.814453	0.927882	0.965651
89	0.52381	0.784153	0.564516	0.835106	0.868477	0.687943	0.883648	0.915184	0.8125	0.923686	0.963771
90	0.6	0.785714	NA	0.833665	0.860429	0.666667	0.879644	0.918731	0.804805	0.924582	0.964881
91	0.551282	0.781003	NA	0.839716	0.862663	0.603175	0.881313	0.913993	0.811634	0.924729	0.963669
92	0.544304	0.768	0.44	0.853386	0.868922	0.638554	0.884892	0.915792	0.817927	0.93	0.965573
93	0.512821	0.765333	0.482759	0.842655	0.870813	0.62963	0.885137	0.917683	0.79558	0.926431	0.965696
94	0.542857	0.771208	0.589744	0.838889	0.860951	0.671329	0.8799	0.911611	0.801609	0.925466	0.963357
95	0.576923	0.79235	NA	0.837509	0.864113	0.7	0.879704	0.910591	0.83174	0.924097	0.965118
96	0.525641	0.769634	0.4	0.837977	0.867438	0.589744	0.880455	0.915493	0.795389	0.922824	0.965512
97	0.509259	0.754011	0.441176	0.837148	0.870282	0.606061	0.888644	0.919521	0.804878	0.927871	0.964355
98	0.628205	0.770619	0.54	0.832335	0.856993	0.696203	0.877107	0.909366	0.80274	0.920736	0.963776
99	0.628571	0.790026	0.533333	0.844291	0.867546	0.638889	0.880337	0.916251	0.826203	0.923828	0.96498
100	0.5375	0.780161	0.4	0.837004	0.865395	0.642857	0.882905	0.913898	0.816216	0.927713	0.964625

## Sheet: Recall rate
	Parameter pairs
Repeat times	0.01-6	0.01-8	0.05-4	0.05-6	0.05-8	0.1-4	01.-6	0.1-8	0.2-4	0.2-6	0.2-8
1	0.0976331	0.837278	NA	0.621893	0.972781	0.0156805	0.807396	0.977811	0.0418639	0.830769	0.958136
2	0.10355	0.852071	0.0183432	0.734911	0.977515	0.0251479	0.821893	0.977219	0.0452663	0.854142	0.960799
3	0.136095	0.849112	0.0189349	0.663905	0.968047	0.0230769	0.819822	0.976627	0.0457101	0.864349	0.96287
4	0.186391	0.890533	0.0195266	0.715976	0.978698	0.0230769	0.829586	0.981065	0.0465976	0.865533	0.965976
5	0.109467	0.825444	0.0130178	0.724852	0.96568	0.0133136	0.840533	0.976627	0.045858	0.867308	0.961243
6	0.115385	0.890533	0.0177515	0.669822	0.972781	0.014497	0.81213	0.975444	0.0412722	0.851627	0.960799
7	0.091716	0.884615	0.0147929	0.725444	0.978107	0.0281065	0.842012	0.978107	0.0689349	0.864497	0.97574
8	0.136095	0.863905	0.0183432	0.687574	0.968639	0.0224852	0.831657	0.976036	0.0411243	0.86642	0.955769
9	0.201183	0.878698	0.0142012	0.676331	0.976923	0.0121302	0.833136	0.981361	0.0467456	0.873521	0.969527
10	0.106509	0.884615	0.0153846	0.668639	0.981065	0.0245562	0.811834	0.982544	0.0593195	0.849704	0.958728
11	0.136095	0.860947	0.0195266	0.684024	0.965089	0.0221893	0.833136	0.974556	0.0575444	0.863609	0.96716
12	0.109467	0.85503	0.0118343	0.679882	0.969231	0.014497	0.825148	0.976331	0.0681953	0.857101	0.961538
13	0.153846	0.890533	0.0189349	0.748521	0.972781	0.014497	0.834615	0.975148	0.0449704	0.862426	0.962278
14	0.0976331	0.846154	0.016568	0.620118	0.972781	0.0201183	0.864497	0.97929	0.0621302	0.863166	0.973817
15	0.207101	0.87574	0.012426	0.714793	0.967456	0.014497	0.851775	0.978107	0.0412722	0.868491	0.968787
16	0.133136	0.878698	0.0147929	0.710651	0.972781	0.0147929	0.851775	0.978402	0.0702663	0.884024	0.966272
17	0.0976331	0.884615	0.0153846	0.623077	0.971598	0.0159763	0.844675	0.977219	0.0380178	0.860355	0.960947
18	0.115385	0.881657	0.0218935	0.710651	0.970414	0.0304734	0.82929	0.976627	0.0445266	0.856065	0.957988
19	0.106509	0.85503	0.0159763	0.749704	0.969231	0.0153846	0.825444	0.971893	0.0593195	0.876775	0.956657
20	0.0857988	0.837278	NA	0.702367	0.976923	0.0286982	0.837574	0.976923	0.0451183	0.859911	0.962278
21	0.16568	0.884615	0.0153846	0.759763	0.96568	0.0286982	0.81568	0.971598	0.0705621	0.857692	0.95858
22	0.0887574	0.872781	0.0112426	0.680473	0.97574	0.0210059	0.842604	0.981953	0.0670118	0.886982	0.964645
23	0.207101	0.920118	0.0142012	0.707101	0.981065	0.0171598	0.85858	0.981953	0.0622781	0.865976	0.967899
24	0.127219	0.878698	0.0195266	0.690533	0.972781	0.0269231	0.840828	0.980178	0.0689349	0.864201	0.963166
25	0.0976331	0.908284	0.0136095	0.668639	0.974556	0.0159763	0.812426	0.981953	0.0451183	0.852959	0.966272
26	0.115385	0.857988	0.0153846	0.705325	0.971598	0.0210059	0.84142	0.978994	0.0587278	0.854734	0.96642
27	0.112426	0.83432	NA	0.724852	0.972189	0.0112426	0.83284	0.978107	0.0426036	0.855769	0.963166
28	0.0946746	0.866864	NA	0.694675	0.960355	0.0142012	0.827811	0.971302	0.0428994	0.851627	0.959172
29	0.121302	0.899408	0.0136095	0.65503	0.973964	0.014497	0.818343	0.978402	0.066568	0.878698	0.960207
30	0.121302	0.887574	NA	0.647929	0.969822	0.0112426	0.811538	0.974852	0.0406805	0.867899	0.956805
31	0.127219	0.860947	0.0183432	0.714201	0.975148	0.0174556	0.839349	0.979882	0.0670118	0.862278	0.963314
32	0.0976331	0.87574	0.0171598	0.643787	0.97574	0.0180473	0.85	0.979882	0.0442308	0.872485	0.963018
33	0.0976331	0.857988	NA	0.670414	0.97929	0.0142012	0.822781	0.978994	0.0452663	0.85355	0.962722
34	0.147929	0.881657	NA	0.660947	0.968639	0.0106509	0.821598	0.978107	0.0452663	0.873964	0.964793
35	0.0887574	0.89645	0.012426	0.709467	0.972781	0.0142012	0.833728	0.980769	0.0397929	0.870118	0.966272
36	0.14497	0.840237	0.0142012	0.672781	0.962722	0.016568	0.81213	0.970118	0.0701183	0.844379	0.956361
37	0.127219	0.831361	0.0136095	0.70355	0.973373	0.0153846	0.827219	0.978994	0.0445266	0.854734	0.963166
38	0.12426	0.857988	0.0195266	0.661538	0.963314	0.0352071	0.836391	0.973077	0.0689349	0.85932	0.965089
39	0.100592	0.85503	0.0189349	0.663905	0.971006	0.0139053	0.792604	0.977219	0.0359467	0.841124	0.959615
40	0.118343	0.884615	0.0201183	0.686982	0.971006	0.0239645	0.818639	0.976627	0.0461538	0.850888	0.959172
41	0.106509	0.887574	0.0224852	0.698225	0.970414	0.0313609	0.831657	0.978107	0.0698225	0.860207	0.961982
42	0.136095	0.87574	NA	0.666864	0.975148	0.0139053	0.832544	0.97574	0.0442308	0.871006	0.962426
43	0.133136	0.890533	0.0195266	0.729586	0.969822	0.0227811	0.826627	0.975148	0.0455621	0.859024	0.96287
44	0.133136	0.87574	0.0201183	0.670414	0.966272	0.0162722	0.827219	0.975444	0.0448225	0.861538	0.961686
45	0.12426	0.872781	0.0189349	0.707692	0.965089	0.0337278	0.834911	0.974852	0.062426	0.861243	0.958876
46	0.177515	0.866864	0.016568	0.70355	0.96213	0.0266272	0.833136	0.977515	0.0424556	0.85355	0.955473
47	0.139053	0.866864	0.0177515	0.699408	0.976331	0.0121302	0.835503	0.978107	0.0457101	0.86287	0.963166
48	0.136095	0.866864	0.0159763	0.752071	0.971598	0.0227811	0.830178	0.981657	0.0464497	0.849408	0.964053
49	0.171598	0.857988	0.0153846	0.720118	0.971006	0.0343195	0.831065	0.976923	0.0704142	0.876627	0.965089
50	0.118343	0.887574	0.0177515	0.695266	0.973373	0.033432	0.823669	0.977219	0.0627219	0.868195	0.957544
51	0.127219	0.87574	NA	0.666272	0.970414	0.014497	0.826036	0.977515	0.0658284	0.868047	0.963314
52	0.156805	0.852071	0.0142012	0.665089	0.963314	0.0159763	0.809172	0.97574	0.045858	0.875444	0.960503
53	0.139053	0.843195	0.0147929	0.74142	0.965089	0.0227811	0.845858	0.97929	0.0451183	0.856805	0.960503
54	0.130178	0.869822	0.0177515	0.722485	0.972781	0.0236686	0.839941	0.976331	0.0671598	0.870118	0.963018
55	0.150888	0.860947	NA	0.67929	0.975148	0.0133136	0.839349	0.977811	0.0621302	0.864349	0.961538
56	0.121302	0.813609	NA	0.681065	0.966864	0.0189349	0.820118	0.973964	0.0436391	0.865976	0.959172
57	0.168639	0.869822	NA	0.705917	0.973373	0.0118343	0.838757	0.97929	0.0650888	0.86642	0.975888
58	0.118343	0.87574	0.0230769	0.747929	0.972189	0.0284024	0.838166	0.976923	0.0440828	0.857544	0.96213
59	0.139053	0.860947	NA	0.711243	0.978107	0.0168639	0.840828	0.978994	0.0631657	0.86287	0.958284
60	0.12426	0.872781	0.0118343	0.748521	0.968047	0.0221893	0.82426	0.976923	0.0426036	0.850148	0.959024
61	0.174556	0.852071	0.0153846	0.67574	0.975148	0.0207101	0.840237	0.978107	0.0452663	0.876331	0.965533
62	0.204142	0.887574	0.0171598	0.702959	0.976923	0.0215976	0.839645	0.980473	0.0455621	0.863018	0.961095
63	0.121302	0.869822	0.0159763	0.714201	0.973964	0.033432	0.828994	0.982544	0.0616864	0.868491	0.971598
64	0.118343	0.846154	0.0236686	0.672781	0.973373	0.0337278	0.830473	0.978402	0.0426036	0.858284	0.963609
65	0.130178	0.872781	0.016568	0.692899	0.970414	0.0319527	0.842308	0.978402	0.0436391	0.855769	0.962722
66	0.0887574	0.85503	0.0159763	0.619527	0.969231	0.0269231	0.803846	0.971006	0.0436391	0.853254	0.963018
67	0.127219	0.840237	NA	0.705325	0.968047	0.0127219	0.821893	0.973373	0.0446746	0.852811	0.963757
68	0.115385	0.87574	0.0159763	0.66213	0.972189	0.0192308	0.826627	0.976331	0.0699704	0.855917	0.96213
69	0.115385	0.881657	0.0136095	0.705325	0.976331	0.0130178	0.839941	0.977219	0.0427515	0.874556	0.958432
70	0.127219	0.881657	0.0189349	0.655621	0.959763	0.0251479	0.811538	0.964497	0.0674556	0.863314	0.95074
71	0.118343	0.860947	0.0142012	0.711243	0.971006	0.0224852	0.843787	0.978107	0.0634615	0.864645	0.975148
72	0.130178	0.872781	0.0183432	0.711243	0.966864	0.0215976	0.839349	0.978698	0.0619822	0.869231	0.963462
73	0.14497	0.846154	0.0177515	0.674556	0.969231	0.0207101	0.83787	0.977219	0.0662722	0.868639	0.959467
74	0.106509	0.849112	NA	0.7	0.973964	0.0121302	0.840533	0.978698	0.0497041	0.859911	0.960947
75	0.14497	0.866864	0.016568	0.654438	0.981065	0.0236686	0.836095	0.982544	0.0661243	0.857396	0.972633
76	0.115385	0.852071	0.0183432	0.683432	0.973373	0.0204142	0.826923	0.97574	0.0434911	0.852515	0.960207
77	0.171598	0.893491	0.0177515	0.663905	0.969822	0.0207101	0.837278	0.976036	0.0445266	0.870118	0.96287
78	0.142012	0.857988	NA	0.706509	0.963314	0.0142012	0.838166	0.974556	0.0677515	0.862278	0.961243
79	0.14497	0.857988	0.0189349	0.681657	0.968639	0.0159763	0.823077	0.977515	0.0460059	0.858432	0.961391
80	0.14497	0.860947	NA	0.656213	0.977515	0.0136095	0.841716	0.979882	0.0566568	0.876923	0.965385
81	0.0857988	0.863905	0.016568	0.694083	0.965089	0.0171598	0.810651	0.975148	0.0628698	0.85429	0.961686
82	0.127219	0.869822	0.0159763	0.672781	0.971006	0.0198225	0.844675	0.978402	0.0673077	0.873669	0.961834
83	0.150888	0.869822	NA	0.715976	0.963905	0.0174556	0.848225	0.976627	0.0668639	0.869083	0.964793
84	0.210059	0.857988	0.0195266	0.714201	0.972189	0.033432	0.828107	0.97929	0.064645	0.848373	0.959467
85	0.12426	0.87574	0.0301775	0.715385	0.970414	0.0411243	0.810355	0.981361	0.0658284	0.842012	0.961686
86	0.106509	0.881657	0.0183432	0.735503	0.975148	0.0156805	0.811834	0.978994	0.0673077	0.854142	0.966124
87	0.16568	0.857988	0.0153846	0.657988	0.968639	0.0147929	0.829882	0.977219	0.0411243	0.858432	0.961982
88	0.091716	0.89645	0.0171598	0.723669	0.976923	0.0322485	0.828107	0.974556	0.0616864	0.852663	0.960651
89	0.0976331	0.849112	0.0207101	0.650296	0.965089	0.0286982	0.831361	0.973669	0.0403846	0.863018	0.960207
90	0.142012	0.878698	NA	0.744379	0.973964	0.0136095	0.819527	0.976627	0.039645	0.859615	0.959172
91	0.127219	0.87574	NA	0.700592	0.977515	0.0112426	0.826036	0.977811	0.0433432	0.859615	0.965237
92	0.127219	0.852071	0.0130178	0.633728	0.972781	0.0156805	0.836982	0.981361	0.0431953	0.852959	0.966716
93	0.118343	0.849112	0.016568	0.668639	0.969231	0.0150888	0.829882	0.979586	0.0426036	0.864349	0.961982
94	0.112426	0.887574	0.0272189	0.625444	0.974556	0.0284024	0.830178	0.982544	0.0442308	0.859615	0.964497
95	0.133136	0.857988	NA	0.692308	0.974556	0.0289941	0.843787	0.97929	0.0643491	0.866272	0.961834
96	0.121302	0.869822	0.0118343	0.676331	0.97574	0.0136095	0.847633	0.980769	0.0408284	0.870266	0.960799
97	0.162722	0.83432	0.0177515	0.757396	0.968639	0.0177515	0.835799	0.976923	0.0439349	0.854438	0.960503
98	0.14497	0.884615	0.0159763	0.657988	0.964497	0.0162722	0.846746	0.976627	0.0433432	0.872929	0.968195
99	0.195266	0.890533	0.0189349	0.721893	0.972781	0.0136095	0.835799	0.977515	0.0457101	0.868343	0.961982
100	0.127219	0.860947	0.0118343	0.674556	0.966272	0.0213018	0.83432	0.976627	0.0446746	0.856213	0.960059

## Sheet: Summary
Parameter pairs	Average precision rate	Standard deviation of precision rate	Average recall rate	Standard deviation of recall rate
0.01-6	0.556783	0.0470656	0.130621	0.0288945
0.01-8	0.775008	0.0135132	0.867633	0.0186057
0.05-4	0.501332	0.0606992	0.0170025	0.00333207
0.05-6	0.839533	0.00532822	0.691503	0.0326689
0.05-8	0.865759	0.00423539	0.971349	0.00470689
0.1-4	0.660085	0.0391509	0.0203047	0.00697352
0.1-6	0.882227	0.00303089	0.831136	0.0123728
0.1-8	0.914424	0.00289578	0.977441	0.00294221
0.2-4	0.818821	0.0143216	0.0527308	0.0110451
0.2-6	0.924364	0.0027366	0.861827	0.00931739
0.2-8	0.964239	0.00216363	0.962685	0.00425267
