# Supplementary material for: Whole-genome epigenetic function annotation through sgRNA libraries synthesized by controlled template-dependent elongation
Source: Research Square preprint supplement (doi:10.21203/rs.3.rs-100657/v1), 2020-11-05
Supplement: Supplementary file 2 [file TableS10.xlsx]

## Sheet: Exons
Description	pvalue	p.adjust	Count
ncRNA metabolic process	4.71042e-55	2.38347e-51	152
mitochondrial gene expression	4.68853e-38	1.1862e-34	70
translational elongation	1.23758e-35	1.56554e-32	62
ribonucleoprotein complex biogenesis	2.44156e-33	1.54428e-30	108
viral gene expression	2.35506e-25	7.00978e-23	65
mRNA catabolic process	1.87004e-24	4.98021e-22	88
viral transcription	3.34433e-24	8.46114e-22	61
cellular protein complex disassembly	5.75586e-21	1.26629e-18	60
protein targeting to ER	1.84394e-18	3.34679e-16	41
SRP-dependent cotranslational protein targeting to membrane	1.85198e-18	3.34679e-16	40
establishment of protein localization to endoplasmic reticulum	8.63897e-18	1.40592e-15	41
protein localization to endoplasmic reticulum	8.89117e-18	1.40592e-15	44
RNA localization	2.26139e-17	3.46747e-15	57
nuclear transport	8.43621e-14	1.04115e-11	65
mitochondrion organization	1.57839e-13	1.90158e-11	85
regulation of mitotic cell cycle phase transition	6.15283e-13	6.62411e-11	79
protein modification by small protein removal	2.12816e-12	1.99417e-10	58
G2/M transition of mitotic cell cycle	2.80497e-12	2.53449e-10	53
nucleic acid transport	3.24992e-12	2.78722e-10	44
RNA transport	3.24992e-12	2.78722e-10	44
mitochondrial respiratory chain complex assembly	8.24992e-12	6.62613e-10	29
ribonucleoprotein complex localization	1.07318e-11	8.35432e-10	34
negative regulation of mitotic cell cycle	4.03298e-11	2.91527e-09	60
telomere organization	1.28683e-10	8.34793e-09	40
anaphase-promoting complex-dependent catabolic process	2.5454e-10	1.59009e-08	26
mitotic nuclear division	2.97175e-10	1.83379e-08	49
mitotic sister chromatid segregation	3.95966e-10	2.35716e-08	34
regulation of mRNA stability	1.24234e-09	6.7594e-08	37
ribonucleoprotein complex assembly	1.31615e-09	7.08481e-08	44
regulation of chromosome organization	1.3907e-09	7.25625e-08	57
respiratory electron transport chain	1.67456e-09	8.64619e-08	29
chromatin remodeling	3.16376e-09	1.58501e-07	36
ATP synthesis coupled electron transport	3.26409e-09	1.60635e-07	26
regulation of signal transduction by p53 class mediator	4.07819e-09	1.92857e-07	39
ribonucleoprotein complex subunit organization	8.04388e-09	3.70018e-07	44
spindle organization	2.91667e-08	1.2197e-06	33
regulation of stem cell differentiation	6.27613e-08	2.48103e-06	28
cellular response to UV	6.50933e-08	2.53363e-06	22
regulation of cellular amino acid metabolic process	1.12131e-07	4.17194e-06	19
chromosome segregation	1.30763e-07	4.76014e-06	48
nucleoside triphosphate metabolic process	1.67311e-07	6.0471e-06	55
protein-containing complex localization	2.18011e-07	7.65301e-06	43
response to UV	2.19305e-07	7.65301e-06	30
hematopoietic stem cell differentiation	2.79705e-07	9.4987e-06	22
regulation of gene silencing	3.06319e-07	1.02211e-05	30
positive regulation of telomerase RNA localization to Cajal body	3.63954e-07	1.19585e-05	9
regulation of hematopoietic progenitor cell differentiation	4.38848e-07	1.43262e-05	22
antigen processing and presentation of exogenous peptide antigen via MHC class I	1.70415e-06	4.97647e-05	20
positive regulation of gene expression, epigenetic	1.71128e-06	4.97647e-05	15
regulation of gene silencing by miRNA	1.798e-06	5.16926e-05	25
positive regulation of protein localization to nucleus	3.0128e-06	8.2852e-05	19
RNA localization to nucleus	5.02545e-06	0.000131076	9
regulation of mitotic nuclear division	5.0558e-06	0.000131192	29
interleukin-1-mediated signaling pathway	9.60607e-06	0.000232568	22
protein import	1.10909e-05	0.000263475	27
positive regulation of type I interferon production	1.23438e-05	0.000283907	18
response to endoplasmic reticulum stress	1.86311e-05	0.000415301	40
regulation of protein stability	1.89416e-05	0.000420371	42
protein N-linked glycosylation	2.08138e-05	0.000459904	16
blastocyst development	2.32954e-05	0.000501595	21
cellular ketone metabolic process	2.90012e-05	0.000606389	38
cellular response to interleukin-1	3.07944e-05	0.000637326	28
positive regulation of viral process	4.3472e-05	0.000872891	21
stem cell differentiation	4.56886e-05	0.000910174	37
regulation of protein modification by small protein conjugation or removal	6.48844e-05	0.00125311	35
retrograde vesicle-mediated transport, Golgi to ER	6.75973e-05	0.00128587	17
histone modification	6.81313e-05	0.00129118	56
Wnt signaling pathway, planar cell polarity pathway	7.80151e-05	0.00146206	21
protein-DNA complex assembly	0.000101144	0.00186783	33
DNA damage response, detection of DNA damage	0.000113046	0.00203562	11
negative regulation of chromosome segregation	0.000113046	0.00203562	11
regulation of small molecule metabolic process	0.000122035	0.00217429	57
methylation	0.000159445	0.00265392	46
establishment of planar polarity	0.000221026	0.00359612	22
establishment of tissue polarity	0.000221026	0.00359612	22
cellular response to oxygen levels	0.000222057	0.0036013	35
response to interleukin-1	0.000223939	0.00362023	29
regulation of response to DNA damage stimulus	0.000228216	0.00367762	31
protein tetramerization	0.000235914	0.0037896	27
regulation of ribosome biogenesis	0.000247939	0.00394519	6
stem cell population maintenance	0.000252615	0.00399447	26
retrograde protein transport, ER to cytosol	0.000264879	0.00412396	9
protein folding	0.000266683	0.00413932	28
maintenance of cell number	0.000309663	0.00473382	26
T cell receptor signaling pathway	0.000388943	0.00577779	28
response to oxygen levels	0.000393802	0.00580944	50
dolichol-linked oligosaccharide biosynthetic process	0.00039733	0.00581067	7
oligosaccharide-lipid intermediate biosynthetic process	0.00039733	0.00581067	7
mitochondrial RNA processing	0.000405062	0.00585605	6
regulation of morphogenesis of an epithelium	0.000426341	0.00612865	28
multi-organism transport	0.000475009	0.00677055	15
multi-organism localization	0.000475009	0.00677055	15
nucleosome organization	0.000504729	0.00715387	26
mitochondrion morphogenesis	0.000570003	0.00796745	7
DNA damage checkpoint	0.000679277	0.00934006	22
type I interferon production	0.000722918	0.00985975	21
regulation of nucleocytoplasmic transport	0.000737384	0.0100031	18
anatomical structure homeostasis	0.000875558	0.0116281	51
tRNA 5'-end processing	0.000941718	0.0123769	6
Golgi organization	0.00096817	0.0126588	17
metaphase plate congression	0.000978872	0.0127657	12
regulation of DNA binding	0.00105947	0.0137108	20
ciliary basal body-plasma membrane docking	0.00109447	0.0140559	17
chromosome localization	0.00128267	0.0161853	14
intracellular transport of virus	0.0013637	0.0171224	12
cellular response to nerve growth factor stimulus	0.00152361	0.0187123	10
mitotic spindle assembly checkpoint	0.00175307	0.0211425	8
mitotic spindle checkpoint	0.00175307	0.0211425	8
regulation of cyclin-dependent protein serine/threonine kinase activity	0.00189476	0.0224006	15
response to nerve growth factor	0.00261134	0.0293631	10
endoplasmic reticulum unfolded protein response	0.00278432	0.0310323	18
porphyrin-containing compound biosynthetic process	0.00318631	0.0346578	7
ERAD pathway	0.00319181	0.0346578	14
regulation of spindle checkpoint	0.00327676	0.0352026	5
negative regulation of chromosome separation	0.00336748	0.0356873	8
organelle localization by membrane tethering	0.00337125	0.0356873	21
regulation of microtubule-based process	0.00379304	0.0394913	27
response to unfolded protein	0.00380188	0.0395021	23
positive regulation of multi-organism process	0.00383459	0.0397602	25
spindle localization	0.0039353	0.040638	9
modulation by virus of host process	0.00401389	0.0411973	7
cell aging	0.00409846	0.0419649	18
maintenance of protein localization in organelle	0.00410527	0.0419649	8
cofactor biosynthetic process	0.00422868	0.0431394	38
regulation of cellular protein catabolic process	0.00426799	0.0432786	30
nucleotide-excision repair, preincision complex stabilization	0.00453829	0.0452043	6
binding of sperm to zona pellucida	0.00496152	0.048843	8
toxin transport	0.00496152	0.048843	8

## Sheet: Proximal promoter
Description	pvalue	p.adjust	Count
mRNA catabolic process	1.37005e-10	7.74214e-07	72
establishment of protein localization to organelle	1.0626e-08	2.00158e-05	83
protein targeting	1.14868e-06	0.000927314	65
autophagy	2.20434e-06	0.00138408	78
process utilizing autophagic mechanism	2.20434e-06	0.00138408	78
protein deubiquitination	5.09931e-06	0.00288162	49
histone modification	5.77016e-06	0.00296429	70
signal transduction by p53 class mediator	7.88819e-06	0.00335488	49
macromolecule deacylation	8.31151e-06	0.00335488	23
covalent chromatin modification	1.6577e-05	0.00551038	70
regulation of cellular amine metabolic process	1.88658e-05	0.00592281	21
regulation of autophagy	2.70659e-05	0.0077974	54
hexose metabolic process	2.75965e-05	0.0077974	44
cellular component disassembly	3.67914e-05	0.00866284	76
regulation of establishment of planar polarity	3.93191e-05	0.0088877	25
proteasomal protein catabolic process	4.38387e-05	0.00952817	62
ncRNA metabolic process	7.64243e-05	0.0141488	72
regulation of protein stability	7.76168e-05	0.0141488	47
regulation of mRNA stability	0.000122422	0.0172951	31
regulation of apoptotic signaling pathway	0.000136015	0.0183005	62
translational initiation	0.000179394	0.0201059	34
regulation of autophagosome assembly	0.000189028	0.0201059	11
viral gene expression	0.00019209	0.0201059	35
mitochondrial gene expression	0.000204236	0.0209086	29
viral transcription	0.000207199	0.0209086	33
cellular amino acid metabolic process	0.000216096	0.0214238	55
regulation of DNA-binding transcription factor activity	0.000229452	0.0219768	65
ribonucleoprotein complex biogenesis	0.000245382	0.0231109	59
mitochondrial transport	0.000258971	0.0239909	39
establishment of planar polarity	0.000304494	0.025682	25
establishment of tissue polarity	0.000304494	0.025682	25
non-canonical Wnt signaling pathway	0.000335185	0.0277882	28
response to unfolded protein	0.000397474	0.0307689	30
regulation of small molecule metabolic process	0.000437053	0.0333755	65
regulation of cellular ketone metabolic process	0.000501442	0.037782	32
positive regulation of catabolic process	0.00051813	0.0385257	59
negative regulation of organelle organization	0.000553533	0.0391769	54

## Sheet: UTRs
Description	pvalue	p.adjust	Count
G2/M transition of mitotic cell cycle	4.55166e-09	2.28857e-05	35
regulation of mitotic cell cycle phase transition	2.22603e-08	5.10151e-05	49
mitotic cell cycle checkpoint	4.05848e-08	5.10151e-05	25
regulation of cyclin-dependent protein kinase activity	1.53712e-07	0.00012881	18
cell cycle checkpoint	3.25185e-07	0.000233576	28
regulation of protein modification by small protein conjugation or removal	4.19826e-07	0.000263861	30
negative regulation of transferase activity	1.23435e-06	0.000564208	33
DNA damage checkpoint	6.4766e-06	0.00162822	20
protein polyubiquitination	1.14713e-05	0.00274656	32
establishment of protein localization to organelle	2.06857e-05	0.00433365	43
proteasomal protein catabolic process	2.33435e-05	0.00451427	38
histone modification	3.88937e-05	0.0069842	40
covalent chromatin modification	7.63782e-05	0.012801	40
gland morphogenesis	0.000152381	0.0225344	16
positive regulation of SMAD protein signal transduction	0.000158953	0.0228347	5
intrinsic apoptotic signaling pathway	0.000205234	0.0278897	28
mitotic nuclear division	0.000229922	0.0295191	25
regulation of cell growth	0.000234838	0.0295191	36
response to endoplasmic reticulum stress	0.000280239	0.0335487	26
regulation of DNA metabolic process	0.000328611	0.037674	36
positive regulation of cell cycle	0.000329685	0.037674	34
membrane docking	0.000360358	0.040264	18
regulation of hepatocyte proliferation	0.000370379	0.040484	5
filopodium assembly	0.000433552	0.0463809	10
nuclear transport	0.000446045	0.0466435	29
organelle fission	0.00045913	0.0466435	35
negative regulation of organelle assembly	0.000481564	0.0466435	8
organelle localization by membrane tethering	0.000491675	0.0466435	17
protein targeting to membrane	0.000493508	0.0466435	19

## Sheet: Introns
Description	pvalue	p.adjust	Count
cell cycle DNA replication	2.07027e-07	0.00115956	19
regulation of cytoskeleton organization	8.05262e-07	0.00219808	74
regulation of protein complex assembly	2.33275e-06	0.00219808	65
negative regulation of organelle organization	2.56281e-06	0.00219808	58
protein polyubiquitination	2.74711e-06	0.00219808	50
cell morphogenesis involved in neuron differentiation	3.68655e-06	0.00234052	75
establishment of cell polarity	3.99772e-06	0.00234052	28
negative regulation of protein phosphorylation	4.17875e-06	0.00234052	65
regulation of cell morphogenesis	6.49069e-06	0.00302953	66
actin filament organization	9.27277e-06	0.00346245	53
cellular response to peptide hormone stimulus	1.44874e-05	0.00489052	49
vascular endothelial growth factor receptor signaling pathway	1.48436e-05	0.00489052	22
RNA catabolic process	2.07743e-05	0.00636203	57
negative regulation of phosphorylation	2.2045e-05	0.00636203	67
cellular response to osmotic stress	2.35912e-05	0.00636203	13
response to peptide hormone	2.38534e-05	0.00636203	61
vacuole organization	2.52899e-05	0.00637088	27
regulation of microtubule-based process	2.65938e-05	0.00637088	36
nucleobase-containing small molecule biosynthetic process	4.17243e-05	0.00865548	37
cellular component disassembly	4.52045e-05	0.00904252	70
autophagosome organization	4.8276e-05	0.00925323	18
Golgi vesicle transport	5.57526e-05	0.00969294	48
microtubule cytoskeleton organization	5.71089e-05	0.00969294	66
nucleoside diphosphate metabolic process	6.58009e-05	0.0108397	29
error-prone translesion synthesis	7.12353e-05	0.0113997	8
regulation of organelle assembly	7.52658e-05	0.0114659	33
histone modification	7.57432e-05	0.0114659	61
nucleotide-excision repair, DNA gap filling	8.35368e-05	0.0119972	9
positive regulation of cell projection organization	9.48709e-05	0.0125721	54
autophagosome assembly	9.52512e-05	0.0125721	17
covalent chromatin modification	0.000100419	0.0127828	62
regulation of mRNA stability	0.000119378	0.0145356	29
negative regulation of transferase activity	0.000129192	0.0149554	43
myeloid cell differentiation	0.00013643	0.0149554	59
viral life cycle	0.000139892	0.0149554	49
growth plate cartilage development	0.000141375	0.0149554	7
cell growth	0.000149597	0.0154492	65
spindle localization	0.000151706	0.0154492	12
dephosphorylation	0.00015916	0.0159189	64
regulation of cell-substrate adhesion	0.000172752	0.0162982	34
regulation of cyclin-dependent protein kinase activity	0.000174264	0.0162982	19
positive regulation of autophagy of mitochondrion	0.000174592	0.0162982	8
establishment of spindle localization	0.000186343	0.016834	11
autophagy	0.000203326	0.0172269	65
process utilizing autophagic mechanism	0.000203326	0.0172269	65
vesicle docking involved in exocytosis	0.000221483	0.0174129	10
protein dephosphorylation	0.000224215	0.0174129	47
coenzyme biosynthetic process	0.000224836	0.0174129	39
response to osmotic stress	0.000238987	0.0176127	18
positive regulation of cellular catabolic process	0.000257842	0.0182192	50
regulation of cellular component size	0.000260228	0.0182192	47
regulation of binding	0.000269078	0.0183793	53
peptidyl-serine phosphorylation	0.000283828	0.0189252	37
positive regulation of neuron projection development	0.000292073	0.0192459	41
RNA localization	0.000334935	0.0210784	34
pyruvate biosynthetic process	0.000368397	0.0226617	22
pyridine-containing compound biosynthetic process	0.000383103	0.0226617	26
carbohydrate catabolic process	0.000387214	0.0226617	31
positive regulation of supramolecular fiber organization	0.000387214	0.0226617	31
tRNA export from nucleus	0.000392463	0.0226617	10
tRNA transport	0.000392463	0.0226617	10
tRNA-containing ribonucleoprotein complex export from nucleus	0.000392463	0.0226617	10
regulation of mitotic cell cycle phase transition	0.000402966	0.022849	59
positive regulation of catabolic process	0.000403866	0.022849	55
establishment of organelle localization	0.000449433	0.0249235	61
anatomical structure homeostasis	0.000486188	0.0259347	57
glycolytic process	0.000575873	0.0287988	21
organelle localization by membrane tethering	0.000584281	0.0289607	25
cell-cell signaling by wnt	0.000630435	0.0306981	66
vesicle-mediated transport between endosomal compartments	0.000649197	0.0306981	11
proteasome-mediated ubiquitin-dependent protein catabolic process	0.000650552	0.0306981	47
organophosphate catabolic process	0.000651696	0.0306981	35
developmental cell growth	0.000675574	0.0312718	34
intrinsic apoptotic signaling pathway	0.000732961	0.0331828	41
pyridine-containing compound metabolic process	0.000759702	0.0336373	30
negative regulation of interferon-beta production	0.000759762	0.0336373	6
interaction with host	0.000900119	0.0360112	33
negative regulation of sodium ion transmembrane transporter activity	0.000923898	0.0364419	5
regulation of carbohydrate catabolic process	0.000945519	0.0370339	17
regulation of nucleotide catabolic process	0.000980902	0.0376148	16
protein export from nucleus	0.00106629	0.0392913	27
cell cycle G2/M phase transition	0.00114491	0.0415099	38
negative regulation of cysteine-type endopeptidase activity involved in apoptotic process	0.00130824	0.0451952	16
regulation of cellular response to heat	0.00130824	0.0451952	16
bone growth	0.00133948	0.0451952	8
response to extracellular stimulus	0.00149302	0.047987	64
response to oxidative stress	0.00149933	0.047987	58
regulation of cell growth	0.00151762	0.0482967	53
4-hydroxyproline metabolic process	0.00157086	0.0488799	5
