# Supplementary material for: Whole-genome epigenetic function annotation through sgRNA libraries synthesized by controlled template-dependent elongation
Source: Research Square preprint supplement (doi:10.21203/rs.3.rs-100657/v1), 2020-11-05
Supplement: Supplementary file 3 [file TableS12.xlsx]

## Sheet: Exons
Description	pvalue	p.adjust	Count
ncRNA metabolic process	1.37269e-14	6.76734e-11	69
nucleotide-excision repair	7.64134e-08	3.90216e-05	21
histone modification	8.33028e-08	3.90216e-05	50
covalent chromatin modification	8.70666e-08	3.90216e-05	51
ncRNA transcription	4.98576e-07	0.000189075	20
telomere organization	8.06948e-07	0.000265217	26
telomere maintenance	2.08128e-06	0.000603571	24
in utero embryonic development	2.55381e-06	0.000699459	40
viral gene expression	3.38862e-06	0.000835295	27
anatomical structure homeostasis	4.19942e-06	0.000941051	45
regulation of mRNA metabolic process	1.10785e-05	0.00202285	33
positive regulation of catabolic process	2.92672e-05	0.00422314	41
ribonucleoprotein complex export from nucleus	4.05622e-05	0.00537907	18
regulation of cytoplasmic translation	4.15535e-05	0.00537907	8
regulation of autophagy of mitochondrion	4.3322e-05	0.00537907	10
ribonucleoprotein complex localization	4.55933e-05	0.00537907	18
post-translational protein modification	4.64972e-05	0.00537907	38
cellular response to radiation	4.75977e-05	0.00537907	23
mRNA export from nucleus	4.84507e-05	0.00537907	17
mRNA-containing ribonucleoprotein complex export from nucleus	4.84507e-05	0.00537907	17
regulation of mitotic cell cycle phase transition	4.9099e-05	0.00537907	43
endocytic recycling	5.41698e-05	0.00580559	10
regulation of autophagy	6.94095e-05	0.00712893	34
protein-containing complex localization	7.13681e-05	0.00717273	28
ribonucleoprotein complex biogenesis	7.27851e-05	0.00717273	39
response to ionizing radiation	7.86077e-05	0.00730339	20
regulation of endocytic recycling	8.53425e-05	0.00764979	5
regulation of hematopoietic stem cell differentiation	9.70216e-05	0.00854136	13
IRE1-mediated unfolded protein response	0.00010459	0.00873944	12
mitochondrial gene expression	0.00011565	0.0093468	20
ER-nucleus signaling pathway	0.000123649	0.00983206	10
regulation of chromosome organization	0.00013006	0.0101777	33
G2/M transition of mitotic cell cycle	0.000175579	0.012545	27
intracellular estrogen receptor signaling pathway	0.000209755	0.0143624	11
response to endoplasmic reticulum stress	0.000218201	0.014736	28
cell-substrate adhesion	0.000248868	0.0161437	33
gland development	0.000303566	0.0188486	40
RNA localization	0.000305859	0.0188486	24
macromolecule methylation	0.000382625	0.022727	29
autophagy	0.000409591	0.0237563	43
process utilizing autophagic mechanism	0.000409591	0.0237563	43
hematopoietic stem cell differentiation	0.000421479	0.0241615	13
regulation of stem cell differentiation	0.000428111	0.0242597	16
methylation	0.00053488	0.0273199	33
cellular component disassembly	0.000545496	0.0274418	44
positive regulation of cellular catabolic process	0.000692188	0.0318924	33
stem cell population maintenance	0.000755258	0.0329506	19
regulation of mRNA stability	0.000755258	0.0329506	19
positive regulation of myoblast fusion	0.00081314	0.0338821	5
cellular response to unfolded protein	0.000824236	0.0338821	16
cell cycle checkpoint	0.000833737	0.0339696	22
maintenance of cell number	0.000880865	0.0350041	19
positive regulation of actin filament bundle assembly	0.000887527	0.0350041	10
circadian rhythm	0.0010885	0.0419244	22
regulation of endoplasmic reticulum stress-induced intrinsic apoptotic signaling pathway	0.00123918	0.0451553	7
regulation of double-strand break repair via homologous recombination	0.00124963	0.0451553	8
spindle localization	0.00124963	0.0451553	8
auditory receptor cell stereocilium organization	0.00129623	0.0451553	4
circadian regulation of gene expression	0.0013281	0.0451553	10
cell adhesion mediated by integrin	0.0013281	0.0451553	10
positive regulation of protein catabolic process	0.00140961	0.0472878	21
cellular response to interleukin-4	0.00150149	0.0493459	7
neural tube development	0.00153627	0.0493459	18

## Sheet: Proximal promoter
Description	pvalue	p.adjust	Count
hematopoietic stem cell proliferation	8.28579e-07	0.0047171	11
regulation of cell morphogenesis	2.13945e-05	0.0425062	65
small GTPase mediated signal transduction	2.23992e-05	0.0425062	69

## Sheet: Introns
Description	pvalue	p.adjust	Count
regulation of GTPase activity	1.51084e-09	8.71153e-06	77
positive regulation of neuron differentiation	1.43024e-08	2.4304e-05	67
modulation of chemical synaptic transmission	1.51211e-08	2.4304e-05	72
regulation of trans-synaptic signaling	1.68602e-08	2.4304e-05	72
positive regulation of GTPase activity	2.96857e-08	2.74287e-05	64
ephrin receptor signaling pathway	3.59625e-08	2.74287e-05	26
synapse organization	3.80558e-08	2.74287e-05	71
cell morphogenesis involved in neuron differentiation	1.2181e-07	6.38504e-05	83
positive regulation of cell projection organization	1.63149e-07	7.23628e-05	65
cell-substrate adhesion	2.97404e-07	0.000122488	59
regulation of ion transmembrane transport	2.16631e-06	0.000657418	73
postsynapse organization	2.65891e-06	0.000766563	34
activation of protein kinase activity	4.92369e-06	0.00123435	53
calcium ion transmembrane transport	8.50209e-06	0.00199849	51
response to xenobiotic stimulus	8.665e-06	0.00199849	48
synaptic vesicle cycle	1.2679e-05	0.00281182	33
urogenital system development	1.69765e-05	0.00349595	54
response to alkaloid	3.14817e-05	0.00625944	24
neurotransmitter transport	4.98443e-05	0.00898132	42
synaptic vesicle localization	5.25929e-05	0.00918942	28
sensory organ morphogenesis	5.60451e-05	0.00923303	43
signal release	7.345e-05	0.0105878	65
positive regulation of phospholipid metabolic process	7.8986e-05	0.0105915	14
regulation of lipid metabolic process	8.87798e-05	0.0113402	61
regulation of cell-substrate adhesion	9.42967e-05	0.0113402	36
Golgi vesicle transport	9.6992e-05	0.0113402	49
signal release from synapse	0.00011127	0.0121053	29
cell growth	0.000121298	0.0126049	68
regulation of lipid kinase activity	0.000126496	0.012796	16
vesicle-mediated transport in synapse	0.000135737	0.0134942	32
developmental growth involved in morphogenesis	0.000160787	0.0154391	37
regulation of mesenchymal cell proliferation	0.00016477	0.0154391	11
multicellular organismal homeostasis	0.000177803	0.0158668	68
regulation of cytoskeleton organization	0.000177803	0.0158668	68
regulation of body fluid levels	0.000189106	0.0158668	71
regulation of cell morphogenesis	0.000189397	0.0158668	63
regulation of neurotransmitter levels	0.000195918	0.0158668	50
microtubule-based movement	0.000197543	0.0158668	38
response to nerve growth factor	0.000200804	0.0158668	13
cell-cell signaling by wnt	0.000200881	0.0158668	71
synaptic vesicle transport	0.000211283	0.0162434	25
establishment of synaptic vesicle localization	0.000211283	0.0162434	25
regulation of animal organ morphogenesis	0.000238893	0.0179454	41
regulation of membrane potential	0.000240543	0.0179454	56
neuron projection organization	0.000242757	0.0179454	19
artery development	0.000294471	0.0207064	21
epithelial cell morphogenesis	0.000334697	0.0222112	10
platelet activation	0.000336077	0.0222112	28
regulation of cell growth	0.00033698	0.0222112	58
regulation of supramolecular fiber organization	0.000374897	0.0232881	48
actin filament organization	0.000487329	0.0286728	49
ameboidal-type cell migration	0.000515106	0.029701	63
negative regulation of regulated secretory pathway	0.000532433	0.0303939	8
cellular response to xenobiotic stimulus	0.000537665	0.0303939	29
establishment or maintenance of cell polarity	0.00055213	0.0309086	30
cellular response to drug	0.000599983	0.0329477	53
maternal process involved in female pregnancy	0.000626145	0.0334292	15
cellular response to amino acid stimulus	0.000626145	0.0334292	15
sensory perception of mechanical stimulus	0.000710532	0.0370547	28
alcohol metabolic process	0.000713859	0.0370547	50
learning or memory	0.000719691	0.0370547	39
cellular response to peptide hormone stimulus	0.000728888	0.0370547	45
cellular response to retinoic acid	0.000745117	0.0370547	15
regulation of cytosolic calcium ion concentration	0.000749515	0.0370547	44
cellular response to acid chemical	0.000758317	0.0370547	33
response to anesthetic	0.000782922	0.0379355	16
regulation of transporter activity	0.000826162	0.0390463	40
muscle contraction	0.000930147	0.042833	50
protein autophosphorylation	0.000981257	0.0430233	34
cellular response to alkaloid	0.000981859	0.0430233	10
transcription initiation from RNA polymerase II promoter	0.000984926	0.0430233	30
regulation of cholesterol storage	0.00099518	0.0431444	6
connective tissue development	0.00100505	0.0432473	38
calcium ion homeostasis	0.0010406	0.0441183	55
maintenance of location	0.00110513	0.0465124	43
olfactory behavior	0.00116562	0.0483522	5
mammary gland duct morphogenesis	0.00119244	0.0489393	9
response to acid chemical	0.00121918	0.0495054	48
