# Supplementary material for: Whole-genome epigenetic function annotation through sgRNA libraries synthesized by controlled template-dependent elongation
Source: Research Square preprint supplement (doi:10.21203/rs.3.rs-100657/v1), 2020-11-05
Supplement: Supplementary file 4 [file TableS13.xlsx]

## Sheet: Human cell lines
Human cell lines
22Rv1
A549
A673
AG04450
AG09309
AG09319
AG10803
BE2C
BJ
C4-2B
Caco-2
D721Med
DOHH2
GM06990
GM10248
GM10266
GM12801
GM12864
GM12865
GM12873
GM12874
GM12875
GM12878
GM13976
GM13977
GM20000
GM23338
H1
H54
HCT116
HEK293
HeLa-S3
HFF-Myc
HL-60
IMR-90
K562
KMS-11
LNCAP
MCF-7
MM.1S
NB4
NCI-H929
OCI-LY1
OCI-LY3
OCI-LY7
Panc1
PC-3
PC-9
RWPE1
RWPE2
SK-N-SH
SU-DHL-6
VCaP
WERI-Rb-1
WI38

## Sheet: Identify peaks
Chr	Start	End	Frequency shared in cell lines	Specific/Common
chr1	15177227	15177361	33	cell-type specific
chr1	2063757	2063901	33	cell-type specific
chr1	35909783	35909917	33	cell-type specific
chr1	38231839	38232002	33	cell-type specific
chr1	39853278	39853472	33	cell-type specific
chr1	41489032	41489166	33	cell-type specific
chr1	41889198	41889371	33	cell-type specific
chr1	42065725	42065866	33	cell-type specific
chr1	5658732	5658876	33	cell-type specific
chr1	6142433	6142657	33	cell-type specific
chr1	65327327	65327501	33	cell-type specific
chr1	86048235	86048369	33	cell-type specific
chr1	8799555	8799720	33	cell-type specific
chr1	94795602	94795853	33	cell-type specific
chr10	110009793	110010039	33	cell-type specific
chr10	132139654	132139867	33	cell-type specific
chr10	26839759	26839939	33	cell-type specific
chr10	34538657	34538854	33	cell-type specific
chr10	49743976	49744129	33	cell-type specific
chr10	75173841	75174012	33	cell-type specific
chr10	77353451	77353669	33	cell-type specific
chr10	77411368	77411516	33	cell-type specific
chr10	79649913	79650102	33	cell-type specific
chr10	82271283	82271417	33	cell-type specific
chr10	834982	835228	33	cell-type specific
chr10	84694294	84694439	33	cell-type specific
chr10	85873935	85874089	33	cell-type specific
chr10	86294060	86294209	33	cell-type specific
chr10	86333991	86334168	33	cell-type specific
chr10	99093216	99093350	33	cell-type specific
chr10	99445503	99445642	33	cell-type specific
chr11	107628509	107628649	33	cell-type specific
chr11	120382333	120382490	33	cell-type specific
chr11	125127232	125127380	33	cell-type specific
chr11	13136575	13136721	33	cell-type specific
chr11	17791614	17791807	33	cell-type specific
chr11	20776647	20776805	33	cell-type specific
chr11	3216540	3216710	33	cell-type specific
chr11	3602475	3602637	33	cell-type specific
chr11	838486	838720	33	cell-type specific
chr12	116336610	116336751	33	cell-type specific
chr12	117669646	117669780	33	cell-type specific
chr12	129309243	129309398	33	cell-type specific
chr12	14135134	14135268	33	cell-type specific
chr12	77529	77728	33	cell-type specific
chr13	104535474	104535696	33	cell-type specific
chr13	19728310	19728485	33	cell-type specific
chr13	25980701	25980856	33	cell-type specific
chr13	29680036	29680189	33	cell-type specific
chr13	45937139	45937308	33	cell-type specific
chr13	87219500	87219666	33	cell-type specific
chr14	107137697	107137871	33	cell-type specific
chr14	53308174	53308308	33	cell-type specific
chr14	69408616	69408753	33	cell-type specific
chr14	74129194	74129394	33	cell-type specific
chr14	76267305	76267578	33	cell-type specific
chr15	70473704	70473940	33	cell-type specific
chr15	72633868	72634004	33	cell-type specific
chr15	80952543	80952715	33	cell-type specific
chr15	89454358	89454517	33	cell-type specific
chr16	15116201	15116357	33	cell-type specific
chr16	18990806	18990940	33	cell-type specific
chr16	230332	230515	33	cell-type specific
chr16	35143447	35143581	33	cell-type specific
chr16	5289639	5289799	33	cell-type specific
chr16	67298410	67298544	33	cell-type specific
chr16	67647810	67647985	33	cell-type specific
chr16	70842439	70842586	33	cell-type specific
chr16	71586749	71586887	33	cell-type specific
chr16	84174897	84175099	33	cell-type specific
chr16	85061098	85061262	33	cell-type specific
chr16	85786764	85786962	33	cell-type specific
chr16	88058226	88058374	33	cell-type specific
chr17	11784146	11784293	33	cell-type specific
chr17	1546754	1546910	33	cell-type specific
chr17	25821319	25821533	33	cell-type specific
chr17	34309140	34309299	33	cell-type specific
chr17	3626824	3626982	33	cell-type specific
chr17	39019309	39019468	33	cell-type specific
chr17	4718716	4718877	33	cell-type specific
chr17	47976612	47976767	33	cell-type specific
chr17	53254647	53254807	33	cell-type specific
chr17	61514179	61514363	33	cell-type specific
chr17	62294137	62294332	33	cell-type specific
chr17	6616766	6617015	33	cell-type specific
chr17	66288612	66288854	33	cell-type specific
chr17	72812260	72812396	33	cell-type specific
chr17	74883995	74884165	33	cell-type specific
chr18	14415897	14416047	33	cell-type specific
chr18	6401796	6401930	33	cell-type specific
chr18	65378039	65378184	33	cell-type specific
chr18	68245817	68246006	33	cell-type specific
chr18	7272367	7272501	33	cell-type specific
chr18	74192974	74193108	33	cell-type specific
chr18	77958225	77958390	33	cell-type specific
chr19	15565184	15565348	33	cell-type specific
chr19	21439599	21439744	33	cell-type specific
chr19	28730344	28730478	33	cell-type specific
chr19	3879755	3879895	33	cell-type specific
chr19	38932442	38932576	33	cell-type specific
chr19	51615000	51615134	33	cell-type specific
chr19	550163	550297	33	cell-type specific
chr19	8219015	8219154	33	cell-type specific
chr19	8400560	8400738	33	cell-type specific
chr2	100232099	100232233	33	cell-type specific
chr2	102018515	102018649	33	cell-type specific
chr2	10379895	10380088	33	cell-type specific
chr2	113799589	113799769	33	cell-type specific
chr2	135540415	135540614	33	cell-type specific
chr2	137854354	137854574	33	cell-type specific
chr2	170532986	170533151	33	cell-type specific
chr2	175010652	175010824	33	cell-type specific
chr2	208632676	208632820	33	cell-type specific
chr2	20866612	20866830	33	cell-type specific
chr2	215175744	215175938	33	cell-type specific
chr2	225476754	225476890	33	cell-type specific
chr2	227990338	227990488	33	cell-type specific
chr2	27543923	27544095	33	cell-type specific
chr2	38751022	38751185	33	cell-type specific
chr2	44125523	44125736	33	cell-type specific
chr2	60886288	60886453	33	cell-type specific
chr2	95688989	95689165	33	cell-type specific
chr20	1190198	1190332	33	cell-type specific
chr20	19037587	19037781	33	cell-type specific
chr20	30327176	30327688	33	cell-type specific
chr20	32103522	32103675	33	cell-type specific
chr20	35459437	35459620	33	cell-type specific
chr20	48807493	48807657	33	cell-type specific
chr20	50677743	50677926	33	cell-type specific
chr20	56009549	56009695	33	cell-type specific
chr20	60299606	60299787	33	cell-type specific
chr20	6164811	6164986	33	cell-type specific
chr20	62854834	62855031	33	cell-type specific
chr21	37851324	37851496	33	cell-type specific
chr21	43546166	43546331	33	cell-type specific
chr22	26715132	26715271	33	cell-type specific
chr22	28078491	28078625	33	cell-type specific
chr22	43932983	43933162	33	cell-type specific
chr22	49339697	49339928	33	cell-type specific
chr3	10328678	10328845	33	cell-type specific
chr3	125640721	125640867	33	cell-type specific
chr3	133845119	133845259	33	cell-type specific
chr3	142575944	142576159	33	cell-type specific
chr3	154270281	154270415	33	cell-type specific
chr3	169780581	169780715	33	cell-type specific
chr3	170886060	170886249	33	cell-type specific
chr3	195749009	195749147	33	cell-type specific
chr3	197252675	197252855	33	cell-type specific
chr4	103544922	103545067	33	cell-type specific
chr4	140690119	140690266	33	cell-type specific
chr4	1514932	1515208	33	cell-type specific
chr4	165938207	165938415	33	cell-type specific
chr4	179499195	179499347	33	cell-type specific
chr4	184642537	184642760	33	cell-type specific
chr4	187870223	187870359	33	cell-type specific
chr4	26134602	26134742	33	cell-type specific
chr4	33091524	33091719	33	cell-type specific
chr4	6345654	6345827	33	cell-type specific
chr4	8588449	8588627	33	cell-type specific
chr4	99916837	99916978	33	cell-type specific
chr5	127830347	127830481	33	cell-type specific
chr5	134346852	134347001	33	cell-type specific
chr5	56391342	56391512	33	cell-type specific
chr5	903296	903452	33	cell-type specific
chr6	122720466	122720613	33	cell-type specific
chr6	1313959	1314133	33	cell-type specific
chr6	143020030	143020164	33	cell-type specific
chr6	143381653	143381787	33	cell-type specific
chr6	155473428	155473666	33	cell-type specific
chr6	157460533	157460746	33	cell-type specific
chr6	159050417	159050564	33	cell-type specific
chr6	168461244	168461446	33	cell-type specific
chr6	40842421	40842555	33	cell-type specific
chr6	40989742	40989899	33	cell-type specific
chr6	50348881	50349015	33	cell-type specific
chr6	55918642	55918790	33	cell-type specific
chr6	56860257	56860428	33	cell-type specific
chr6	79577631	79577817	33	cell-type specific
chr6	90021489	90021664	33	cell-type specific
chr7	104681754	104681928	33	cell-type specific
chr7	105670505	105670770	33	cell-type specific
chr7	121038521	121038655	33	cell-type specific
chr7	134001896	134002041	33	cell-type specific
chr7	154376437	154376585	33	cell-type specific
chr7	27176102	27176295	33	cell-type specific
chr7	49227599	49227733	33	cell-type specific
chr7	57373033	57373167	33	cell-type specific
chr7	71799200	71799334	33	cell-type specific
chr7	77068945	77069147	33	cell-type specific
chr7	77089631	77089808	33	cell-type specific
chr7	79728254	79728388	33	cell-type specific
chr7	94674963	94675144	33	cell-type specific
chr8	100819018	100819175	33	cell-type specific
chr8	10671801	10671953	33	cell-type specific
chr8	111834424	111834598	33	cell-type specific
chr8	113819124	113819287	33	cell-type specific
chr8	117715438	117715572	33	cell-type specific
chr8	143534208	143534361	33	cell-type specific
chr8	3584770	3584960	33	cell-type specific
chr8	89911104	89911253	33	cell-type specific
chr9	111519153	111519366	33	cell-type specific
chr9	115468176	115468310	33	cell-type specific
chr9	133293164	133293298	33	cell-type specific
chr9	17794374	17794524	33	cell-type specific
chr9	35452573	35452721	33	cell-type specific
chr9	98104037	98104171	33	cell-type specific
chr9	99448976	99449119	33	cell-type specific
chrX	134821986	134822120	33	cell-type specific
chrX	135055274	135055446	33	cell-type specific
chrX	139779919	139780060	33	cell-type specific
chrX	146631874	146632018	33	cell-type specific
chrX	19533650	19533806	33	cell-type specific
chr1	120217519	120217735	32	cell-type specific
chr1	144859844	144860016	32	cell-type specific
chr1	145061911	145062051	32	cell-type specific
chr1	16066327	16066506	32	cell-type specific
chr1	162200059	162200224	32	cell-type specific
chr1	165737900	165738090	32	cell-type specific
chr1	18023058	18023192	32	cell-type specific
chr1	202182644	202182789	32	cell-type specific
chr1	218085416	218085553	32	cell-type specific
chr1	224828870	224829022	32	cell-type specific
chr1	30881610	30881788	32	cell-type specific
chr1	32914840	32914996	32	cell-type specific
chr1	53651486	53651640	32	cell-type specific
chr1	57890286	57890480	32	cell-type specific
chr1	6140736	6140890	32	cell-type specific
chr1	68166608	68166817	32	cell-type specific
chr1	714184	714339	32	cell-type specific
chr1	8002460	8002594	32	cell-type specific
chr1	91872452	91872631	32	cell-type specific
chr10	102586827	102586971	32	cell-type specific
chr10	104998727	104998873	32	cell-type specific
chr10	115580398	115580532	32	cell-type specific
chr10	116853297	116853650	32	cell-type specific
chr10	121403980	121404135	32	cell-type specific
chr10	1402307	1402479	32	cell-type specific
chr10	15413336	15413531	32	cell-type specific
chr10	24752151	24752298	32	cell-type specific
chr10	25812006	25812140	32	cell-type specific
chr10	29228245	29228485	32	cell-type specific
chr10	333931	334065	32	cell-type specific
chr10	71728717	71728858	32	cell-type specific
chr10	75758950	75759127	32	cell-type specific
chr10	93403560	93403738	32	cell-type specific
chr11	115401588	115401761	32	cell-type specific
chr11	116711147	116711282	32	cell-type specific
chr11	133446370	133446504	32	cell-type specific
chr11	133781173	133781373	32	cell-type specific
chr11	19975604	19975755	32	cell-type specific
chr11	55494300	55494451	32	cell-type specific
chr11	63044948	63045111	32	cell-type specific
chr11	64828730	64828902	32	cell-type specific
chr11	76572130	76572555	32	cell-type specific
chr12	103333696	103333924	32	cell-type specific
chr12	112699506	112699658	32	cell-type specific
chr12	113754056	113754190	32	cell-type specific
chr12	116715585	116715726	32	cell-type specific
chr12	132335881	132336051	32	cell-type specific
chr12	132486143	132486332	32	cell-type specific
chr12	50368039	50368241	32	cell-type specific
chr12	63220972	63221115	32	cell-type specific
chr12	68800148	68800318	32	cell-type specific
chr12	76017646	76017852	32	cell-type specific
chr12	8690463	8690597	32	cell-type specific
chr12	96252871	96253094	32	cell-type specific
chr13	30929586	30929780	32	cell-type specific
chr13	46015835	46015971	32	cell-type specific
chr14	100883891	100884025	32	cell-type specific
chr14	105667808	105667942	32	cell-type specific
chr14	107210759	107210968	32	cell-type specific
chr14	28764205	28764339	32	cell-type specific
chr14	29554902	29555047	32	cell-type specific
chr15	29657023	29657188	32	cell-type specific
chr15	35272814	35273025	32	cell-type specific
chr15	52019820	52019956	32	cell-type specific
chr15	55856638	55856811	32	cell-type specific
chr15	66526541	66526675	32	cell-type specific
chr15	88167212	88167346	32	cell-type specific
chr16	24057095	24057259	32	cell-type specific
chr16	29955224	29955392	32	cell-type specific
chr16	49924872	49925041	32	cell-type specific
chr16	55055846	55056049	32	cell-type specific
chr16	67062464	67062646	32	cell-type specific
chr17	11200427	11200579	32	cell-type specific
chr17	17854247	17854381	32	cell-type specific
chr17	17908399	17908533	32	cell-type specific
chr17	47693560	47693698	32	cell-type specific
chr17	70475402	70475578	32	cell-type specific
chr17	73585569	73585778	32	cell-type specific
chr17	75277162	75277337	32	cell-type specific
chr17	76134121	76134285	32	cell-type specific
chr17	78451898	78452068	32	cell-type specific
chr17	80308226	80308369	32	cell-type specific
chr18	30249628	30249794	32	cell-type specific
chr18	32707256	32707470	32	cell-type specific
chr18	47807824	47807979	32	cell-type specific
chr18	76419870	76420004	32	cell-type specific
chr18	77113328	77113493	32	cell-type specific
chr19	2171425	2171563	32	cell-type specific
chr19	34438595	34438772	32	cell-type specific
chr19	42391901	42392035	32	cell-type specific
chr19	46553065	46553199	32	cell-type specific
chr19	49316929	49317063	32	cell-type specific
chr19	50511884	50512063	32	cell-type specific
chr19	54683821	54683982	32	cell-type specific
chr19	6393094	6393228	32	cell-type specific
chr2	105742038	105742172	32	cell-type specific
chr2	113991799	113991981	32	cell-type specific
chr2	121802065	121802250	32	cell-type specific
chr2	130694060	130694215	32	cell-type specific
chr2	135548151	135548304	32	cell-type specific
chr2	178062922	178063087	32	cell-type specific
chr2	197504487	197504647	32	cell-type specific
chr2	197583870	197584053	32	cell-type specific
chr2	198479936	198480077	32	cell-type specific
chr2	202209822	202209982	32	cell-type specific
chr2	209133937	209134132	32	cell-type specific
chr2	237086337	237086488	32	cell-type specific
chr2	240318929	240319074	32	cell-type specific
chr2	25264269	25264410	32	cell-type specific
chr2	27524353	27524513	32	cell-type specific
chr2	42612380	42612609	32	cell-type specific
chr2	55290890	55291100	32	cell-type specific
chr2	65116163	65116336	32	cell-type specific
chr2	68082075	68082209	32	cell-type specific
chr2	86477267	86477434	32	cell-type specific
chr2	89240805	89240984	32	cell-type specific
chr2	97215794	97215986	32	cell-type specific
chr20	33166970	33167165	32	cell-type specific
chr20	35176511	35176675	32	cell-type specific
chr20	39335672	39335849	32	cell-type specific
chr20	40833011	40833191	32	cell-type specific
chr20	41731160	41731294	32	cell-type specific
chr20	49330334	49330561	32	cell-type specific
chr20	50384062	50384337	32	cell-type specific
chr20	52210627	52210798	32	cell-type specific
chr20	56603372	56603506	32	cell-type specific
chr20	58220898	58221074	32	cell-type specific
chr20	6362647	6362788	32	cell-type specific
chr21	16236669	16236822	32	cell-type specific
chr21	31444925	31445059	32	cell-type specific
chr21	43994861	43995054	32	cell-type specific
chr22	29186225	29186362	32	cell-type specific
chr22	43088583	43088727	32	cell-type specific
chr22	45858260	45858425	32	cell-type specific
chr3	110731592	110731730	32	cell-type specific
chr3	120341969	120342153	32	cell-type specific
chr3	137128517	137128654	32	cell-type specific
chr3	142650234	142650370	32	cell-type specific
chr3	182665864	182665998	32	cell-type specific
chr3	49453093	49453235	32	cell-type specific
chr3	58408771	58408932	32	cell-type specific
chr3	63350702	63350855	32	cell-type specific
chr3	94243996	94244151	32	cell-type specific
chr3	97483583	97483778	32	cell-type specific
chr4	109434448	109434589	32	cell-type specific
chr4	114169617	114169758	32	cell-type specific
chr4	157031113	157031248	32	cell-type specific
chr4	16766363	16766501	32	cell-type specific
chr4	184679579	184679727	32	cell-type specific
chr4	187867896	187868117	32	cell-type specific
chr4	35910380	35910514	32	cell-type specific
chr4	47465343	47465706	32	cell-type specific
chr5	1134766	1134943	32	cell-type specific
chr5	137746835	137746969	32	cell-type specific
chr5	140174958	140175108	32	cell-type specific
chr5	167792696	167792854	32	cell-type specific
chr5	6202820	6202978	32	cell-type specific
chr5	75699699	75699834	32	cell-type specific
chr6	128808327	128808505	32	cell-type specific
chr6	13847103	13847237	32	cell-type specific
chr6	158808188	158808322	32	cell-type specific
chr6	168533698	168533845	32	cell-type specific
chr6	17104097	17104238	32	cell-type specific
chr6	33780575	33780736	32	cell-type specific
chr7	127268588	127268736	32	cell-type specific
chr7	16460670	16461024	32	cell-type specific
chr7	1680130	1680264	32	cell-type specific
chr7	38381025	38381182	32	cell-type specific
chr7	47847498	47847632	32	cell-type specific
chr7	65606041	65606210	32	cell-type specific
chr7	6566141	6566332	32	cell-type specific
chr8	101859750	101859900	32	cell-type specific
chr8	107630140	107630307	32	cell-type specific
chr8	115183171	115183313	32	cell-type specific
chr8	121880984	121881150	32	cell-type specific
chr8	1273444	1273629	32	cell-type specific
chr8	138946809	138946974	32	cell-type specific
chr8	18871917	18872116	32	cell-type specific
chr8	58122134	58122394	32	cell-type specific
chr8	98387954	98388124	32	cell-type specific
chr8	98868891	98869029	32	cell-type specific
chr9	140172138	140172328	32	cell-type specific
chr9	33229357	33229568	32	cell-type specific
chr9	38620962	38621151	32	cell-type specific
chr9	77813431	77813627	32	cell-type specific
chr9	81319182	81319400	32	cell-type specific
chr9	91711833	91712039	32	cell-type specific
chrX	118924917	118925131	32	cell-type specific
chrX	141891911	141892076	32	cell-type specific
chrX	149705283	149705417	32	cell-type specific
chrX	153150083	153150236	32	cell-type specific
chrX	2730631	2730772	32	cell-type specific
chr1	145293406	145293540	31	cell-type specific
chr1	14761867	14762057	31	cell-type specific
chr1	14864951	14865098	31	cell-type specific
chr1	164061908	164062066	31	cell-type specific
chr1	164135789	164135995	31	cell-type specific
chr1	178331053	178331239	31	cell-type specific
chr1	228870975	228871163	31	cell-type specific
chr1	24125143	24125284	31	cell-type specific
chr1	43156602	43156759	31	cell-type specific
chr1	46646056	46646190	31	cell-type specific
chr1	85748305	85748451	31	cell-type specific
chr1	94316413	94316573	31	cell-type specific
chr1	95065122	95065317	31	cell-type specific
chr10	111952381	111952515	31	cell-type specific
chr10	113786314	113786485	31	cell-type specific
chr10	26823436	26823570	31	cell-type specific
chr10	35512062	35512196	31	cell-type specific
chr10	60145321	60145464	31	cell-type specific
chr10	68037385	68037532	31	cell-type specific
chr10	81262337	81262489	31	cell-type specific
chr10	85819403	85819537	31	cell-type specific
chr10	87546157	87546316	31	cell-type specific
chr10	88343877	88344011	31	cell-type specific
chr11	102180987	102181199	31	cell-type specific
chr11	117187017	117187167	31	cell-type specific
chr11	121250007	121250188	31	cell-type specific
chr11	130016300	130016504	31	cell-type specific
chr11	1324716	1324854	31	cell-type specific
chr11	44009720	44009873	31	cell-type specific
chr11	440307	440441	31	cell-type specific
chr11	61537121	61537255	31	cell-type specific
chr11	63702042	63702219	31	cell-type specific
chr11	64616425	64616559	31	cell-type specific
chr11	67169318	67169452	31	cell-type specific
chr11	69476921	69477056	31	cell-type specific
chr11	76092020	76092220	31	cell-type specific
chr11	76549838	76550015	31	cell-type specific
chr11	95889119	95889260	31	cell-type specific
chr11	95974554	95974744	31	cell-type specific
chr12	109693289	109693486	31	cell-type specific
chr12	110157253	110157417	31	cell-type specific
chr12	124018450	124018610	31	cell-type specific
chr12	31165300	31165492	31	cell-type specific
chr12	51646403	51646537	31	cell-type specific
chr12	52306986	52307120	31	cell-type specific
chr12	58129759	58129921	31	cell-type specific
chr12	6485857	6486005	31	cell-type specific
chr13	114782594	114782728	31	cell-type specific
chr13	46159074	46159249	31	cell-type specific
chr13	86471287	86471421	31	cell-type specific
chr13	89767671	89767805	31	cell-type specific
chr13	95266473	95266626	31	cell-type specific
chr14	28844571	28844796	31	cell-type specific
chr14	34529573	34529707	31	cell-type specific
chr14	37667376	37667512	31	cell-type specific
chr14	49931763	49931897	31	cell-type specific
chr14	55032419	55032553	31	cell-type specific
chr14	58739353	58739487	31	cell-type specific
chr15	40345522	40345658	31	cell-type specific
chr16	29910947	29911122	31	cell-type specific
chr16	30809313	30809447	31	cell-type specific
chr16	33605690	33605838	31	cell-type specific
chr16	62247760	62248005	31	cell-type specific
chr16	69117554	69117688	31	cell-type specific
chr16	709308	709442	31	cell-type specific
chr16	76888262	76888407	31	cell-type specific
chr16	85668815	85668974	31	cell-type specific
chr16	87911546	87911704	31	cell-type specific
chr16	88343669	88343803	31	cell-type specific
chr16	89733542	89733676	31	cell-type specific
chr16	89859638	89859800	31	cell-type specific
chr17	18855242	18855448	31	cell-type specific
chr17	25365866	25366033	31	cell-type specific
chr17	30241811	30241965	31	cell-type specific
chr17	42522941	42523101	31	cell-type specific
chr17	46306204	46306338	31	cell-type specific
chr17	72915648	72915787	31	cell-type specific
chr17	72959957	72960109	31	cell-type specific
chr17	76685198	76685407	31	cell-type specific
chr17	77024722	77024857	31	cell-type specific
chr17	80087094	80087267	31	cell-type specific
chr17	9579551	9579698	31	cell-type specific
chr18	11653	11971	31	cell-type specific
chr18	3441410	3441591	31	cell-type specific
chr18	45458156	45458320	31	cell-type specific
chr19	1445625	1445777	31	cell-type specific
chr19	15921321	15921484	31	cell-type specific
chr19	43608480	43608630	31	cell-type specific
chr19	50308411	50308612	31	cell-type specific
chr19	55644259	55644429	31	cell-type specific
chr19	56732981	56733171	31	cell-type specific
chr19	58883846	58883987	31	cell-type specific
chr2	10328408	10328668	31	cell-type specific
chr2	109033827	109034003	31	cell-type specific
chr2	131722202	131722364	31	cell-type specific
chr2	139789519	139789663	31	cell-type specific
chr2	176829046	176829222	31	cell-type specific
chr2	177921299	177921433	31	cell-type specific
chr2	182446367	182446546	31	cell-type specific
chr2	20876199	20876406	31	cell-type specific
chr2	22346983	22347203	31	cell-type specific
chr2	237227857	237227991	31	cell-type specific
chr2	29179304	29179460	31	cell-type specific
chr2	50571759	50571893	31	cell-type specific
chr2	65580343	65580508	31	cell-type specific
chr2	74366197	74366364	31	cell-type specific
chr2	86902781	86903032	31	cell-type specific
chr20	1094849	1095027	31	cell-type specific
chr20	16647041	16647201	31	cell-type specific
chr20	25650908	25651081	31	cell-type specific
chr20	32485457	32485658	31	cell-type specific
chr20	33293289	33293444	31	cell-type specific
chr20	4205061	4205202	31	cell-type specific
chr20	45336814	45336976	31	cell-type specific
chr20	48750529	48750663	31	cell-type specific
chr21	19741430	19741597	31	cell-type specific
chr21	42417691	42417874	31	cell-type specific
chr21	44775746	44775996	31	cell-type specific
chr21	45797339	45797487	31	cell-type specific
chr21	46962273	46962407	31	cell-type specific
chr22	18020305	18020467	31	cell-type specific
chr22	19629014	19629154	31	cell-type specific
chr22	30886488	30886632	31	cell-type specific
chr22	39114573	39114707	31	cell-type specific
chr22	47135085	47135297	31	cell-type specific
chr22	47521594	47521748	31	cell-type specific
chr22	49178847	49179100	31	cell-type specific
chr22	51014601	51014791	31	cell-type specific
chr3	10785860	10785996	31	cell-type specific
chr3	122913433	122913622	31	cell-type specific
chr3	139812121	139812256	31	cell-type specific
chr3	18486652	18486802	31	cell-type specific
chr3	186440301	186440437	31	cell-type specific
chr3	187427077	187427211	31	cell-type specific
chr3	193281913	193282102	31	cell-type specific
chr3	19730396	19730537	31	cell-type specific
chr3	27147633	27147767	31	cell-type specific
chr3	38323534	38323696	31	cell-type specific
chr3	43732466	43732600	31	cell-type specific
chr4	103652414	103652578	31	cell-type specific
chr4	119961054	119961213	31	cell-type specific
chr4	157893168	157893302	31	cell-type specific
chr4	2537151	2537285	31	cell-type specific
chr4	3516643	3516777	31	cell-type specific
chr4	3951760	3951924	31	cell-type specific
chr5	145239571	145239757	31	cell-type specific
chr5	149953967	149954138	31	cell-type specific
chr5	171880235	171880396	31	cell-type specific
chr5	38515857	38516019	31	cell-type specific
chr5	73690536	73690670	31	cell-type specific
chr5	77361628	77361796	31	cell-type specific
chr5	990406	990565	31	cell-type specific
chr6	111348551	111348685	31	cell-type specific
chr6	115866598	115866763	31	cell-type specific
chr6	120041457	120041591	31	cell-type specific
chr6	149805878	149806069	31	cell-type specific
chr6	166648744	166648882	31	cell-type specific
chr6	167897829	167897995	31	cell-type specific
chr6	34941401	34941569	31	cell-type specific
chr6	66348053	66348224	31	cell-type specific
chr6	89434845	89434992	31	cell-type specific
chr7	36352268	36352479	31	cell-type specific
chr7	77619281	77619440	31	cell-type specific
chr7	90089315	90089471	31	cell-type specific
chr7	91677830	91678000	31	cell-type specific
chr7	99229380	99229558	31	cell-type specific
chr7	994270	994426	31	cell-type specific
chr8	143070013	143070177	31	cell-type specific
chr8	145060285	145060465	31	cell-type specific
chr8	145758153	145758365	31	cell-type specific
chr8	17612658	17612803	31	cell-type specific
chr8	1926239	1926398	31	cell-type specific
chr8	53436093	53436227	31	cell-type specific
chr8	62637391	62637562	31	cell-type specific
chr8	99032239	99032373	31	cell-type specific
chr8	99939090	99939224	31	cell-type specific
chr9	112203714	112203848	31	cell-type specific
chr9	129361418	129361582	31	cell-type specific
chr9	130564748	130564882	31	cell-type specific
chr9	140995534	140995699	31	cell-type specific
chr9	21141451	21141626	31	cell-type specific
chr9	5773696	5773853	31	cell-type specific
chr9	84137689	84137922	31	cell-type specific
chrX	118673933	118674067	31	cell-type specific
chrX	147174620	147174797	31	cell-type specific
chrX	50191780	50191921	31	cell-type specific
chr1	10622117	10622288	30	cell-type specific
chr1	12074430	12074578	30	cell-type specific
chr1	16029725	16029902	30	cell-type specific
chr1	160791528	160791687	30	cell-type specific
chr1	161147602	161147743	30	cell-type specific
chr1	16302083	16302274	30	cell-type specific
chr1	201432288	201432438	30	cell-type specific
chr1	202531370	202531507	30	cell-type specific
chr1	204498530	204498720	30	cell-type specific
chr1	204570173	204570370	30	cell-type specific
chr1	228496893	228497027	30	cell-type specific
chr1	229407436	229407570	30	cell-type specific
chr1	236723666	236723849	30	cell-type specific
chr1	25071348	25071492	30	cell-type specific
chr1	25850149	25850295	30	cell-type specific
chr1	29451080	29451236	30	cell-type specific
chr1	3326782	3327003	30	cell-type specific
chr1	6159938	6160072	30	cell-type specific
chr1	88064160	88064352	30	cell-type specific
chr1	92083148	92083319	30	cell-type specific
chr10	102577412	102577546	30	cell-type specific
chr10	104474590	104474845	30	cell-type specific
chr10	129291159	129291417	30	cell-type specific
chr10	26446798	26446960	30	cell-type specific
chr10	35113834	35114060	30	cell-type specific
chr10	61435707	61435853	30	cell-type specific
chr10	62493117	62493361	30	cell-type specific
chr10	80697557	80697711	30	cell-type specific
chr10	87077724	87077912	30	cell-type specific
chr11	10472718	10472909	30	cell-type specific
chr11	60534866	60535022	30	cell-type specific
chr11	71040105	71040244	30	cell-type specific
chr11	71350302	71350498	30	cell-type specific
chr11	72165925	72166104	30	cell-type specific
chr11	75479802	75479941	30	cell-type specific
chr11	86343900	86344052	30	cell-type specific
chr12	18129270	18129404	30	cell-type specific
chr12	65002084	65002222	30	cell-type specific
chr13	100418921	100419060	30	cell-type specific
chr13	112157658	112157803	30	cell-type specific
chr13	114027329	114027618	30	cell-type specific
chr13	21297603	21297737	30	cell-type specific
chr13	77891349	77891546	30	cell-type specific
chr13	99002307	99002451	30	cell-type specific
chr14	39886318	39886462	30	cell-type specific
chr14	73509917	73510101	30	cell-type specific
chr14	74005769	74006044	30	cell-type specific
chr14	77030898	77031032	30	cell-type specific
chr14	83338922	83339103	30	cell-type specific
chr15	100332430	100332699	30	cell-type specific
chr15	70877637	70877859	30	cell-type specific
chr15	82824912	82825075	30	cell-type specific
chr15	92850046	92850180	30	cell-type specific
chr16	2033462	2033600	30	cell-type specific
chr16	25006884	25007049	30	cell-type specific
chr16	52615483	52615704	30	cell-type specific
chr16	53529360	53529549	30	cell-type specific
chr16	56858342	56858479	30	cell-type specific
chr16	64984202	64984474	30	cell-type specific
chr16	71641727	71641931	30	cell-type specific
chr16	85431213	85431405	30	cell-type specific
chr17	19622199	19622404	30	cell-type specific
chr17	36631076	36631210	30	cell-type specific
chr17	4443610	4443826	30	cell-type specific
chr17	48698289	48698503	30	cell-type specific
chr17	54943971	54944171	30	cell-type specific
chr17	58155972	58156145	30	cell-type specific
chr17	64286337	64286485	30	cell-type specific
chr17	64306804	64306957	30	cell-type specific
chr17	71642922	71643056	30	cell-type specific
chr17	78932773	78932929	30	cell-type specific
chr18	19364626	19364779	30	cell-type specific
chr18	25937921	25938088	30	cell-type specific
chr18	31805013	31805181	30	cell-type specific
chr18	46862179	46862339	30	cell-type specific
chr19	10676463	10676633	30	cell-type specific
chr19	18109103	18109274	30	cell-type specific
chr19	383967	384152	30	cell-type specific
chr19	43532263	43532448	30	cell-type specific
chr19	43692198	43692448	30	cell-type specific
chr19	46417207	46417348	30	cell-type specific
chr19	49993143	49993277	30	cell-type specific
chr19	54312837	54312975	30	cell-type specific
chr19	5997551	5997696	30	cell-type specific
chr19	6551994	6552173	30	cell-type specific
chr19	7451194	7451328	30	cell-type specific
chr2	101435083	101435266	30	cell-type specific
chr2	112973865	112974039	30	cell-type specific
chr2	118675157	118675294	30	cell-type specific
chr2	123058443	123058612	30	cell-type specific
chr2	129071147	129071319	30	cell-type specific
chr2	154626968	154627124	30	cell-type specific
chr2	187919318	187919469	30	cell-type specific
chr2	206799253	206799461	30	cell-type specific
chr2	208761734	208761928	30	cell-type specific
chr2	211920274	211920455	30	cell-type specific
chr2	233928013	233928179	30	cell-type specific
chr2	26778572	26778707	30	cell-type specific
chr2	27514994	27515300	30	cell-type specific
chr2	31302650	31302848	30	cell-type specific
chr2	31900755	31900895	30	cell-type specific
chr2	35339932	35340099	30	cell-type specific
chr2	3676547	3676696	30	cell-type specific
chr2	42301905	42302096	30	cell-type specific
chr2	4810813	4810965	30	cell-type specific
chr2	7273725	7273926	30	cell-type specific
chr2	97011204	97011381	30	cell-type specific
chr20	1404544	1404679	30	cell-type specific
chr20	2378379	2378515	30	cell-type specific
chr20	39440418	39440554	30	cell-type specific
chr20	44115914	44116053	30	cell-type specific
chr20	4431098	4431232	30	cell-type specific
chr20	44882023	44882283	30	cell-type specific
chr20	49659349	49659506	30	cell-type specific
chr20	4979074	4979232	30	cell-type specific
chr20	52811245	52811478	30	cell-type specific
chr21	42415058	42415192	30	cell-type specific
chr21	45687552	45687722	30	cell-type specific
chr22	19931260	19931395	30	cell-type specific
chr22	39687615	39687804	30	cell-type specific
chr22	40339517	40339670	30	cell-type specific
chr3	113464651	113464824	30	cell-type specific
chr3	15511897	15512117	30	cell-type specific
chr3	170831622	170831756	30	cell-type specific
chr3	177201008	177201165	30	cell-type specific
chr3	196715112	196715303	30	cell-type specific
chr3	53264099	53264279	30	cell-type specific
chr4	113269769	113269946	30	cell-type specific
chr4	115963787	115963950	30	cell-type specific
chr4	17563892	17564026	30	cell-type specific
chr4	188301330	188301465	30	cell-type specific
chr4	20315330	20315500	30	cell-type specific
chr4	38834619	38834808	30	cell-type specific
chr5	100110561	100110787	30	cell-type specific
chr5	10724967	10725101	30	cell-type specific
chr5	125931052	125931208	30	cell-type specific
chr5	132090736	132090883	30	cell-type specific
chr5	13218768	13218917	30	cell-type specific
chr5	154019910	154020045	30	cell-type specific
chr5	38498199	38498333	30	cell-type specific
chr5	4295915	4296068	30	cell-type specific
chr5	63978532	63978671	30	cell-type specific
chr5	7016091	7016225	30	cell-type specific
chr5	96143630	96143785	30	cell-type specific
chr6	113735789	113735947	30	cell-type specific
chr6	137692603	137692743	30	cell-type specific
chr6	149866460	149866697	30	cell-type specific
chr6	157254602	157254803	30	cell-type specific
chr6	158183747	158183882	30	cell-type specific
chr6	158927757	158927937	30	cell-type specific
chr6	169215417	169215570	30	cell-type specific
chr6	23082072	23082215	30	cell-type specific
chr6	26045836	26045977	30	cell-type specific
chr6	72596494	72596717	30	cell-type specific
chr6	87416249	87416441	30	cell-type specific
chr7	150020618	150020817	30	cell-type specific
chr7	158148322	158148466	30	cell-type specific
chr7	30948437	30948607	30	cell-type specific
chr7	36124137	36124298	30	cell-type specific
chr7	43251066	43251224	30	cell-type specific
chr7	45007173	45007307	30	cell-type specific
chr7	47761301	47761473	30	cell-type specific
chr7	54614523	54614735	30	cell-type specific
chr7	66767722	66767973	30	cell-type specific
chr7	74124325	74124465	30	cell-type specific
chr7	79763853	79764061	30	cell-type specific
chr7	99045656	99045808	30	cell-type specific
chr8	112112908	112113079	30	cell-type specific
chr8	142639561	142639805	30	cell-type specific
chr8	21966272	21966406	30	cell-type specific
chr8	54647165	54647314	30	cell-type specific
chr8	55856740	55856905	30	cell-type specific
chr8	57805509	57805643	30	cell-type specific
chr8	74790162	74790296	30	cell-type specific
chr9	101018187	101018326	30	cell-type specific
chr9	114784616	114784753	30	cell-type specific
chr9	132647374	132647589	30	cell-type specific
chr9	139431600	139431748	30	cell-type specific
chr9	33742578	33742712	30	cell-type specific
chr9	83718772	83718915	30	cell-type specific
chrX	56791304	56791438	30	cell-type specific
chrX	8692437	8692613	30	cell-type specific
chrX	93779957	93780095	30	cell-type specific
chr1	181906507	181906658	29	cell-type specific
chr1	194312043	194312286	29	cell-type specific
chr1	216367514	216367648	29	cell-type specific
chr1	2169249	2169383	29	cell-type specific
chr1	22266237	22266406	29	cell-type specific
chr1	236332491	236332699	29	cell-type specific
chr1	237733959	237734118	29	cell-type specific
chr1	24580187	24580344	29	cell-type specific
chr1	3320068	3320221	29	cell-type specific
chr1	3816342	3816581	29	cell-type specific
chr1	53935817	53936065	29	cell-type specific
chr1	6500876	6501010	29	cell-type specific
chr1	8225826	8226005	29	cell-type specific
chr1	8299118	8299252	29	cell-type specific
chr10	105614878	105615094	29	cell-type specific
chr10	112632468	112632636	29	cell-type specific
chr10	127702638	127702775	29	cell-type specific
chr10	19457646	19457780	29	cell-type specific
chr10	34594210	34594387	29	cell-type specific
chr10	6019981	6020155	29	cell-type specific
chr10	64441366	64441516	29	cell-type specific
chr10	71812478	71812705	29	cell-type specific
chr10	81890121	81890298	29	cell-type specific
chr10	89578239	89578536	29	cell-type specific
chr10	90750940	90751112	29	cell-type specific
chr10	92418685	92418819	29	cell-type specific
chr10	95836170	95836310	29	cell-type specific
chr10	96437561	96437724	29	cell-type specific
chr11	116607630	116607764	29	cell-type specific
chr11	123431935	123432069	29	cell-type specific
chr11	17495012	17495201	29	cell-type specific
chr11	30607813	30608094	29	cell-type specific
chr11	35164030	35164200	29	cell-type specific
chr11	61345326	61345480	29	cell-type specific
chr11	75207346	75207553	29	cell-type specific
chr11	76774064	76774198	29	cell-type specific
chr12	118328068	118328211	29	cell-type specific
chr12	119673241	119673375	29	cell-type specific
chr12	129156215	129156360	29	cell-type specific
chr12	129328904	129329062	29	cell-type specific
chr12	39769340	39769481	29	cell-type specific
chr12	7167819	7168086	29	cell-type specific
chr12	75300124	75300311	29	cell-type specific
chr12	78511950	78512096	29	cell-type specific
chr12	978016	978151	29	cell-type specific
chr13	82531387	82531589	29	cell-type specific
chr13	93880220	93880422	29	cell-type specific
chr14	100539143	100539277	29	cell-type specific
chr14	20819173	20819327	29	cell-type specific
chr14	23829859	23830002	29	cell-type specific
chr14	23997855	23998113	29	cell-type specific
chr14	50087850	50087996	29	cell-type specific
chr14	59729966	59730100	29	cell-type specific
chr14	75614279	75614426	29	cell-type specific
chr14	93650727	93650899	29	cell-type specific
chr14	98444859	98445011	29	cell-type specific
chr15	85106864	85106999	29	cell-type specific
chr15	88736749	88736883	29	cell-type specific
chr15	90039519	90039676	29	cell-type specific
chr15	96394201	96394340	29	cell-type specific
chr15	98392501	98392673	29	cell-type specific
chr16	26806595	26806803	29	cell-type specific
chr16	28991816	28991951	29	cell-type specific
chr16	50815178	50815316	29	cell-type specific
chr16	57862570	57862751	29	cell-type specific
chr16	71475465	71475627	29	cell-type specific
chr16	72229585	72229719	29	cell-type specific
chr16	731206	731340	29	cell-type specific
chr16	87923493	87923677	29	cell-type specific
chr16	88910955	88911140	29	cell-type specific
chr17	37021227	37021395	29	cell-type specific
chr17	37350706	37350896	29	cell-type specific
chr17	43334071	43334210	29	cell-type specific
chr17	48611748	48611896	29	cell-type specific
chr17	59503446	59503688	29	cell-type specific
chr17	62113927	62114154	29	cell-type specific
chr17	64018001	64018150	29	cell-type specific
chr17	64447704	64447873	29	cell-type specific
chr17	71779268	71779457	29	cell-type specific
chr17	72755802	72755936	29	cell-type specific
chr17	77879701	77879889	29	cell-type specific
chr17	79526126	79526343	29	cell-type specific
chr17	79660950	79661109	29	cell-type specific
chr17	79783836	79783988	29	cell-type specific
chr17	79919164	79919307	29	cell-type specific
chr17	8554467	8554611	29	cell-type specific
chr17	9727511	9727728	29	cell-type specific
chr18	37421579	37421742	29	cell-type specific
chr18	3772728	3772894	29	cell-type specific
chr18	45302465	45302599	29	cell-type specific
chr18	7567173	7567333	29	cell-type specific
chr19	14207502	14207644	29	cell-type specific
chr19	3036859	3037007	29	cell-type specific
chr19	41008712	41008858	29	cell-type specific
chr19	49522932	49523109	29	cell-type specific
chr19	51207494	51207652	29	cell-type specific
chr2	121041260	121041415	29	cell-type specific
chr2	15686672	15686964	29	cell-type specific
chr2	162845077	162845261	29	cell-type specific
chr2	162948287	162948480	29	cell-type specific
chr2	204103809	204104283	29	cell-type specific
chr2	223824266	223824402	29	cell-type specific
chr2	232997911	232998070	29	cell-type specific
chr2	233708672	233708832	29	cell-type specific
chr2	239662993	239663169	29	cell-type specific
chr2	241673342	241673476	29	cell-type specific
chr2	47315608	47315771	29	cell-type specific
chr2	47541002	47541140	29	cell-type specific
chr2	53670102	53670236	29	cell-type specific
chr2	55646932	55647066	29	cell-type specific
chr2	68950039	68950182	29	cell-type specific
chr2	72595111	72595314	29	cell-type specific
chr2	74989975	74990154	29	cell-type specific
chr2	75787182	75787364	29	cell-type specific
chr2	82250954	82251156	29	cell-type specific
chr2	97269915	97270147	29	cell-type specific
chr2	97778761	97778910	29	cell-type specific
chr20	10028180	10028333	29	cell-type specific
chr20	18361951	18362097	29	cell-type specific
chr20	3085611	3085797	29	cell-type specific
chr20	36967349	36967483	29	cell-type specific
chr20	42286794	42286938	29	cell-type specific
chr20	43232078	43232258	29	cell-type specific
chr20	43325042	43325235	29	cell-type specific
chr20	48225298	48225432	29	cell-type specific
chr20	61532282	61532447	29	cell-type specific
chr21	24389022	24389230	29	cell-type specific
chr21	36880849	36880996	29	cell-type specific
chr22	20162516	20162718	29	cell-type specific
chr22	29716668	29716815	29	cell-type specific
chr22	38131257	38131393	29	cell-type specific
chr22	42770807	42770941	29	cell-type specific
chr3	125461852	125462011	29	cell-type specific
chr3	131245678	131245876	29	cell-type specific
chr3	133943422	133943674	29	cell-type specific
chr3	191808597	191808741	29	cell-type specific
chr3	33840326	33840460	29	cell-type specific
chr3	48598521	48598666	29	cell-type specific
chr4	140004719	140004945	29	cell-type specific
chr4	154945362	154945496	29	cell-type specific
chr4	170074178	170074341	29	cell-type specific
chr4	2283453	2283599	29	cell-type specific
chr4	2912255	2912410	29	cell-type specific
chr4	3320459	3320593	29	cell-type specific
chr4	76813801	76813942	29	cell-type specific
chr4	7877930	7878064	29	cell-type specific
chr4	8344545	8344731	29	cell-type specific
chr5	109669202	109669336	29	cell-type specific
chr5	132740553	132740749	29	cell-type specific
chr5	139064556	139064731	29	cell-type specific
chr5	142150790	142151013	29	cell-type specific
chr5	149312400	149312600	29	cell-type specific
chr5	149940012	149940146	29	cell-type specific
chr5	16776814	16777079	29	cell-type specific
chr5	178688377	178688549	29	cell-type specific
chr5	2208159	2208357	29	cell-type specific
chr5	26025028	26025170	29	cell-type specific
chr5	36752111	36752288	29	cell-type specific
chr5	67511209	67511343	29	cell-type specific
chr5	8585503	8585637	29	cell-type specific
chr6	124287190	124287357	29	cell-type specific
chr6	161152119	161152254	29	cell-type specific
chr6	162863832	162863974	29	cell-type specific
chr6	167914273	167914473	29	cell-type specific
chr6	3239783	3239993	29	cell-type specific
chr6	36213550	36213708	29	cell-type specific
chr6	39357277	39357411	29	cell-type specific
chr6	51423947	51424124	29	cell-type specific
chr6	702216	702365	29	cell-type specific
chr6	9852371	9852542	29	cell-type specific
chr7	114579884	114580041	29	cell-type specific
chr7	150086052	150086303	29	cell-type specific
chr7	154432188	154432429	29	cell-type specific
chr7	76922459	76922616	29	cell-type specific
chr7	86849284	86849418	29	cell-type specific
chr7	9640705	9640862	29	cell-type specific
chr8	130760699	130760900	29	cell-type specific
chr8	54199359	54199584	29	cell-type specific
chr8	8932380	8932514	29	cell-type specific
chr9	112218282	112218429	29	cell-type specific
chr9	116916124	116916301	29	cell-type specific
chr9	123087421	123087555	29	cell-type specific
chr9	129679335	129679477	29	cell-type specific
chr9	131176860	131176994	29	cell-type specific
chr9	134150834	134151010	29	cell-type specific
chr9	139240416	139240560	29	cell-type specific
chr9	36205272	36205487	29	cell-type specific
chr9	6845983	6846194	29	cell-type specific
chr9	75459034	75459266	29	cell-type specific
chr9	75814920	75815117	29	cell-type specific
chr9	85846070	85846296	29	cell-type specific
chr9	96355013	96355218	29	cell-type specific
chrX	108718453	108718588	29	cell-type specific
chrX	118862562	118862696	29	cell-type specific
chrX	24711567	24711701	29	cell-type specific
chrX	30954126	30954307	29	cell-type specific
chr1	11040409	11040581	28	cell-type specific
chr1	119859577	119859744	28	cell-type specific
chr1	16284021	16284191	28	cell-type specific
chr1	17274127	17274262	28	cell-type specific
chr1	1830708	1830955	28	cell-type specific
chr1	19338876	19339061	28	cell-type specific
chr1	202091818	202092008	28	cell-type specific
chr1	226825435	226825646	28	cell-type specific
chr1	236009232	236009378	28	cell-type specific
chr1	27873866	27874000	28	cell-type specific
chr1	37551096	37551245	28	cell-type specific
chr1	44760502	44760655	28	cell-type specific
chr1	6009626	6009815	28	cell-type specific
chr1	73311171	73311309	28	cell-type specific
chr10	100183484	100183694	28	cell-type specific
chr10	118386967	118387156	28	cell-type specific
chr10	120909378	120909512	28	cell-type specific
chr10	123872291	123872425	28	cell-type specific
chr10	124925052	124925219	28	cell-type specific
chr10	29776863	29777040	28	cell-type specific
chr10	35226947	35227087	28	cell-type specific
chr10	43471169	43471357	28	cell-type specific
chr10	47089901	47090035	28	cell-type specific
chr10	74927829	74927988	28	cell-type specific
chr10	7571670	7571839	28	cell-type specific
chr10	82016661	82016859	28	cell-type specific
chr10	88123009	88123180	28	cell-type specific
chr10	88705396	88705599	28	cell-type specific
chr10	99178833	99178978	28	cell-type specific
chr11	129940540	129940714	28	cell-type specific
chr11	134595980	134596165	28	cell-type specific
chr11	2422921	2423081	28	cell-type specific
chr11	44961302	44961436	28	cell-type specific
chr11	74394729	74394863	28	cell-type specific
chr11	90168081	90168218	28	cell-type specific
chr12	124229485	124229652	28	cell-type specific
chr12	124994856	124995104	28	cell-type specific
chr12	20777817	20777994	28	cell-type specific
chr12	31855102	31855236	28	cell-type specific
chr12	49454346	49454527	28	cell-type specific
chr12	65468789	65468933	28	cell-type specific
chr12	89814992	89815136	28	cell-type specific
chr13	105187303	105187482	28	cell-type specific
chr13	109380820	109381002	28	cell-type specific
chr13	113866209	113866345	28	cell-type specific
chr13	29393997	29394158	28	cell-type specific
chr13	53313040	53313222	28	cell-type specific
chr13	79450495	79450629	28	cell-type specific
chr14	100029636	100029770	28	cell-type specific
chr14	21429464	21429657	28	cell-type specific
chr14	58868482	58868616	28	cell-type specific
chr14	73386828	73387016	28	cell-type specific
chr14	74998321	74998502	28	cell-type specific
chr14	77499280	77499428	28	cell-type specific
chr14	77875664	77875852	28	cell-type specific
chr15	25591212	25591417	28	cell-type specific
chr15	27229077	27229247	28	cell-type specific
chr15	47319902	47320036	28	cell-type specific
chr15	64208378	64208516	28	cell-type specific
chr15	66373502	66373689	28	cell-type specific
chr15	75109698	75109895	28	cell-type specific
chr15	79833055	79833189	28	cell-type specific
chr15	85478294	85478498	28	cell-type specific
chr15	89683043	89683233	28	cell-type specific
chr16	29193205	29193426	28	cell-type specific
chr16	30123500	30123698	28	cell-type specific
chr16	30913535	30913669	28	cell-type specific
chr16	56311077	56311211	28	cell-type specific
chr16	597089	597223	28	cell-type specific
chr16	66201839	66201973	28	cell-type specific
chr16	69971410	69971562	28	cell-type specific
chr16	78261830	78261964	28	cell-type specific
chr16	88227771	88227918	28	cell-type specific
chr17	33179625	33179773	28	cell-type specific
chr17	59541072	59541222	28	cell-type specific
chr17	75910875	75911043	28	cell-type specific
chr17	79766820	79767041	28	cell-type specific
chr18	14979068	14979257	28	cell-type specific
chr18	20675508	20675700	28	cell-type specific
chr18	50243406	50243540	28	cell-type specific
chr18	67627039	67627207	28	cell-type specific
chr18	8882623	8882810	28	cell-type specific
chr19	18109384	18109606	28	cell-type specific
chr19	18530233	18530376	28	cell-type specific
chr19	41208547	41208758	28	cell-type specific
chr19	52168413	52168547	28	cell-type specific
chr19	57348862	57349006	28	cell-type specific
chr19	6018988	6019122	28	cell-type specific
chr2	112778282	112778416	28	cell-type specific
chr2	118846884	118847055	28	cell-type specific
chr2	132589556	132589784	28	cell-type specific
chr2	13342148	13342310	28	cell-type specific
chr2	149362117	149362285	28	cell-type specific
chr2	16174268	16174452	28	cell-type specific
chr2	168701691	168701887	28	cell-type specific
chr2	169706212	169706351	28	cell-type specific
chr2	172161	172358	28	cell-type specific
chr2	20817749	20817898	28	cell-type specific
chr2	216601533	216601685	28	cell-type specific
chr2	25104685	25104822	28	cell-type specific
chr2	36096855	36097030	28	cell-type specific
chr2	46277739	46277906	28	cell-type specific
chr2	47261304	47261527	28	cell-type specific
chr2	73263404	73263616	28	cell-type specific
chr2	89267483	89267617	28	cell-type specific
chr20	33852672	33852838	28	cell-type specific
chr20	43271554	43271738	28	cell-type specific
chr20	49122813	49123022	28	cell-type specific
chr20	54746242	54746411	28	cell-type specific
chr20	58014405	58014591	28	cell-type specific
chr20	60493672	60493906	28	cell-type specific
chr20	62490413	62490559	28	cell-type specific
chr22	24655567	24655707	28	cell-type specific
chr3	10557984	10558124	28	cell-type specific
chr3	133551446	133551608	28	cell-type specific
chr3	15030592	15030726	28	cell-type specific
chr3	158630152	158630286	28	cell-type specific
chr3	36782863	36783022	28	cell-type specific
chr3	37953658	37953825	28	cell-type specific
chr3	61280556	61280705	28	cell-type specific
chr3	67952213	67952375	28	cell-type specific
chr3	71429324	71429488	28	cell-type specific
chr4	104128927	104129094	28	cell-type specific
chr4	107444115	107444259	28	cell-type specific
chr4	119345332	119345466	28	cell-type specific
chr4	128972461	128972665	28	cell-type specific
chr4	139499089	139499252	28	cell-type specific
chr4	158726257	158726397	28	cell-type specific
chr4	179317112	179317307	28	cell-type specific
chr4	181874852	181874997	28	cell-type specific
chr4	185065006	185065140	28	cell-type specific
chr4	62607629	62607830	28	cell-type specific
chr4	93012589	93012749	28	cell-type specific
chr5	163405994	163406184	28	cell-type specific
chr5	26009964	26010150	28	cell-type specific
chr5	29005483	29005617	28	cell-type specific
chr5	42894341	42894523	28	cell-type specific
chr5	44604133	44604267	28	cell-type specific
chr5	73197403	73197537	28	cell-type specific
chr5	75312204	75312338	28	cell-type specific
chr5	77663263	77663406	28	cell-type specific
chr6	112120913	112121047	28	cell-type specific
chr6	113410430	113410570	28	cell-type specific
chr6	136656106	136656303	28	cell-type specific
chr6	150219597	150219731	28	cell-type specific
chr6	28323582	28323794	28	cell-type specific
chr6	42054205	42054354	28	cell-type specific
chr6	617602	617747	28	cell-type specific
chr6	63831164	63831310	28	cell-type specific
chr6	73270815	73270962	28	cell-type specific
chr7	100198138	100198316	28	cell-type specific
chr7	127992341	127992488	28	cell-type specific
chr7	132959874	132960012	28	cell-type specific
chr7	134236962	134237100	28	cell-type specific
chr7	30508972	30509166	28	cell-type specific
chr7	34321008	34321144	28	cell-type specific
chr7	44059862	44060035	28	cell-type specific
chr7	5517354	5517521	28	cell-type specific
chr7	64407264	64407443	28	cell-type specific
chr8	145081929	145082067	28	cell-type specific
chr8	146295000	146295141	28	cell-type specific
chr8	29493542	29493771	28	cell-type specific
chr8	69985193	69985327	28	cell-type specific
chr8	99713114	99713270	28	cell-type specific
chr9	116761252	116761386	28	cell-type specific
chr9	137731372	137731512	28	cell-type specific
chr9	14322583	14322717	28	cell-type specific
chr9	25003785	25003953	28	cell-type specific
chr9	36866931	36867099	28	cell-type specific
chr9	75682089	75682223	28	cell-type specific
chr9	90341385	90341676	28	cell-type specific
chrX	134572426	134572605	28	cell-type specific
chrX	150891073	150891260	28	cell-type specific
chrX	43514225	43514360	28	cell-type specific
chr1	118358673	118358898	27	cell-type specific
chr1	13870556	13870696	27	cell-type specific
chr1	1509498	1509633	27	cell-type specific
chr1	182374007	182374141	27	cell-type specific
chr1	18887304	18887440	27	cell-type specific
chr1	193364678	193364840	27	cell-type specific
chr1	207098849	207099118	27	cell-type specific
chr1	22534833	22535049	27	cell-type specific
chr1	230303472	230303606	27	cell-type specific
chr1	35350589	35350772	27	cell-type specific
chr1	47784241	47784382	27	cell-type specific
chr1	51435379	51435527	27	cell-type specific
chr1	58531333	58531511	27	cell-type specific
chr1	62013051	62013248	27	cell-type specific
chr1	7535280	7535429	27	cell-type specific
chr1	8658228	8658362	27	cell-type specific
chr1	96259522	96259703	27	cell-type specific
chr10	126480137	126480288	27	cell-type specific
chr10	13124635	13124786	27	cell-type specific
chr10	134707377	134707531	27	cell-type specific
chr10	14589982	14590116	27	cell-type specific
chr10	31909353	31909489	27	cell-type specific
chr10	47025002	47025138	27	cell-type specific
chr10	73128542	73128696	27	cell-type specific
chr10	77863139	77863337	27	cell-type specific
chr10	81198259	81198444	27	cell-type specific
chr10	94179945	94180161	27	cell-type specific
chr11	101723127	101723301	27	cell-type specific
chr11	119565238	119565390	27	cell-type specific
chr11	124984545	124984697	27	cell-type specific
chr11	268888	269023	27	cell-type specific
chr11	56289485	56289672	27	cell-type specific
chr11	57827391	57827525	27	cell-type specific
chr11	66080906	66081079	27	cell-type specific
chr12	107349758	107349951	27	cell-type specific
chr12	113226134	113226268	27	cell-type specific
chr12	115895274	115895434	27	cell-type specific
chr12	116295443	116295596	27	cell-type specific
chr12	129671604	129671743	27	cell-type specific
chr12	28390475	28390672	27	cell-type specific
chr12	83655912	83656046	27	cell-type specific
chr12	86036746	86036880	27	cell-type specific
chr13	102106214	102106439	27	cell-type specific
chr13	32833359	32833506	27	cell-type specific
chr13	37712478	37712620	27	cell-type specific
chr13	46645722	46645950	27	cell-type specific
chr13	88721322	88721474	27	cell-type specific
chr14	102675654	102675793	27	cell-type specific
chr14	105287137	105287298	27	cell-type specific
chr14	92977433	92977593	27	cell-type specific
chr15	43648657	43648809	27	cell-type specific
chr15	65728186	65728320	27	cell-type specific
chr15	69328131	69328327	27	cell-type specific
chr15	74775112	74775269	27	cell-type specific
chr15	84915177	84915558	27	cell-type specific
chr16	2274141	2274318	27	cell-type specific
chr16	2328370	2328527	27	cell-type specific
chr16	32909209	32909411	27	cell-type specific
chr16	34423040	34423227	27	cell-type specific
chr16	48075876	48076022	27	cell-type specific
chr16	67687071	67687239	27	cell-type specific
chr16	68783540	68783731	27	cell-type specific
chr16	81232412	81232597	27	cell-type specific
chr16	81631806	81631940	27	cell-type specific
chr17	58240519	58240692	27	cell-type specific
chr17	64197986	64198137	27	cell-type specific
chr17	79163556	79163731	27	cell-type specific
chr17	8791886	8792074	27	cell-type specific
chr18	28786846	28786999	27	cell-type specific
chr18	31324082	31324237	27	cell-type specific
chr18	34915512	34915648	27	cell-type specific
chr18	41001075	41001209	27	cell-type specific
chr18	56936423	56936602	27	cell-type specific
chr18	65820140	65820274	27	cell-type specific
chr19	50254458	50254607	27	cell-type specific
chr19	51021817	51022004	27	cell-type specific
chr19	6426401	6426545	27	cell-type specific
chr19	9995857	9995991	27	cell-type specific
chr2	101821285	101821443	27	cell-type specific
chr2	121214599	121214751	27	cell-type specific
chr2	121665456	121665658	27	cell-type specific
chr2	190627338	190627503	27	cell-type specific
chr2	19577589	19577723	27	cell-type specific
chr2	202316591	202316725	27	cell-type specific
chr2	212212232	212212366	27	cell-type specific
chr2	216161127	216161293	27	cell-type specific
chr2	233415605	233415813	27	cell-type specific
chr2	23728221	23728371	27	cell-type specific
chr2	238523145	238523333	27	cell-type specific
chr2	36560834	36560968	27	cell-type specific
chr2	50902119	50902306	27	cell-type specific
chr2	55001087	55001241	27	cell-type specific
chr2	72161137	72161271	27	cell-type specific
chr2	74902354	74902488	27	cell-type specific
chr20	15848708	15848842	27	cell-type specific
chr20	16885488	16885706	27	cell-type specific
chr20	23401767	23401901	27	cell-type specific
chr20	45318003	45318152	27	cell-type specific
chr20	50618779	50618918	27	cell-type specific
chr20	51554462	51554629	27	cell-type specific
chr21	24825166	24825348	27	cell-type specific
chr21	42213993	42214144	27	cell-type specific
chr21	47188605	47188739	27	cell-type specific
chr22	36966128	36966295	27	cell-type specific
chr3	109128809	109128943	27	cell-type specific
chr3	112994799	112995139	27	cell-type specific
chr3	125931964	125932105	27	cell-type specific
chr3	128309864	128310058	27	cell-type specific
chr3	13324753	13324900	27	cell-type specific
chr3	13968890	13969060	27	cell-type specific
chr3	14473211	14473345	27	cell-type specific
chr3	169796430	169796564	27	cell-type specific
chr3	27955804	27955951	27	cell-type specific
chr3	36173818	36173982	27	cell-type specific
chr3	48450244	48450399	27	cell-type specific
chr3	51744683	51744864	27	cell-type specific
chr3	58235715	58235849	27	cell-type specific
chr3	7117702	7117869	27	cell-type specific
chr3	78115560	78115725	27	cell-type specific
chr4	137990747	137990886	27	cell-type specific
chr4	153357682	153357816	27	cell-type specific
chr4	6785120	6785261	27	cell-type specific
chr4	83197093	83197259	27	cell-type specific
chr4	83500294	83500446	27	cell-type specific
chr5	135782338	135782475	27	cell-type specific
chr5	140767109	140767249	27	cell-type specific
chr5	146777403	146777537	27	cell-type specific
chr5	149969407	149969615	27	cell-type specific
chr5	167849574	167849728	27	cell-type specific
chr5	172093414	172093551	27	cell-type specific
chr5	179544195	179544373	27	cell-type specific
chr5	53357551	53357702	27	cell-type specific
chr5	5340523	5340669	27	cell-type specific
chr5	55278825	55278959	27	cell-type specific
chr5	73423855	73424017	27	cell-type specific
chr5	92014376	92014557	27	cell-type specific
chr5	92221759	92221925	27	cell-type specific
chr6	105307620	105307754	27	cell-type specific
chr6	105850988	105851122	27	cell-type specific
chr6	126871603	126871825	27	cell-type specific
chr6	126949308	126949505	27	cell-type specific
chr6	142509603	142509762	27	cell-type specific
chr6	142795656	142795845	27	cell-type specific
chr6	167528644	167528783	27	cell-type specific
chr6	3330581	3330715	27	cell-type specific
chr6	63955929	63956127	27	cell-type specific
chr6	80141276	80141479	27	cell-type specific
chr6	91691943	91692077	27	cell-type specific
chr7	146469809	146469945	27	cell-type specific
chr7	155198225	155198362	27	cell-type specific
chr7	1597989	1598134	27	cell-type specific
chr7	7370811	7370945	27	cell-type specific
chr7	75590702	75590900	27	cell-type specific
chr8	108612263	108612402	27	cell-type specific
chr8	17434978	17435182	27	cell-type specific
chr8	18871152	18871346	27	cell-type specific
chr8	76255160	76255295	27	cell-type specific
chr8	81478220	81478402	27	cell-type specific
chr8	83490940	83491085	27	cell-type specific
chr9	101004104	101004280	27	cell-type specific
chr9	115128935	115129126	27	cell-type specific
chr9	123062203	123062356	27	cell-type specific
chr9	123884060	123884219	27	cell-type specific
chr9	124049780	124049959	27	cell-type specific
chr9	130341963	130342097	27	cell-type specific
chr9	35522336	35522484	27	cell-type specific
chr9	4679798	4679932	27	cell-type specific
chr9	72360748	72360906	27	cell-type specific
chr9	90113252	90113477	27	cell-type specific
chr9	96728206	96728340	27	cell-type specific
chrX	128126698	128126863	27	cell-type specific
chrX	48464638	48464797	27	cell-type specific
chr1	111557972	111558107	26	cell-type specific
chr1	12399532	12399687	26	cell-type specific
chr1	14893660	14893828	26	cell-type specific
chr1	151108075	151108209	26	cell-type specific
chr1	154077008	154077160	26	cell-type specific
chr1	171535775	171535914	26	cell-type specific
chr1	194086816	194086950	26	cell-type specific
chr1	228379576	228379756	26	cell-type specific
chr1	48693933	48694077	26	cell-type specific
chr1	53642517	53642703	26	cell-type specific
chr1	6438258	6438472	26	cell-type specific
chr1	96701624	96701762	26	cell-type specific
chr10	126107677	126107820	26	cell-type specific
chr10	29754419	29754597	26	cell-type specific
chr10	66408744	66408922	26	cell-type specific
chr10	87372773	87372965	26	cell-type specific
chr10	98939712	98939866	26	cell-type specific
chr10	99092797	99092931	26	cell-type specific
chr11	15096222	15096401	26	cell-type specific
chr11	27528042	27528242	26	cell-type specific
chr11	39746069	39746213	26	cell-type specific
chr11	45826405	45826539	26	cell-type specific
chr11	65541543	65541732	26	cell-type specific
chr11	65756868	65757021	26	cell-type specific
chr11	70357560	70357694	26	cell-type specific
chr11	73241305	73241478	26	cell-type specific
chr11	96205356	96205502	26	cell-type specific
chr11	9628689	9628823	26	cell-type specific
chr12	121821448	121821582	26	cell-type specific
chr12	26782982	26783131	26	cell-type specific
chr12	49677903	49678067	26	cell-type specific
chr12	53109271	53109483	26	cell-type specific
chr12	69293018	69293181	26	cell-type specific
chr12	8384388	8384618	26	cell-type specific
chr12	93793051	93793185	26	cell-type specific
chr13	100588132	100588267	26	cell-type specific
chr13	109849359	109849493	26	cell-type specific
chr13	25154548	25154704	26	cell-type specific
chr13	62040535	62040683	26	cell-type specific
chr13	65777149	65777283	26	cell-type specific
chr13	93900853	93901076	26	cell-type specific
chr13	99250409	99250557	26	cell-type specific
chr14	25422597	25422731	26	cell-type specific
chr14	32482403	32482545	26	cell-type specific
chr14	47131043	47131208	26	cell-type specific
chr14	86333897	86334031	26	cell-type specific
chr15	26340979	26341141	26	cell-type specific
chr15	43030137	43030335	26	cell-type specific
chr15	52199869	52200003	26	cell-type specific
chr15	55700138	55700320	26	cell-type specific
chr15	83290841	83290987	26	cell-type specific
chr16	12562484	12562666	26	cell-type specific
chr16	27791276	27791480	26	cell-type specific
chr16	27932041	27932241	26	cell-type specific
chr16	29268739	29268875	26	cell-type specific
chr16	73065180	73065364	26	cell-type specific
chr16	85287223	85287402	26	cell-type specific
chr16	88017010	88017163	26	cell-type specific
chr17	22202665	22202830	26	cell-type specific
chr17	45144666	45145006	26	cell-type specific
chr17	468844	469038	26	cell-type specific
chr17	61699065	61699223	26	cell-type specific
chr17	61851944	61852111	26	cell-type specific
chr17	67054468	67054633	26	cell-type specific
chr17	74084176	74084368	26	cell-type specific
chr18	62873909	62874076	26	cell-type specific
chr19	10880899	10881033	26	cell-type specific
chr19	13936340	13936474	26	cell-type specific
chr19	13953122	13953393	26	cell-type specific
chr19	18891599	18891740	26	cell-type specific
chr19	31459271	31459405	26	cell-type specific
chr19	49140071	49140260	26	cell-type specific
chr19	51385557	51385716	26	cell-type specific
chr19	59117704	59118063	26	cell-type specific
chr19	7706266	7706457	26	cell-type specific
chr2	100645983	100646160	26	cell-type specific
chr2	108189447	108189628	26	cell-type specific
chr2	125567834	125567980	26	cell-type specific
chr2	171573408	171573562	26	cell-type specific
chr2	172813697	172813854	26	cell-type specific
chr2	174868417	174868606	26	cell-type specific
chr2	20051037	20051184	26	cell-type specific
chr2	216153913	216154047	26	cell-type specific
chr2	219818284	219818507	26	cell-type specific
chr2	236547560	236547694	26	cell-type specific
chr2	237076159	237076303	26	cell-type specific
chr2	242489202	242489362	26	cell-type specific
chr2	274598	274792	26	cell-type specific
chr2	28196557	28196722	26	cell-type specific
chr2	42564718	42564852	26	cell-type specific
chr2	43040162	43040322	26	cell-type specific
chr2	46525853	46526013	26	cell-type specific
chr2	56336059	56336234	26	cell-type specific
chr2	75652460	75652666	26	cell-type specific
chr2	9613680	9613837	26	cell-type specific
chr2	98267170	98267328	26	cell-type specific
chr20	17859595	17859734	26	cell-type specific
chr20	2846296	2846459	26	cell-type specific
chr20	3154434	3154568	26	cell-type specific
chr20	35871808	35871994	26	cell-type specific
chr20	37230296	37230512	26	cell-type specific
chr20	39986629	39986815	26	cell-type specific
chr20	45925805	45925939	26	cell-type specific
chr20	61414001	61414197	26	cell-type specific
chr20	61506902	61507134	26	cell-type specific
chr21	24503632	24503769	26	cell-type specific
chr21	45148829	45149000	26	cell-type specific
chr22	25507330	25507597	26	cell-type specific
chr22	31595243	31595414	26	cell-type specific
chr22	38831164	38831298	26	cell-type specific
chr3	126658325	126658477	26	cell-type specific
chr3	132993398	132993561	26	cell-type specific
chr3	137820515	137820683	26	cell-type specific
chr3	171358555	171358689	26	cell-type specific
chr3	191486359	191486499	26	cell-type specific
chr3	194392520	194392661	26	cell-type specific
chr3	196019539	196019676	26	cell-type specific
chr3	37645341	37645512	26	cell-type specific
chr3	950655	950789	26	cell-type specific
chr3	9904378	9904555	26	cell-type specific
chr4	1086135	1086269	26	cell-type specific
chr4	128544096	128544234	26	cell-type specific
chr5	112783401	112783584	26	cell-type specific
chr5	131805414	131805548	26	cell-type specific
chr5	133848023	133848177	26	cell-type specific
chr5	150437988	150438217	26	cell-type specific
chr5	16345674	16345808	26	cell-type specific
chr5	17951543	17951708	26	cell-type specific
chr5	4563631	4563765	26	cell-type specific
chr6	1016142	1016305	26	cell-type specific
chr6	101835002	101835138	26	cell-type specific
chr6	116461157	116461390	26	cell-type specific
chr6	118032607	118032744	26	cell-type specific
chr6	135062362	135062518	26	cell-type specific
chr6	169114181	169114328	26	cell-type specific
chr6	170569940	170570074	26	cell-type specific
chr6	42064023	42064337	26	cell-type specific
chr6	5115507	5115659	26	cell-type specific
chr6	56234884	56235127	26	cell-type specific
chr6	91877671	91877836	26	cell-type specific
chr7	1163402	1163595	26	cell-type specific
chr7	157092516	157092717	26	cell-type specific
chr7	21536791	21536982	26	cell-type specific
chr7	24921342	24921536	26	cell-type specific
chr7	51128370	51128513	26	cell-type specific
chr8	144578326	144578476	26	cell-type specific
chr8	145909866	145910021	26	cell-type specific
chr8	1693926	1694070	26	cell-type specific
chr8	58651997	58652146	26	cell-type specific
chr9	132483571	132483709	26	cell-type specific
chr9	137634818	137634952	26	cell-type specific
chr9	139267210	139267346	26	cell-type specific
chr9	140862977	140863135	26	cell-type specific
chr9	35415833	35416033	26	cell-type specific
chrX	120388328	120388462	26	cell-type specific
chrX	17823400	17823572	26	cell-type specific
chrX	40883725	40883859	26	cell-type specific
chr1	100113800	100113963	25	cell-type specific
chr1	10848872	10849075	25	cell-type specific
chr1	11124056	11124190	25	cell-type specific
chr1	116185345	116185479	25	cell-type specific
chr1	11654325	11654486	25	cell-type specific
chr1	15309908	15310085	25	cell-type specific
chr1	17834506	17834655	25	cell-type specific
chr1	17901148	17901319	25	cell-type specific
chr1	18812817	18813020	25	cell-type specific
chr1	195909098	195909238	25	cell-type specific
chr1	207738996	207739164	25	cell-type specific
chr1	228447810	228447945	25	cell-type specific
chr1	228604025	228604159	25	cell-type specific
chr1	26201685	26201855	25	cell-type specific
chr1	26331051	26331185	25	cell-type specific
chr1	36234981	36235115	25	cell-type specific
chr1	36771972	36772133	25	cell-type specific
chr1	6846163	6846320	25	cell-type specific
chr1	7637446	7637584	25	cell-type specific
chr1	81720349	81720483	25	cell-type specific
chr1	9188743	9188939	25	cell-type specific
chr1	9242447	9242616	25	cell-type specific
chr1	93899347	93899545	25	cell-type specific
chr10	102899488	102899622	25	cell-type specific
chr10	104135147	104135281	25	cell-type specific
chr10	115847092	115847227	25	cell-type specific
chr10	118596508	118596649	25	cell-type specific
chr10	128767649	128767783	25	cell-type specific
chr10	33579832	33579972	25	cell-type specific
chr10	43186121	43186284	25	cell-type specific
chr10	5057279	5057413	25	cell-type specific
chr10	66139780	66139939	25	cell-type specific
chr10	99160777	99160976	25	cell-type specific
chr11	101932104	101932241	25	cell-type specific
chr11	41682273	41682407	25	cell-type specific
chr11	63374094	63374235	25	cell-type specific
chr11	755478	755619	25	cell-type specific
chr12	115106462	115106639	25	cell-type specific
chr12	125940235	125940369	25	cell-type specific
chr12	3606215	3606349	25	cell-type specific
chr12	53298878	53299103	25	cell-type specific
chr12	53370145	53370285	25	cell-type specific
chr12	64746101	64746336	25	cell-type specific
chr12	97092469	97092603	25	cell-type specific
chr13	19663529	19663684	25	cell-type specific
chr13	46721136	46721314	25	cell-type specific
chr14	103345217	103345361	25	cell-type specific
chr14	65427524	65427679	25	cell-type specific
chr14	73750888	73751022	25	cell-type specific
chr15	20192699	20192966	25	cell-type specific
chr15	24068725	24068941	25	cell-type specific
chr15	27772719	27772922	25	cell-type specific
chr15	40268996	40269221	25	cell-type specific
chr15	43093322	43093530	25	cell-type specific
chr16	10660601	10660751	25	cell-type specific
chr16	13520205	13520403	25	cell-type specific
chr16	17352790	17352947	25	cell-type specific
chr16	2563090	2563241	25	cell-type specific
chr16	30733854	30734010	25	cell-type specific
chr16	34825348	34825521	25	cell-type specific
chr16	81666869	81667045	25	cell-type specific
chr16	85474767	85474942	25	cell-type specific
chr16	87604763	87604932	25	cell-type specific
chr17	49927696	49927882	25	cell-type specific
chr17	71228365	71228499	25	cell-type specific
chr17	72404529	72404672	25	cell-type specific
chr17	77297709	77297843	25	cell-type specific
chr17	80605503	80605673	25	cell-type specific
chr18	18822138	18822272	25	cell-type specific
chr18	37993276	37993410	25	cell-type specific
chr18	46423516	46423772	25	cell-type specific
chr18	5890641	5890831	25	cell-type specific
chr19	11006600	11006734	25	cell-type specific
chr19	15590442	15590702	25	cell-type specific
chr19	19626499	19626669	25	cell-type specific
chr19	2724230	2724467	25	cell-type specific
chr19	3599769	3599922	25	cell-type specific
chr19	37853718	37853852	25	cell-type specific
chr19	42815872	42816062	25	cell-type specific
chr19	58518792	58518926	25	cell-type specific
chr2	111893501	111893647	25	cell-type specific
chr2	129064041	129064185	25	cell-type specific
chr2	131914468	131914685	25	cell-type specific
chr2	14277926	14278060	25	cell-type specific
chr2	169150475	169150609	25	cell-type specific
chr2	171380112	171380301	25	cell-type specific
chr2	173091187	173091339	25	cell-type specific
chr2	173292906	173293209	25	cell-type specific
chr2	2295775	2295913	25	cell-type specific
chr2	233751973	233752155	25	cell-type specific
chr2	233924406	233924549	25	cell-type specific
chr2	234292786	234292932	25	cell-type specific
chr2	238701028	238701225	25	cell-type specific
chr2	242447333	242447810	25	cell-type specific
chr2	26220833	26220986	25	cell-type specific
chr2	26785226	26785419	25	cell-type specific
chr2	47008053	47008219	25	cell-type specific
chr2	70528713	70528874	25	cell-type specific
chr2	74799418	74799578	25	cell-type specific
chr20	30376486	30376664	25	cell-type specific
chr20	34805298	34805478	25	cell-type specific
chr20	35971254	35971401	25	cell-type specific
chr20	50178955	50179089	25	cell-type specific
chr20	51156500	51156645	25	cell-type specific
chr20	61320354	61320536	25	cell-type specific
chr20	62204351	62204595	25	cell-type specific
chr21	33934795	33934941	25	cell-type specific
chr22	18894638	18894792	25	cell-type specific
chr3	127007875	127008020	25	cell-type specific
chr3	127398575	127398716	25	cell-type specific
chr3	150102767	150102936	25	cell-type specific
chr3	172021813	172021947	25	cell-type specific
chr3	184787540	184787732	25	cell-type specific
chr3	188767370	188767523	25	cell-type specific
chr3	31251780	31251914	25	cell-type specific
chr3	33925803	33925960	25	cell-type specific
chr3	36965051	36965185	25	cell-type specific
chr3	40279784	40279918	25	cell-type specific
chr3	41737407	41737557	25	cell-type specific
chr3	42774508	42774653	25	cell-type specific
chr3	48955848	48955993	25	cell-type specific
chr3	54467930	54468134	25	cell-type specific
chr3	66909192	66909430	25	cell-type specific
chr3	9988900	9989075	25	cell-type specific
chr4	108681783	108681932	25	cell-type specific
chr4	174513038	174513172	25	cell-type specific
chr4	2438152	2438291	25	cell-type specific
chr4	36160948	36161093	25	cell-type specific
chr4	5806434	5806614	25	cell-type specific
chr4	62456759	62456900	25	cell-type specific
chr4	6894231	6894379	25	cell-type specific
chr4	72406702	72406844	25	cell-type specific
chr4	8963201	8963351	25	cell-type specific
chr4	99708132	99708266	25	cell-type specific
chr5	149636089	149636270	25	cell-type specific
chr5	153921383	153921517	25	cell-type specific
chr5	172073986	172074126	25	cell-type specific
chr5	179265180	179265314	25	cell-type specific
chr5	29079985	29080140	25	cell-type specific
chr5	29367640	29367795	25	cell-type specific
chr5	43556881	43557015	25	cell-type specific
chr5	4512235	4512576	25	cell-type specific
chr5	52631026	52631181	25	cell-type specific
chr6	108496739	108496950	25	cell-type specific
chr6	27440555	27440759	25	cell-type specific
chr6	70999133	70999267	25	cell-type specific
chr6	88654515	88654667	25	cell-type specific
chr6	98426965	98427203	25	cell-type specific
chr7	109844688	109844929	25	cell-type specific
chr7	127049837	127050010	25	cell-type specific
chr7	158766281	158766415	25	cell-type specific
chr7	35764903	35765081	25	cell-type specific
chr7	36977440	36977574	25	cell-type specific
chr7	3735360	3735494	25	cell-type specific
chr7	42137368	42137509	25	cell-type specific
chr7	84544007	84544185	25	cell-type specific
chr7	94536796	94536970	25	cell-type specific
chr8	102171155	102171300	25	cell-type specific
chr8	11365822	11365956	25	cell-type specific
chr8	120657394	120657538	25	cell-type specific
chr8	129695883	129696017	25	cell-type specific
chr8	130960695	130960888	25	cell-type specific
chr8	134418928	134419080	25	cell-type specific
chr8	142264722	142264885	25	cell-type specific
chr8	143210295	143210442	25	cell-type specific
chr8	20986849	20986983	25	cell-type specific
chr8	23273234	23273380	25	cell-type specific
chr8	31896290	31896424	25	cell-type specific
chr8	43265034	43265168	25	cell-type specific
chr8	72618851	72618991	25	cell-type specific
chr8	89566845	89566984	25	cell-type specific
chr9	104219378	104219594	25	cell-type specific
chr9	115873852	115874015	25	cell-type specific
chr9	123785425	123785643	25	cell-type specific
chr9	33523408	33523597	25	cell-type specific
chr9	95571117	95571251	25	cell-type specific
chrX	57355666	57355879	25	cell-type specific
chr1	110976589	110976728	24	cell-type specific
chr1	113217745	113217883	24	cell-type specific
chr1	1311802	1311987	24	cell-type specific
chr1	14722229	14722387	24	cell-type specific
chr1	16368692	16368856	24	cell-type specific
chr1	175195046	175195180	24	cell-type specific
chr1	18368275	18368417	24	cell-type specific
chr1	194905106	194905295	24	cell-type specific
chr1	19559050	19559246	24	cell-type specific
chr1	19731759	19731928	24	cell-type specific
chr1	200885392	200885582	24	cell-type specific
chr1	246972868	246973015	24	cell-type specific
chr1	3388435	3388653	24	cell-type specific
chr1	38869447	38869589	24	cell-type specific
chr1	73671417	73671560	24	cell-type specific
chr1	78153361	78153553	24	cell-type specific
chr10	116247041	116247197	24	cell-type specific
chr10	133672537	133672739	24	cell-type specific
chr10	30985470	30985613	24	cell-type specific
chr10	49973259	49973393	24	cell-type specific
chr10	75632230	75632364	24	cell-type specific
chr11	106177766	106177917	24	cell-type specific
chr11	12257239	12257398	24	cell-type specific
chr11	123611981	123612118	24	cell-type specific
chr11	125985890	125986024	24	cell-type specific
chr11	57435674	57435808	24	cell-type specific
chr11	72498355	72498589	24	cell-type specific
chr11	73618315	73618475	24	cell-type specific
chr11	870165	870299	24	cell-type specific
chr11	898614	898754	24	cell-type specific
chr12	115836225	115836485	24	cell-type specific
chr12	121066789	121067014	24	cell-type specific
chr12	132536399	132536570	24	cell-type specific
chr12	2791809	2791950	24	cell-type specific
chr12	30287288	30287442	24	cell-type specific
chr12	56740600	56740734	24	cell-type specific
chr12	97528405	97528539	24	cell-type specific
chr13	113365808	113365994	24	cell-type specific
chr13	114105792	114105938	24	cell-type specific
chr13	114809054	114809193	24	cell-type specific
chr13	49550416	49550627	24	cell-type specific
chr13	92434377	92434522	24	cell-type specific
chr13	96398133	96398280	24	cell-type specific
chr13	98797434	98797568	24	cell-type specific
chr14	23521580	23521734	24	cell-type specific
chr14	39278423	39278598	24	cell-type specific
chr14	54130509	54130665	24	cell-type specific
chr14	88400622	88400756	24	cell-type specific
chr15	100284461	100284714	24	cell-type specific
chr15	63220496	63220646	24	cell-type specific
chr15	73025034	73025174	24	cell-type specific
chr16	50406159	50406303	24	cell-type specific
chr16	52895591	52895786	24	cell-type specific
chr16	83452284	83452418	24	cell-type specific
chr17	35014729	35014863	24	cell-type specific
chr17	36612787	36612997	24	cell-type specific
chr17	42486780	42486945	24	cell-type specific
chr17	48653286	48653486	24	cell-type specific
chr17	52027663	52027845	24	cell-type specific
chr17	55994597	55994745	24	cell-type specific
chr17	65624672	65624844	24	cell-type specific
chr17	76848845	76849087	24	cell-type specific
chr18	10682445	10682579	24	cell-type specific
chr18	13139841	13140044	24	cell-type specific
chr18	19284422	19284556	24	cell-type specific
chr18	29190962	29191135	24	cell-type specific
chr18	61771316	61771468	24	cell-type specific
chr19	17717432	17717598	24	cell-type specific
chr19	33795728	33795875	24	cell-type specific
chr19	39408771	39408982	24	cell-type specific
chr19	46935249	46935435	24	cell-type specific
chr19	47333244	47333392	24	cell-type specific
chr2	108686120	108686284	24	cell-type specific
chr2	10938991	10939160	24	cell-type specific
chr2	116667912	116668119	24	cell-type specific
chr2	135133561	135133746	24	cell-type specific
chr2	147434992	147435126	24	cell-type specific
chr2	158901972	158902119	24	cell-type specific
chr2	180460139	180460290	24	cell-type specific
chr2	202140830	202140991	24	cell-type specific
chr2	210660764	210660900	24	cell-type specific
chr2	224854035	224854169	24	cell-type specific
chr2	230839095	230839229	24	cell-type specific
chr2	231807187	231807328	24	cell-type specific
chr2	235654026	235654160	24	cell-type specific
chr2	236212692	236212833	24	cell-type specific
chr2	28642333	28642487	24	cell-type specific
chr2	38766160	38766338	24	cell-type specific
chr2	63528151	63528303	24	cell-type specific
chr2	77662129	77662286	24	cell-type specific
chr2	78182165	78182355	24	cell-type specific
chr2	86252482	86252616	24	cell-type specific
chr20	1207551	1207712	24	cell-type specific
chr20	34274883	34275027	24	cell-type specific
chr20	47003211	47003365	24	cell-type specific
chr20	57467220	57467359	24	cell-type specific
chr20	5787198	5787357	24	cell-type specific
chr20	60970703	60970924	24	cell-type specific
chr21	42783797	42783931	24	cell-type specific
chr21	43378321	43378486	24	cell-type specific
chr22	19711746	19711880	24	cell-type specific
chr3	13325160	13325309	24	cell-type specific
chr3	139307384	139307549	24	cell-type specific
chr3	150558639	150558784	24	cell-type specific
chr3	168607553	168607709	24	cell-type specific
chr3	193987682	193987872	24	cell-type specific
chr3	32726708	32727077	24	cell-type specific
chr3	46977127	46977328	24	cell-type specific
chr3	51753814	51753948	24	cell-type specific
chr4	186953558	186953692	24	cell-type specific
chr4	1914874	1915042	24	cell-type specific
chr4	253142	253334	24	cell-type specific
chr4	70022710	70022995	24	cell-type specific
chr5	138374701	138374846	24	cell-type specific
chr5	21663329	21663550	24	cell-type specific
chr5	35599188	35599414	24	cell-type specific
chr5	37249187	37249321	24	cell-type specific
chr5	38258931	38259071	24	cell-type specific
chr5	70743142	70743310	24	cell-type specific
chr6	120727245	120727402	24	cell-type specific
chr6	128840296	128840460	24	cell-type specific
chr6	138018592	138018764	24	cell-type specific
chr6	142393169	142393479	24	cell-type specific
chr6	14281100	14281262	24	cell-type specific
chr6	157745110	157745244	24	cell-type specific
chr6	165311135	165311269	24	cell-type specific
chr6	167459470	167459618	24	cell-type specific
chr6	18121906	18122051	24	cell-type specific
chr6	24547568	24547702	24	cell-type specific
chr6	2938954	2939135	24	cell-type specific
chr6	45689483	45689661	24	cell-type specific
chr6	53358216	53358490	24	cell-type specific
chr6	85259775	85259963	24	cell-type specific
chr7	124224	124394	24	cell-type specific
chr7	129222721	129222855	24	cell-type specific
chr7	138666182	138666345	24	cell-type specific
chr7	150850312	150850446	24	cell-type specific
chr7	78990648	78990836	24	cell-type specific
chr7	90558066	90558230	24	cell-type specific
chr7	95025428	95025599	24	cell-type specific
chr8	15935049	15935192	24	cell-type specific
chr9	104078262	104078420	24	cell-type specific
chr9	127557248	127557509	24	cell-type specific
chr9	135058054	135058188	24	cell-type specific
chr9	35816857	35816991	24	cell-type specific
chr9	90449336	90449471	24	cell-type specific
chr9	96923233	96923418	24	cell-type specific
chrX	134200292	134200490	24	cell-type specific
chrX	137794327	137794461	24	cell-type specific
chrX	49086999	49087144	24	cell-type specific
chrY	15455553	15455687	24	cell-type specific
chrY	6953775	6953925	24	cell-type specific
chr1	115583242	115583376	23	cell-type specific
chr1	118214778	118214937	23	cell-type specific
chr1	150039425	150039607	23	cell-type specific
chr1	154172002	154172222	23	cell-type specific
chr1	177752323	177752459	23	cell-type specific
chr1	18573113	18573318	23	cell-type specific
chr1	189677915	189678049	23	cell-type specific
chr1	20796017	20796165	23	cell-type specific
chr1	214996637	214996778	23	cell-type specific
chr1	2510000	2510159	23	cell-type specific
chr1	2982831	2982991	23	cell-type specific
chr1	39598866	39599035	23	cell-type specific
chr1	54059888	54060052	23	cell-type specific
chr1	54457820	54458012	23	cell-type specific
chr1	5890905	5891076	23	cell-type specific
chr1	8375973	8376162	23	cell-type specific
chr1	848298	848460	23	cell-type specific
chr1	8491190	8491348	23	cell-type specific
chr1	9606746	9606928	23	cell-type specific
chr10	113616566	113616700	23	cell-type specific
chr10	125043736	125043870	23	cell-type specific
chr10	12991396	12991530	23	cell-type specific
chr10	21530181	21530351	23	cell-type specific
chr10	43761416	43761588	23	cell-type specific
chr10	71423423	71423603	23	cell-type specific
chr10	73804169	73804348	23	cell-type specific
chr10	88352222	88352356	23	cell-type specific
chr10	88517016	88517151	23	cell-type specific
chr10	99079922	99080213	23	cell-type specific
chr11	128647013	128647167	23	cell-type specific
chr11	16904935	16905069	23	cell-type specific
chr11	17912006	17912142	23	cell-type specific
chr11	1891199	1891409	23	cell-type specific
chr11	64332964	64333147	23	cell-type specific
chr11	66089851	66089997	23	cell-type specific
chr11	94031452	94031586	23	cell-type specific
chr12	105352025	105352174	23	cell-type specific
chr12	105379119	105379253	23	cell-type specific
chr12	107130214	107130387	23	cell-type specific
chr12	115296298	115296499	23	cell-type specific
chr12	25288914	25289093	23	cell-type specific
chr12	53086138	53086345	23	cell-type specific
chr12	56771085	56771219	23	cell-type specific
chr12	66337657	66337791	23	cell-type specific
chr12	66460102	66460283	23	cell-type specific
chr12	68728068	68728202	23	cell-type specific
chr12	69677982	69678222	23	cell-type specific
chr12	73908552	73908712	23	cell-type specific
chr13	103685850	103686023	23	cell-type specific
chr13	114275954	114276142	23	cell-type specific
chr13	114462091	114462249	23	cell-type specific
chr13	22830487	22830647	23	cell-type specific
chr13	29391431	29391586	23	cell-type specific
chr13	49794443	49794658	23	cell-type specific
chr13	62259884	62260018	23	cell-type specific
chr14	100075897	100076103	23	cell-type specific
chr14	103765068	103765202	23	cell-type specific
chr14	103990508	103990679	23	cell-type specific
chr14	104623947	104624111	23	cell-type specific
chr14	107130842	107131048	23	cell-type specific
chr14	31769667	31769831	23	cell-type specific
chr14	47911493	47911649	23	cell-type specific
chr14	54259742	54259876	23	cell-type specific
chr14	65239234	65239395	23	cell-type specific
chr14	92947801	92947935	23	cell-type specific
chr15	54269141	54269275	23	cell-type specific
chr15	71865239	71865373	23	cell-type specific
chr15	75475129	75475263	23	cell-type specific
chr15	81127728	81127942	23	cell-type specific
chr15	85291926	85292148	23	cell-type specific
chr16	15616949	15617088	23	cell-type specific
chr16	1991442	1991646	23	cell-type specific
chr16	50482464	50482655	23	cell-type specific
chr16	55677261	55677462	23	cell-type specific
chr16	66694746	66694915	23	cell-type specific
chr16	89002525	89002694	23	cell-type specific
chr17	1802800	1802934	23	cell-type specific
chr17	41867729	41867896	23	cell-type specific
chr17	43669837	43669971	23	cell-type specific
chr17	45054793	45054982	23	cell-type specific
chr17	61193733	61193867	23	cell-type specific
chr17	71336418	71336608	23	cell-type specific
chr18	24980048	24980182	23	cell-type specific
chr18	4182320	4182479	23	cell-type specific
chr19	16947023	16947157	23	cell-type specific
chr19	4580369	4580528	23	cell-type specific
chr19	54926392	54926534	23	cell-type specific
chr19	58249842	58249976	23	cell-type specific
chr2	113950167	113950336	23	cell-type specific
chr2	113957943	113958097	23	cell-type specific
chr2	115301063	115301197	23	cell-type specific
chr2	12573844	12573978	23	cell-type specific
chr2	136015888	136016051	23	cell-type specific
chr2	139234578	139234758	23	cell-type specific
chr2	152649238	152649401	23	cell-type specific
chr2	177894373	177894526	23	cell-type specific
chr2	194448851	194449004	23	cell-type specific
chr2	201570476	201570647	23	cell-type specific
chr2	216673801	216673955	23	cell-type specific
chr2	232982237	232982392	23	cell-type specific
chr2	24247053	24247275	23	cell-type specific
chr2	7520061	7520195	23	cell-type specific
chr2	82461566	82461733	23	cell-type specific
chr20	1158403	1158609	23	cell-type specific
chr20	15680115	15680381	23	cell-type specific
chr20	16730333	16730598	23	cell-type specific
chr20	24763508	24763684	23	cell-type specific
chr20	25203887	25204034	23	cell-type specific
chr20	30157017	30157160	23	cell-type specific
chr20	39521452	39521629	23	cell-type specific
chr20	39980941	39981116	23	cell-type specific
chr20	40322829	40323018	23	cell-type specific
chr20	46601018	46601203	23	cell-type specific
chr20	55866168	55866348	23	cell-type specific
chr20	6103678	6103867	23	cell-type specific
chr20	6397111	6397340	23	cell-type specific
chr21	47746097	47746231	23	cell-type specific
chr22	20793507	20793647	23	cell-type specific
chr22	21126500	21126670	23	cell-type specific
chr22	22652895	22653063	23	cell-type specific
chr22	24298837	24299009	23	cell-type specific
chr22	49827921	49828101	23	cell-type specific
chr3	122734561	122734714	23	cell-type specific
chr3	156880514	156880648	23	cell-type specific
chr3	182622089	182622230	23	cell-type specific
chr3	50250073	50250207	23	cell-type specific
chr3	58273924	58274058	23	cell-type specific
chr3	80608960	80609138	23	cell-type specific
chr4	141347931	141348108	23	cell-type specific
chr4	155269923	155270057	23	cell-type specific
chr4	15739008	15739142	23	cell-type specific
chr4	34955131	34955356	23	cell-type specific
chr4	42403446	42403580	23	cell-type specific
chr5	115625124	115625258	23	cell-type specific
chr5	132013060	132013247	23	cell-type specific
chr5	138110150	138110304	23	cell-type specific
chr5	138721126	138721344	23	cell-type specific
chr5	145386904	145387079	23	cell-type specific
chr5	149330782	149330943	23	cell-type specific
chr5	172437594	172437792	23	cell-type specific
chr5	25766876	25767010	23	cell-type specific
chr5	43313067	43313249	23	cell-type specific
chr5	52260115	52260249	23	cell-type specific
chr5	7762478	7762612	23	cell-type specific
chr5	99856186	99856336	23	cell-type specific
chr6	141516732	141516900	23	cell-type specific
chr6	157542418	157542553	23	cell-type specific
chr6	169845451	169845615	23	cell-type specific
chr6	170752685	170752819	23	cell-type specific
chr6	20127676	20127810	23	cell-type specific
chr6	36804233	36804373	23	cell-type specific
chr6	39759177	39759317	23	cell-type specific
chr6	40504259	40504409	23	cell-type specific
chr6	77418394	77418592	23	cell-type specific
chr6	91207264	91207407	23	cell-type specific
chr7	149484685	149484851	23	cell-type specific
chr7	24807607	24807750	23	cell-type specific
chr7	302864	303002	23	cell-type specific
chr7	40226351	40226485	23	cell-type specific
chr7	80873663	80873797	23	cell-type specific
chr8	17352796	17352944	23	cell-type specific
chr8	38084208	38084410	23	cell-type specific
chr9	100996802	100996936	23	cell-type specific
chr9	112322809	112323006	23	cell-type specific
chr9	115644733	115644903	23	cell-type specific
chr9	126197007	126197198	23	cell-type specific
chr9	134731590	134731790	23	cell-type specific
chr9	138508265	138508427	23	cell-type specific
chr9	16640710	16640875	23	cell-type specific
chr9	19409113	19409360	23	cell-type specific
chr9	93220927	93221073	23	cell-type specific
chr9	97315482	97315794	23	cell-type specific
chrX	152760665	152760804	23	cell-type specific
chrX	25053103	25053237	23	cell-type specific
chrY	15850625	15850759	23	cell-type specific
chr1	155231387	155231648	22	cell-type specific
chr1	157094951	157095085	22	cell-type specific
chr1	178007013	178007162	22	cell-type specific
chr1	192777658	192777931	22	cell-type specific
chr1	20198763	20198925	22	cell-type specific
chr1	227635507	227635655	22	cell-type specific
chr1	25916744	25916899	22	cell-type specific
chr1	26356497	26356635	22	cell-type specific
chr1	27823380	27823514	22	cell-type specific
chr1	29444026	29444181	22	cell-type specific
chr1	43390213	43390365	22	cell-type specific
chr1	51070359	51070512	22	cell-type specific
chr1	57223910	57224044	22	cell-type specific
chr10	112902016	112902159	22	cell-type specific
chr10	120844935	120845075	22	cell-type specific
chr10	131297051	131297221	22	cell-type specific
chr10	134065962	134066116	22	cell-type specific
chr10	1445829	1445976	22	cell-type specific
chr10	37814460	37814594	22	cell-type specific
chr10	38265241	38265412	22	cell-type specific
chr10	45485905	45486097	22	cell-type specific
chr10	5385693	5385827	22	cell-type specific
chr10	75670301	75670445	22	cell-type specific
[truncated: 25,975 more rows]

## Sheet: Peaks with ssgRNA located
ssgRNA infromation					HepG2 CTCF peak information
Chr	Start	End	ssgRNA sequence	Strand	Chr	Start	End	Frequency shared in cell lines	Specific/Common
chr10	100022498	100022521	GCCAAGTACGGCCAAGGGGA	-	chr10	100022414	100022548	52	common
chr10	100091771	100091795	CCGAGGAGCAGGAGAGAGAGG	-	chr10	100091766	100091945	51	common
chr10	1001873	1001896	GCTCAGCCAGTGGGGAACAG	-	chr10	1001791	1001936	2	cell-type specific
chr10	100185600	100185623	GTACTGCCTGCCCCTGTGGC	-	chr10	100185544	100185734	55	common
chr10	101492590	101492613	CTTGGTAGCTGCGTGACTTT	-	chr10	101492405	101492685	50	common
chr10	102214630	102214653	GCGGCAGCAAGGCTGGGGGC	+	chr10	102214472	102214695	5	cell-type specific
chr10	102242455	102242478	AGCGGACTGCGCAGCACCAG	-	chr10	102242433	102242629	55	common
chr10	102295456	102295479	CCAGGTCGTCCCTATTCCGT	+	chr10	102295441	102295643	55	common
chr10	102295552	102295575	AACGCGGAGCCGAGGCCTGA	-	chr10	102295441	102295643	55	common
chr10	102489408	102489431	CTGGCGCTGGGTCGCGGTTC	+	chr10	102489313	102489498	41	common
chr10	102503502	102503525	TGGCGCTCCCGGGTTTGCTT	-	chr10	102503445	102503649	54	common
chr10	102638454	102638477	GCAGGGCTATGCTTCTCTGC	-	chr10	102638320	102638506	55	common
chr10	102759047	102759069	GGGTTGGAGGCGGCAACCT	-	chr10	102758928	102759120	55	common
chr10	102771946	102771969	CTTCTCCGGCCTGTCGAGGA	+	chr10	102771901	102772035	10	cell-type specific
chr10	102774209	102774232	CAGGCTTTGGCCACGAGGTG	-	chr10	102774133	102774341	55	common
chr10	102810140	102810161	TGGCGGCGCGGGGCAGGC	-	chr10	102810063	102810264	55	common
chr10	102902161	102902184	GTGAGTTCTGGGCGCCCTCT	+	chr10	102902068	102902293	54	common
chr10	102974572	102974594	ATCCGGGCTCCGGATGGGT	+	chr10	102974533	102974746	55	common
chr10	103540982	103541005	GTGGCCCTGGGCCTGGGGGA	-	chr10	103540930	103541133	55	common
chr10	103600654	103600677	CTGAGCTCGGTCCCCCGACT	-	chr10	103600497	103600696	54	common
chr10	103817554	103817577	GTCCTCTAGTGGCCCTGTCT	-	chr10	103817510	103817688	10	cell-type specific
chr10	103989673	103989696	CTAGCCTCCCTGAGACCACG	+	chr10	103989599	103989796	54	common
chr10	103989744	103989766	GCGTGCGTGCGGGGGACGT	-	chr10	103989599	103989796	54	common
chr10	104144009	104144032	GTGATGTCCCCGTGGAGTTG	-	chr10	104143904	104144090	36	common
chr10	104356397	104356420	CTGTTAGAAGGGGAAACTGC	+	chr10	104356294	104356535	54	common
chr10	104375190	104375213	GAGGCTGAGCTGGGTGCTGT	-	chr10	104375113	104375286	49	common
chr10	104404723	104404746	CTGCAGGTGCGTCTGCACGT	-	chr10	104404693	104404912	52	common
chr10	104429753	104429776	CCAGAGCAGCAGCTGACTCT	+	chr10	104429489	104429955	49	common
chr10	104438628	104438651	GGTGTCTCCAGGTGCCTGTG	+	chr10	104438589	104438821	55	common
chr10	104489134	104489157	TGAACATGTTGACAAAGGTA	+	chr10	104489071	104489272	55	common
chr10	104489155	104489178	GGTCTGGGGCCGCTGCAGCA	+	chr10	104489071	104489272	55	common
chr10	105352596	105352617	GGGGAAGGTGCCCTGGGA	+	chr10	105352559	105352795	55	common
chr10	105358642	105358663	GTGAGTTAGGGGGTGAGG	+	chr10	105358583	105358819	54	common
chr10	105607795	105607818	GGCCAATACCTCACAGTCTG	-	chr10	105607765	105607943	34	common
chr10	105615002	105615025	GATGCTCGCCTACTGCGTGC	-	chr10	105614878	105615094	29	cell-type specific
chr10	106051322	106051344	GGGGAAGGAGGAAGCGCGC	-	chr10	106051176	106051501	53	common
chr10	106051333	106051356	CCTCCTTCCCCTTGTGTTCC	+	chr10	106051176	106051501	53	common
chr10	106051376	106051399	GTTCTCCTTCGTCCCTCTGG	+	chr10	106051176	106051501	53	common
chr10	112440918	112440941	GTCAGGGCTGTGCGAGAAGC	+	chr10	112440900	112441089	51	common
chr10	114206650	114206673	GAGAGTCCTGGCGAGGGCGC	-	chr10	114206543	114206753	42	common
chr10	11466573	11466596	CTGATTTGCGTGGCTTGGCC	-	chr10	11466526	11466798	55	common
chr10	114868363	114868386	CTTGCCCAACCTCTCAGGCT	-	chr10	114868288	114868557	55	common
chr10	115580428	115580451	GCCAGCCCAGCCCAGCGCGA	-	chr10	115580398	115580532	32	cell-type specific
chr10	117332724	117332747	GCCGGAAGCAGGGATGGAGT	+	chr10	117332691	117332878	45	common
chr10	11740218	11740242	CTCACCTCAGGGCCTTTGCAT	+	chr10	11740187	11740375	37	common
chr10	11800117	11800140	AGGGACCTGCTTGGCTGTGC	+	chr10	11799991	11800217	55	common
chr10	118442053	118442075	CTGCCTTTTCCATGAACAC	+	chr10	118441878	118442121	55	common
chr10	118556606	118556629	CGCACTTGCTGCAGCCACCA	+	chr10	118556515	118556731	55	common
chr10	118569240	118569261	GTGGGGACAGGCCTGGAG	-	chr10	118569195	118569329	49	common
chr10	118976354	118976377	AGGACCCTTCCTCGCGGCGA	-	chr10	118976162	118976437	55	common
chr10	11923562	11923585	CACAAGGCCACACCTGGCTG	+	chr10	11923444	11923610	20	cell-type specific
chr10	120000972	120000995	GTGAAACTGTGCATATGCCG	+	chr10	120000884	120001076	54	common
chr10	120303836	120303859	GCTGGATCCACACACGCTCC	+	chr10	120303705	120303918	54	common
chr10	120386646	120386667	GCTGCTGTCACCAGCAGG	-	chr10	120386574	120386792	43	common
chr10	120899100	120899123	CAGGCTGGAACGTGGACCGG	+	chr10	120899039	120899287	54	common
chr10	120899117	120899140	CGGAGGGAGTAGGCAGGAGA	+	chr10	120899039	120899287	54	common
chr10	120899136	120899159	ATGGGCCAGGCAGTGCCAGC	+	chr10	120899039	120899287	54	common
chr10	121011629	121011652	TGGCGTGCTCGTGCCGATAG	+	chr10	121011511	121011721	10	cell-type specific
chr10	121176641	121176664	CTGTCGCCTGCCCTTGTGCT	+	chr10	121176462	121176688	55	common
chr10	121368003	121368026	TGCGGCTGGTGAGACAGCAG	+	chr10	121367896	121368113	52	common
chr10	123646687	123646710	TCTCGATCTACACCACCACC	+	chr10	123646624	123646844	55	common
chr10	124027694	124027717	CCAAGGCCAGGGTTCTGCCT	+	chr10	124027645	124027872	54	common
chr10	124058461	124058484	GCAGAGGGTGCCAAGAGCTC	+	chr10	124058309	124058605	55	common
chr10	124463523	124463546	TGGGCTCTGGCTCCCTCTGG	+	chr10	124463444	124463617	55	common
chr10	124485451	124485474	CTGAGGGCAGGGGCTGAGGA	-	chr10	124485433	124485570	20	cell-type specific
chr10	124739985	124740008	CGGCGGTCTTCATGCTGCCC	-	chr10	124739758	124739999	55	common
chr10	125211330	125211353	TGCACAGTGGACCAAGGCTA	-	chr10	125211271	125211405	13	cell-type specific
chr10	125319056	125319078	AGGGGCAGTGCGCATGACC	+	chr10	125318961	125319134	55	common
chr10	125332936	125332959	TGTGCCTCCTGGATGGGAGC	-	chr10	125332816	125333018	52	common
chr10	125332960	125332983	GAGGCGCTGGATTAGCAGGT	-	chr10	125332816	125333018	52	common
chr10	125754299	125754322	CGGCCACCAGGGGGCAGCGC	+	chr10	125754182	125754412	55	common
chr10	125755383	125755405	GGGGGATGTGGGACAGGGA	+	chr10	125755358	125755581	51	common
chr10	125755451	125755474	TGGGAGTCTGGGCACACAGT	+	chr10	125755358	125755581	51	common
chr10	125755463	125755486	CACACAGTGGGTCGCAGGGG	+	chr10	125755358	125755581	51	common
chr10	125755520	125755543	TGGGTGCCATCTTCAGGTTG	-	chr10	125755358	125755581	51	common
chr10	126077930	126077953	CGCGGGCTCGCAGGACGGCC	+	chr10	126077871	126078118	55	common
chr10	126077979	126078002	CTGCCGTCCCAACGCGCGTG	+	chr10	126077871	126078118	55	common
chr10	126218843	126218866	GAGCAGGTGGCGTGGGGAGG	-	chr10	126218772	126218976	55	common
chr10	126218877	126218900	GGGCGCCTTGCTGCCAGGGA	+	chr10	126218772	126218976	55	common
chr10	126749926	126749949	GCCACCGTCAAGGGAAGTGT	-	chr10	126749744	126749969	55	common
chr10	127623012	127623035	TGCCACCTACTGCCCAAGGC	-	chr10	127622930	127623109	54	common
chr10	128286779	128286802	GTGCGCAGCATCCTGTGTAT	-	chr10	128286680	128286873	53	common
chr10	12889832	12889855	TGAAGATGAGGGCTGGAAGC	+	chr10	12889672	12889861	50	common
chr10	129809784	129809807	GTCACCTCTGGCATAGCACC	+	chr10	129809676	129809893	55	common
chr10	12991460	12991483	TCAGTGGAGCCACCCGATGG	+	chr10	12991396	12991530	23	cell-type specific
chr10	129956527	129956550	CAGTCACCTGCAGGTGCCGC	+	chr10	129956452	129956636	7	cell-type specific
chr10	131687552	131687575	GAGCTCGTGGCACAGGAGCG	+	chr10	131687465	131687677	54	common
chr10	131687673	131687696	GTCTGTCCCAAGTGTGTTGC	-	chr10	131687465	131687677	54	common
chr10	13262091	13262114	GTGGACACACGACCGGCAGG	+	chr10	13262016	13262184	46	common
chr10	133956152	133956174	GGCCTCGTGGGGAGAGCGT	+	chr10	133956043	133956297	54	common
chr10	134018438	134018461	ACGGCTCACAGGGCCGGTCC	-	chr10	134018319	134018504	12	cell-type specific
chr10	134036729	134036752	TGGCGCCAGAGGACAGCAGA	+	chr10	134036648	134036887	54	common
chr10	134174497	134174520	CTGTGATGTGCAACCTAGGC	-	chr10	134174329	134174560	54	common
chr10	134257274	134257297	CCTGACTCAGACCTGACTGT	+	chr10	134257222	134257445	44	common
chr10	134257349	134257372	CCAGCGCCCAGCCAGCAGCT	+	chr10	134257222	134257445	44	common
chr10	134260474	134260496	TGGGAGAAGCGGGAGGAGG	+	chr10	134260390	134260543	49	common
chr10	13482597	13482620	GGACAGAGCACGCCCGCGGG	+	chr10	13482573	13482774	55	common
chr10	13482628	13482651	GGCAGGTGCCCGGCGAGGAG	+	chr10	13482573	13482774	55	common
chr10	135132302	135132325	CTCCCCTTTCCCCGCGGCCC	+	chr10	135132251	135132491	53	common
chr10	135132346	135132367	GCTGACGCCTCCAGGAGG	-	chr10	135132251	135132491	53	common
chr10	135333888	135333910	TGGCAGCGCGGCTGGGCGG	-	chr10	135333658	135333964	54	common
chr10	183258	183280	AGGAGGGAGTGGTGCAGGT	+	chr10	183165	183299	47	common
chr10	21964285	21964308	TGATGATGCTCTTGGCCTGT	-	chr10	21964170	21964390	55	common
chr10	22021340	22021363	GCTTCCTGCCAGGCGTCTGA	+	chr10	22021207	22021427	55	common
chr10	22839803	22839825	GTGGTGGTGAACGGGGTGG	-	chr10	22839758	22839947	55	common
chr10	24485585	24485608	GGGACGCAACTGTCACCAGC	-	chr10	24485468	24485637	55	common
chr10	25402124	25402147	GCCAAACATTTGCTGCGCCA	-	chr10	25402129	25402338	55	common
chr10	29228341	29228364	CTCATGTTGCACGGTTCCAG	+	chr10	29228245	29228485	32	cell-type specific
chr10	29734546	29734569	GTAGAAGCCTGCCCTCTGCT	-	chr10	29734464	29734630	53	common
chr10	29738156	29738179	GAACCTTTGCATCTGGCGAG	-	chr10	29738039	29738228	54	common
chr10	29785447	29785469	CCGTGTCCTGGCCGGTGCC	+	chr10	29785398	29785612	55	common
chr10	30291478	30291501	GCACAACCCGCCTGGATGTG	+	chr10	30291495	30291663	55	common
chr10	30291572	30291595	CTCTTGTGCAAGCTGAGCAG	-	chr10	30291495	30291663	55	common
chr10	30648660	30648683	GCCATTTCTAGGGTGCTATT	+	chr10	30648659	30649127	55	common
chr10	30648733	30648756	GTAAGAACCAGCTAAGCTCC	-	chr10	30648659	30649127	55	common
chr10	30648803	30648826	CTGCCCCACAGGCTCCCTCC	-	chr10	30648659	30649127	55	common
chr10	30648807	30648830	GAGGGAGCCTGTGGGGCAGC	+	chr10	30648659	30649127	55	common
chr10	30648818	30648841	TGGGGCAGCTGGCACTCTGG	+	chr10	30648659	30649127	55	common
chr10	30648819	30648841	GGGGCAGCTGGCACTCTGG	+	chr10	30648659	30649127	55	common
chr10	30648819	30648842	GGGGCAGCTGGCACTCTGGA	+	chr10	30648659	30649127	55	common
chr10	30649031	30649055	GTGACACCTGGAGGATTTCAC	-	chr10	30648659	30649127	55	common
chr10	30649036	30649059	GAAATCCTCCAGGTGTCACC	+	chr10	30648659	30649127	55	common
chr10	3085921	3085944	GCCATCTTGTGGTGACGAGC	+	chr10	3085834	3086042	55	common
chr10	31015881	31015904	GGAAGGCTGTGGCCAGCAGG	+	chr10	31015792	31015976	55	common
chr10	32059430	32059453	CTGCACATGTGGTGCCTGTG	-	chr10	32059317	32059521	54	common
chr10	3239724	3239747	GCCAGGCCTCTGCTGCCCTC	-	chr10	3239604	3239818	55	common
chr10	3281934	3281957	CCCCGGACGACCCGCCGCAC	+	chr10	3281852	3282073	54	common
chr10	33405358	33405381	CTTGCTAGGTTGCGGAGCGT	-	chr10	33405223	33405445	50	common
chr10	36331240	36331263	ATTCCTCACACGGCAGAGAG	-	chr10	36331195	36331329	10	cell-type specific
chr10	38265292	38265315	GGGAGGTTGGCTGGCTGCGC	-	chr10	38265241	38265412	22	cell-type specific
chr10	38265292	38265316	GGGGAGGTTGGCTGGCTGCGC	-	chr10	38265241	38265412	22	cell-type specific
chr10	38265646	38265669	CCATCTTGGATGACGTCGTG	+	chr10	38265590	38265800	55	common
chr10	43186248	43186271	CCCAACGGTTCCTGTGGGTG	-	chr10	43186121	43186284	25	cell-type specific
chr10	43700575	43700598	CAGCTTGCAGGGAGGTGGGC	-	chr10	43700430	43700715	55	common
chr10	43700617	43700639	AGCAGGGCAGGGAGGGAGA	+	chr10	43700430	43700715	55	common
chr10	45420875	45420898	GCACTCTGTAGGACAGGCAT	-	chr10	45420726	45420896	40	common
chr10	45428351	45428374	CACTGCTCTCTTATGCTCGC	-	chr10	45428210	45428430	53	common
chr10	45485915	45485938	CTGAGTTTCTGGGGAGGCGA	+	chr10	45485905	45486097	22	cell-type specific
chr10	45960639	45960662	CTGTGGGGCTGTGGAGCCTG	-	chr10	45960493	45960717	53	common
chr10	46054076	46054099	GTGGCTGCACTTCTGGTGCC	+	chr10	46054009	46054177	0	cell-type specific
chr10	46983815	46983838	GCCACTAGGAGGAGCTGGCG	+	chr10	46983526	46983976	55	common
chr10	46983884	46983907	CGCCAGTTGGTGGAAAGAGC	+	chr10	46983526	46983976	55	common
chr10	4750753	4750776	CCACAGTGCAGGCTGTTACT	+	chr10	4750699	4750874	45	common
chr10	47599900	47599923	GTGGGAGTCATGGCTAGTGT	-	chr10	47599804	47600061	54	common
chr10	47599949	47599970	CTCCCTCTCTCCATGGGG	+	chr10	47599804	47600061	54	common
chr10	47627498	47627521	GGCACGCTGCCATCTAGTGG	+	chr10	47627423	47627630	53	common
chr10	48398600	48398623	GCCTGACACACAGCACCCCC	-	chr10	48398519	48398714	55	common
chr10	48427073	48427096	CCTGCTTCCTGGTGCTCCGC	-	chr10	48426929	48427131	54	common
chr10	50189645	50189667	CTGCTTCCTGTGCTTGGTG	-	chr10	50189491	50189665	55	common
chr10	52035613	52035636	CTGCCCTCTGGTGGCTTCCG	+	chr10	52035554	52035706	55	common
chr10	5336130	5336152	AGGCAGCCAGGACGACTGG	+	chr10	5336147	5336361	53	common
chr10	5336163	5336186	CTGCTGTGTCCCCTAGAGAA	+	chr10	5336147	5336361	53	common
chr10	54540052	54540075	GTGGCCATGCTTAGGACTGC	+	chr10	54539974	54540162	54	common
chr10	57389615	57389637	GCGGCCCTCCCTCTAGCGG	+	chr10	57389551	57389725	38	common
chr10	61382210	61382233	CTGCCATTGCCTTAACTGGA	+	chr10	61382205	61382364	53	common
chr10	61569299	61569322	GTGCCAGCAGGGGGCAGCCA	-	chr10	61569214	61569401	54	common
chr10	62493237	62493260	GTCGCAGCGGACACAGCAGG	-	chr10	62493117	62493361	30	cell-type specific
chr10	63510925	63510948	CGAAGCAAAGCAAGGGGTGG	-	chr10	63510746	63510988	54	common
chr10	63656816	63656839	CCCACCACAGCTCTTGAGAC	+	chr10	63656819	63656977	55	common
chr10	6487777	6487801	CTTTGCTCAATTTGCTGGGCC	+	chr10	6487758	6487918	55	common
chr10	65632240	65632263	TCGCAGTGCACTGCCTGGCG	+	chr10	65632169	65632368	52	common
chr10	71152543	71152566	AGAGGATGGCCTGATTCCTG	-	chr10	71152364	71152553	55	common
chr10	71168749	71168772	CGTGAGGCCGATGACGCTGT	+	chr10	71168664	71168820	46	common
chr10	72083806	72083829	GAGAGAACAGGATGAGGAGG	+	chr10	72083708	72083920	10	cell-type specific
chr10	72139522	72139545	GGCACCACCTCCCCATCTGG	-	chr10	72139418	72139651	55	common
chr10	72300430	72300453	TGTGCTGCAGGGCTCTTCTG	+	chr10	72300326	72300550	55	common
chr10	72309699	72309722	TTGGTCGTGACCTCTGCAGT	+	chr10	72309604	72309887	55	common
chr10	72663258	72663281	ATGGGTCTCGTTTCCTGAGG	-	chr10	72663136	72663361	55	common
chr10	72685638	72685661	CCAGTCCCAGGGCTGAGGGT	-	chr10	72685504	72685723	55	common
chr10	73078793	73078816	GCACTGCCCATGCTTGCGAT	-	chr10	73078781	73078962	53	common
chr10	73144094	73144116	TGGGGAGGTGACCCAGAGC	+	chr10	73144002	73144256	54	common
chr10	73144094	73144117	TGGGGAGGTGACCCAGAGCT	+	chr10	73144002	73144256	54	common
chr10	73246415	73246438	CACAGTTGCATGGTCAGTAG	+	chr10	73246358	73246528	55	common
chr10	73456675	73456698	GGTGGGGAGGAGGTTACCCT	-	chr10	73456532	73456783	55	common
chr10	73456692	73456715	TTGGAATCCCTGGCTGGGGT	-	chr10	73456532	73456783	55	common
chr10	73571903	73571926	GTGGAGGGAGGGTGAAGGGA	-	chr10	73571792	73571973	55	common
chr10	73821406	73821429	CTTGAGGGCGCCTGAGGGCC	-	chr10	73821327	73821531	47	common
chr10	74097114	74097136	GCCAGCTCCCAGCCAGAGG	+	chr10	74096999	74097212	55	common
chr10	74097179	74097202	CCCAGGGTCAGCTACACAGT	-	chr10	74096999	74097212	55	common
chr10	75632283	75632305	GTTCTGCCGCCTGGTGGGC	+	chr10	75632230	75632364	24	cell-type specific
chr10	75639546	75639569	TCAGCGTGGACGACCTGGGC	+	chr10	75639515	75639715	53	common
chr10	78662897	78662920	CTTGCAGGCACAGCGGGGCG	-	chr10	78662813	78662983	45	common
chr10	79807203	79807226	ACTATGCAGACTCCCACAAG	+	chr10	79807103	79807316	54	common
chr10	80697647	80697670	GCTGCCCTCTCCCGGGGATG	-	chr10	80697557	80697711	30	cell-type specific
chr10	80826214	80826237	AGGCCACCCACAGGCTGAGG	+	chr10	80826203	80826390	35	common
chr10	80826216	80826239	GCCACCCACAGGCTGAGGAG	+	chr10	80826203	80826390	35	common
chr10	80826337	80826360	TGCCACCTACAGGGAGGGCG	+	chr10	80826203	80826390	35	common
chr10	80955311	80955334	GTCCAGGAGCCCGGAGGCGG	+	chr10	80955299	80955474	54	common
chr10	80955330	80955353	GAGGCAGCGGCCCAGCTGAG	+	chr10	80955299	80955474	54	common
chr10	80955396	80955419	TGTCACCTCCCAAAGGTGGC	+	chr10	80955299	80955474	54	common
chr10	80962495	80962518	CCAGCCTGGGCAGTGGGAGC	-	chr10	80962375	80962561	53	common
chr10	81053027	81053049	GGGAGGTGGAGGAGTGGGG	-	chr10	81052858	81053044	52	common
chr10	81247575	81247598	GCCAGCCAACCTGCTCTGGG	-	chr10	81247405	81247640	55	common
chr10	81262457	81262480	CACAGGTTTGCCTCCTCTGT	-	chr10	81262337	81262489	31	cell-type specific
chr10	81322047	81322069	CTTGCCACCGACCGCCAGG	+	chr10	81321931	81322169	53	common
chr10	81368715	81368738	GCCTACCACTGACCACCAGG	-	chr10	81368613	81368823	53	common
chr10	82459382	82459404	GGTGGCCTCAGGGAAGCCC	+	chr10	82459342	82459550	55	common
chr10	82459382	82459405	GGTGGCCTCAGGGAAGCCCA	+	chr10	82459342	82459550	55	common
chr10	86189959	86189982	CAAGCAGGAAGTGAAGGCCA	-	chr10	86189777	86189976	55	common
chr10	86334066	86334089	CTCACAGAGGCACCATCTGC	-	chr10	86333991	86334168	33	cell-type specific
chr10	86425879	86425901	GAGCATTGCAGGTTGCGGT	-	chr10	86425766	86425918	49	common
chr10	86475808	86475832	GCCAAGTTGGCTGCCACTAGG	-	chr10	86475709	86475921	52	common
chr10	88109462	88109485	CTTGTCCGGTGTTCTTTCTC	-	chr10	88109329	88109526	43	common
chr10	88159777	88159800	GCGCGTCGCGGGCTAGGTCC	-	chr10	88159637	88159855	55	common
chr10	88343947	88343970	CTCGCACACCCATCACCAGT	-	chr10	88343877	88344011	31	cell-type specific
chr10	88699432	88699454	CAGGCGCAAGGCTGGGTTG	-	chr10	88699232	88699470	55	common
chr10	88699433	88699456	GTCAGGCGCAAGGCTGGGTT	-	chr10	88699232	88699470	55	common
chr10	88726517	88726540	AGGAAGGGAGCAGCCTCTGT	-	chr10	88726396	88726640	53	common
chr10	88963330	88963353	TCTGGCTGTGACCGCAGAGC	-	chr10	88963272	88963463	41	common
chr10	88963409	88963432	GGAGACACGCTGCGGGAGGC	+	chr10	88963272	88963463	41	common
chr10	88963429	88963452	TGGCGCTCGGGTCCGGCTGC	+	chr10	88963272	88963463	41	common
chr10	89265183	89265206	GTGAGAACTACGGCCGCCTG	+	chr10	89265144	89265363	55	common
chr10	90488273	90488295	GCTGAGCCTGCAGAGCTGG	+	chr10	90488252	90488468	47	common
chr10	93058170	93058193	GCGCCCTCTGGAGGCCGTGA	-	chr10	93058053	93058288	55	common
chr10	93311796	93311819	GGCCTTGGTCCCGCTGAGGT	+	chr10	93311711	93311884	52	common
chr10	96437574	96437597	GTTGGCATGTGGAAAGGTGT	-	chr10	96437561	96437724	29	cell-type specific
chr10	97134485	97134508	TGTGCACCAATGCTTTGGGG	+	chr10	97134425	97134660	54	common
chr10	98135321	98135343	CCCGGGTCAGCCTTGAATC	-	chr10	98135088	98135349	54	common
chr10	98271129	98271152	GCGATGATAAGGACAACCTG	-	chr10	98271087	98271240	55	common
chr10	98273600	98273623	GTTGCCTCGACGAAGACAGG	-	chr10	98273503	98273657	51	common
chr10	98797210	98797233	GAGACGGCGTGGGCAGGAGG	+	chr10	98797164	98797402	55	common
chr10	98819469	98819491	CTGAGGGCTGGGCAGGAGG	+	chr10	98819417	98819573	19	cell-type specific
chr10	98841499	98841522	GTTGGCTGAGGGTCATCTGC	+	chr10	98841457	98841669	54	common
chr10	98970484	98970507	GTGGGACAAGAGCTGCCCGC	-	chr10	98970343	98970551	55	common
chr10	99167447	99167470	AGGGGTGGAGAGGTGAGCCC	-	chr10	99167272	99167463	54	common
chr10	99223613	99223636	GCTGTGCAGGCCTCTATGCC	-	chr10	99223461	99223664	55	common
chr10	99313494	99313517	GGTTAATGTAAGCTGAGCCC	-	chr10	99313346	99313582	54	common
chr10	99332162	99332185	GTTTCCAGGCATCCAGCAGG	+	chr10	99332067	99332289	55	common
chr1	100925253	100925276	CTGGCCACAAGATGGTGCGC	-	chr1	100925185	100925335	55	common
chr1	101490959	101490982	GTTGGGCCTGGGAGATGCCA	-	chr1	101490935	101491158	0	cell-type specific
chr1	10270364	10270387	CTTTGGCCAGCCCGCACCCC	+	chr1	10270260	10270499	55	common
chr1	10488238	10488261	GTCATGGCAACATTGCCAGC	+	chr1	10488185	10488383	55	common
chr1	10490361	10490384	CCGCAGAGCAAGCTGAGCAG	+	chr1	10490320	10490515	55	common
chr1	10490362	10490384	CGCAGAGCAAGCTGAGCAG	+	chr1	10490320	10490515	55	common
chr1	10490362	10490385	CGCAGAGCAAGCTGAGCAGG	+	chr1	10490320	10490515	55	common
chr1	10554934	10554957	CTGCCACCTCCCCAACGTCA	-	chr1	10554783	10555058	55	common
chr1	1057632	1057656	GTCCCTGAGCCCGCCTGCAGG	+	chr1	1057543	1057735	55	common
chr1	106452581	106452604	CTGAGCTGTGCCATTTGCAG	+	chr1	106452519	106452692	21	cell-type specific
chr1	10752523	10752546	GGGGCAGGCAGGTTCTCTGT	+	chr1	10752476	10752704	49	common
chr1	10752620	10752643	CACACCCTTCCCGGGCGCAG	+	chr1	10752476	10752704	49	common
chr1	109289170	109289193	CGCAGCCTCCGTCCGGGAGT	+	chr1	109288989	109289231	55	common
chr1	109736457	109736480	GGAGCTCCCTCTGCTGCTGT	+	chr1	109736366	109736575	55	common
chr1	109782252	109782275	CCACAGAGCTCTCAGGGCCA	-	chr1	109782124	109782323	55	common
chr1	109782267	109782290	CTCTGTGGGAGGGCAGAAGC	+	chr1	109782124	109782323	55	common
chr1	109806457	109806479	GCGGCTGGACAGAAGTGGC	+	chr1	109806270	109806654	55	common
chr1	109806461	109806484	CTGGACAGAAGTGGCTGGGC	+	chr1	109806270	109806654	55	common
chr1	110075102	110075125	CTGGCTGTCAAGGCAGTCTG	+	chr1	110075002	110075180	55	common
chr1	110075655	110075677	GTCAGACACCAGGCACTGC	+	chr1	110075585	110075739	53	common
chr11	101785937	101785960	GAGCAGGAGGAGGAGGAAGC	+	chr11	101785865	101786120	46	common
chr1	110182974	110182997	GCTCCTGCTTGCCCTTTGGC	+	chr1	110182932	110183091	55	common
chr1	11021119	11021142	GGCATCTGGGCTTCAAGGGC	+	chr1	11021139	11021359	55	common
chr1	11021295	11021318	GGGCACCTGTTTGACATCCC	-	chr1	11021139	11021359	55	common
chr1	110316443	110316466	GTTCCTGGCTGTCTGCGGAG	+	chr1	110316398	110316581	54	common
chr11	10329530	10329551	ACCGCACGTACTGCTTGG	-	chr11	10329450	10329636	55	common
chr11	1051232	1051254	CCGCACCACAGCCCGGAGG	-	chr11	1051172	1051390	54	common
chr11	1051256	1051279	GCCAGGTGCCACCTGCTGGC	+	chr11	1051172	1051390	54	common
chr1	110523466	110523489	TGCCAGTCAGGCTCCCCACC	-	chr1	110523391	110523540	52	common
chr1	110523468	110523492	TGGTGGGGAGCCTGACTGGCA	+	chr1	110523391	110523540	52	common
chr1	110596624	110596647	GGCTGTGCTGCCACCTGGTG	-	chr1	110596519	110596731	55	common
chr1	110596659	110596682	CCGCAGTCTGTCCTGGGCTT	+	chr1	110596519	110596731	55	common
chr1	110648814	110648837	TGGTGATCTGCAGGAGGAGG	+	chr1	110648823	110649038	55	common
chr11	10757427	10757449	CAGGCACTGGGCTGGGACT	-	chr11	10757370	10757651	55	common
chr11	10814136	10814159	TGCAACCCGACCCACCTGCC	+	chr11	10814082	10814292	54	common
chr11	10814220	10814243	CAGGAGGCTGAGCTGGACCC	-	chr11	10814082	10814292	54	common
chr11	108288489	108288511	GTCAGCAGGTGGCGGGCTA	+	chr11	108288437	108288604	47	common
chr11	111169920	111169943	GGGGACCGCAGCTGGACAGC	-	chr11	111169851	111170041	40	common
chr11	111293797	111293820	GGAACCTGAGGTGTCTGCTG	-	chr11	111293767	111294021	53	common
chr1	111173597	111173620	AGACAGCAGCCCTCCTGCAC	-	chr1	111173456	111173642	55	common
chr11	111749741	111749762	CCGGGCGCTGGAGGCAGG	+	chr11	111749693	111749947	55	common
chr11	11177625	11177648	TCTCCCTCGGCTTCCTCCCT	+	chr11	11177623	11177780	55	common
chr11	113403604	113403627	ATCACTCTGGCGCCCTCTGG	+	chr11	113403530	113403692	55	common
chr11	113906961	113906984	GGCTTGGAGGACGTGGCCGC	+	chr11	113906855	113907148	52	common
chr11	114051412	114051435	CTCACCTGGGAAGGGCGCAA	-	chr11	114051296	114051447	45	common
chr11	115860814	115860837	CCAGCCATGGGGCGTGTGGG	-	chr11	115860751	115860891	52	common
chr11	116562634	116562656	CCGGGCACCTGGCTGGCCT	-	chr11	116562516	116562715	55	common
chr11	116662065	116662088	GCTCACTGAGGCGCGGGACC	-	chr11	116662008	116662234	55	common
chr11	116662098	116662121	CAGCTACGGAGTTGTCAAGG	+	chr11	116662008	116662234	55	common
chr11	116969386	116969409	CCACCGCCAGCTCCCGGAGG	-	chr11	116969343	116969477	35	common
chr11	116969441	116969464	CCGCCACCTTTCCCGAGTGG	+	chr11	116969343	116969477	35	common
chr11	117052078	117052101	CCACGTGTCCCTGGTGGCAG	+	chr11	117052084	117052284	50	common
chr11	117297139	117297162	GCCCAGCTTCGTTCCATCTC	-	chr11	117296960	117297227	55	common
chr11	117817886	117817909	GTTTGCGGTTGTTCTAGCCT	-	chr11	117817735	117817926	55	common
chr11	117924182	117924205	GTCCTGGAGTCCCACCTGCA	+	chr11	117924187	117924396	55	common
chr11	118393635	118393658	CTGCTTTCCCATGCTTCTTT	+	chr11	118393618	118393790	50	common
chr11	118478702	118478725	GGGAGAGTCTGGATAGGGCC	-	chr11	118478551	118478732	53	common
chr11	118530387	118530409	GTCCTGTTCAGGGTCGGGA	+	chr11	118530226	118530503	55	common
chr11	118530387	118530410	GTCCTGTTCAGGGTCGGGAG	+	chr11	118530226	118530503	55	common
chr11	118549737	118549760	CCAGCAGGCTCTTGGACCTC	+	chr11	118549707	118549939	13	cell-type specific
chr11	119039383	119039407	CACTGGGTGTCACTGGCGCTT	+	chr11	119039305	119039501	55	common
chr11	119039441	119039464	CGGGGATGGAGGCAGGGAGG	+	chr11	119039305	119039501	55	common
chr11	119194430	119194453	GGGCACCAGGGGGCGCTCTC	-	chr11	119194324	119194542	55	common
chr11	119210848	119210871	ATCGGTGGCGATGTCCGAGC	-	chr11	119210720	119210890	52	common
chr11	119404999	119405022	GTCCCATTCACACAAGCTAC	-	chr11	119404627	119405084	55	common
chr11	11988596	11988619	TGGAGACCAGCTGTGTGTCT	-	chr11	11988474	11988677	55	common
chr1	111991270	111991293	GGCTGACCTCACTTGGGTTG	-	chr1	111991143	111991296	1	cell-type specific
chr1	111991271	111991293	GGCTGACCTCACTTGGGTT	-	chr1	111991143	111991296	1	cell-type specific
chr1	111991271	111991294	TGGCTGACCTCACTTGGGTT	-	chr1	111991143	111991296	1	cell-type specific
chr1	112024435	112024458	CACGAGGGCAGCAGAGACCC	+	chr1	112024362	112024537	55	common
chr1	112051021	112051044	GCACGTTTCTGTTGTCACTC	+	chr1	112050900	112051113	55	common
chr11	12065936	12065958	TGGGGGAAGGGAATGGCTG	+	chr11	12065856	12066073	55	common
chr11	120673116	120673139	CCTGTCTGCACGAAGTCCCC	-	chr11	120673036	120673271	55	common
chr11	121250095	121250116	GGGCCTCCAACCAGGAGG	-	chr11	121250007	121250188	31	cell-type specific
chr11	121250095	121250118	GTGGGCCTCCAACCAGGAGG	-	chr11	121250007	121250188	31	cell-type specific
chr11	12143862	12143884	CTGTGCTCCAAGGCTCCTG	-	chr11	12143717	12143909	49	common
chr11	1224299	1224322	GGGCCTGGCACCTGAAAAGG	-	chr11	1224278	1224479	55	common
chr11	122451421	122451444	CAGGGCAGAGGCAGAGGCGG	-	chr11	122451269	122451460	55	common
chr11	12309227	12309250	CCCCAGGACACTGGGACCAA	-	chr11	12309191	12309385	46	common
chr11	12309247	12309270	GGGAAGAGCAGGGCTGTGGC	+	chr11	12309191	12309385	46	common
chr11	12309274	12309296	GAGGCGGCAGGCCCTGCCA	+	chr11	12309191	12309385	46	common
chr11	12309274	12309297	GAGGCGGCAGGCCCTGCCAG	+	chr11	12309191	12309385	46	common
chr11	12309277	12309298	GCGGCAGGCCCTGCCAGG	+	chr11	12309191	12309385	46	common
chr11	123447822	123447846	GTCTAGATGTCGATTGCCCGT	+	chr11	123447783	123447989	55	common
chr11	123447922	123447945	AAACCGGGAGAGAGGGGCCC	-	chr11	123447783	123447989	55	common
chr11	123940172	123940195	GTTCCCTTAGCCCCCTCACA	+	chr11	123940134	123940349	52	common
chr11	123940285	123940308	CACCCTTAGACGCTGCCATG	-	chr11	123940134	123940349	52	common
chr11	125439132	125439153	GAGGAGGCGACGGGGAGG	+	chr11	125439095	125439300	54	common
chr11	125439143	125439164	GGGGAGGAGGCGACGCGG	+	chr11	125439095	125439300	54	common
chr11	125496313	125496336	GGAAGGAGGAGGGAGAGGTG	-	chr11	125496318	125496471	49	common
chr11	125812084	125812107	CAGCCATCCTCAGGAGCCAG	+	chr11	125811879	125812179	55	common
chr11	12621223	12621245	GCGGCCGCCAGGGGGAGCC	+	chr11	12621120	12621331	55	common
chr11	128987665	128987688	GTACCGCCATCTAGTGTGTA	-	chr11	128987611	128987780	55	common
chr11	129234183	129234206	GGCGTGTGTGCTGTGGAATC	-	chr11	129234072	129234321	53	common
chr11	12936293	12936316	AATCGCTCTGCACTGGGCCT	-	chr11	12936159	12936364	54	common
chr11	129641508	129641531	GTGATCATGCAGCCACCTGG	-	chr11	129641462	129641635	21	cell-type specific
chr11	129751657	129751680	GTACCAACTCAGCCCAGTTG	+	chr11	129751566	129751759	55	common
chr11	130731969	130731992	CCCAGCCTTGCCTTTCTTGA	+	chr11	130731936	130732157	54	common
chr11	131558010	131558032	GGAGCCGCAGATGCCGCGG	+	chr11	131557946	131558126	55	common
chr11	131558036	131558059	TGGCCGTTCTGGGGAGCTGC	-	chr11	131557946	131558126	55	common
chr11	131564929	131564950	GCACCCTCCCGGCGGCGG	-	chr11	131564823	131565021	55	common
chr1	113259018	113259041	GCCAGGGCTGAGAGCAGTCC	+	chr1	113258968	113259126	55	common
chr1	113261411	113261435	GTCCATCCTCACTGAACCTGC	+	chr1	113261380	113261579	53	common
chr1	113261457	113261480	CCCTGGCGGCCGAGGGCAAG	-	chr1	113261380	113261579	53	common
chr1	113351924	113351946	CAGGGAGTGGGCAGCCTGG	+	chr1	113351912	113352118	55	common
chr11	134230273	134230296	CTCGTGTCTCCGGCATGGGG	+	chr11	134230217	134230424	54	common
chr11	134945885	134945907	TGTCCGTAGCTGCCAGCAG	+	chr11	134945592	134945978	53	common
chr11	134945886	134945907	GTCCGTAGCTGCCAGCAG	+	chr11	134945592	134945978	53	common
chr1	11397692	11397715	GGACGATGCGCCTCCTGCCT	+	chr1	11397608	11397859	55	common
chr1	114889278	114889301	GCTGAGGCGCGATGGCTGCG	-	chr1	114889167	114889439	53	common
chr1	114889288	114889311	ATCGCGCCTCAGCAGCGCCG	+	chr1	114889167	114889439	53	common
chr11	1536947	1536970	ACTAGATGGACCACTGCCGT	-	chr11	1536826	1537026	55	common
chr1	11538781	11538804	CTGGAGAGGAGCGGGAGCGC	+	chr1	11538747	11538968	54	common
chr1	11538951	11538974	CCACCGCGCGGATCGGCAGG	+	chr1	11538747	11538968	54	common
chr11	15848576	15848598	GGCAGGGGCTGCCTAGGCC	+	chr11	15848490	15848733	53	common
chr1	116012553	116012576	CAATGGCATCCCCTTTGAGG	-	chr1	116012397	116012575	53	common
chr11	1650267	1650290	GGCAGACACTGCCTCTGCGC	-	chr11	1650111	1650342	54	common
chr11	16635438	16635461	CGGGAGGTCGCCAAGGCTGC	-	chr11	16635279	16635508	55	common
chr11	16967625	16967647	TTTCCCAACCTCTCCTCAT	+	chr11	16967502	16967739	55	common
chr1	11702619	11702642	GGCAGGACAGACACAGCTTG	+	chr1	11702576	11702772	55	common
chr1	11705913	11705936	CCTGTGTGGCGTCCAGCAGG	-	chr1	11705819	11706052	55	common
chr1	11724232	11724255	TGAGCCGCCCGCCGCCTGGA	+	chr1	11724129	11724346	54	common
chr1	11724233	11724256	GAGCCGCCCGCCGCCTGGAG	+	chr1	11724129	11724346	54	common
chr11	17549880	17549903	CCCAGGGCCGGGGTGCCTGG	-	chr11	17549772	17549962	55	common
chr11	17620556	17620579	GCTCCTCATGGCTTTGCTGC	+	chr11	17620566	17620790	55	common
chr1	11771366	11771389	CACGGGCATGTGCGAGCACT	-	chr1	11771150	11771422	54	common
chr1	11809406	11809429	GCCACCAGCTGGTTGAGGGT	+	chr1	11809322	11809511	52	common
chr11	18127745	18127767	GTCCTCGATAGGATGGGGT	-	chr11	18127605	18127797	55	common
chr1	11845427	11845450	GCTCCCTTCACCTGTTTCCA	-	chr1	11845273	11845504	55	common
chr11	1846414	1846437	GTAGGGCAGGGAGGGAGCAG	+	chr11	1846238	1846566	46	common
chr1	118790467	118790490	TGAGACAATAGCTCAGATGG	-	chr1	118790348	118790514	50	common
chr11	18797369	18797391	GTCAGGTTTAACGAGGCAG	+	chr11	18797310	18797510	55	common
chr11	1891306	1891329	CAGCGCCTCCGTCCTCACAA	-	chr11	1891199	1891409	23	cell-type specific
chr11	189789	189812	GGCCCTCTTGCTTACAGTGG	+	chr11	189721	190327	55	common
chr11	189938	189961	GTCCCCATCTGCCAGCAGGC	-	chr11	189721	190327	55	common
chr11	189939	189962	TGTCCCCATCTGCCAGCAGG	-	chr11	189721	190327	55	common
chr11	190001	190024	GTGCCCCCAGCGGCCAGAAG	-	chr11	189721	190327	55	common
chr11	190088	190111	TGGTCCTCTTGCTCATGGTG	+	chr11	189721	190327	55	common
chr11	190109	190132	GGTGCCCGTACGCCGCCTGC	+	chr11	189721	190327	55	common
chr11	190110	190132	GTGCCCGTACGCCGCCTGC	+	chr11	189721	190327	55	common
chr11	190120	190141	GCCGCCTGCTGGCAGCTG	+	chr11	189721	190327	55	common
chr11	190124	190147	CAGTGTCCTCAGCTGCCAGC	-	chr11	189721	190327	55	common
chr11	190128	190151	CTGGCAGCTGAGGACACTGC	+	chr11	189721	190327	55	common
chr11	190129	190152	TGGCAGCTGAGGACACTGCA	+	chr11	189721	190327	55	common
chr11	190170	190193	AGTCGTCGTACGCCCCCTGC	+	chr11	189721	190327	55	common
chr11	190240	190263	ACGCCACCTGCGGGCAGATG	+	chr11	189721	190327	55	common
chr11	190243	190264	TCCCCATCTGCCCGCAGG	-	chr11	189721	190327	55	common
chr11	190243	190265	GTCCCCATCTGCCCGCAGG	-	chr11	189721	190327	55	common
chr11	190243	190266	AGTCCCCATCTGCCCGCAGG	-	chr11	189721	190327	55	common
chr11	190246	190269	CCTAGTCCCCATCTGCCCGC	-	chr11	189721	190327	55	common
chr11	1897815	1897837	GTCGGGACGGGGACCGAGC	+	chr11	1897672	1897913	53	common
chr1	11898837	11898859	CAGGGTTCAAAGCTAGTGT	-	chr1	11898776	11899008	55	common
chr1	11898855	11898878	CGAGTGCACGGAAGCCGAGC	-	chr1	11898776	11899008	55	common
chr1	11898969	11898992	GTGAAGAGCAACATTTCAGG	-	chr1	11898776	11899008	55	common
chr11	19034906	19034929	CTGGTTGGTATCCTGCCAGG	+	chr11	19034848	19034982	39	common
chr11	1903897	1903920	GCCAGGCAGGTGCAGGGGGT	-	chr11	1903743	1903943	55	common
chr11	1903934	1903957	GCCACACAGAGGGGCCATTC	-	chr11	1903743	1903943	55	common
chr11	192131	192154	CCCTAAACGCGTGTGGCCCA	+	chr11	192081	192244	53	common
chr11	192160	192183	GGATGCCATCAGCCACTAGG	+	chr11	192081	192244	53	common
chr11	192215	192238	CTCAGTCAGAGGGCTGGACT	+	chr11	192081	192244	53	common
chr11	19579389	19579412	TGGACAGTCAGTGGCCACGT	+	chr11	19579337	19579472	55	common
chr11	1968520	1968544	CAGGCGGCGGCCGTGCGGGGC	+	chr11	1968439	1968575	35	common
chr11	20631913	20631936	CGTTCCTGCAGCAATGCAGC	-	chr11	20631730	20631953	54	common
chr1	12074444	12074467	CAGGAACAGGAACCTAGATC	-	chr1	12074430	12074578	30	cell-type specific
chr1	12091438	12091461	CACCAGCAGCCCTTTTCACC	+	chr1	12091381	12091637	52	common
chr1	12139727	12139750	GTCCTCTGCTCCTCCTTCCA	+	chr1	12139723	12139923	55	common
chr1	12185060	12185083	CCGGTGCCAATGCTGCCAGA	-	chr1	12184920	12185131	55	common
chr1	1225690	1225713	GAGGTAGTAGCCACAGGAGC	-	chr1	1225662	1225844	53	common
chr1	1225750	1225773	CTCACCCCAGGCAGGGTGCC	-	chr1	1225662	1225844	53	common
chr1	1225774	1225797	CAGAGTGGGAGGCAGCGAGC	-	chr1	1225662	1225844	53	common
chr1	12256898	12256920	GGAAAGGGAAGGTGACAGC	-	chr1	12256787	12256947	19	cell-type specific
chr1	12256898	12256921	GGGAAAGGGAAGGTGACAGC	-	chr1	12256787	12256947	19	cell-type specific
chr11	22646777	22646800	CCACAGGCTGCTGAGAAACC	+	chr11	22646611	22646812	55	common
chr1	12269058	12269081	GCTCCATCATGTCCTCATGT	-	chr1	12268950	12269207	55	common
chr1	12269088	12269110	CCCAGGACTGTCCACCAGG	-	chr1	12268950	12269207	55	common
chr1	1227316	1227338	GCCTAGCCACCTCAGCTGC	+	chr1	1227320	1227529	55	common
chr1	1227353	1227376	GCAGGCCCCACGGACACACT	+	chr1	1227320	1227529	55	common
chr1	1227444	1227466	GTTTCAGCTCACCGGGCGC	-	chr1	1227320	1227529	55	common
chr1	12304354	12304377	TGGAGATGGAGATCACCCAA	-	chr1	12304270	12304461	51	common
chr1	12335564	12335587	GTGAAAGCAGCTCACGCCCA	+	chr1	12335517	12335731	55	common
chr1	12335585	12335608	GGCAAGGCAGGGGAGAAGTG	+	chr1	12335517	12335731	55	common
chr1	12335610	12335632	GCAGCATTGGGTCAGCAGG	+	chr1	12335517	12335731	55	common
chr1	12336464	12336487	GTTGGAGCAGCATACCCGCG	+	chr1	12336421	12336624	42	common
chr1	1235635	1235658	GTGGACTCTATGGCAGGTGC	-	chr1	1235531	1235666	54	common
chr1	1237487	1237510	GCCCTCTGCTGGTGAGGATG	-	chr1	1237413	1237594	54	common
chr11	2442036	2442059	CTGGGCCCGTGTGGTACAGG	+	chr11	2442053	2442210	55	common
chr11	2552857	2552880	CCCGGAGGAGAGGGAGCTGC	-	chr11	2552734	2552927	54	common
chr1	12661415	12661438	GTTACGTTACGAGCAGCAGG	+	chr1	12661317	12661544	53	common
chr1	12680080	12680103	CAGGAACGCCGCTGGGTTGG	-	chr1	12679930	12680155	55	common
chr1	12680088	12680111	CTAGTTAGCAGGAACGCCGC	-	chr1	12679930	12680155	55	common
chr11	27326202	27326224	TGCAGTTGCGCCTGGGAGC	-	chr11	27326190	27326382	7	cell-type specific
chr11	27720633	27720656	TACTGGGGGCGGGAGGCTGG	-	chr11	27720571	27720742	55	common
chr11	27720721	27720743	GGGGAGGCGAGGAGGAGGA	-	chr11	27720571	27720742	55	common
chr1	1280079	1280102	GCTGAGGCCGCCACAGTGAG	+	chr1	1280069	1280332	48	common
chr1	1280145	1280168	GTGGTGGCCTCGGTGTCCGT	-	chr1	1280069	1280332	48	common
chr1	12820456	12820479	GGGAGATCAGGCTCTGCCAC	-	chr1	12820432	12820616	38	common
chr11	2858318	2858341	GGCACGTAGGGCGGAGGAAG	+	chr11	2858309	2858530	18	cell-type specific
chr11	2858369	2858392	GGACACTCGAGAGGCTGCCC	-	chr11	2858309	2858530	18	cell-type specific
chr11	2952100	2952123	GGGCAGTGCCGGCAGAGGGC	+	chr11	2952002	2952312	55	common
chr1	1307701	1307724	CCTCGCTGGCTGGCACGTCC	+	chr1	1307519	1307728	55	common
chr11	3113143	3113166	GCTCAGCACACCTGGAACGG	+	chr11	3113083	3113306	55	common
chr11	3113245	3113268	GCGGGACAGCAGGAGGCTCC	-	chr11	3113083	3113306	55	common
chr11	3238573	3238596	CTCTGAGGCCCAGGACTGGC	-	chr11	3238474	3238784	55	common
chr11	32395979	32396002	GCCGCTTCTCTTCCTGGTTC	+	chr11	32395869	32396078	55	common
chr11	33087272	33087295	CTGAGGGAAGCTGCAGAGGC	+	chr11	33087225	33087435	53	common
chr11	33087332	33087355	CATCGCTGAGCTGCAGGTCC	-	chr11	33087225	33087435	53	common
chr11	34196036	34196059	GTCCCCTGGTGGCACAGAGC	-	chr11	34195948	34196156	54	common
chr11	3438335	3438358	GCAGGCTGCTTCTCCATGGC	+	chr11	3438340	3438474	50	common
chr11	364571	364594	GGCAGAGCCATCTGTGACCA	-	chr11	364547	364748	49	common
chr1	1373582	1373605	GTTGGACTGTGGGTTGGAGA	+	chr1	1373603	1373737	8	cell-type specific
chr1	1376343	1376366	GGCAGGTGGCTGGAATGCAG	+	chr1	1376355	1376605	55	common
chr1	13843857	13843880	AAAGGGCAGCGGCCGTGGGA	-	chr1	13843795	13843973	43	common
chr11	3846011	3846034	CCATCCCCCTGAAGTGGAAG	+	chr11	3846022	3846241	54	common
chr1	1397723	1397746	CCTGTGGGTGCTGAGTGGAC	+	chr1	1397647	1397788	0	cell-type specific
chr1	14137882	14137905	GGGATGCCCCATCAGCCAGC	-	chr1	14137779	14137993	51	common
chr1	14155483	14155506	CACAGCCCCAGGTGAGCTGC	-	chr1	14155447	14155635	55	common
chr1	14155527	14155550	TGGGGTCCTCCCTCAAGTCC	+	chr1	14155447	14155635	55	common
chr1	14155554	14155577	AGGACATCCGGCTTTTGCCC	+	chr1	14155447	14155635	55	common
chr1	14292420	14292443	GAGGACCCAGCCCTTCTTGC	-	chr1	14292428	14292580	48	common
chr1	1440352	1440375	TCCAGCTCCACAGGTTCGGT	+	chr1	1440234	1440570	53	common
chr11	44117233	44117256	GGGGCCGGTAACCGGGATCC	-	chr11	44117068	44117270	55	common
chr1	144859932	144859954	CTGAGCCACCTGGTGGCAG	-	chr1	144859844	144860016	32	cell-type specific
chr1	145061970	145061993	CTGGTCTGCTGATCGACAGG	+	chr1	145061911	145062051	32	cell-type specific
chr1	145061983	145062006	CGACAGGAGGTGGAGCTCAG	+	chr1	145061911	145062051	32	cell-type specific
chr11	45127261	45127284	CAGAGCCTGAGGCTACGTCC	-	chr11	45127154	45127336	55	common
chr11	45274085	45274108	CCTCAAGGTCAGCGTCAGGG	+	chr11	45274049	45274206	55	common
chr11	45274092	45274114	GTCAGCGTCAGGGTGGCTG	+	chr11	45274049	45274206	55	common
chr11	45274092	45274115	GTCAGCGTCAGGGTGGCTGT	+	chr11	45274049	45274206	55	common
chr1	145293419	145293442	CGGCCCTTGGTCCAGTGAGA	+	chr1	145293406	145293540	31	cell-type specific
chr1	145589411	145589434	TCGCGTTATGGCCGAGGTGC	-	chr1	145589359	145589578	55	common
chr11	45677135	45677158	ACGGAGCAGAGGCCGCAGCC	-	chr11	45676854	45677142	55	common
chr11	45864797	45864820	GCGGCTGGGCGGGGAACACC	-	chr11	45864761	45864951	54	common
chr11	45864807	45864829	GTTCGGTTTGCGGCTGGGC	-	chr11	45864761	45864951	54	common
chr11	45894472	45894495	CACAGCACAGCCCTCTGTCC	-	chr11	45894358	45894568	55	common
chr11	46389363	46389386	GTGGGATTGAGCCCGCTCCC	+	chr11	46389241	46389534	55	common
chr11	46391249	46391272	ACTAGCGCTGCCTGCGGAGT	+	chr11	46391059	46391283	55	common
chr11	46411051	46411074	GCCAGGCGTATCTGGATTCC	-	chr11	46411016	46411234	55	common
chr11	46544115	46544137	GCCCCCTACATGCAACAGG	+	chr11	46544035	46544169	42	common
chr11	46639482	46639505	AGATCCACAGCCTCCCACCC	-	chr11	46639381	46639593	55	common
chr11	46691621	46691644	GAGGGACATCTCCTGGCATG	-	chr11	46691508	46691659	46	common
chr11	47183233	47183256	GGGTGGGCACACCAAGGGCT	-	chr11	47183205	47183360	54	common
chr11	47376962	47376985	GTCCAAGCACAAGGAGGCGC	-	chr11	47376835	47377067	47	common
chr11	47395682	47395705	CTGGAACCGCTTGGGAAGGT	+	chr11	47395546	47395732	55	common
chr11	47433883	47433906	CCCTCACCACCTGCAGGGGG	-	chr11	47433792	47433996	54	common
chr11	47433912	47433935	CCAGCTGTTGCTGCTGCTGC	-	chr11	47433792	47433996	54	common
chr11	47433966	47433989	GGAACATCTTCTCCAACGCC	-	chr11	47433792	47433996	54	common
chr11	4744224	4744247	GCCATCCAGCAGCTTCCTGT	+	chr11	4744158	4744359	18	cell-type specific
chr11	47475927	47475950	AAGACTACACTGCCATCTGC	+	chr11	47475843	47476063	54	common
chr1	14769354	14769377	CTCACCTTGGCTGGTGCTGT	-	chr1	14769289	14769443	6	cell-type specific
chr1	149204454	149204477	CTCATAGCACATGCACTCTG	-	chr1	149204331	149204517	54	common
chr1	150138408	150138431	GGGCACTCCTGTTATGTTTC	-	chr1	150138287	150138443	55	common
chr1	150505152	150505175	GTGTGCGCCAGGCCCTGTTC	+	chr1	150505130	150505319	55	common
chr1	150533522	150533545	CAGCCTGCAGGGCCTGGGGC	-	chr1	150533455	150533661	55	common
chr1	150533529	150533553	CAGGCCCTGCAGGCTGGTCAT	+	chr1	150533455	150533661	55	common
chr1	15058525	15058548	GTGGGATAGTGCAGTGCTGT	+	chr1	15058490	15058707	52	common
chr1	151043560	151043583	GGAGGGGGACGGGGAGGAAG	+	chr1	151043580	151043795	54	common
chr1	151148488	151148511	CCGGTGCCGGGGGAGAGGGT	+	chr1	151148399	151148711	53	common
chr1	151148593	151148616	GAGGCTCTCAGGGCTGGGCA	-	chr1	151148399	151148711	53	common
chr1	151507314	151507337	GTGGCATCATGGGCAGGTCG	-	chr1	151507243	151507434	54	common
chr1	151707644	151707667	TGGGAAGGAAGGGCAATGTC	+	chr1	151707634	151707807	54	common
chr1	151986290	151986313	GTCGATTTGCTGCCACCATG	+	chr1	151986203	151986405	55	common
chr1	152020518	152020541	CACACTCTGCCTGCAGCCTC	+	chr1	152020425	152020589	54	common
chr1	152413432	152413455	GGCAGCTGTAAGGGTAGCTG	+	chr1	152413404	152413613	55	common
chr1	15242055	15242078	CTGCCCAGCAGCACTGCTGA	+	chr1	15241916	15242142	55	common
chr1	152469933	152469956	TTTCCTACCACACCACCAGG	+	chr1	152469878	152470012	46	common
chr1	1533148	1533170	TGGGCCAGCTGTGTTGGCG	-	chr1	1533097	1533330	47	common
chr1	153545138	153545161	CAGCAGCGGCCTCTAGCTGT	-	chr1	153545031	153545243	54	common
chr1	153600151	153600174	CGAGCGCCCCCACTTGGTCA	+	chr1	153600050	153600242	52	common
chr1	153722009	153722032	CTGTGTGCTGTGCTCTGCCC	+	chr1	153721991	153722184	54	common
chr1	153744493	153744516	GTCGGTGGTGGTGGTGGTGG	+	chr1	153744454	153744659	51	common
chr1	15391154	15391177	CAGGAGACAGTATGGCCACC	-	chr1	15391062	15391196	16	cell-type specific
chr1	15427120	15427143	CCCTGTACCACGTATACAGC	-	chr1	15426947	15427147	55	common
chr1	154519012	154519035	CAGGGCCAAGGCTTCCTGGG	+	chr1	154518977	154519156	55	common
chr1	15455142	15455165	CTCCACTATAGGCAGCGCCT	+	chr1	15455086	15455298	55	common
chr1	15455217	15455239	AGCTGGGCTAGGCTGGTGA	-	chr1	15455086	15455298	55	common
chr1	15478866	15478889	CCCGCATGTTACAACTCTGC	+	chr1	15478882	15479080	46	common
chr1	154934384	154934407	AGGGTCGTCTCCGCTAGCGG	+	chr1	154934320	154934531	50	common
chr1	154990084	154990106	GTGGGACAGGGTAAGGGGT	+	chr1	154990035	154990319	51	common
chr1	154990171	154990194	GCTCGCTCCAGTGGCCGCGG	-	chr1	154990035	154990319	51	common
chr1	154990173	154990196	CAGCTCGCTCCAGTGGCCGC	-	chr1	154990035	154990319	51	common
chr1	155017558	155017581	GTGAGTGCCCTCTTGTGGAG	-	chr1	155017445	155017641	55	common
chr1	155034199	155034222	GTCTCAGGGGAGGAAGGTGT	-	chr1	155034106	155034268	54	common
chr1	155034235	155034258	GGCATGCGCAGAGGGCTTGG	-	chr1	155034106	155034268	54	common
chr1	155058741	155058764	GGAAGGCATGCGAGGTGAGC	-	chr1	155058606	155058815	55	common
chr1	155064033	155064056	TCTAAGCCTCGCTGCCACGT	+	chr1	155063980	155064177	55	common
chr1	155220510	155220533	CGGAGCCCTGCAGCTCCAGC	+	chr1	155220509	155220807	54	common
chr1	155220606	155220629	TGGACACTGTGGGCGGCAGG	+	chr1	155220509	155220807	54	common
chr1	155948448	155948471	CGGGACGCCAGGGTTTGTGT	+	chr1	155948398	155948608	46	common
chr1	155995903	155995926	GGTGGATGCAGTGGCAGAGC	-	chr1	155995741	155995959	54	common
chr1	156066592	156066615	GGCCAAGGGGAGAGACCGAC	-	chr1	156066483	156066656	54	common
chr1	15631406	15631427	CTGCACCTGGCCACCAGG	-	chr1	15631304	15631585	55	common
chr1	15631406	15631428	CCTGCACCTGGCCACCAGG	-	chr1	15631304	15631585	55	common
chr1	15631406	15631429	CCCTGCACCTGGCCACCAGG	-	chr1	15631304	15631585	55	common
chr1	156450615	156450638	TGGGGCTCACCCCATAGCGC	+	chr1	156450572	156450730	55	common
chr1	156595839	156595862	CTGGTGGCATGGGGCGCCCC	-	chr1	156595750	156595896	55	common
chr1	156627411	156627432	GGAACGGCCGCCATCTGC	+	chr1	156627369	156627532	55	common
chr1	156629831	156629853	GGGGAGGTTCCCAGCCCTG	+	chr1	156629781	156630055	55	common
chr1	156629841	156629863	GCCCAGTCCACCGCAGGGC	-	chr1	156629781	156630055	55	common
chr1	156659384	156659407	GAAGTCCTGCCCCAGCCGGG	+	chr1	156659309	156659547	54	common
chr1	156659422	156659444	CCCGCTAGACCCCTTCGCT	+	chr1	156659309	156659547	54	common
chr1	156808891	156808912	GCAGGGCAGGGGAGGGGT	+	chr1	156808715	156808953	55	common
chr1	156860087	156860110	CACCAAGAGGCTCCAGCAGA	-	chr1	156860012	156860192	55	common
chr1	156860188	156860209	TGAGAGGTGTGTGTGGGT	-	chr1	156860012	156860192	55	common
chr1	156862220	156862242	GCGGATGCTAGCCGCGAGG	+	chr1	156862180	156862349	55	common
chr11	57016639	57016662	GCCAAACAGCCAGGCTCAGG	-	chr11	57016621	57016807	50	common
chr1	15757743	15757766	CGAGGGTCTGGGGTCTTCCC	+	chr1	15757709	15757929	55	common
chr1	15757869	15757892	CAGGCCCTGGGTAGCATGTG	-	chr1	15757709	15757929	55	common
chr1	15757870	15757894	CTCAGGCCCTGGGTAGCATGT	-	chr1	15757709	15757929	55	common
chr1	15757913	15757937	GTGGAACTGAAAGTCTCAAGT	-	chr1	15757709	15757929	55	common
chr1	15828069	15828092	GCTGACGTGGCGCCACCATG	+	chr1	15827978	15828208	55	common
chr1	15828107	15828130	CCTCCGCAGGCTGCGTGACC	-	chr1	15827978	15828208	55	common
chr1	15828117	15828140	CAGCCTGCGGAGGCAAAGCA	+	chr1	15827978	15828208	55	common
chr1	15828120	15828143	GGTCCTTGCTTTGCCTCCGC	-	chr1	15827978	15828208	55	common
chr11	58347218	58347239	GGGAAACGGTGTGACATC	-	chr11	58347067	58347314	55	common
chr11	59521624	59521647	GTTGTCCCCGCCTTAGTACC	-	chr11	59521519	59521688	55	common
chr1	159906275	159906298	CGGGACGCTGCGGATCCGCC	-	chr1	159906259	159906460	54	common
chr1	159976290	159976313	TGCCGACAGAGGGCGCAGGC	-	chr1	159976214	159976409	54	common
chr1	160048540	160048562	CAGCAAGAGAGCTGAGGAG	+	chr1	160048496	160048661	54	common
chr1	160070959	160070981	GTCCGTCAGGCCTGGGCTG	-	chr1	160070872	160071044	54	common
chr1	160261216	160261239	TGAGGGCTGTACGCAGCACC	+	chr1	160261196	160261422	55	common
chr1	160261237	160261260	GGATCATGTGCACAGGCTGC	+	chr1	160261196	160261422	55	common
chr1	160346533	160346556	GCTCTCAGCAGCTCCTAGCT	-	chr1	160346385	160346607	54	common
chr1	16066454	16066477	GGCAAAGGCTGAGGTGCACC	+	chr1	16066327	16066506	32	cell-type specific
chr1	16067931	16067953	GGCAGAGGGAGCAGAAGGT	-	chr1	16067915	16068157	55	common
chr1	16068029	16068052	GCCACCTAGTGGACCCAGGG	+	chr1	16067915	16068157	55	common
chr1	16068046	16068069	GGGAGGAGCATCAGGAAGGG	+	chr1	16067915	16068157	55	common
chr1	16068070	16068093	GCCTTCTCCTCCCACAGGCC	-	chr1	16067915	16068157	55	common
chr1	16068071	16068093	GCCTTCTCCTCCCACAGGC	-	chr1	16067915	16068157	55	common
chr11	60897391	60897414	GAACGCAGCACCTCCCGAGC	+	chr11	60897282	60897535	53	common
chr11	60909291	60909314	CAGTGCTCAGCCCTGACTGC	-	chr11	60909224	60909385	3	cell-type specific
chr1	1610499	1610521	CAGGGGGCAGCCTTCGAGG	-	chr1	1610417	1610622	45	common
chr1	161179688	161179711	GCTGCTTATATCCGGCCAGG	+	chr1	161179647	161179885	54	common
chr1	161179699	161179722	CCGGCCAGGAGGAGTGCACC	+	chr1	161179647	161179885	54	common
chr1	161179707	161179730	GAGGAGTGCACCAGGTGAGC	+	chr1	161179647	161179885	54	common
chr1	16118556	16118579	GTGCTGGAAGGGTCCTGAGG	+	chr1	16118572	16118818	55	common
chr1	16118595	16118618	GTCCCCTGCGCAGCCTGGGA	+	chr1	16118572	16118818	55	common
chr1	16118642	16118665	GCTGGTTGTCCCGGCTGTCC	+	chr1	16118572	16118818	55	common
chr1	16118803	16118826	TGCCACCCTGCGTGGTGCGT	-	chr1	16118572	16118818	55	common
chr11	61203198	61203221	GTCTGGAGGCCACCGACAGC	-	chr11	61203100	61203282	55	common
chr11	61405964	61405987	GGGCACGAGGGTGACAGGGT	-	chr11	61405957	61406197	55	common
chr11	61515226	61515249	TGGGGTTCCTGGGCTGCACT	-	chr11	61515241	61515416	54	common
chr11	61515265	61515288	GGGCAGTGAGGCCTAGGGAG	+	chr11	61515241	61515416	54	common
chr1	16173751	16173774	CGGCCAGCTCCTGGCGTTTC	-	chr1	16173689	16173874	7	cell-type specific
chr1	162026009	162026032	GCCAAACATCGCCTGTTCAT	-	chr1	162025828	162026093	54	common
chr11	62078833	62078855	GAGGAGTTCCAGCCACGGC	-	chr11	62078714	62078912	55	common
chr11	62092563	62092586	CAAGGAGGCGCTGTTTCCCC	-	chr11	62092475	62092711	54	common
chr11	62092615	62092638	TCCTGACACCTCCAATGCGG	-	chr11	62092475	62092711	54	common
chr1	162167457	162167481	GTGACTTGTCTCGGGTCACTT	+	chr1	162167427	162167583	14	cell-type specific
chr11	62380001	62380024	GGGGAAGGGGAAGCACCCCG	+	chr11	62379950	62380194	55	common
chr11	62554071	62554094	TGTCCCATGGCAGGTCGTCC	-	chr11	62554041	62554225	55	common
chr11	62673542	62673565	CTTGTCTGATAAGCAGGCTC	+	chr11	62673497	62673706	53	common
chr11	6272486	6272509	CTCTGCTTGTCCCAGGCCTC	+	chr11	6272406	6272654	55	common
chr11	6319938	6319961	CTCCCCAGTCCTCTCCGCCC	+	chr11	6319886	6320111	52	common
chr11	6320074	6320097	TATGGCTTCCCTGGGCTGGC	-	chr11	6319886	6320111	52	common
chr1	16321179	16321202	CTTGCACCCAGTCCCTGGGA	+	chr1	16321109	16321331	55	common
chr1	16321211	16321234	GTGACCAGCCTGCCAGCAGG	-	chr1	16321109	16321331	55	common
chr1	16321225	16321247	GCTGGTCACACTGCGGAGG	+	chr1	16321109	16321331	55	common
chr11	63275745	63275768	GTTGCCTTTCCCCAGCTCCT	-	chr11	63275643	63275799	47	common
chr1	16335598	16335621	TCCTGAAGGCCCCAAGGACA	+	chr1	16335497	16335796	55	common
chr1	16335640	16335663	CAGGTCTCCTTTCTCCTTGA	-	chr1	16335497	16335796	55	common
chr1	16335732	16335754	GTCCACACCTTCCCTGTCC	-	chr1	16335497	16335796	55	common
chr11	63360754	63360777	TGAGCAACAGCAGCCTCTGC	-	chr11	63360655	63360850	53	common
chr1	16344214	16344236	GAGGGGAGGTGCACAGGGA	-	chr1	16344093	16344270	12	cell-type specific
chr1	16344215	16344238	GGGAGGGGAGGTGCACAGGG	-	chr1	16344093	16344270	12	cell-type specific
chr1	16344221	16344244	TGTGCACCTCCCCTCCCCTC	+	chr1	16344093	16344270	12	cell-type specific
chr1	16359433	16359456	GCTGGAGGGTGCTGGATGTT	+	chr1	16359396	16359636	55	common
chr1	16359434	16359456	CTGGAGGGTGCTGGATGTT	+	chr1	16359396	16359636	55	common
chr11	63684033	63684056	CTGAGGTTAGGAGAGGCAGG	+	chr11	63683937	63684142	53	common
chr11	63684099	63684122	GGGGGTCGTGGAGAGCGCTG	-	chr11	63683937	63684142	53	common
chr1	16368827	16368850	TGGACATGCAGTGCCGGCTG	+	chr1	16368692	16368856	24	cell-type specific
chr11	63688721	63688744	GTCCAGGTGAGGGCAAGGGG	-	chr11	63688683	63688865	37	common
chr11	6374833	6374856	TGGCACTGCAACCTCACATG	-	chr11	6374745	6374972	55	common
chr11	63913748	63913771	CCTGTGTCTGGGGAGAGCGC	-	chr11	63913659	63913837	55	common
chr11	63916292	63916315	CCCTGGTGGGCACAGGGGCT	+	chr11	63916199	63916367	55	common
chr11	63920800	63920821	GCCTTTGCTGTTTGCCGT	-	chr11	63920641	63920829	54	common
chr11	63972182	63972205	TGGCGCTGTTGCTCAGCAGC	+	chr11	63972094	63972289	54	common
chr1	16405529	16405552	GGCAGCCGCTGGCCATCAGG	+	chr1	16405440	16405636	55	common
chr1	16405590	16405613	GTCAGCAGACGGCGGGAGGA	-	chr1	16405440	16405636	55	common
chr1	16408999	16409022	GACCAGCAGAGGGCACTCTG	+	chr1	16408879	16409090	55	common
chr11	64122906	64122929	CTGGTGGGTCCACAAAGAGT	-	chr11	64122610	64122937	51	common
chr11	64216486	64216509	ACCACCCCAAGCGAGGCAGG	-	chr11	64216363	64216572	55	common
chr11	64257445	64257468	GCGCCCCCACGTGGTCAAGC	-	chr11	64257347	64257553	55	common
chr11	64420801	64420824	CTGTGGTCCTATGGACTGGC	-	chr11	64420662	64420826	54	common
chr11	6460471	6460494	TGGCACACAGTGAATGTGGC	+	chr11	6460330	6460499	55	common
chr11	64611852	64611873	CGGGGCGGCACGGAGCGG	-	chr11	64611753	64611923	53	common
chr11	64614707	64614730	GCAGGGGTGGAGCCCACAGG	+	chr11	64614664	64614939	55	common
chr11	64614740	64614763	CTTGCTCACTGAGGCCACAC	+	chr11	64614664	64614939	55	common
chr11	6464851	6464874	CTGGCCTCTAGTTGAAGGGC	-	chr11	6464735	6464905	55	common
chr1	16481330	16481353	GCGGAAACCTCGCTCTGCCC	+	chr1	16481286	16481430	35	common
chr11	64845842	64845864	CGCTGGCTGCTTGGAGCAA	-	chr11	64845710	64845912	55	common
chr11	64885420	64885443	CACGTTTTGGTGTGACCACT	-	chr11	64885338	64885520	55	common
chr11	64972312	64972335	GCTTCGCGGTCTACGAGGTC	+	chr11	64972302	64972521	55	common
chr1	16514355	16514378	CAGGAATGTGGGCAATGAGC	+	chr1	16514319	16514553	55	common
chr1	16514392	16514415	AGCCCAGGGCTGGGATAGCG	-	chr1	16514319	16514553	55	common
chr11	65184071	65184094	GACCCTGGTTCCAGGTTGCC	-	chr11	65183889	65184096	54	common
chr11	65297762	65297785	GCAGCCACTAGGGACAGCAG	-	chr11	65297685	65297841	44	common
chr11	65308427	65308450	GCAGGGGCAGGGCGGCCGTG	+	chr11	65308432	65308610	55	common
chr1	16531718	16531740	AGAGTCTGAGGCTGGGCTC	-	chr1	16531548	16531770	48	common
chr1	165338627	165338650	ACCAACGCTCCAGCGGCACT	+	chr1	165338592	165338778	55	common
chr11	65361443	65361466	CTGGTGGCCTTGAACTGGCC	+	chr11	65361322	65361530	55	common
chr11	65405371	65405394	CCAACCGGGAGGGCTAGCGG	-	chr11	65405289	65405442	41	common
chr11	65479340	65479363	GTCAACTGGGCGCGAGAGGC	-	chr11	65479288	65479488	54	common
chr1	16562814	16562837	AACGTGCCCAACAGAGGGCC	+	chr1	16562749	16562923	48	common
chr11	65627819	65627842	GACGGGGAGGACTGGCTGGG	-	chr11	65627768	65627925	55	common
chr11	65652269	65652292	CTCCCGTCAGCGGCCACCAG	+	chr11	65652186	65652438	53	common
chr11	65652291	65652314	GGAGCAGCAGTGCCACCTGC	+	chr11	65652186	65652438	53	common
chr11	65656052	65656075	GGAGCGGCGAGGGAAGAGAG	+	chr11	65655916	65656187	54	common
chr11	65990245	65990268	GAAAGGGCAGGTGCCTGTCC	+	chr11	65990209	65990458	54	common
chr11	65990351	65990373	GTGGGGCGCTGTCCTAAGC	-	chr11	65990209	65990458	54	common
chr11	66197598	66197621	CTCCGCATGGGTCGACGGCC	-	chr11	66197544	66197745	55	common
chr11	66346586	66346609	GGACTGGATTCTGAGGGTGC	+	chr11	66346522	66346719	55	common
chr11	66650801	66650824	ACACTGCCCCCTGGCGCACG	+	chr11	66650736	66650939	54	common
chr11	67030252	67030275	TGAGGGGTGCAGCAGTGACC	+	chr11	67030217	67030424	55	common
chr11	67030307	67030330	GATATCTTCCGCCCACAAGG	+	chr11	67030217	67030424	55	common
chr11	67118741	67118764	GCACCGCTTAGCAAGGCAGG	+	chr11	67118732	67118936	55	common
chr11	67124504	67124527	GCTGGGCAAAGTCTGACACC	-	chr11	67124394	67124583	55	common
chr11	6732934	6732958	GGCTTCTGCTATGCCCAGACA	+	chr11	6732867	6733009	42	common
chr1	16735713	16735736	CCGGATGTTGCCCTGGGTCG	-	chr1	16735538	16735771	2	cell-type specific
chr11	67427009	67427031	GCCTAGACCAAGGTCCGCT	+	chr11	67427003	67427210	55	common
chr11	67427027	67427050	TAGGTAATGGATGCCTTCCC	+	chr11	67427003	67427210	55	common
chr1	16767122	16767144	CACAAACGAGGCGGTGCTG	+	chr1	16766987	16767307	55	common
chr1	16767170	16767193	AGCGGTGCGACTCTCTGACC	-	chr1	16766987	16767307	55	common
chr11	68611525	68611547	TGGCACCTAGGCGGCGCGC	-	chr11	68611500	68611635	46	common
chr11	68811791	68811814	GGCACGGACAGATGGCATCT	-	chr11	68811756	68811963	54	common
chr11	68811814	68811836	GTTCCTGGCACAGCCAGAA	-	chr11	68811756	68811963	54	common
chr1	16918479	16918502	TGGCCCTTGGTCCAGCGAGA	-	chr1	16918330	16918548	47	common
chr1	16939953	16939976	CCGCGCTCGCTCAGAAGCTC	+	chr1	16939857	16939994	5	cell-type specific
chr1	16947639	16947662	GCTTCACCATAGCTCATGCC	+	chr1	16947582	16947810	54	common
chr1	16947714	16947736	TAACCACCACCCAAGGCCA	+	chr1	16947582	16947810	54	common
chr1	16947714	16947737	TAACCACCACCCAAGGCCAT	+	chr1	16947582	16947810	54	common
chr1	16947717	16947740	GTCCCCATGGCCTTGGGTGG	-	chr1	16947582	16947810	54	common
chr1	16947723	16947746	CCCAAGGCCATGGGGACTGC	+	chr1	16947582	16947810	54	common
chr1	16947724	16947747	CCAAGGCCATGGGGACTGCA	+	chr1	16947582	16947810	54	common
chr1	16947780	16947803	GCTTCCTCTGACAGAGGTGC	-	chr1	16947582	16947810	54	common
chr1	16951548	16951571	CCCAAATGCAGCTGCTCAGC	+	chr1	16951466	16951727	53	common
chr1	16951571	16951594	GGGTGCAAGTCTCCACCTTG	-	chr1	16951466	16951727	53	common
chr1	16951591	16951614	GGTAGGGAGTGCAGGAAGCA	-	chr1	16951466	16951727	53	common
chr1	16951592	16951614	GGTAGGGAGTGCAGGAAGC	-	chr1	16951466	16951727	53	common
chr1	16951608	16951630	TGCCTCTAGAGGATGGGGT	-	chr1	16951466	16951727	53	common
chr1	16951608	16951631	GTGCCTCTAGAGGATGGGGT	-	chr1	16951466	16951727	53	common
chr1	16951612	16951635	GGAGGTGCCTCTAGAGGATG	-	chr1	16951466	16951727	53	common
chr1	16951613	16951635	GGAGGTGCCTCTAGAGGAT	-	chr1	16951466	16951727	53	common
chr1	16951613	16951636	GGGAGGTGCCTCTAGAGGAT	-	chr1	16951466	16951727	53	common
chr1	16951614	16951637	TGGGAGGTGCCTCTAGAGGA	-	chr1	16951466	16951727	53	common
chr1	16951618	16951641	TTTCTGGGAGGTGCCTCTAG	-	chr1	16951466	16951727	53	common
chr1	16951624	16951647	GAGGCACCTCCCAGAAACCC	+	chr1	16951466	16951727	53	common
chr1	16951651	16951674	CCTTCATGCAAGGTCCATCC	-	chr1	16951466	16951727	53	common
chr1	16970815	16970838	CAGCAACTGACACCCGGAGT	-	chr1	16970544	16970852	0	cell-type specific
chr1	16970980	16971003	CGCCTGGCCCCAAGCTCCAG	+	chr1	16970959	16971468	35	common
chr1	16970988	16971010	GGCAGGTCCTCTGGAGCTT	-	chr1	16970959	16971468	35	common
chr1	16971130	16971152	CCGAGGCTCGGGGTGAGTG	-	chr1	16970959	16971468	35	common
chr1	16971140	16971162	GTCGCGGCGGCCGAGGCTC	-	chr1	16970959	16971468	35	common
chr1	16971187	16971210	CTCGGCTACGGCGTCCGTTC	+	chr1	16970959	16971468	35	common
chr1	16971289	16971312	CCGGTGGGAAGCCACGGAGG	-	chr1	16970959	16971468	35	common
chr1	16971350	16971373	CCGGGGCAGGCGGAGGTCGG	-	chr1	16970959	16971468	35	common
chr1	16971357	16971380	AGCATCCCCGGGGCAGGCGG	-	chr1	16970959	16971468	35	common
chr1	16971438	16971461	CGGGGCCTCCAAGTATGGGT	-	chr1	16970959	16971468	35	common
chr1	17029849	17029872	GTGGATGGACGCCCATGCTC	+	chr1	17029744	17029936	55	common
chr1	17036348	17036370	CCTTGCTCTGCCAGCCCAG	+	chr1	17036314	17036568	55	common
chr1	17036412	17036435	TGTTGGGTGTGAACAGCCCA	+	chr1	17036314	17036568	55	common
chr1	17038756	17038779	GGTCCTCCCAGGCACAGGGA	-	chr1	17038724	17038880	8	cell-type specific
chr11	70661172	70661194	CAGCCAGCTCCGCCCCTGG	-	chr11	70661068	70661266	55	common
chr1	17077145	17077168	CTTTAACCTCTCTGCCACCC	+	chr1	17077108	17077263	0	cell-type specific
chr1	17077146	17077168	TTTAACCTCTCTGCCACCC	+	chr1	17077108	17077263	0	cell-type specific
chr1	17077151	17077174	CTGCGTCCTGGGTGGCAGAG	-	chr1	17077108	17077263	0	cell-type specific
chr11	71054863	71054886	CTGCAGAACCCGAGGAGGGC	-	chr11	71054703	71054921	53	common
chr11	71524890	71524913	CTGGAGACCCGGCCCGCCGA	+	chr11	71524872	71525047	51	common
chr1	171624811	171624833	GGCACGATGGAGGCAGCAG	+	chr1	171624733	171624893	53	common
chr1	1720654	1720677	GCTCAGACGACGCCACCTGC	-	chr1	1720565	1720757	51	common
chr11	72145294	72145318	GGCAGCCACCGGGGGGCGCCA	-	chr11	72145195	72145471	55	common
chr1	172419171	172419194	GTGAGAGGCCATTCTCCAGC	+	chr1	172419118	172419345	55	common
chr11	72560108	72560131	GCTACACAGGGATGTGGCGG	+	chr11	72560024	72560197	55	common
chr1	17278313	17278335	CCAAGGCCAGGGGTACTGC	-	chr1	17278187	17278456	54	common
chr1	17278313	17278336	CCCAAGGCCAGGGGTACTGC	-	chr1	17278187	17278456	54	common
chr1	17278322	17278345	TAACAACCACCCAAGGCCAG	-	chr1	17278187	17278456	54	common
chr1	17278323	17278346	GTAACAACCACCCAAGGCCA	-	chr1	17278187	17278456	54	common
chr1	17278340	17278363	TGTTACCACGCTTCTCCAGG	+	chr1	17278187	17278456	54	common
chr11	72896397	72896419	GAAAGGCAGGGCTGGGCAG	-	chr11	72896322	72896537	54	common
chr11	72896451	72896474	GTCCAGAGGCAGCTGTGGAA	-	chr11	72896322	72896537	54	common
chr11	72953764	72953787	GTCCACTCTGTGCTCTGCCC	+	chr11	72953408	72953963	55	common
chr11	72953845	72953868	CCAAAGCTGGCAGCAGTGGC	+	chr11	72953408	72953963	55	common
chr11	73104843	73104865	CCCTGATCCTGGGGAAGAG	-	chr11	73104712	73104908	55	common
chr1	17313712	17313735	TGATGACCAGGTCGATGGCC	+	chr1	17313526	17313779	52	common
chr11	73336876	73336899	ACTCAAGCCAGGCACCCAGC	-	chr11	73336790	73337022	55	common
chr11	73441037	73441060	GGGCCACATGGGGAAGCACT	-	chr11	73440960	73441094	50	common
chr1	173684654	173684677	GTTCAAGCTCCCTGGACTGT	+	chr1	173684380	173684758	20	cell-type specific
chr11	74437707	74437730	CCTGGAACAGGTGCAACAGC	+	chr11	74437694	74437900	54	common
chr1	17452393	17452416	GAACACGCGAAGGCCGCAAG	+	chr1	17452314	17452517	55	common
chr11	74851670	74851693	GAGGCCATGGAGCTCAGGGT	+	chr11	74851679	74851843	55	common
chr11	74851743	74851766	CCACCATCCTCGCTGCCACC	+	chr11	74851679	74851843	55	common
chr11	74855571	74855595	TGTCCAGAGGCTGAACTGGGT	-	chr11	74855589	74855772	55	common
chr11	74916216	74916239	GACGGAGCTGGCCTCAGGAG	+	chr11	74916094	74916273	55	common
chr11	75136729	75136752	TTGGTCCTGAAACTGGGTTG	-	chr11	75136678	75136858	42	common
chr1	17563785	17563808	CTGGCCAGGAGGGAGAGGGC	-	chr1	17563632	17563861	55	common
chr1	17563796	17563819	GCCCACCGGACCTGGCCAGG	-	chr1	17563632	17563861	55	common
chr1	17563847	17563870	CCTGAAGGCACAGCAGGTGC	+	chr1	17563632	17563861	55	common
chr1	175726744	175726766	CCCAAGGCTCCTGCAGCAT	+	chr1	175726618	175726817	55	common
chr1	175726753	175726776	CCCCATCTCGCCCATGCTGC	-	chr1	175726618	175726817	55	common
chr1	17600820	17600843	GATGGAGTGGCCATGGCCTC	+	chr1	17600764	17601026	55	common
chr1	17600836	17600859	CCTCAGGCTCCATGTCCGAT	+	chr1	17600764	17601026	55	common
chr1	17600845	17600868	CCATGTCCGATGGGGAGTGC	+	chr1	17600764	17601026	55	common
chr11	76030002	76030025	GCGCCACCTACTGTCCATGT	+	chr11	76029955	76030136	54	common
chr11	765461	765484	GTCATGGTGCCACCTTGTGG	+	chr11	765377	765583	55	common
chr11	765470	765493	GTCGTGCTGCCCCCACAAGG	-	chr11	765377	765583	55	common
chr11	76549920	76549943	TGGCTCCATCCAGCGGGCAG	+	chr11	76549838	76550015	31	cell-type specific
chr11	76572339	76572361	GGGGGCCTGAGGATTGGGG	+	chr11	76572130	76572555	32	cell-type specific
chr11	76742278	76742301	CGGCAGCAGCCCTGACTCTT	-	chr11	76742212	76742358	6	cell-type specific
chr11	76903238	76903260	GGCCACGTTGTCCTCGGAG	-	chr11	76903143	76903333	52	common
chr1	17746438	17746461	GAGGCTAAGGCCAGCGGGCT	+	chr1	17746328	17746631	55	common
chr1	178006689	178006712	GTGGAGGGCAACTTCGTCCT	-	chr1	178006605	178006873	19	cell-type specific
chr1	17811978	17811999	GGTAGCAGGGAGGTGGGT	+	chr1	17811892	17812078	54	common
chr1	17820827	17820850	TGCCAGGCAAGGCCCAGAGG	+	chr1	17820813	17821030	55	common
chr1	17820986	17821009	CAGCCAACCTCCTTGTCCTC	+	chr1	17820813	17821030	55	common
chr1	17828954	17828977	GAGCAGCACCTCCAGGACTG	-	chr1	17828807	17829112	55	common
chr1	17828973	17828995	GCTCAGTGCACGACGCCAG	+	chr1	17828807	17829112	55	common
chr1	178331120	178331143	GATGCCACCACTGATCTAAC	+	chr1	178331053	178331239	31	cell-type specific
chr1	178331127	178331150	GCCACCTCCTGTTAGATCAG	-	chr1	178331053	178331239	31	cell-type specific
chr11	78356418	78356441	CTGCAGTGTGCACAGTTGGC	+	chr11	78356359	78356540	53	common
chr1	178470984	178471007	AGCAGCTGGGGCAGGTCACT	+	chr1	178470961	178471169	55	common
chr1	178972046	178972069	GTTTGGCCAAAGGACCGTGC	-	chr1	178971919	178972163	55	common
chr1	17899305	17899328	GAGGAGGTGAGCCTGACCCC	+	chr1	17899252	17899440	40	common
chr1	17899316	17899339	CCTCCTCACCTCCAGGGGTC	-	chr1	17899252	17899440	40	common
chr1	17899321	17899343	TCACCCTCCTCACCTCCAG	-	chr1	17899252	17899440	40	common
chr1	17899385	17899408	GGCTGAACTAAAGCCTCCAG	-	chr1	17899252	17899440	40	common
chr1	17901270	17901293	GGCATCTTGCTGCCCTGCGT	+	chr1	17901148	17901319	25	cell-type specific
chr1	17901272	17901295	CATCTTGCTGCCCTGCGTGG	+	chr1	17901148	17901319	25	cell-type specific
chr1	17933499	17933522	GCGCAGCTGGCCCAGAGTCC	-	chr1	17933436	17933655	55	common
chr1	17933549	17933572	GTGAAGTCAGATTTGGGGTG	+	chr1	17933436	17933655	55	common
chr1	17956075	17956096	GGGGAAGACGAGATGGGG	+	chr1	17956043	17956232	44	common
chr1	17956171	17956195	GTTAGTCCTGCCTGGAACCAG	-	chr1	17956043	17956232	44	common
chr1	17988199	17988222	CTGGAAGCTGGAGTCTAATT	-	chr1	17988124	17988370	55	common
chr11	81369974	81369997	CTGGCTGTGAGTGCTGGCTG	+	chr11	81369866	81370000	52	common
chr1	18152877	18152900	CTCCCAGACTGTGGCCTTGG	-	chr1	18152650	18152890	54	common
chr1	18311207	18311230	AGGGAATGCTCCAGTGACGG	+	chr1	18311116	18311264	55	common
chr1	1837761	1837784	GCCTAACACGCTGACCAGTG	+	chr1	1837761	1837936	55	common
chr1	1837780	1837803	GGGGTCAGCTCACCAAGGGC	+	chr1	1837761	1837936	55	common
chr1	1837867	1837890	GAGAACGTCCCGTAGGGCCA	+	chr1	1837761	1837936	55	common
chr1	184633207	184633230	CAGAGCTCCTCTCCTCCGGG	+	chr1	184633183	184633394	49	common
chr1	184774841	184774862	CGCGGGGCCTGTAGCTGT	+	chr1	184774750	184774976	55	common
chr11	848395	848418	CCTCGCTGGGGGAAGGGGAC	-	chr11	848354	848544	55	common
chr11	85904729	85904752	CTCATACTGACTCCATGCTA	-	chr11	85904656	85904848	55	common
chr1	186344700	186344724	CGAGGACGATCCATGGCATCC	-	chr1	186344529	186344873	55	common
chr11	86808701	86808724	TGTGGCTGAAGTGGAGAATG	-	chr11	86808653	86808843	54	common
chr11	8835335	8835358	GGTTCCTTAGGGCCTTGTCC	+	chr11	8835221	8835431	55	common
chr1	18902284	18902307	CTCAGTCAGGGACCTGGTGC	-	chr1	18902154	18902344	46	common
chr1	18908023	18908046	AGGGATGTCCTGAGGGGCGC	+	chr1	18908004	18908239	55	common
chr1	18924008	18924031	TGGGGACAGCTCCCAAGGGC	+	chr1	18923963	18924197	55	common
chr11	898297	898319	GCAGCCTGAGCTCAGGCCC	+	chr11	898169	898353	44	common
chr11	898680	898703	GTCCAGTCCAGGCCAGGTGG	+	chr11	898614	898754	24	cell-type specific
chr1	19147390	19147413	GGAGGCTGAGCCGCTGCCAG	-	chr1	19147346	19147587	55	common
chr11	9159372	9159395	GAGGAAAGGGGAAGGAAGGT	-	chr11	9159348	9159562	55	common
chr1	19201818	19201841	GGGGACACGGACAGGACACC	+	chr1	19201801	19202021	55	common
chr1	19201850	19201873	GAGTGGCCAGGCCGCAGCCC	-	chr1	19201801	19202021	55	common
chr1	19210792	19210814	CCAGCTCTGTGCAGCAGAG	+	chr1	19210694	19210915	55	common
chr1	19210813	19210836	GGCGCTCACCATGGGGACCG	+	chr1	19210694	19210915	55	common
chr1	19233544	19233566	CTGCCTCCAGGCAAGGCAG	+	chr1	19233500	19233869	55	common
chr1	19233647	19233669	GCAACAGACCCACTGCAGT	+	chr1	19233500	19233869	55	common
chr1	19239771	19239794	CCGAGTCCAGGGTCCTGAGC	+	chr1	19239594	19239859	55	common
chr1	19239782	19239805	GTCCTGAGCTGGTAGGGGGT	+	chr1	19239594	19239859	55	common
chr1	195314500	195314523	CTCAGCTACTCAGGAGGGAG	-	chr1	195314371	195314542	20	cell-type specific
chr1	19559128	19559151	TCCCCCACAGTGCACCCTGC	-	chr1	19559050	19559246	24	cell-type specific
chr1	19559133	19559154	AGGGTGCACTGTGGGGGA	+	chr1	19559050	19559246	24	cell-type specific
chr11	95974646	95974669	GGGGTCTACTGGCACCTAGT	+	chr11	95974554	95974744	31	cell-type specific
chr11	95974666	95974688	GGGTAGAGGCCAGAGATGC	+	chr11	95974554	95974744	31	cell-type specific
chr11	9634893	9634916	GGGGACACCAGCTGCCTGCA	-	chr11	9634810	9635004	55	common
chr1	19668149	19668171	GTTCCCTGGCCGCCCACTG	-	chr1	19668062	19668262	55	common
chr1	19670978	19671001	GGCAGGTGGAGGGAGGGCGT	-	chr1	19670913	19671119	55	common
chr1	19670984	19671005	GGCTGGCAGGTGGAGGGA	-	chr1	19670913	19671119	55	common
chr1	19670984	19671007	AGGGCTGGCAGGTGGAGGGA	-	chr1	19670913	19671119	55	common
chr1	19671087	19671110	CCGGGAGCACAGATGGCAGG	-	chr1	19670913	19671119	55	common
chr1	19713831	19713854	GCAGGGCTGGGGCTAGGAGA	-	chr1	19713750	19713921	6	cell-type specific
chr1	1976486	1976509	CTGGCCTCGGGGAGCTGCGC	-	chr1	1976360	1976524	54	common
chr1	1978109	1978132	GGAGGTGCTAGGTGACCGCT	-	chr1	1977984	1978193	55	common
chr1	198025586	198025609	GTGCAGGTACTGGCTATGGT	+	chr1	198025480	198025666	47	common
chr1	198025592	198025615	GTACTGGCTATGGTAGGCAG	+	chr1	198025480	198025666	47	common
chr1	19977932	19977955	TCAGCGTCAGGCTGGGACAG	-	chr1	19977801	19977958	55	common
chr1	19986384	19986407	GCCGTGGGGTTGGAGAGGCA	+	chr1	19986401	19986560	55	common
chr1	19986533	19986556	AGTCCCTCCTCACTGCGGGG	-	chr1	19986401	19986560	55	common
chr1	20031245	20031268	CTGTCCGTGGATCCTGACTG	-	chr1	20031093	20031332	55	common
chr1	20042271	20042294	GTCACCACAGCACCACCTGG	-	chr1	20042173	20042391	55	common
chr1	20042286	20042309	GTGGTGACCATGTAAGCCCC	+	chr1	20042173	20042391	55	common
chr1	20042303	20042326	GTTCTGCCAGGGAGATGCCC	-	chr1	20042173	20042391	55	common
chr1	20042314	20042337	CTTGGGGTAGGGTTCTGCCA	-	chr1	20042173	20042391	55	common
chr1	20042368	20042391	GGAGGGAGCGCCCTGGGAGT	+	chr1	20042173	20042391	55	common
chr1	201012190	201012213	GCCAATACTGACATGATGTG	+	chr1	201012118	201012345	55	common
chr1	201223858	201223882	CGCAAAGCCTGTGGTGCCACC	-	chr1	201223766	201223953	55	common
chr1	201354535	201354557	GTGGACCTCCCTGCAGCCC	+	chr1	201354490	201354704	54	common
chr1	201377556	201377579	GGCCTCCTGCCCTGTGCAGC	+	chr1	201377402	201377625	54	common
chr1	201377566	201377589	CTCACCTAGTCCTGCTGCAC	-	chr1	201377402	201377625	54	common
chr1	201451360	201451383	CTGCCCTCTGCTGGCTGATC	-	chr1	201451241	201451467	55	common
chr1	201865284	201865307	CCTCTTCCTCGGTGCTCCCG	-	chr1	201865066	201865301	54	common
chr1	20208793	20208816	GAGCAGACGCCATAGAGAGC	-	chr1	20208668	20208896	55	common
chr1	202206350	202206373	GCTGGATGGAGGGAGAGGAG	-	chr1	202206356	202206510	54	common
chr1	202243966	202243989	CATCATGTCAAGTTTGATGT	+	chr1	202243852	202244026	53	common
chr1	202594791	202594814	CGGCTGTGTGCGGAGGGCGT	-	chr1	202594634	202594847	55	common
chr1	202896075	202896097	GAGGAGGAAGGCTGGCAGT	-	chr1	202895911	202896153	55	common
chr1	20301309	20301331	CTGGCCACCAGCTGGACCC	-	chr1	20301320	20301577	54	common
chr1	20301435	20301458	CTGGCCTGCTGGGAGAAAGC	-	chr1	20301320	20301577	54	common
chr1	203457118	203457141	CCTGGGGTGATTTTCCTCGG	+	chr1	203457001	203457157	55	common
chr1	203830622	203830645	CTTCGCTGCATGGCCTCCGA	-	chr1	203830527	203830661	55	common
chr1	204096964	204096987	CCTGCAGGAGCTTCAGGCCT	+	chr1	204096884	204097057	54	common
chr1	204098312	204098333	GGGAGGAGGAGCTGGCGG	+	chr1	204098253	204098457	55	common
chr1	204415099	204415122	CATGAACCACCAGGATGCCC	-	chr1	204415071	204415283	49	common
chr1	204415747	204415770	GAAAGCCGACAGCTGGTCCC	-	chr1	204415608	204415771	55	common
chr1	204498519	204498542	TGGGCACCGTAGGAATTTGG	+	chr1	204498530	204498720	30	cell-type specific
chr1	204776546	204776569	CAGCAGGGGGCTGGCAGTGC	-	chr1	204776191	204776644	55	common
chr1	20479032	20479055	GGAGGGGTGCAGTGGAGCAC	-	chr1	20478917	20479149	55	common
chr1	20479049	20479071	CCAGGGCAGAGGGGCGGGA	-	chr1	20478917	20479149	55	common
chr1	20479050	20479073	GTCCAGGGCAGAGGGGCGGG	-	chr1	20478917	20479149	55	common
chr1	204944980	204945003	AAAGCATGCCAGGTTCAGTC	-	chr1	204944840	204945062	55	common
chr1	204958546	204958569	GCCAGATGACGCCTGGACCC	-	chr1	204958496	204958714	54	common
chr1	204958633	204958656	CCTGATGCCAGTGCGTGTGC	-	chr1	204958496	204958714	54	common
chr1	205091501	205091524	TAGCGCCGCTGACCTCACCA	+	chr1	205091394	205091601	55	common
chr1	205400106	205400129	GATGGGAGAGCGCCGTCTGC	+	chr1	205400032	205400169	54	common
chr1	205561072	205561095	GGACCGTTCTGACATCTGGA	-	chr1	205561018	205561233	55	common
chr1	20688451	20688474	CTGAACGGTATCAGAACAGC	-	chr1	20688360	20688580	55	common
chr1	20703476	20703498	CTTGCTCCCAGCCCTGCCC	+	chr1	20703479	20703686	55	common
chr1	207134534	207134555	GCTGGAGTGGCTGTGGGG	+	chr1	207134444	207134599	6	cell-type specific
chr1	20757108	20757131	AAGAGTCTGTGGGGAGGGCA	+	chr1	20757020	20757202	55	common
chr1	20959893	20959916	CCCGCGGCAGTTCCCCGACT	-	chr1	20959782	20959985	55	common
chr1	20987943	20987966	GATCGGGATACGCCGCGGCT	+	chr1	20987922	20988085	44	common
chr1	209921204	209921225	TGCAGGTGGTGGCCGCCC	-	chr1	209921033	209921470	54	common
chr1	21023016	21023038	ATGGGGGTGCCTTCTGCCC	-	chr1	21022906	21023270	55	common
chr1	21023031	21023054	CCCTGGAGTGCCACGGATGG	-	chr1	21022906	21023270	55	common
chr1	21023080	21023103	GCCTCCCCCTGGTGGTCACC	-	chr1	21022906	21023270	55	common
chr1	21023108	21023130	CCTACTTACTGGACAGCGG	+	chr1	21022906	21023270	55	common
chr1	21023191	21023213	CTGGTCACAGATGGAGGGG	-	chr1	21022906	21023270	55	common
chr1	21023410	21023433	CGGGCTGGAAACGGCAGTGG	+	chr1	21023382	21023607	52	common
chr1	21029098	21029120	GCCCAAGGCAGCCAGCAGA	+	chr1	21029023	21029202	43	common
chr12	104026539	104026562	AGGGCGCTGGCGGGACACGG	-	chr12	104026448	104026680	54	common
chr1	2105884	2105907	GCTGTCTCCGCGGTGCCCTC	+	chr1	2105819	2106001	55	common
chr12	1059073	1059096	TGGCGGGAAGTAGGAGGCAG	-	chr12	1059038	1059240	55	common
chr12	106676311	106676334	AGCTCGGTTGCAGGCTGCTG	-	chr12	106676285	106676427	55	common
chr12	107711718	107711741	GTGCGGCCCTCTTTCAGCCG	-	chr12	107711550	107711731	21	cell-type specific
chr12	108888931	108888954	CCTGGAGGCTGTCTTGGGCT	+	chr12	108888863	108889002	54	common
chr12	109871739	109871762	CCCGACCCCAGGCCTGGTGA	-	chr12	109871638	109871797	41	common
chr12	110177781	110177803	GCCCACGGGCCAGTGGGAG	-	chr12	110177726	110177920	42	common
chr12	110283216	110283237	GTGGGGAGGCGCAGGGCC	+	chr12	110283159	110283410	55	common
chr12	111375072	111375095	GCCGTGGCTGCGCGGAGCCG	-	chr12	111374968	111375146	55	common
chr12	111462106	111462129	TGGGACCTGAATGAGGGCTC	-	chr12	111462043	111462274	55	common
chr12	111736875	111736898	GGGCACTCAAGACTCCGGGC	-	chr12	111736722	111736994	55	common
chr12	111751786	111751809	CGGCTCCTGGCGGCAACTGG	-	chr12	111751663	111751876	55	common
chr12	112226239	112226262	CCCAGATGTCAGCAGTGCCA	+	chr12	112226060	112226257	49	common
chr12	112451305	112451329	GCCCAGGAGAAGGGGAAGCAG	-	chr12	112451213	112451356	51	common
chr12	112608356	112608379	CCGGCTCTACTGCCACCAGG	-	chr12	112608284	112608435	53	common
chr12	113568650	113568673	CGGGGGAGAGGAGGAAGGGA	-	chr12	113568609	113568743	42	common
chr12	113568706	113568729	GTCCACTTTCACTAGGCAGT	+	chr12	113568609	113568743	42	common
chr12	113591246	113591267	CCACTCAGCGCCACGCGG	-	chr12	113591180	113591361	51	common
chr12	113612319	113612342	ACCATCTTGAGCCCAGGCCC	+	chr12	113612277	113612484	55	common
chr12	113612443	113612466	CCACGCCGAGTACCTCACTG	-	chr12	113612277	113612484	55	common
chr12	113750455	113750478	GCCAGAACCAGTCTTTCCCC	+	chr12	113750383	113750592	55	common
chr12	11381238	11381261	CTGTTACTTCACCATTTGTG	+	chr12	11381246	11381453	54	common
chr1	211526417	211526440	TGACAACCTCCTGCCACTAG	-	chr1	211526294	211526481	55	common
chr12	115296337	115296360	TATTGCTCAACTCCAGGTGT	+	chr12	115296298	115296499	23	cell-type specific
chr12	116355068	116355090	CTCGGCTTCGCGCGGGGCT	+	chr12	116355072	116355429	55	common
chr12	116355208	116355231	GCTGAATGGAAGCAGGTGGT	-	chr12	116355072	116355429	55	common
chr12	116421200	116421223	GGATCAGCAGCTCCCCCAGC	-	chr12	116421119	116421301	49	common
chr1	211687548	211687571	CGGCATCATCCTGGACGCGC	-	chr1	211687424	211687614	54	common
chr1	211751176	211751198	GCGGGGCGTGTGCAGGACG	+	chr1	211751038	211751545	55	common
chr12	117593126	117593147	CTCAGGTGCTCCCAGGGC	+	chr12	117593057	117593310	55	common
chr12	118025739	118025762	GGAGCATTGATGCAGGGATA	-	chr12	118025581	118025764	55	common
chr12	118275244	118275267	GCGCCATCAAGAGGTGGCCC	+	chr12	118275121	118275359	54	common
chr1	211871981	211872004	CTGCCATGCTGCCTGTAACC	+	chr1	211871895	211872114	55	common
chr1	211872014	211872036	CTCTCCCTCCTGGAGCTGA	+	chr1	211871895	211872114	55	common
chr1	211872043	211872064	GTCCAGGTAGGTGAGCGG	-	chr1	211871895	211872114	55	common
chr12	118814009	118814032	GTTAGCGACCTAGGGGCGGA	-	chr12	118813977	118814156	54	common
chr12	119151854	119151877	GACGTGTCCAGGACATTGCC	+	chr12	119151833	119152034	49	common
chr12	119673314	119673337	GCCTCCTGCTGGCAGGCATG	-	chr12	119673241	119673375	29	cell-type specific
chr12	120340030	120340053	GCCCAATAGAGTAGCTGCAG	+	chr12	120339920	120340110	55	common
chr12	120740047	120740070	TGCGAGACGCGGAGGATTGT	+	chr12	120739927	120740118	55	common
chr1	212118201	212118224	GTTCAGCACGGATCTAAACC	-	chr1	212118124	212118379	35	common
chr12	121534023	121534046	CTGGGCTCTTCTGCTGACGT	-	chr12	121533814	121534050	55	common
chr12	121881163	121881186	CAGCAGGAATGGCTAGAGCT	+	chr12	121881106	121881298	55	common
chr12	121990770	121990793	CCCACGTATTCCAGGCACCT	-	chr12	121990581	121990791	55	common
chr12	122492455	122492478	CACTTAGCTGCTGAGGGCCC	-	chr12	122492294	122492528	55	common
chr12	122675612	122675635	GTTCATGCCGCAAGGTGCAC	+	chr12	122675528	122675701	55	common
chr12	122685507	122685530	GGGGAGGGCGAAGGCAGAGG	-	chr12	122685343	122685528	13	cell-type specific
chr12	122791122	122791145	GCCCCTTTGTGGTCAGGTGC	-	chr12	122791040	122791223	34	common
chr12	123352376	123352399	TCTGCCTGTCACGCTGGTGG	-	chr12	123352219	123352438	37	common
chr12	123749302	123749325	GGAGACCCAAGGAAGTGTGT	-	chr12	123749273	123749445	40	common
chr12	123749369	123749392	GTCCTAGGGAAGCCAAGCTC	-	chr12	123749273	123749445	40	common
chr12	124423442	124423465	CCAAGGCCGGCTGGAGGAGC	-	chr12	124423368	124423613	45	common
chr12	124805562	124805585	TGGGCCTCACCGATGTGAGT	+	chr12	124805583	124805793	55	common
chr12	125235555	125235578	CGCAATGCTCTGGAGGTGAG	-	chr12	125235475	125235646	37	common
chr12	125235556	125235579	CCGCAATGCTCTGGAGGTGA	-	chr12	125235475	125235646	37	common
chr12	125256560	125256583	ATTCCGAGCTCGGCCACTGG	-	chr12	125256476	125256667	55	common
chr12	125383079	125383100	GGAGGGGTGCGGAGATGG	+	chr12	125383038	125383280	55	common
chr12	125425365	125425387	CCCACGTCCACCCACGCCC	-	chr12	125425261	125425516	55	common
chr12	125721782	125721805	TGCCCCCTGGAGGTCACCTG	-	chr12	125721705	125721909	54	common
chr1	2126747	2126770	GGCTTTCCTGCCTGGACCCC	+	chr1	2126647	2126894	55	common
chr12	129677990	129678013	GTGGCAGCAGCCCAAATTGC	-	chr12	129677914	129678092	54	common
chr12	130516224	130516247	CCACACCTCTGTCCACCTCC	+	chr12	130516218	130516444	55	common
chr12	131617190	131617213	GCGCAGGCCTCCGTCTCAGC	-	chr12	131617061	131617279	53	common
chr12	131939463	131939486	CTGGGAGCTGCTGCATGGCC	-	chr12	131939338	131939548	48	common
chr12	132638443	132638466	CCGTCCTCTTGCTGTGTCCC	+	chr12	132638443	132638683	55	common
chr12	132638526	132638549	CCTGGGGCAGGGCTGGGCCT	+	chr12	132638443	132638683	55	common
chr12	133004732	133004755	CAAGGACTGAGCACCAGCAG	+	chr12	133004640	133004884	15	cell-type specific
chr12	133177171	133177194	GGAACAGCCAGGCAGAGGCC	+	chr12	133177060	133177287	52	common
chr12	14017188	14017211	CTCTGCCTGCTGCCGACAGG	+	chr12	14017094	14017319	55	common
chr1	21543540	21543563	GGGGGTGCTCACACACTTGT	+	chr1	21543418	21543636	55	common
chr1	21661326	21661349	CGTCTGTCCTGAGGCTGAGG	-	chr1	21661250	21661532	53	common
chr1	21661354	21661377	GAGGCAGGAGCGCGGGCCTC	-	chr1	21661250	21661532	53	common
chr1	21661361	21661384	CAGGAGGGAGGCAGGAGCGC	-	chr1	21661250	21661532	53	common
chr1	21661439	21661462	GCCCAGTCGCCCCTCAACGT	+	chr1	21661250	21661532	53	common
chr1	21695080	21695103	CCCACGGTCTGTGATTCTGG	+	chr1	21695056	21695275	54	common
chr1	21695111	21695134	GCCCAAGCTGGGCTGGCAGG	+	chr1	21695056	21695275	54	common
chr1	21697176	21697199	CTCGACAGTTGTCCAGGCGC	-	chr1	21697138	21697298	54	common
chr1	21795209	21795232	GTCAGCATGGTGGTATCTGC	+	chr1	21795216	21795362	43	common
chr1	21835660	21835683	GAGAGACCGAGAGTGCGGGG	+	chr1	21835640	21835821	49	common
chr12	1909905	1909928	GGTGATCAAGCGGCAGTGTC	+	chr12	1909888	1910022	47	common
chr12	21590730	21590753	GTCACTTGTGCGGAGCAGGT	+	chr12	21590603	21590752	40	common
chr1	22290703	22290726	GCCAGGGCAGCACCTTCCTA	-	chr1	22290552	22290775	55	common
chr1	22290704	22290727	AGCCAGGGCAGCACCTTCCT	-	chr1	22290552	22290775	55	common
chr1	223858324	223858347	CTCAGTCAAGGCCAGTTGGG	+	chr1	223858285	223858454	51	common
chr1	223884309	223884332	GTTTGCCCAGTGTCCAGCAG	-	chr1	223884193	223884428	54	common
chr1	2243076	2243098	CTGCCTCCAGCAGCCACGT	+	chr1	2243020	2243154	45	common
chr1	22458505	22458528	CCTGCCTGTGCCCAGCCAAG	+	chr1	22458412	22458786	55	common
chr1	22458584	22458607	CCGGCTACTGGCTGTGGGCC	+	chr1	22458412	22458786	55	common
chr1	22458603	22458626	CAGGTCCACGTTCAGGCCAC	+	chr1	22458412	22458786	55	common
chr1	2246805	2246828	TGGGACCTTCCGGGAGGGCA	-	chr1	2246672	2246866	53	common
chr1	224701602	224701625	CAAACCCGCACGTTTCTGCC	+	chr1	224701506	224701714	55	common
chr1	226284240	226284263	CCCAGCTGTGGTCCCCCTGG	+	chr1	226284170	226284307	0	cell-type specific
chr1	226384757	226384780	GCAAGAAGACGTGAAAGGTT	+	chr1	226384772	226384971	54	common
chr1	22643916	22643939	CCTGGCTGGGCCCCTAGTCC	-	chr1	22643862	22644084	53	common
chr1	226521301	226521324	GCCGCTTCTCAGCCTGATGG	-	chr1	226521247	226521434	55	common
chr1	226521334	226521357	GATGAATGCGGTGGTGTCGC	-	chr1	226521247	226521434	55	common
chr1	226756290	226756312	GTGGGTGGCCAGGAGGAGA	+	chr1	226756255	226756460	39	common
chr12	26920232	26920255	CCTGCCTCTGCTCCCTCCAG	+	chr12	26920192	26920334	12	cell-type specific
chr12	27006866	27006889	GCTCCACCTGCTGGATGGCC	-	chr12	27006803	27006980	55	common
chr1	22747104	22747127	GCCATCTCGTGCCAGCATCA	-	chr1	22747019	22747183	55	common
chr12	27974375	27974398	CGTGGCCCCTGTGGTTAGGT	-	chr12	27974242	27974385	55	common
chr1	229797180	229797203	GTCCTGGTGGTGGCACTGCA	+	chr1	229797076	229797283	55	common
chr1	22992420	22992443	CCAGGCTTGCTGCCACCAGG	+	chr1	22992378	22992512	46	common
chr1	23000803	23000826	TGGGGTACACTGCCACCAGG	+	chr1	23000715	23000900	55	common
chr1	230404845	230404867	CCCAGGATGTGGCCATTGG	-	chr1	230404741	230404909	48	common
chr12	3053900	3053923	GCTAAGGCTGCCACAAATGA	+	chr12	3053854	3054065	55	common
chr1	2305591	2305614	GTGGCCACATCACAGTGCAG	+	chr1	2305526	2305690	8	cell-type specific
chr1	231114845	231114866	GTGGAAATGGGCAACGGC	+	chr1	231114826	231114999	50	common
chr1	231114917	231114940	CAGGAGGCCGAGGCAGCAGT	-	chr1	231114826	231114999	50	common
chr1	2313327	2313350	GCCAGTGTGGTGCCGGGACA	+	chr1	2313277	2313469	55	common
chr1	2313364	2313387	GGTGGATGCGCTGAGCACCC	+	chr1	2313277	2313469	55	common
chr1	2313396	2313419	GGGACGGCGCCCTCCCTCCT	-	chr1	2313277	2313469	55	common
chr1	2314198	2314220	CTGGCCTGGGCTGGTGCTG	-	chr1	2314126	2314303	47	common
chr12	3182695	3182719	CTATGGCCGAATGTGAAGTGT	+	chr12	3182643	3182839	54	common
chr1	232002624	232002647	GTCTGCTCATCCTCTGCCGC	+	chr1	232002541	232002675	55	common
chr12	32552566	32552588	CGGGAAGGAGAGGGAGAGG	+	chr12	32552560	32552731	54	common
chr1	23290934	23290955	TGGGGGTCGGGTTGAGGG	-	chr1	23290790	23291010	55	common
chr1	23290935	23290957	CTTGGGGGTCGGGTTGAGG	-	chr1	23290790	23291010	55	common
chr12	32908154	32908177	CTCGGCCAAGCTCATGCCCT	+	chr12	32908089	32908352	55	common
chr12	32908156	32908179	CGGCCAAGCTCATGCCCTCG	+	chr12	32908089	32908352	55	common
chr12	32908220	32908243	TGGGGGGTCACTTCCGCATG	-	chr12	32908089	32908352	55	common
chr12	32908237	32908260	GGACTTCCTGGCGGCAGTGG	-	chr12	32908089	32908352	55	common
chr12	32908238	32908260	GGACTTCCTGGCGGCAGTG	-	chr12	32908089	32908352	55	common
chr12	32908238	32908261	TGGACTTCCTGGCGGCAGTG	-	chr12	32908089	32908352	55	common
chr12	32908238	32908262	GTGGACTTCCTGGCGGCAGTG	-	chr12	32908089	32908352	55	common
chr12	32908239	32908261	TGGACTTCCTGGCGGCAGT	-	chr12	32908089	32908352	55	common
chr12	32908239	32908262	GTGGACTTCCTGGCGGCAGT	-	chr12	32908089	32908352	55	common
chr12	32908240	32908263	GGTGGACTTCCTGGCGGCAG	-	chr12	32908089	32908352	55	common
chr1	23303178	23303201	GCCCCTGGACAAGGGCCTGG	-	chr1	23302963	23303422	55	common
chr12	3312336	3312359	GCAGGCAGTTATACCAACTC	-	chr12	3312258	3312440	55	common
chr1	233376961	233376984	GCAGCAACACCGTGGAAGTG	+	chr1	233376931	233377117	55	common
chr1	233927016	233927039	CTAACTTGTGCTCCCTCTAG	+	chr1	233926926	233927134	54	common
chr1	234458803	234458826	GCCATCATCATCATCGGCCT	+	chr1	234458825	234459013	51	common
chr1	234635021	234635042	CGGGGACAAACGCGAGGC	-	chr1	234634885	234635092	54	common
chr1	235247240	235247262	GTCAGCTCAGGTTGTCTGG	-	chr1	235247101	235247336	54	common
chr1	23543486	23543509	AGCGCCCAGGCGAGAACTGG	-	chr1	23543266	23543628	54	common
chr1	235578795	235578817	GTGACTTGGACGAGGCATC	+	chr1	235578768	235578902	55	common
chr1	236706523	236706546	GGGGAAGCAGCCAAGCAGGG	-	chr1	236706526	236706668	21	cell-type specific
chr1	236917086	236917109	GAAGAGGGAGGATAGGGAGG	-	chr1	236916952	236917133	50	common
chr1	23695590	23695613	GGCGGGGAGGCGAAAACCCT	+	chr1	23695494	23695739	34	common
chr1	23695630	23695653	GCGGTGTAGGGCGTGTAAGG	+	chr1	23695494	23695739	34	common
chr1	23730516	23730538	GTGCGGTGCGGGCACATCC	-	chr1	23730513	23730744	55	common
chr1	23730556	23730579	CCTCTACTCAGACCTGGGGC	-	chr1	23730513	23730744	55	common
chr1	238027763	238027786	CCTGACCTGCGCACGTGTCC	+	chr1	238027592	238027839	54	common
chr1	23866598	23866621	CTAGTAGCCCTGTCCTCAGC	-	chr1	23866391	23866627	55	common
chr1	23871404	23871427	GAATGGTCAACCAGTCACCT	-	chr1	23871270	23871476	55	common
chr1	239472234	239472257	CACCCCTCTGAGCCAGACAG	+	chr1	239472089	239472340	47	common
chr1	23964057	23964080	GGGGCCTGGAACGGAGACAC	+	chr1	23963970	23964228	55	common
chr1	23984395	23984417	GGGGCTCAGAAGCTCTGGG	+	chr1	23984238	23984490	55	common
chr1	24018135	24018157	TAGCCACTGCAGGCGACGC	-	chr1	24018108	24018304	55	common
chr1	24045154	24045177	CAGAAGCAGGAGCGCCCCTT	+	chr1	24045073	24045286	55	common
chr1	24136336	24136359	CACACTCTGCAGGGCCACTG	-	chr1	24136258	24136497	55	common
chr1	24136337	24136361	CCCACACTCTGCAGGGCCACT	-	chr1	24136258	24136497	55	common
chr1	24136363	24136386	GGCAGTGGCTGGCCTTTAGG	+	chr1	24136258	24136497	55	common
chr1	24136370	24136393	GCTGGCCTTTAGGGGGCAGC	+	chr1	24136258	24136497	55	common
chr1	24137478	24137501	GGACAATGGACCTACAATTG	+	chr1	24137313	24137523	55	common
chr1	24194907	24194930	GGCGCTCCTCCGACCCGAGG	-	chr1	24194824	24195102	55	common
chr1	24243487	24243510	GATGGATCTACCCCATGCTG	+	chr1	24243396	24243793	55	common
chr1	24243497	24243520	CAGCACTCGGCCCCAGCATG	-	chr1	24243396	24243793	55	common
chr1	242815186	242815209	GCCTATTCCGGGGAGGTGGC	+	chr1	242815180	242815339	36	common
chr1	24477170	24477193	GGCGACCCAGCAGTAGGAGG	+	chr1	24477018	24477224	55	common
chr1	24528559	24528582	CCCACTTCCTGGACCTCTGT	-	chr1	24528437	24528913	55	common
chr12	45342692	45342715	ATCGGGAGCACCGTTGCGGC	+	chr12	45342584	45342825	55	common
chr1	24580254	24580277	TGACAGGCTACAGAAGGCAG	+	chr1	24580187	24580344	29	cell-type specific
chr1	247134788	247134811	CTCCCGTTACTTAGCAGACC	-	chr1	247134778	247134912	51	common
chr1	24717905	24717928	CCTCAGTGGAGCTGGTGCCG	+	chr1	24717857	24718066	55	common
chr1	24719029	24719052	CGAGGCTGGACTGAGGGCAG	-	chr1	24718899	24719113	55	common
chr1	247282465	247282488	ACCGGGTGAGGATGGCATCC	-	chr1	247282271	247282503	43	common
chr1	24741969	24741992	CTCGCCTCCACCTGCCCGGC	-	chr1	24741895	24742170	55	common
chr1	24741998	24742021	CCTAAGCTCTCTGGGACAGC	+	chr1	24741895	24742170	55	common
chr1	24742012	24742035	GACAGCGGGAGAGGGGGCAG	+	chr1	24741895	24742170	55	common
chr1	247844707	247844730	CGCACTCAGATCTTGGATGC	+	chr1	247844706	247844889	55	common
chr1	2479584	2479606	GGAAGTGGCACCTGCGGCC	+	chr1	2479538	2479736	53	common
chr1	2479670	2479693	CTCTGAGCCACAGGGGCTGC	-	chr1	2479538	2479736	53	common
chr12	48136201	48136224	CTTCCCAGGGCAGGGCACAC	+	chr12	48136068	48136293	55	common
chr1	2486445	2486468	TGGGGGACATTCCTGGCAGG	+	chr1	2486392	2486580	52	common
chr12	48936287	48936310	GCGCTCCAACCAAAGGAAGC	+	chr12	48936191	48936389	55	common
chr1	24894342	24894364	CCAGGTGGGATGGGAGAGG	+	chr1	24894329	24894814	13	cell-type specific
chr1	24894361	24894384	AGGCAGGAGAGAGGTGGCGG	+	chr1	24894329	24894814	13	cell-type specific
chr1	249120825	249120848	TAACAAACTCCTGCTCATCG	-	chr1	249120790	249120984	55	common
chr1	249152907	249152930	GTCGTGTCCTGGCGTGCAGC	+	chr1	249152813	249153034	55	common
chr1	249219013	249219035	CGGCACTGGAGGTTGGCTC	+	chr1	249219026	249219191	55	common
chr1	249219013	249219036	CGGCACTGGAGGTTGGCTCT	+	chr1	249219026	249219191	55	common
chr12	49247131	49247154	CTACTCCAGAGAGAACGCAA	+	chr12	49247126	49247286	55	common
chr12	49284610	49284633	CACACACGCCTTTAATGCGG	+	chr12	49284554	49284776	55	common
chr1	2493487	2493510	GTCATAGAGTGCGTGGGCAG	-	chr1	2493463	2493617	49	common
chr12	49389428	49389450	GCCAGGCAAGGAAAGAGGC	-	chr12	49389275	49389489	55	common
chr12	49390761	49390784	CTCGGACACGGACGAAGCTG	-	chr12	49390615	49390808	49	common
chr12	49482088	49482111	CTCCCAGGAGGGAGAGATGA	-	chr12	49482097	49482282	55	common
chr12	49731091	49731113	AGGGGCAGTGGGGGAGTGG	-	chr12	49730918	49731149	55	common
chr12	49741582	49741605	GTGTGGGAGGAGCTGGGCCC	+	chr12	49741479	49741684	55	common
chr12	50030843	50030866	CTCTACTGGCAGTTTCTGGG	-	chr12	50030776	50030945	55	common
chr1	25015276	25015299	AGAAAGCATGGAGAAGCCGG	-	chr1	25015145	25015323	55	common
chr12	50156955	50156978	TGAGAAGTGGGACCAGCAGA	+	chr12	50156857	50157043	55	common
chr12	50170300	50170323	CTGAACTGCCACCCTGTGGT	-	chr12	50170197	50170372	55	common
chr12	50172126	50172150	CTCCCTGCAATGCCCTCAGGT	+	chr12	50171989	50172231	55	common
chr12	50360969	50360992	CCCAGGACTTGTGGACGACG	-	chr12	50360795	50361027	55	common
chr12	50469181	50469204	CTAGCAGCCCTGTCTTGCGC	-	chr12	50469024	50469242	54	common
chr1	25071402	25071425	GTCCTGGGGTGCTGCAGCGG	+	chr1	25071348	25071492	30	cell-type specific
chr1	25174489	25174512	TGCCTCTCGCAGCAGGAGGT	-	chr1	25174467	25174677	55	common
chr1	25176352	25176375	CAACTCCCTGCCGTCTGCAG	+	chr1	25176279	25176453	51	common
chr12	52317342	52317366	GACGTGGCAGGTGCGGCGACT	-	chr12	52317290	52317477	55	common
chr1	25236195	25236218	GTGCGAACAGGGACGTTCCC	-	chr1	25236089	25236333	39	common
chr1	25236219	25236241	GGAGAAGCTGCAGCCACTA	-	chr1	25236089	25236333	39	common
chr12	52364745	52364766	GTGCCTCTTCCCTTTCAC	+	chr12	52364659	52364856	55	common
chr12	52515771	52515793	GAGCCACCTGGCAAGGAAC	+	chr12	52515696	52515907	55	common
chr12	52565992	52566015	GCCCTCCACCAGCTTCCTGT	+	chr12	52565909	52566108	49	common
chr12	52766564	52766587	GGCAGAAGCAGAGAAGGCCA	+	chr12	52766401	52766617	55	common
chr12	53086269	53086292	GTGACTACCAGGCCATGCTG	-	chr12	53086138	53086345	23	cell-type specific
chr12	53264491	53264514	GTGCCGCCCTGGGAGCTGGG	-	chr12	53264338	53264552	55	common
chr12	53370183	53370206	CGGGGAAGGCTTCAGGGAGG	-	chr12	53370145	53370285	25	cell-type specific
chr12	53493314	53493337	CAGGGACACACATTCCTTTT	+	chr12	53493294	53493479	55	common
chr12	53937371	53937394	GAGCTCTAGTAGGCGAAGGC	+	chr12	53937325	53937498	55	common
chr12	53937423	53937446	GTTGCCTCAAAGCCAGCAGG	+	chr12	53937325	53937498	55	common
chr12	54095793	54095816	CATTTCCATCCTGTTGGGCC	-	chr12	54095606	54095866	54	common
chr12	54095853	54095876	GGGAAAGGCGGGGAAGGCAA	-	chr12	54095606	54095866	54	common
chr1	25428092	25428115	TGGCGCCCTCTGCTGTCCGT	+	chr1	25428005	25428233	54	common
chr1	25428096	25428119	GCCCTCTGCTGTCCGTTGGC	+	chr1	25428005	25428233	54	common
chr12	54601766	54601789	CCAGGCTGCCATCCCTTCTC	-	chr12	54601658	54601887	54	common
chr12	54754754	54754777	TGAGGACACAAGGCAGGACT	-	chr12	54754732	54754940	55	common
chr12	54764226	54764249	GAGCTGCCCAAGTCCCTGGC	-	chr12	54764105	54764290	45	common
chr12	54973577	54973598	AGCTGGGGCTTGGAGGGC	+	chr12	54973559	54973781	55	common
chr12	54973625	54973647	CACTTGGCCCATGGGAAAG	-	chr12	54973559	54973781	55	common
chr12	55074245	55074267	GAGAGGGTGGCATGCCCAC	+	chr12	55074253	55074428	55	common
chr1	25574347	25574370	CTCGCAGCCGGGCTCGGAGC	+	chr1	25574335	25574530	37	common
chr12	56131004	56131026	GGGAGCTGTTGGGAAGCAG	-	chr12	56130959	56131284	55	common
chr12	56551690	56551713	TGGAACGTGCTTTCGCCTGC	-	chr12	56551608	56551808	53	common
chr12	56600467	56600490	AGGACAGCCACTCTCCACCA	+	chr12	56600389	56600613	55	common
chr12	56618039	56618062	CAGGGCAGGCGGCGGGACGC	+	chr12	56617862	56618273	54	common
chr12	5665506	5665529	GTCTTCCGCAACTCAGGCCC	-	chr12	5665348	5665511	52	common
chr1	25729655	25729678	AGTCACCCCATCCTCATCTG	+	chr1	25729586	25729720	14	cell-type specific
chr1	25729660	25729683	AGTGGCCCCAGATGAGGATG	-	chr1	25729586	25729720	14	cell-type specific
chr12	57381428	57381451	GGACTGGGAGGGGGAAGGAG	+	chr12	57381390	57381603	55	common
chr12	57506234	57506257	CATAGCAGGGGCTGGGCTGA	+	chr12	57506200	57506371	55	common
chr12	57567014	57567037	CATCGCAGCGCCACCGCAGG	-	chr12	57566903	57567096	55	common
chr12	57567015	57567037	CATCGCAGCGCCACCGCAG	-	chr12	57566903	57567096	55	common
chr1	25757642	25757666	CCGTAAATGCCCTCGGTGATC	-	chr1	25757555	25757689	9	cell-type specific
chr12	57576880	57576902	GTGGAGGCCGGCAGAGCAC	+	chr12	57576839	57577067	55	common
chr12	57577038	57577060	GATAGGGATGATGGTGGGG	+	chr12	57576839	57577067	55	common
chr12	57633093	57633116	CGGGCCGCTAAGTTGGTGCC	+	chr12	57632923	57633142	53	common
chr12	57633111	57633134	TGGGCGTGGACGGACACTCC	-	chr12	57632923	57633142	53	common
chr12	57846797	57846820	GCTGCCCCTTCCCTGTCCCT	+	chr12	57846776	57846990	54	common
chr12	58015588	58015611	CCGGGATCGGCGTGGGTAGC	-	chr12	58015550	58015825	55	common
chr12	58150641	58150664	GTCGGGGAGCGCGGCTGAGT	+	chr12	58150615	58150825	54	common
chr12	58150770	58150793	TCTCGCTGATCCAGCGGATG	-	chr12	58150615	58150825	54	common
chr1	25828478	25828501	GATGCAGCAGCCCCAAGAGC	-	chr1	25828363	25828551	44	common
chr12	58299356	58299379	ATCCTGAACAACGCAGGGCA	-	chr12	58299186	58299443	53	common
chr1	25830517	25830539	GCGGGGAGCTGGCAGCTGG	-	chr1	25830329	25830570	55	common
chr1	25899439	25899462	CCTGACGGCTGTGGCCCCAG	-	chr1	25899332	25899549	55	common
chr1	25945749	25945772	CGTGGGCAAGCTGTGGGCCA	+	chr1	25945632	25945846	55	common
chr12	59766949	59766972	CATGGCTCTACCCCAGTAGG	-	chr12	59766847	59766981	46	common
chr1	26019203	26019226	CGCCAAGAACACAGTGGGGT	+	chr1	26019162	26019383	55	common
chr1	26019205	26019228	CCAAGAACACAGTGGGGTAG	+	chr1	26019162	26019383	55	common
chr1	26027293	26027316	GGACAGGCCAGGCCAAGCGT	+	chr1	26027257	26027394	18	cell-type specific
chr12	6075215	6075238	TGAACACCAGAGGGCACTGC	+	chr12	6075110	6075325	55	common
chr12	6097979	6098003	GTGATAGTCACGCCTGGGCCC	-	chr12	6097816	6098008	55	common
chr1	26124698	26124721	GTCAGCTCTGGGACTGGCAG	-	chr1	26124600	26124784	51	common
chr1	26137606	26137629	CCTCAAGGCGGGTCACAGGG	-	chr1	26137396	26137624	55	common
chr12	6149299	6149322	CCCAGAGTTACCCTTGCCGC	+	chr12	6149312	6149447	55	common
chr12	6149318	6149342	CCGGACTCAGGAAGGGTGAGC	+	chr12	6149312	6149447	55	common
chr12	6172505	6172528	AGGGCACCTGCCTACAGCCC	-	chr12	6172394	6172568	55	common
chr1	26201706	26201729	GGGGGCGTCTTGGGAAGGGT	-	chr1	26201685	26201855	25	cell-type specific
chr1	26201754	26201776	CGGGGAAGCAGCCAGCGGA	-	chr1	26201685	26201855	25	cell-type specific
chr1	26222032	26222055	TCTGCAGCTCTCCATCCCCT	-	chr1	26221918	26222187	55	common
chr12	62653947	62653970	CGGCAGTCCCGGGCCAGAGG	+	chr12	62653893	62654101	54	common
chr1	26284362	26284385	TAGGCACAGAGTCTTGCAGC	+	chr1	26284224	26284455	12	cell-type specific
chr1	26324863	26324885	GAGGCGGAGGGTTACGCAC	-	chr1	26324689	26324923	55	common
chr1	26324890	26324913	GCACGCCTGAGGACTATTTG	-	chr1	26324689	26324923	55	common
chr1	26362575	26362599	AGACGGCCGAGGCTGAGCCGC	-	chr1	26362468	26362728	55	common
chr1	26362655	26362678	CGCATGTCCAGAGGGCGGCC	+	chr1	26362468	26362728	55	common
chr1	26362662	26362685	TCCACATCCCGGCCGCCCTC	-	chr1	26362468	26362728	55	common
chr1	26496374	26496397	GCTACGTCAGGCCACGCCGG	-	chr1	26496189	26496423	55	common
chr1	26503773	26503796	TGCCACTGGCCTCATATCGC	-	chr1	26503689	26503858	15	cell-type specific
chr1	26503799	26503822	GGCATCTCGCGCCTGCTAGG	-	chr1	26503689	26503858	15	cell-type specific
chr12	65091916	65091939	ATGGCACAAAGCCGAGGTGC	-	chr12	65091871	65092106	55	common
chr1	26517037	26517060	GCCTCTGTGATATCACCACG	+	chr1	26516922	26517143	37	common
chr12	65196200	65196223	GTCGTCCCAGGTACTGGATC	-	chr12	65196067	65196264	55	common
chr12	65996451	65996474	TGGCGCTCCACATCGAATTT	+	chr12	65996332	65996497	55	common
chr1	26606204	26606227	GAGCCGCTCTCTCCAGGAGG	-	chr1	26606119	26606317	54	common
chr1	26611675	26611698	GTCAAGGTGTCCTGAAAGCT	+	chr1	26611595	26611853	55	common
chr1	26611717	26611739	GGAGACAGCCTCGGCTGCG	-	chr1	26611595	26611853	55	common
chr1	26654689	26654712	CGCTACCCACCTGCTTGATG	+	chr1	26654613	26654847	8	cell-type specific
chr12	66673079	66673103	GTCATGGTTGGTCACTGGTGC	-	chr12	66672995	66673221	53	common
chr1	26690493	26690517	TCACCATCCGCATCGCCCAGC	-	chr1	26690366	26690629	55	common
chr1	26690529	26690551	CGGCGGTCGCGCAGATTTG	+	chr1	26690366	26690629	55	common
chr1	26718129	26718152	GAAAGGGGTCATGTGGGGTA	+	chr1	26718049	26718282	52	common
chr1	26743737	26743759	CCTGGCTGTGGCTGAGCAG	+	chr1	26743604	26743828	55	common
chr1	26743747	26743770	GCTGAGCAGAGGGGATCAGA	+	chr1	26743604	26743828	55	common
chr12	6807209	6807232	CAGACATGGAGTCCAGGATG	-	chr12	6807101	6807259	53	common
chr1	26857817	26857840	TAGTAGCGGGGTGGCAGTAC	-	chr1	26857687	26857919	44	common
chr1	26857830	26857853	TGCGCCCCGGTCCTAGTAGC	-	chr1	26857687	26857919	44	common
chr1	26857843	26857864	CCGGGGCGCAAGGTCCTG	+	chr1	26857687	26857919	44	common
chr1	26857843	26857865	CCGGGGCGCAAGGTCCTGG	+	chr1	26857687	26857919	44	common
chr12	6888306	6888329	CTCCTCAGGCCTGCCGCAGC	-	chr12	6888178	6888367	55	common
chr1	2689077	2689099	GGCTGTGAGATGCTCACCT	-	chr1	2688873	2689152	19	cell-type specific
chr12	69293101	69293124	GCAGAGGACAGTGCTGAACT	+	chr12	69293018	69293181	26	cell-type specific
chr12	6934896	6934919	GCTCCTTCTCAGCCAGAGGA	+	chr12	6934825	6935049	55	common
chr12	6935029	6935052	GGGGAGCCTAGGCCCAGTGA	-	chr12	6934825	6935049	55	common
chr12	69548534	69548557	CATGTGACCTTCCTTCCCTC	+	chr12	69548492	69548665	55	common
chr12	69551035	69551058	CAGCAGGCTGAGCAGAAACG	+	chr12	69550887	69551131	55	common
chr12	69684999	69685022	CTGCAATACTGTGGCGTCTT	-	chr12	69684780	69685073	55	common
chr12	7047340	7047363	GTCACGTCGCCACCTGTCGG	+	chr12	7047238	7047429	55	common
chr12	70983969	70983992	TGGAGGCAAACAATAATGGC	-	chr12	70983810	70984047	55	common
chr1	2718285	2718308	GGCACAGCCTGCGGTTTCCC	+	chr1	2718262	2718458	43	common
chr1	27189341	27189364	GAGAAGCCGTTTCCTGATGT	+	chr1	27189307	27189477	53	common
chr12	72332689	72332712	CAGCGCTGGCGGAGATTGAG	-	chr12	72332646	72332814	53	common
chr1	27293477	27293500	TAGGCAGTGGTGTGTGGAGC	+	chr1	27293462	27293683	55	common
chr12	72964628	72964651	GTCGCACCTTACACAACTTT	-	chr12	72964494	72964671	48	common
chr12	7341244	7341267	CAGGCAGCAGGTGGCGCCAT	-	chr12	7341169	7341343	55	common
chr12	7341256	7341279	AGCGGAGGCAGGCAGGCAGC	-	chr12	7341169	7341343	55	common
chr1	27424022	27424044	CCAGGTTCGAAGGGTGCCA	+	chr1	27423974	27424166	55	common
chr1	27424022	27424045	CCAGGTTCGAAGGGTGCCAG	+	chr1	27423974	27424166	55	common
chr1	27429250	27429273	GCCAAGTCAAGCCTCGCTGT	+	chr1	27429247	27429447	55	common
chr12	74505671	74505694	CTTGGGGCGCCCCCTAATGC	-	chr12	74505576	74505710	44	common
chr12	75728343	75728367	CAACTTGTCAGTGTCGCTGTG	-	chr12	75728181	75728370	55	common
chr1	27627408	27627431	CTGCAGAGCTGCGGGTGCCT	+	chr1	27627338	27627560	55	common
chr1	27633448	27633471	TCCACAGCGACCTCAGCAGG	-	chr1	27633362	27633580	21	cell-type specific
chr1	27684200	27684223	CCAGGAGCAGAAGCAAGAGC	-	chr1	27684064	27684280	55	common
chr1	2792699	2792722	GGGAAAGGCAGGCCAGGCGC	-	chr1	2792554	2792751	21	cell-type specific
chr12	79767877	79767900	GCAGTACTCAAGGTTTCCTG	-	chr12	79767764	79767943	52	common
chr12	8384508	8384531	AGGGCCCACCACAGCTTCCC	-	chr12	8384388	8384618	26	cell-type specific
chr1	2838716	2838739	GTCCGTCTGTCTGGGCTCTG	+	chr1	2838682	2838939	46	common
chr12	8390186	8390209	GCCCCGTCCTAGGATTCACA	+	chr12	8390157	8390361	55	common
chr12	8390206	8390229	AGGCAGCAGCAGGGTACACT	+	chr12	8390157	8390361	55	common
chr12	8390263	8390286	GTGCATCTGTGGTTGCCAGC	-	chr12	8390157	8390361	55	common
chr1	2862942	2862965	GTAACGGTGAGGGGAACAGC	+	chr1	2862911	2863078	13	cell-type specific
chr12	9102687	9102710	GGCGGAACAGCGTCCCTCTC	-	chr12	9102604	9102763	52	common
chr1	29172866	29172888	CCACGGTCAGGTTCTGGTG	+	chr1	29172839	29172975	48	common
chr12	94430	94453	AAGCAAGGGGCTGTCGATCC	+	chr12	94364	94524	34	common
chr12	94495327	94495350	GGGAGAAGGGCGCCCTCTGC	+	chr12	94495230	94495427	55	common
chr12	9483932	9483955	GTGGGCACCAGGGACATGGG	-	chr12	9483816	9484023	55	common
chr12	95467372	95467395	CGTTGCTAATGCGCAGGCGC	-	chr12	95467388	95467582	55	common
chr12	96883316	96883339	GCGACGGTCTCGTGGCAACC	-	chr12	96883180	96883373	55	common
chr12	97528456	97528479	CCAGCAGCTAGGAGGAGGCA	+	chr12	97528405	97528539	24	cell-type specific
chr12	9966917	9966939	CCGGCTGTGGAGATGGCAG	-	chr12	9966830	9967054	54	common
chr12	9966944	9966967	CCAGCGGCGTGCTTGGGTGG	-	chr12	9966830	9967054	54	common
chr1	30129505	30129527	GCCCCCTAGTGGGCGTCGG	+	chr1	30129323	30129589	48	common
chr1	30853284	30853307	GGGGAAGCCACCTGTGCTAC	+	chr1	30853288	30853512	55	common
chr13	103109784	103109807	GGGAGGCTCATGCCCAACTC	+	chr13	103109778	103109967	55	common
chr13	107570514	107570535	GGGGAGCCGAGGCTGGGC	+	chr13	107570442	107570680	55	common
chr13	107570515	107570536	GGGAGCCGAGGCTGGGCC	+	chr13	107570442	107570680	55	common
chr13	111472015	111472037	CTACGGCCGAGGCTGAGGC	-	chr13	111471901	111472112	55	common
chr13	111472015	111472038	CCAGCCTCAGCCTCGGCCGT	+	chr13	111471901	111472112	55	common
chr13	112051274	112051297	CGCGTGCTCTCTACAGCGTG	+	chr13	112051176	112051394	9	cell-type specific
chr13	112051300	112051323	CGTGTGCCCTCTACAGTGTG	+	chr13	112051176	112051394	9	cell-type specific
chr13	113271433	113271456	GACACATGGAGGTTATGCGT	-	chr13	113271387	113271524	54	common
chr13	113324757	113324780	GGTCACCCTGGCTCCTGCCT	+	chr13	113324662	113324799	7	cell-type specific
chr13	114520072	114520095	TTTCGTGTTGTCATGAGGCT	+	chr13	114519983	114520227	55	common
chr13	114909339	114909362	GGAGCCTGCACACAGGTCTG	+	chr13	114909220	114909482	39	common
chr1	31252661	31252683	CCCGTGTGGTGCCTTCTCT	-	chr1	31252515	31252703	55	common
chr1	32014716	32014739	CCTCCCCTTTGAACCAGGCA	-	chr1	32014567	32014735	55	common
chr13	20534316	20534338	TGGTGAGGCAGCTGGGAGT	+	chr13	20534316	20534517	55	common
chr13	20534317	20534338	GGTGAGGCAGCTGGGAGT	+	chr13	20534316	20534517	55	common
chr13	20534388	20534411	AGCCCGTCGTCTGGTTGCTG	-	chr13	20534316	20534517	55	common
chr13	21715071	21715094	GGGAGAACTCGTCCATTCGG	-	chr13	21715040	21715178	0	cell-type specific
chr13	21755116	21755139	GTTCGGCTTCCCTAAGTGCT	-	chr13	21754969	21755124	55	common
chr13	21755117	21755139	GTTCGGCTTCCCTAAGTGC	-	chr13	21754969	21755124	55	common
chr1	32180071	32180094	GACAGACCCATGAGCTTGGG	+	chr1	32180045	32180179	47	common
chr1	32180108	32180131	GCAGACGTGACTGTCCTGCC	+	chr1	32180045	32180179	47	common
chr1	32181413	32181436	CCAAGCTTCCCGCTAGGTGG	-	chr1	32181300	32181523	53	common
chr1	32254973	32254997	GCCCCCTCTGCTGTCGTCCGC	+	chr1	32254895	32255103	54	common
chr1	32281633	32281656	GGGGAGGGAGGCCCTTGCTG	+	chr1	32281628	32281797	55	common
chr1	32281795	32281817	TGGGTGCATGGGGCAGCGA	+	chr1	32281628	32281797	55	common
chr1	32281795	32281818	TGGGTGCATGGGGCAGCGAG	+	chr1	32281628	32281797	55	common
chr13	23981211	23981234	TGGCCCTCTAGTGGCTGTCC	-	chr13	23981136	23981322	52	common
chr13	24290193	24290216	CCAGGGAACCACGGTGGTGT	-	chr13	24289994	24290234	43	common
chr13	25980698	25980721	GGGCACTCATATATCTGCCT	+	chr13	25980701	25980856	33	cell-type specific
chr1	32681328	32681351	GGGACCTCCTGGCTGAGAGC	+	chr1	32681265	32681465	55	common
chr1	32714027	32714050	CCATCTTCAGTCGGTGCAGC	-	chr1	32713858	32714066	55	common
chr13	27447158	27447181	CCTGAGTAGCCGCTGCTCGT	+	chr13	27447120	27447331	55	common
chr13	27447166	27447189	GCCGCTGCTCGTGGGATGCA	+	chr13	27447120	27447331	55	common
chr13	28286753	28286776	CATAAACTCATTGGCCCTGG	-	chr13	28286602	28286792	34	common
chr13	28572173	28572196	GTAGTCGCGAAGTCAGGCCT	+	chr13	28572132	28572346	54	common
chr13	29379512	29379535	GCCACACCGCCTGGGAAGTG	-	chr13	29379436	29379649	47	common
chr13	31508730	31508753	TGCCGATGGCTACCTGAAGC	-	chr13	31508617	31508777	22	cell-type specific
chr13	31618639	31618662	GTGAAAGGCCTGCACACTTC	+	chr13	31618613	31618819	55	common
chr13	31735769	31735792	CGGCAGGAGAAGCAGGCAGG	-	chr13	31735705	31735839	2	cell-type specific
chr1	33238788	33238811	CTCCCAACTCTGCAGCCTCA	-	chr1	33238688	33238899	54	common
chr1	3326860	3326883	GTCCTGGAGTCTAGCTGGGC	+	chr1	3326782	3327003	30	cell-type specific
chr1	33342452	33342475	GTTCCTGCGCTGGGGCAATG	-	chr1	33342323	33342512	55	common
chr1	33342460	33342483	CTGGGGCTGTTCCTGCGCTG	-	chr1	33342323	33342512	55	common
chr13	34116937	34116960	CCAGGCTCTGGCTCTCGGTG	+	chr13	34116894	34117189	55	common
chr13	34116977	34117000	GAGTCTCCCGCCACCCGCGG	+	chr13	34116894	34117189	55	common
chr1	3348053	3348076	AGGACATGGGGAAGTGGCCC	-	chr1	3347905	3348117	42	common
chr1	3369877	3369900	AGGCAGCTCTTGGGAAAGGC	-	chr1	3369761	3369989	55	common
chr1	33833533	33833556	CGGTCCCTGGCGCCCTCTGC	+	chr1	33833463	33833661	55	common
chr1	3399196	3399218	GGGGGCATCTGGGGCAACC	+	chr1	3399168	3399334	35	common
chr1	3399197	3399220	GGGGCATCTGGGGCAACCTG	+	chr1	3399168	3399334	35	common
chr1	3400581	3400604	GTGAGAGGAAGGTGTGCGGC	-	chr1	3400489	3400760	55	common
chr1	3400679	3400702	GGCTGGCCCTGGGACCCCGG	+	chr1	3400489	3400760	55	common
chr13	45492595	45492617	CTGGACCAGCGCTGAGGGG	-	chr13	45492438	45492602	55	common
chr13	46085939	46085963	CTCCAAGTAAGGACTGAATGC	-	chr13	46085824	46085987	55	common
chr13	50510520	50510542	CGCAATGCAGGCTGAGCTT	+	chr13	50510383	50510614	54	common
chr1	35058027	35058050	GGCACACGAAGCTTCGGCAG	-	chr1	35057961	35058101	34	common
chr1	35208402	35208425	GGCGGAGGCTGCAGGAGCCC	+	chr1	35208358	35208559	54	common
chr13	53024809	53024832	GGACGGAAGCGAGTCGGGGC	+	chr13	53024710	53025017	55	common
chr1	3535817	3535840	GTGGCTGTGAGGTCCCGGGA	-	chr1	3535659	3535850	55	common
chr1	3537821	3537844	CTGACGCTGCCACTAGACCA	+	chr1	3537818	3538022	53	common
chr1	3612389	3612412	CCTGGATCGTCCCAGCCTGC	-	chr1	3612255	3612592	55	common
chr13	62455092	62455115	GGGAGCTGGGGCCTGAGTAG	+	chr13	62455056	62455228	51	common
chr13	62786634	62786656	GGCCCCACAGCGCTGTGGC	+	chr13	62786518	62786674	8	cell-type specific
chr1	3641151	3641174	GTCACACGGCAGCCACCAGG	-	chr1	3641038	3641271	55	common
chr1	36552985	36553008	GCTGGACTCACGTGCATGCC	-	chr1	36552888	36553068	11	cell-type specific
chr1	36553032	36553055	CGATCTCCTCCAAGGTCTGC	-	chr1	36552888	36553068	11	cell-type specific
chr1	36565286	36565308	CCTAGGTAGGTTGGGTGTT	-	chr1	36565298	36565459	55	common
chr1	36615309	36615332	CCGCAGCCTTCGGTAATCCT	+	chr1	36615211	36615385	54	common
chr13	67990586	67990608	CTCGGAGCCACAGTAGGTG	+	chr13	67990540	67990754	52	common
chr13	67990624	67990647	TGGGCACAGTGCCGCCTGCT	+	chr13	67990540	67990754	52	common
chr1	36808506	36808528	CTTGGGCACCAGGCAGCAG	-	chr1	36808378	36808570	53	common
chr1	3692653	3692676	CTGTCATCGGCCCCACACGG	+	chr1	3692566	3692756	46	common
chr1	36982150	36982173	GCTTTGCAGGCCTCAGGTCC	+	chr1	36982049	36982210	55	common
chr1	3702122	3702145	TCCCTTCCTCCCCAAGCTGC	+	chr1	3702055	3702314	40	common
chr1	3702128	3702151	GTCCTGCCTGCAGCTTGGGG	-	chr1	3702055	3702314	40	common
chr1	37116273	37116296	GCTCAATACGTTTGATGAGT	-	chr1	37116155	37116369	55	common
chr1	37169488	37169511	GCAGCAGAGGGCAGCAGAGC	+	chr1	37169374	37169576	54	common
chr13	72795564	72795587	CTCTCAGAATGGTGCTGGCT	+	chr13	72795584	72795779	52	common
chr13	72795582	72795605	CTGGGCGCCTGCCACTGGGA	+	chr13	72795584	72795779	52	common
chr13	72795761	72795784	GGCAGCGTTGCCATCAGGGC	+	chr13	72795584	72795779	52	common
chr13	75794031	75794054	GGGGGCGGAGCGCCATCTAC	+	chr13	75793947	75794166	54	common
chr13	76056800	76056824	CTCTGCTGCCCCCTAGAGAGG	+	chr13	76056721	76056900	55	common
chr13	76123542	76123565	TGTCAACCGACTGCGCTAGG	-	chr13	76123436	76123645	55	common
chr1	37643123	37643146	CTGTTGGTGACGTGGAGTGC	-	chr1	37642968	37643149	49	common
chr13	77554338	77554360	CTGGGGTATGTGGGGCTGC	-	chr13	77554330	77554549	54	common
chr13	77554392	77554413	GCGGGTGCAGCCGGAGGT	-	chr13	77554330	77554549	54	common
chr1	38027602	38027623	CCCATGTCCCTTCCACCC	+	chr1	38027475	38027618	54	common
chr13	80917110	80917133	ATTGAGCCGACGGTGAACGC	+	chr13	80917054	80917274	55	common
chr1	3827470	3827493	CACCCTTGGCCGCCTTAGGT	+	chr1	3827422	3827614	55	common
chr1	38385137	38385160	GTCCCCCTGGTGGTGTGTGC	-	chr1	38385015	38385236	48	common
chr1	38455835	38455858	CCACCACACCTCCCACCAGC	-	chr1	38455723	38455963	54	common
chr1	39052887	39052909	GGCAGCCAAGAGCAGCCCT	-	chr1	39052817	39053020	55	common
chr13	98227355	98227378	GAGGCAGCGCAGCCCAGTGG	+	chr13	98227308	98227449	52	common
chr13	99002336	99002359	GTGGGAAGCCAGCAGAGGTG	+	chr13	99002307	99002451	30	cell-type specific
chr1	40075352	40075375	GTGAGCCTGGAGCCACTGGG	+	chr1	40075350	40075590	50	common
chr1	40105797	40105820	CCCCTATGGAGTTGCTGCTG	-	chr1	40105604	40105806	37	common
chr1	40119377	40119400	GCCACCTACTGGCAGAAAGG	+	chr1	40119296	40119488	55	common
chr14	100491737	100491760	GCATAAGCCACGTGGCCACC	-	chr14	100491650	100491819	53	common
chr14	100574874	100574896	CCTGGGGTGAGAACAGGGG	-	chr14	100574756	100574915	55	common
chr14	101174895	101174917	GGAGGGTGTGGGGCAGGAG	-	chr14	101174794	101174950	21	cell-type specific
chr14	101649827	101649849	CTCCAAGCCCACAGCGCCT	-	chr14	101649715	101649853	21	cell-type specific
chr14	102427530	102427552	GGGCAGCAGGCTGGGGAGG	+	chr14	102427523	102427693	55	common
chr14	102512869	102512892	GCGGGTCTGGAGCACACTGC	+	chr14	102512849	102513046	48	common
chr14	102780722	102780743	GTCACGGCGCCCCGGCCC	+	chr14	102780641	102780860	55	common
chr14	102904547	102904568	CGGGAGCAGGGAGCGGGG	-	chr14	102904416	102904613	55	common
chr14	102964859	102964883	GAGACCAGGACGGCAGCACGT	-	chr14	102964732	102964888	41	common
chr14	103966680	103966703	GGACGGTGCTCATGGCAGGC	-	chr14	103966548	103966762	55	common
chr14	104006038	104006061	CAGCGTGCCTGGCATGTGGT	-	chr14	104005916	104006079	9	cell-type specific
chr14	104013339	104013362	GGCAGGTGCGTGGCGTTTGG	+	chr14	104013243	104013439	55	common
chr14	104015995	104016018	GAAGACCAGAAGCCGTGTCC	-	chr14	104015911	104016089	4	cell-type specific
chr14	104016442	104016465	TGGGGAGGCTCTGGGCGGAA	-	chr14	104016425	104016602	1	cell-type specific
chr14	104016553	104016576	CTCAAAGCACCGAGTCCCCC	-	chr14	104016425	104016602	1	cell-type specific
chr14	104145896	104145919	CAGCGGGCACGTGCTCCGGG	+	chr14	104145843	104146005	54	common
chr14	104376818	104376841	TGTCACCTGGGCTTCCCCGT	-	chr14	104376769	104376966	55	common
chr14	104561196	104561219	CGTAGGCCTGGGAACTGCAG	-	chr14	104561045	104561243	55	common
chr14	104603882	104603905	CGCGTGTCCTGGTCTCCGCC	+	chr14	104603877	104604075	51	common
chr14	104691005	104691028	GTGCTGTGGCATGGATGGGT	-	chr14	104690911	104691045	47	common
chr14	105197792	105197815	TGGGCTTCCTCTCCACCTGT	+	chr14	105197656	105197899	50	common
chr14	105234974	105234997	TCGGCAGTGGACTCCTCTCC	+	chr14	105234921	105235137	55	common
chr14	105818728	105818751	GCACAATCTCATGGGACCGC	-	chr14	105818651	105818838	55	common
chr14	105837230	105837253	CCTGGGTTCAGGACCTGAAG	+	chr14	105837216	105837410	55	common
chr14	105957053	105957075	CTGCGCTGTGCGGCGCGGC	+	chr14	105957010	105957171	54	common
chr14	106004346	106004369	GGCGACACTGCAGGCTCCGC	-	chr14	106004265	106004479	55	common
chr14	106501561	106501584	GGGGCGCTCAGCACAAGCAG	-	chr14	106501517	106501769	49	common
chr14	106598137	106598159	TGGGCGCTCAGGACACCAG	-	chr14	106598058	106598192	14	cell-type specific
chr14	106734224	106734247	GGCAGGTGCACAGGAGGCTG	-	chr14	106734183	106734361	46	common
chr14	106734225	106734247	GGCAGGTGCACAGGAGGCT	-	chr14	106734183	106734361	46	common
chr14	106805144	106805165	CCTGCAGGGAGGCGGAGG	-	chr14	106805038	106805258	35	common
chr14	106829576	106829599	GCGAGAGGCACAGTGAGGGG	-	chr14	106829402	106829603	48	common
chr14	107020244	107020267	GGAAGCTCAGGAACTGCGGG	-	chr14	107020137	107020337	48	common
chr14	107147665	107147688	CGGGGGCACTCAGAACCACC	-	chr14	107147673	107148023	50	common
chr14	107147741	107147764	GAGGCACTCAGGACCACCAG	-	chr14	107147673	107148023	50	common
chr14	107147878	107147901	GGGGAAGCTCAGAATGACCT	-	chr14	107147673	107148023	50	common
chr14	107210850	107210872	GGGCTACCAGGGGGCGCTC	-	chr14	107210759	107210968	32	cell-type specific
chr14	107210850	107210873	GGGGCTACCAGGGGGCGCTC	-	chr14	107210759	107210968	32	cell-type specific
chr14	107239146	107239169	GATGCTGAGGACACAAGGGG	-	chr14	107238839	107239236	55	common
chr14	107280980	107281002	GTGACCGCAGGGAGGCGGA	-	chr14	107280830	107281050	44	common
chr14	107280981	107281002	GTGACCGCAGGGAGGCGG	-	chr14	107280830	107281050	44	common
chr14	107287593	107287616	CAGGACACCAGGGGACGCTC	-	chr14	107287488	107287726	50	common
chr1	41314309	41314332	GGAGGGAAGCAGAGCCACCT	+	chr1	41314306	41314470	54	common
chr1	41748578	41748601	CCAGCAGCTGCTGCCAAAGG	+	chr1	41748454	41748655	55	common
chr14	21458534	21458557	GCTACTTGGTGAGTAACGGC	+	chr14	21458473	21458699	51	common
chr14	21558560	21558583	TTCCACCTCTGGTCCGCCTG	+	chr14	21558493	21558709	53	common
chr14	21560892	21560916	GGCCTATGCAGGATGTGCAGG	+	chr14	21560769	21560951	53	common
chr14	23025982	23026005	TGGCGACACTACCGAAGAGC	-	chr14	23025907	23026318	54	common
chr14	23455938	23455961	CATGACTGAAACTGCCCACC	+	chr14	23455851	23456025	55	common
chr14	23527440	23527463	GAGGCACCAAGGTGGCAGGC	+	chr14	23527321	23527529	55	common
chr14	23527466	23527489	GCACGGTTAAATTAGGGGTT	-	chr14	23527321	23527529	55	common
chr14	23563825	23563848	CCTCAGGCCAGCAACGCCGT	+	chr14	23563752	23563911	43	common
chr14	23590256	23590279	CCTCCTTCCAGATGCCCCGC	-	chr14	23590054	23590318	53	common
chr14	23849237	23849260	GGTGCATGCATGCTCCCATG	-	chr14	23849226	23849415	55	common
chr14	23952575	23952598	TGGGAGTCTGGGGTGCAGGT	-	chr14	23952539	23952753	51	common
chr14	24101325	24101348	CGGGACAGGACGCCCCCTGC	-	chr14	24101234	24101442	55	common
chr14	24901015	24901038	GCAGCTCCTCCTGGACAGCC	-	chr14	24900985	24901246	55	common
chr14	24901049	24901071	CAGGAGGCGTCTAGTGGGC	+	chr14	24900985	24901246	55	common
chr14	25074772	25074795	GACTCCCCCTGTTGGCAATC	-	chr14	25074682	25074861	55	common
chr14	25881253	25881276	AGGCAGTGCAGTGGTGCCTG	+	chr14	25881221	25881355	17	cell-type specific
chr1	43212945	43212967	CTCGCTGTGTCGAGGGTCC	+	chr1	43212907	43213086	54	common
chr14	34801072	34801095	GACAGGTCTGAGCTGGTTCC	-	chr14	34800961	34801132	55	common
chr14	38455234	38455256	CTTCCCATCATGCTCCACC	+	chr14	38455135	38455316	55	common
chr1	43880505	43880528	GTGTGGAGGACCCTAAGCAG	+	chr1	43880450	43880634	55	common
chr1	43994950	43994972	CTGGCGTATGAGGAGGGGA	-	chr1	43994863	43995052	54	common
chr1	44400084	44400107	GTTGTCCGTGATGGAGGGAA	-	chr1	44399969	44400137	47	common
chr1	44412183	44412206	CTGCGGCCCAACTCCTTAGT	-	chr1	44412109	44412383	55	common
chr1	44460552	44460574	GCCAGGGTGAGGCAGGCGA	+	chr1	44460534	44460715	49	common
chr14	45996632	45996655	GAGGAGCCAAATGGCTGAAT	+	chr14	45996585	45996759	51	common
chr1	45118759	45118782	TGAGTCCCCACTATGGTGGC	-	chr1	45118589	45118811	55	common
chr14	51410910	51410933	TGCGGATCCAGCGCCCCACC	+	chr14	51410829	51410991	5	cell-type specific
chr14	51410953	51410976	CAGCGCGAAGTAGTAGTCGC	+	chr14	51410829	51410991	5	cell-type specific
chr1	45195034	45195057	CAGTGACTGAGGTATTGTGA	+	chr1	45195045	45195218	55	common
chr14	52243110	52243133	CGGAGGGCCTGGGAGGAACT	+	chr14	52243123	52243281	55	common
chr14	53899219	53899240	GGTTGGTGGTGAGGGTGG	+	chr14	53899111	53899271	54	common
chr1	45480242	45480265	CCCATGGTGAGGATTGGGAT	+	chr1	45480178	45480396	55	common
chr14	54908186	54908208	GGCGGCTGGGCTGGTGCGC	-	chr14	54908105	54908320	55	common
chr14	55272791	55272814	CCCGGGTCACATGCGGTGGA	+	chr14	55272629	55272818	55	common
chr14	59974200	59974223	CTGGAGAGGGCAGGACCTGC	+	chr14	59974165	59974330	55	common
chr14	59978792	59978815	CAATCACCCAGCTTTCCACT	+	chr14	59978807	59978997	54	common
chr14	60155302	60155325	CTGTCTGTGGCCAATGTGGC	-	chr14	60155261	60155463	55	common
chr14	61188581	61188604	GTGCGCCTTCCGCAGATATG	-	chr14	61188397	61188622	46	common
chr1	4645402	4645425	GCTGCACTGAGCTTCACATC	+	chr1	4645326	4645528	40	common
chr1	46502880	46502903	CTGGTGGCCACAGCCTTCCC	-	chr1	46502779	46503014	54	common
chr14	65227068	65227090	CTCAACCAGCAGGTGGCGC	+	chr14	65226997	65227163	55	common
chr14	65239296	65239319	GCTCCACCTGCTGGGTGTCC	-	chr14	65239234	65239395	23	cell-type specific
chr1	46645427	46645449	CGCTAAGAGAAGACTGGGA	+	chr1	46645322	46645502	55	common
chr14	66537616	66537639	GCAGAGGGCAGTGTCTGAGC	-	chr14	66537527	66537723	55	common
chr1	46689525	46689546	GGCCAGGTGATGGAGCTG	-	chr1	46689242	46689588	55	common
chr14	67983966	67983989	CTCTAGCTGTGGCCGGCGGC	+	chr14	67983946	67984096	20	cell-type specific
chr1	46912668	46912691	CCAGAATGCCGCGCCAGCAA	-	chr1	46912608	46912776	55	common
chr14	69283601	69283624	CACGTCTGGGCCCCTTTTGG	+	chr14	69283500	69283668	55	common
chr14	69291666	69291689	GGCACAGCGGCTGTCCGAGG	+	chr14	69291645	69291851	55	common
chr14	69813593	69813616	GGGGAGGTGAGGAGCAGGAG	-	chr14	69813554	69813728	53	common
chr1	4712835	4712858	CCTATGGCGGCCGGCGGGGA	-	chr1	4712704	4712919	55	common
chr1	4716591	4716615	CGCAGCTTCATCCCTGAGTGG	-	chr1	4716440	4716613	44	common
chr1	4716593	4716616	CCGCAGCTTCATCCCTGAGT	-	chr1	4716440	4716613	44	common
chr14	74684556	74684579	TCCCGCTTGCGGCTTCGCTC	+	chr14	74684424	74684647	54	common
chr14	75373925	75373948	GTTCTGTGGGCCAGGCTGCC	-	chr14	75373839	75373984	47	common
chr14	75380838	75380861	CCTCGCTCCTGCTGAGAAAA	-	chr14	75380765	75380982	55	common
chr14	75413220	75413243	CTGACACTGAGGCCACTAGG	+	chr14	75413092	75413339	55	common
chr14	75774580	75774603	GCTCAGTACAGGTTTGGTGG	+	chr14	75774573	75774749	55	common
chr1	47645074	47645097	CTCTGTCTCTTTCTGGTTGA	-	chr1	47644892	47645095	55	common
chr14	77013386	77013409	TCACACCCCATCACATGAAG	+	chr14	77013332	77013496	54	common
chr14	77251229	77251252	GTCTAGCACATTTGCTCAGG	+	chr14	77251222	77251459	55	common
chr14	78119985	78120008	CAGGCTGCTCCCCCAGTGGC	+	chr14	78119912	78120128	41	common
chr14	78283915	78283937	GGGAAAGGTCACATTGACC	+	chr14	78283796	78283997	49	common
chr1	47902320	47902343	CAGGAACTGAGCGGATGCCT	-	chr1	47902201	47902404	54	common
chr1	47902364	47902387	TCAGCCTCTGGGGCACGGAA	-	chr1	47902201	47902404	54	common
chr1	47915844	47915866	GGCCGGGTGAGCGGAGCGT	-	chr1	47915679	47915878	52	common
chr14	79303363	79303386	GTGGACAGTAGGTGGCGATG	-	chr14	79303307	79303465	53	common
chr14	83088621	83088644	CAGCCCTAGACACTGCCCTG	-	chr14	83088472	83088651	13	cell-type specific
chr1	48397329	48397352	GAAGCTTCCCTCTAGAAGGC	-	chr1	48397228	48397362	36	common
chr1	48463379	48463401	GGGAGGAGGAGGCGCGGGC	-	chr1	48463345	48463533	55	common
chr1	48963946	48963969	AGCAGCCGGGCCTCACCAGC	-	chr1	48963867	48964072	54	common
chr14	90866017	90866040	GGTGTCCATGGTGCAGTAGG	+	chr14	90865912	90866196	54	common
chr14	90866062	90866085	CTTGGCACCAGCTGCAGTGG	-	chr14	90865912	90866196	54	common
chr14	90985373	90985395	AGGGGTGTGAACGCCTGGC	-	chr14	90985332	90985523	53	common
chr14	93156815	93156838	CGTCGGTCCTGGGCTGGCCT	+	chr14	93156763	93156977	54	common
chr14	95016040	95016063	TGGGCGTGCAGGGCGGGTCT	-	chr14	95015852	95016076	55	common
chr14	95151692	95151715	GTGCAAGCAGCTGCCACTAT	+	chr14	95151694	95151851	10	cell-type specific
chr14	96027600	96027623	CGGGACTCGGGCTCTACCTG	-	chr14	96027323	96027611	55	common
chr14	98444928	98444951	GAGCTGGCAGGCAGCAGTGC	+	chr14	98444859	98445011	29	cell-type specific
chr14	99786599	99786622	GCAACGTGGAGCGGGGCAGG	-	chr14	99786476	99786651	55	common
chr15	101810253	101810276	GCAGCCTCTGCTGGTGGACA	+	chr15	101810151	101810328	51	common
chr15	20192893	20192916	GCTAGAGACACAGTGAGGGG	-	chr15	20192699	20192966	25	cell-type specific
chr15	20561867	20561890	CGATGAGACCCCAGCCCTGG	-	chr15	20561591	20561889	54	common
chr15	22511238	22511261	GTCGACACCAGGTGGCGCCC	+	chr15	22511131	22511317	44	common
chr15	22836954	22836977	TGTGGGTTCCCTGAACACGG	+	chr15	22836796	22836981	55	common
chr15	23061275	23061298	TGGCCACGGTGACAGGCCAC	+	chr15	23061149	23061406	47	common
chr15	24123350	24123373	CTGGCGCCAGGACGCAGGAG	+	chr15	24123149	24123370	49	common
chr1	52468176	52468199	TCTGGACTGACCAGTAACCA	+	chr1	52468085	52468269	55	common
chr15	25955392	25955415	GTGACACCACCTGAGGGAGT	+	chr15	25955308	25955541	50	common
chr15	25955435	25955458	CTCGACTGTCCCTGCCCAGC	-	chr15	25955308	25955541	50	common
chr15	26179234	26179257	TGTCGCTCACAGCACACTGC	-	chr15	26179166	26179339	48	common
chr15	26189679	26189702	GTGGAGGGCGAGGGAAGGGC	-	chr15	26189635	26189769	12	cell-type specific
chr15	26192692	26192715	GCTGACTCAGGGGCTAACAG	+	chr15	26192682	26192816	20	cell-type specific
chr15	26341029	26341052	CTCAGGGCAGCAGGGGGCGG	-	chr15	26340979	26341141	26	cell-type specific
chr15	28331315	28331338	GGTCCCTTTTCTGCAGGGCA	-	chr15	28331336	28331520	55	common
chr15	28331444	28331467	GTCAGTAATGAGCAGTAATG	+	chr15	28331336	28331520	55	common
chr15	29394592	29394614	CTTACTCACAGACCAGCAG	+	chr15	29394518	29394704	55	common
chr1	53387452	53387475	GCAACAGACGCTTGGCCCAT	-	chr1	53387362	53387538	49	common
chr15	35262019	35262042	CCGGAAGTTCATGCAGGCGT	+	chr15	35261983	35262165	55	common
chr15	37581500	37581523	GAGGCACTACTGGCATCTAG	-	chr15	37581431	37581565	35	common
chr1	53829159	53829182	TGTCACCACCCCCAGGCAGA	-	chr1	53829107	53829266	19	cell-type specific
chr1	53991499	53991521	GCATCCTCCACCTCCTCCC	+	chr1	53991394	53991528	9	cell-type specific
chr15	40322616	40322639	AGAAGCTGTCAGCCAGCACT	+	chr15	40322525	40322717	55	common
chr15	40567047	40567070	CCCTGCTGGCAGGTCAGCAC	+	chr15	40566954	40567209	53	common
chr1	54059944	54059966	GCAGCCTATGAGCAGCAGG	-	chr1	54059888	54060052	23	cell-type specific
chr15	40602341	40602364	GTAGAGGGCAACCCTGCAGT	+	chr15	40602339	40602519	55	common
chr15	40630383	40630406	GCCCTGGAAGCTGTGAGCAA	+	chr15	40630351	40630587	55	common
chr15	40714299	40714320	CCCCTGCCGGCTGCCCGC	+	chr15	40714200	40714427	53	common
chr15	41075091	41075114	CTCTGCCCAGCGCCTGTCCT	-	chr15	41074924	41075154	53	common
chr15	41151471	41151493	GAGGGAGTGCCCGAGGAGG	+	chr15	41151418	41151613	55	common
chr15	41198694	41198717	GTGCCCACTGCAGACTCGGC	-	chr15	41198625	41198811	54	common
chr15	41522984	41523007	GGCGCTGGGGAGCCGGCCTC	-	chr15	41522835	41523136	55	common
chr15	41849941	41849962	CCTCCTGCTGCCGCCTGG	+	chr15	41849851	41850051	55	common
chr15	42376689	42376712	GCACAGACCTGGGAGCAGGC	-	chr15	42376667	42376866	55	common
chr15	42376832	42376855	CAGGCAGCTAGCTCCTCCTT	-	chr15	42376667	42376866	55	common
chr15	42426280	42426303	TGGCCTGCAGGTGGCAGTGT	-	chr15	42426239	42426406	55	common
chr15	42442404	42442425	GGCAGCAAGGGCTGCAGG	-	chr15	42442298	42442459	10	cell-type specific
chr15	42442404	42442426	GGGCAGCAAGGGCTGCAGG	-	chr15	42442298	42442459	10	cell-type specific
chr15	43478086	43478109	GGCAAGGGGAGCCCGGAAGG	-	chr15	43478021	43478173	54	common
chr15	43668402	43668425	CACGGGCCATGTGCAACAGC	+	chr15	43668357	43668560	55	common
chr15	43668405	43668428	GGGCCATGTGCAACAGCAGG	+	chr15	43668357	43668560	55	common
chr15	43668406	43668429	GGCCATGTGCAACAGCAGGT	+	chr15	43668357	43668560	55	common
chr15	44828782	44828805	CCGCCTGTGGGGTCGGTGGC	-	chr15	44828747	44828979	49	common
chr15	45077026	45077047	CGGCGTCTTCCCAGGCGC	+	chr15	45076967	45077155	53	common
chr15	45145686	45145707	GCAGCTTTGCTGTGTGGT	-	chr15	45145617	45145828	55	common
chr15	45145716	45145739	CACAGCACCCTCTAGTGTCT	-	chr15	45145617	45145828	55	common
chr15	45418902	45418925	GAATGAGTTCCTCTCCCCAC	+	chr15	45418854	45418988	55	common
chr15	45459724	45459747	CGGGGACGGAGGCAGAGAGG	+	chr15	45459670	45459842	55	common
chr15	45927717	45927740	CTCTGTCCCACGCGCAGTGT	-	chr15	45927651	45927814	52	common
chr15	49338789	49338812	AGGAGGCAGAGAGGGGCAGT	+	chr15	49338763	49338965	50	common
chr1	54985491	54985515	CAACAACCTGGAAGCTTTCCC	+	chr1	54985492	54985650	38	common
chr15	50296227	50296250	CTGGGGAGATGGGCGGAGGT	-	chr15	50295990	50296229	55	common
chr15	50554350	50554373	GGAGCCAGACAGGCAATGCT	+	chr15	50554342	50554476	17	cell-type specific
chr1	55137970	55137993	CCCTGAAGCCAGTGGTCCTT	-	chr1	55137796	55137978	55	common
chr15	51573766	51573789	TAGGGCTCAGCTGAAGAAGG	-	chr15	51573638	51573831	55	common
chr15	52019880	52019903	TCCACAGGCAGTGAAGGGCT	+	chr15	52019820	52019956	32	cell-type specific
chr1	55267291	55267314	CTCAGCTCAAGCAGACAGGG	-	chr1	55267197	55267357	46	common
chr1	55476622	55476644	GTGAGGCCTTACGCCTGAC	+	chr1	55476545	55476768	10	cell-type specific
chr15	56285820	56285842	GAGGAGAAGCGGGAGGAGG	+	chr15	56285789	56285987	52	common
chr1	5570053	5570076	GTCACAGGTACAGCCTCCTG	+	chr1	5570014	5570221	55	common
chr1	5574774	5574796	TGGCCATTAGTGGAATTGC	-	chr1	5574678	5574922	55	common
chr15	59793881	59793904	GGCAGAGTGACTCTATTGCT	-	chr15	59793812	59793946	55	common
chr15	62533602	62533625	AGACAGGCAAGGGAGGCAGG	+	chr15	62533477	62533642	47	common
chr15	62841718	62841741	GGCACATAGCAGGAACTCAC	-	chr15	62841698	62841866	55	common
chr15	63753729	63753751	GAGAAAGGCTCCATTCACC	-	chr15	63753635	63753769	6	cell-type specific
chr15	63779631	63779654	CAATTGCATGGACTCTCACT	+	chr15	63779556	63779789	55	common
chr15	64359852	64359875	CAGGGCAGCTGATGCCAAGT	+	chr15	64359804	64359977	55	common
chr15	64445950	64445973	GCCAGACAGGCCCAGGCAGC	-	chr15	64445813	64446058	54	common
chr15	65325571	65325594	GTCACGCTCAGTGACGGGAC	-	chr15	65325467	65325713	51	common
chr15	65378909	65378932	TTCAGTCAGACCCAGGGCTG	-	chr15	65378702	65378952	52	common
chr15	65693214	65693237	GACACCACTGTGGTGTTCTC	+	chr15	65693165	65693382	55	common
chr15	65693265	65693288	CTGGTGGACGCCAGGGACCC	+	chr15	65693165	65693382	55	common
chr15	65888466	65888489	GGGATGTTCAGGTCACCAGG	+	chr15	65888390	65888554	49	common
chr15	66155120	66155143	GGCCAGTTCACTCCTCTAGG	+	chr15	66155067	66155202	53	common
chr15	66209037	66209060	GTCAGGTACCACCAGTCCTG	+	chr15	66209040	66209215	54	common
chr15	66209064	66209087	CTGCATTCCTCCCTCCCTGC	+	chr15	66209040	66209215	54	common
chr15	66373488	66373511	TAGGGAGGCAGGGCATGAGG	-	chr15	66373502	66373689	28	cell-type specific
chr15	66790222	66790245	GTAGCCTGGCCACTCCGCGG	+	chr15	66790087	66790325	55	common
chr15	68346945	68346968	GGAAGAGATAGGGAGTCCGG	+	chr15	68346826	68347042	14	cell-type specific
chr15	68852078	68852101	AGCTGCACGTGGAGCGGTCT	-	chr15	68851979	68852226	54	common
chr1	56900480	56900502	GGAGAAGTGAGGAGAGCAG	+	chr1	56900435	56900570	18	cell-type specific
chr15	69768230	69768253	CTTTCACCCCACTGGAAAGC	-	chr15	69768189	69768372	54	common
chr15	70780567	70780590	CTTGAACTGCATGGCCAACC	+	chr15	70780452	70780655	54	common
chr15	70861719	70861742	GCGCTGTCCTTCTGAGAGTC	-	chr15	70861576	70861762	50	common
chr15	70877732	70877755	GTCCACGCTCGGTCCGCAGG	-	chr15	70877637	70877859	30	cell-type specific
chr15	72023024	72023047	CCGGGGTGGCTCTGTCCAGG	+	chr15	72022981	72023150	55	common
chr15	72492238	72492261	GGCCTTCCTCCTGTTTGCCT	-	chr15	72492114	72492289	55	common
chr15	72963320	72963343	CTCAGCCTCGAGGAGCCTGC	-	chr15	72963252	72963470	55	common
chr15	74200830	74200853	GCTAGGTTGGAGAGGGCTGC	-	chr15	74200728	74200931	55	common
chr15	74243548	74243571	AGGCGCCTGGAGCAGCCAGG	+	chr15	74243520	74243741	54	common
chr15	74243623	74243645	GGGGGCCTGTGGGCAGCAG	+	chr15	74243520	74243741	54	common
chr15	74243624	74243645	GGGGCCTGTGGGCAGCAG	+	chr15	74243520	74243741	54	common
chr15	74257201	74257224	GCGTGGTCTTGCCCTCCTCC	+	chr15	74257135	74257376	54	common
chr15	74346523	74346546	GCCACCTGCAGGTTACATGG	-	chr15	74346495	74346697	52	common
chr15	74674955	74674978	CTGCCCTGGGACCTTGGGAT	-	chr15	74674807	74674998	54	common
chr15	75127848	75127871	CCGGGTTGCTCAGTCATCCC	-	chr15	75127692	75128006	55	common
chr15	75127900	75127923	CACATCCCCTGGCAGCCAGC	-	chr15	75127692	75128006	55	common
chr15	75660390	75660413	GTAGGTAACGCCCAGCGGGT	-	chr15	75660161	75660425	55	common
chr15	75978634	75978657	CCTGAACGGATCCTGAGCAG	-	chr15	75978608	75978828	54	common
chr15	75978634	75978658	GCCTGAACGGATCCTGAGCAG	-	chr15	75978608	75978828	54	common
chr15	75978736	75978758	GGCGGCTGTGCCTCCAGGA	-	chr15	75978608	75978828	54	common
chr15	76013583	76013606	CGACGCCCGCCACCTGCAGG	-	chr15	76013489	76013695	39	common
chr15	76078647	76078670	GAGGACACGGCTCAGACGCT	-	chr15	76078515	76078729	16	cell-type specific
chr15	76078648	76078670	GAGGACACGGCTCAGACGC	-	chr15	76078515	76078729	16	cell-type specific
chr15	76078648	76078671	AGAGGACACGGCTCAGACGC	-	chr15	76078515	76078729	16	cell-type specific
chr15	76483244	76483267	AGAAGCGGTGCGAGGCGTGC	+	chr15	76483177	76483369	55	common
chr15	77876731	77876755	CCAGTGCATAGGGCAGCTCGG	+	chr15	77876681	77876865	38	common
chr15	78195425	78195448	TGCTCCGGGAGCCCAGTGCT	+	chr15	78195282	78195493	54	common
chr15	78203160	78203183	GCAATCCACCAGGTGTCACC	+	chr15	78202880	78203267	46	common
chr15	78251841	78251864	GCCAAGTCCAAGTCTGTCCA	+	chr15	78251782	78252002	55	common
chr15	78251956	78251977	CTCGGGCAGGGTGGGGTA	+	chr15	78251782	78252002	55	common
chr15	79032980	79033003	GCTGCACCGGCTCCACACGG	-	chr15	79032896	79033079	52	common
chr15	79033049	79033073	GTCCCTGAGGAGCATCAGCCA	-	chr15	79032896	79033079	52	common
chr15	79888651	79888674	CAGAAGTCTAGGTGAAGCTG	-	chr15	79888442	79888694	55	common
chr15	80189109	80189132	GTCCGTGCTGGCGCTGGGCT	-	chr15	80188905	80189212	54	common
chr15	80285848	80285871	GGCTTGGCAGACTATCACGT	+	chr15	80285795	80286014	54	common
chr15	80952558	80952581	CAGACACCTGCCTCTGGATC	+	chr15	80952543	80952715	33	cell-type specific
chr15	81567494	81567517	GAGGAAAAGGAAGGCAAACC	+	chr15	81567457	81567648	55	common
chr15	84049577	84049600	CACAGCAGCAGACCTGGATG	+	chr15	84049492	84049668	53	common
chr1	58513067	58513090	TGTGAAGTGTGGCACCAGGG	+	chr1	58513044	58513234	55	common
chr15	85369671	85369694	CTCACAATGGGATGTGTGCC	+	chr15	85369622	85370002	49	common
chr1	5890931	5890954	CACCCCTCCCTCGCTGGCCC	+	chr1	5890905	5891076	23	cell-type specific
chr1	5891037	5891060	GTTCAGCGCATGGCTCTTGG	-	chr1	5890905	5891076	23	cell-type specific
chr15	89422037	89422060	CTCAACCAGATGCTGCTTCT	+	chr15	89422002	89422219	55	common
chr15	89974152	89974175	GCAGGAGTAGGCGGCAGAGG	+	chr15	89974004	89974209	55	common
chr15	90039560	90039581	CTCCGCTGGGCCTGCAGG	+	chr15	90039519	90039676	29	cell-type specific
chr15	90190567	90190590	GGGACAGGAGGGGCAGCAGC	-	chr15	90190404	90190621	55	common
chr15	90190577	90190600	GACGGGAGAGGGGACAGGAG	-	chr15	90190404	90190621	55	common
chr15	90319965	90319988	GGCCGATGTAGCGGATGGCC	-	chr15	90319911	90320064	35	common
chr15	90701325	90701348	GAGGAATGCCCTCTTGGCCA	+	chr15	90701151	90701381	55	common
chr15	90836785	90836808	CGTACTGCTTCAGGTGACCC	-	chr15	90836601	90836920	55	common
chr15	90836809	90836832	GGCCACTTATCAGCAGCAGG	+	chr15	90836601	90836920	55	common
chr15	91445653	91445676	GCCTCACCCGGCTCCGGCCC	-	chr15	91445506	91445698	55	common
chr15	91576476	91576499	GCTGCAGGTGACCCAGGTAC	+	chr15	91576415	91576658	54	common
chr15	91576548	91576571	GCAGGAAGTCCCTGGGCATG	+	chr15	91576415	91576658	54	common
chr1	59250914	59250937	CTGCACTCCCGGCCGGGTGG	+	chr1	59250887	59251021	55	common
chr15	93352416	93352437	CGCGGACGTGCTGCAGGC	+	chr15	93352351	93352593	55	common
chr15	93352416	93352438	CGCGGACGTGCTGCAGGCA	+	chr15	93352351	93352593	55	common
chr15	93352445	93352467	TGGCGGAGGAAGGCGGGGC	+	chr15	93352351	93352593	55	common
chr1	6009630	6009653	CTGAGCACCCGGGAGGAACG	+	chr1	6009626	6009815	28	cell-type specific
chr1	6035360	6035383	GAACACGCTGCTCAACAGCT	+	chr1	6035322	6035528	55	common
chr1	6035398	6035421	GCAGAGGCCAGTGGTGCCCC	-	chr1	6035322	6035528	55	common
chr1	6035423	6035446	GCAGCTGCTATGCCCCGTGT	-	chr1	6035322	6035528	55	common
chr1	6035488	6035511	CCAGGGCACTTTCAGCTGTG	-	chr1	6035322	6035528	55	common
chr1	6101629	6101651	CTGGCATGGAAGGAGCCCT	+	chr1	6101592	6101768	52	common
chr1	6101743	6101765	GCCCTGAGCAGGCGACTGG	+	chr1	6101592	6101768	52	common
chr16	10350772	10350795	GTTGGGGCAGGTGAAGGGGA	+	chr16	10350693	10350950	54	common
chr16	10350829	10350852	TGGCGCCTCCTGGTGGCCTC	-	chr16	10350693	10350950	54	common
chr16	10762471	10762492	GGCCTGGGCAGGAAGGCC	-	chr16	10762339	10762530	54	common
chr16	11057986	11058009	GTGGCATTCCTCTGGCCAAG	+	chr16	11057945	11058161	55	common
chr16	11077203	11077226	CTCTCTACTGCCCTCACCTG	-	chr16	11077146	11077280	40	common
chr16	11082514	11082537	GTTCCATGTTCCACCTCCAG	+	chr16	11082452	11082586	51	common
chr16	11349703	11349726	CGGATCCCAGCCTGGCCAGC	-	chr16	11349634	11349822	54	common
chr16	11465783	11465806	GGAATCTGCTCACCGATAGG	-	chr16	11465682	11465905	54	common
chr16	11480938	11480961	AGGGCGGCACAGCCCGGGGC	+	chr16	11480880	11481096	47	common
chr16	11490290	11490314	TGCGGTTCCTCCCTGGCCAGC	-	chr16	11490144	11490368	54	common
chr16	11490293	11490316	GCTGGCCAGGGAGGAACCGC	+	chr16	11490144	11490368	54	common
chr16	1234622	1234645	GCCAGGAGTTGTCACGTGGC	+	chr16	1234572	1234706	12	cell-type specific
chr16	12354729	12354752	TCTGTGCATGCGTCCCCAGC	+	chr16	12354601	12354814	16	cell-type specific
chr16	12549258	12549280	GCTTGGCCAGCACCCGCCG	+	chr16	12549183	12549395	55	common
chr16	12549310	12549333	CTGGGAGCCAGAGTGGCAGC	-	chr16	12549183	12549395	55	common
chr16	12562603	12562626	GAACACGCAGTTCTGCCTGG	+	chr16	12562484	12562666	26	cell-type specific
chr16	1388378	1388401	GGGCACCTGGTCAGGCGGTG	-	chr16	1388215	1388419	52	common
chr16	14013696	14013719	CTGCAAGCTACACCGACAGG	+	chr16	14013320	14013841	55	common
chr1	6140792	6140815	CATGCCCAAATGCTGCACGT	-	chr1	6140736	6140890	32	cell-type specific
chr16	1413598	1413620	GCCACAGGGGGGAGCTGCT	+	chr16	1413497	1413704	55	common
chr16	1413624	1413645	CCGTGGAGGCTGAGGTGG	-	chr16	1413497	1413704	55	common
chr16	1413624	1413646	CCCGTGGAGGCTGAGGTGG	-	chr16	1413497	1413704	55	common
chr16	1413624	1413646	CCTCCACCTCAGCCTCCAC	+	chr16	1413497	1413704	55	common
chr16	1413624	1413647	CCCCGTGGAGGCTGAGGTGG	-	chr16	1413497	1413704	55	common
chr16	14393562	14393585	CACCGCGACAGAGCGAGGCT	-	chr16	14393361	14393611	14	cell-type specific
chr16	147052	147075	TGGCCACCAGGGGGCAGCAG	-	chr16	146973	147205	54	common
chr16	147079	147102	GTGCACACCGCCACCAGACG	+	chr16	146973	147205	54	common
chr16	147105	147129	GGAGCAGGTGGTGCCTGTGGG	-	chr16	146973	147205	54	common
chr16	15644780	15644803	GTTGGCATCAGCTTGAGAGG	+	chr16	15644763	15644980	54	common
chr16	157240	157263	GTGTGATCTGCAGGCTGCGG	-	chr16	157118	157312	55	common
chr16	16288937	16288960	GTTTTTCCAAGCCCTGCTGT	-	chr16	16288773	16289026	55	common
chr1	6165828	6165851	GGGCTATTGGCCAGGAGAGG	-	chr1	6165841	6166024	15	cell-type specific
chr1	6165874	6165898	CTGGTCCTGGGCAGGAAGTGA	+	chr1	6165841	6166024	15	cell-type specific
chr16	167978	168001	GTAGACAGGAGTGGCAGTCA	-	chr16	167821	168078	55	common
chr1	6168966	6168989	TGGAGGCATGGAGGGATGGA	+	chr1	6168988	6169164	55	common
chr1	6169105	6169128	CTGCAGGCAGCACTGCCAAG	+	chr1	6168988	6169164	55	common
chr16	18015590	18015613	TGGGAGGGAAGCCCAGCAGG	+	chr16	18015539	18015747	53	common
chr16	1823464	1823487	CGTGGACACAGGTGCGGCGG	+	chr16	1823403	1823619	55	common
chr16	1823487	1823510	GCACGGGCGATACTCGGGGT	+	chr16	1823403	1823619	55	common
chr16	1874054	1874077	GCTGTAACTGCATGGAACGC	-	chr16	1873933	1874079	44	common
chr16	19897745	19897768	AGTGGATGGGCACTGTCACC	+	chr16	19897648	19897880	53	common
chr16	2033578	2033600	CGGCGCGGCCGCAGAGGGT	-	chr16	2033462	2033600	30	cell-type specific
chr1	62107622	62107646	TCGGCGTCTGCAGGAACCCGG	+	chr1	62107452	62107680	51	common
chr16	21095325	21095348	GAGGAAGGGAGCGGGCAGTA	-	chr16	21095232	21095424	55	common
chr16	21566388	21566411	CGCATATCAGGAAGACACAG	+	chr16	21566233	21566458	55	common
chr16	22311917	22311939	CTTGGCAGCCGGTGCAGAT	+	chr16	22311854	22312066	55	common
chr16	22330180	22330202	GGAATCGATGGAGGGGCCC	-	chr16	22330114	22330313	55	common
chr1	6231754	6231777	CTCCCTATGGCTCCATCTGG	+	chr1	6231687	6231880	48	common
chr16	23193716	23193739	CGGGAGTGGAAGGAAGTCGC	+	chr16	23193711	23194056	54	common
chr16	23193717	23193738	GGGAGTGGAAGGAAGTCG	+	chr16	23193711	23194056	54	common
chr16	2328387	2328410	TCGTCCAGGAAGATGACAGC	+	chr16	2328370	2328527	27	cell-type specific
chr16	2328521	2328544	GCTGGGACACGGGCCTCCAC	-	chr16	2328370	2328527	27	cell-type specific
chr16	23446923	23446945	GGCGGACAGGAGCCAGAGG	-	chr16	23446824	23447053	55	common
chr16	24082404	24082427	CACATCAGCCCTGGAGTGGA	-	chr16	24082296	24082494	52	common
chr16	24510749	24510772	CCTCGCTGTTCCTTCTCCAC	-	chr16	24510629	24510767	53	common
chr16	25119482	25119505	GTTGTGTTGCTGCTGCCCCC	+	chr16	25119410	25119555	41	common
chr16	25236684	25236707	TCTCCCTCAACTTTGGGAGG	+	chr16	25236653	25236819	55	common
chr1	6265141	6265163	GTTTGGGTGGGAGGTTGAG	-	chr1	6265003	6265594	54	common
chr1	6265341	6265364	AACCAGCGAAAGGCAGGGCT	+	chr1	6265003	6265594	54	common
chr16	26776581	26776603	CACCACTGCACGAAAGGGC	+	chr16	26776541	26776685	43	common
chr16	27166484	27166507	TGCGTGTGCCCAGGCTGAGT	-	chr16	27166417	27166614	54	common
chr16	2731860	2731884	CGGTAATCCAAGCTACTCGGG	-	chr16	2731837	2732068	1	cell-type specific
chr16	27367117	27367140	GCTCCCTGTAGGCTGGAAGT	-	chr16	27367039	27367243	46	common
chr16	27379666	27379688	GGCCTGGACCTGGAGCTGC	-	chr16	27379516	27379699	54	common
chr16	27527351	27527374	AGTGGATGCACTTGGCCAGT	+	chr16	27527301	27527473	54	common
chr16	27527393	27527417	CTCCCCTGTGCTAGGTGCTGG	-	chr16	27527301	27527473	54	common
chr16	28328468	28328491	GTGCCACCAAGCGCAGGGTC	+	chr16	28328484	28328680	55	common
chr16	28328635	28328656	GGGCAGAGGGGCTGGAGG	+	chr16	28328484	28328680	55	common
chr16	28338366	28338389	TCCCCCACTTAGCCACAGAG	+	chr16	28338292	28338514	55	common
chr16	28502809	28502832	CGCGCATTGGAAGAACGCGG	-	chr16	28502766	28502961	41	common
chr16	2888977	2889000	CCTCCCTGCAAGTGTGGAGC	+	chr16	2888925	2889125	54	common
chr16	28956997	28957020	CTGGGAAGTCGGTGGAGTCC	+	chr16	28956877	28957233	54	common
chr16	28957066	28957089	TCCGCCAAGGTCAGGACTGC	-	chr16	28956877	28957233	54	common
chr16	28957082	28957105	TGGCGGAGTCTGCACGGGGA	+	chr16	28956877	28957233	54	common
chr16	28957107	28957130	AATGCATGCTGGTCCAGCGG	+	chr16	28956877	28957233	54	common
chr16	28957127	28957150	GGGGCGCCTGCAGGGGACAT	+	chr16	28956877	28957233	54	common
chr16	28957228	28957251	GCGAGTTTTGTGAGCACCGT	+	chr16	28956877	28957233	54	common
chr16	28989159	28989182	GTTCCAGCTGGGGTGGGAGT	+	chr16	28989135	28989305	53	common
chr16	28989271	28989294	TCCGATTGTACCTGTCACCC	-	chr16	28989135	28989305	53	common
chr16	28989290	28989313	CGGAAGTATCTCATGTGCGG	+	chr16	28989135	28989305	53	common
chr16	29712021	29712044	TCGGAATCCGGAAAGGGAGC	-	chr16	29711868	29712097	55	common
chr16	29860025	29860048	GACACGTCTGCTGGTGCTGT	-	chr16	29859917	29860140	55	common
chr1	6298828	6298851	GGGAGATGTCCTGAGTCTGT	-	chr1	6298759	6299071	55	common
chr1	6298848	6298871	CTGAGGTGTCCTGGAGCAGA	-	chr1	6298759	6299071	55	common
chr16	30016991	30017014	CGGGAGCATCTGCCACCTGC	+	chr16	30016907	30017134	54	common
chr16	30033030	30033052	GGCCGCTGCTGCCACCTAG	+	chr16	30032942	30033162	55	common
chr16	30033095	30033118	CCCGGCTGAGCACTAAGGAG	+	chr16	30032942	30033162	55	common
chr16	30080304	30080327	GTTGCCTATTGAGGACCTGC	-	chr16	30080237	30080384	53	common
chr16	30123573	30123596	CCGGGGGCGTGAGAGAGGCC	-	chr16	30123500	30123698	28	cell-type specific
chr16	30198739	30198760	GTGCAGTGTTCGTGTCGG	+	chr16	30198697	30198895	54	common
chr16	30198739	30198762	GTGCAGTGTTCGTGTCGGAG	+	chr16	30198697	30198895	54	common
chr16	30347174	30347197	GTGACTTCAGGAGCCCTGGT	+	chr16	30347108	30347250	0	cell-type specific
chr16	30441580	30441603	AGACGAAGGGCAGAGGGTGG	+	chr16	30441521	30441893	55	common
chr16	30461272	30461295	CTGTCACCCTCCGCCCTGTG	+	chr16	30461191	30461372	54	common
chr1	6305185	6305208	CAGGGGAGCCGAGCAACCGT	+	chr1	6305198	6305394	55	common
chr1	6305345	6305368	GTGCAAGGGCGGAACAGCGC	-	chr1	6305198	6305394	55	common
chr1	6305369	6305392	GGAGCAGGAGCCCAGACGGC	-	chr1	6305198	6305394	55	common
chr16	30626781	30626804	CTCACCCAAGTGCATGTGCC	+	chr16	30626780	30627006	51	common
chr16	30626800	30626822	CTGGTGGTGGCCACAAGGG	+	chr16	30626780	30627006	51	common
chr16	30626800	30626824	CTGGTGGTGGCCACAAGGGAG	+	chr16	30626780	30627006	51	common
chr16	30626839	30626862	TGCGGATGTGTGCACAGATG	-	chr16	30626780	30627006	51	common
chr16	30626940	30626963	GGGGCAGCTGGTGCTGGACC	+	chr16	30626780	30627006	51	common
chr16	30669467	30669490	CTCCTGATGGCGTCGAGGCG	-	chr16	30669340	30669537	55	common
chr16	3068233	3068256	GGACCACCGCCCCGGAGGAG	+	chr16	3068229	3068374	40	common
chr1	6306892	6306915	CGGTCTGCTTCCCGCGGTGT	+	chr1	6306823	6307042	55	common
chr1	6306998	6307021	CTCCAGGGCGGGCGCGCGGG	+	chr1	6306823	6307042	55	common
chr16	30705399	30705421	CAGGAGGTGGCAGTGGAGA	-	chr16	30705299	30705514	55	common
chr16	30825698	30825721	GTCTTAGTTGTCTGGGCCGC	+	chr16	30825629	30825882	55	common
chr16	30825700	30825723	CTTAGTTGTCTGGGCCGCTG	+	chr16	30825629	30825882	55	common
chr16	30825726	30825749	GCCGTGGCTCCTGCCCGTGG	-	chr16	30825629	30825882	55	common
chr16	30825730	30825753	CACGGGCAGGAGCCACGGCC	+	chr16	30825629	30825882	55	common
chr16	30953346	30953368	GGGGTGCACCCTTGGAGCT	+	chr16	30953321	30953548	55	common
chr16	30953535	30953558	CACCTGTCCAGCTGAGGTCC	-	chr16	30953321	30953548	55	common
chr16	30965082	30965105	GTCTGTCTTGTGTGCCACCA	-	chr16	30965074	30965246	55	common
chr16	30965177	30965200	GCAGTGCTTGCAGTGAGCGG	-	chr16	30965074	30965246	55	common
chr16	31037301	31037324	GTGGCAGAGACCTGAGACGG	+	chr16	31037302	31037450	20	cell-type specific
chr16	3109056	3109080	GCTCCTCTTGCCCCTGCTGGT	+	chr16	3108793	3109474	55	common
chr16	3109296	3109319	CTCCTCAGGGTCTGAGACCC	+	chr16	3108793	3109474	55	common
chr16	3109315	3109338	GCGGGTTCCGGTGGCAGCGC	-	chr16	3108793	3109474	55	common
chr16	31489396	31489419	GTGGCTACCTGCAAGGGCTG	-	chr16	31489282	31489495	15	cell-type specific
chr16	32909302	32909325	GGGGCGCTCAAACCACCAGG	+	chr16	32909209	32909411	27	cell-type specific
chr16	32951292	32951315	GACCACGGCTGTTGGCATCC	-	chr16	32951253	32951432	7	cell-type specific
chr16	32951298	32951322	TGCCAACAGCCGTGGTCCTGT	+	chr16	32951253	32951432	7	cell-type specific
chr16	32951299	32951322	GCCAACAGCCGTGGTCCTGT	+	chr16	32951253	32951432	7	cell-type specific
chr16	33293937	33293959	GTGGCTTGGCTGCCTTGGC	+	chr16	33293902	33294147	0	cell-type specific
chr16	33605676	33605699	GCAAGAGACACAGTGAGGGG	+	chr16	33605690	33605838	31	cell-type specific
chr16	33618956	33618977	GCTGCTCACAACCACCAG	+	chr16	33618868	33619432	52	common
chr16	33618974	33618996	GGGGCGCTCAGGACACGAG	+	chr16	33618868	33619432	52	common
chr16	33618974	33618997	GGGGCGCTCAGGACACGAGG	+	chr16	33618868	33619432	52	common
chr16	33619203	33619226	AGGGGGCGCTGAGGACACCA	+	chr16	33618868	33619432	52	common
chr1	6340966	6340989	GATCCGGTGAGGCCTTGAGA	-	chr1	6340976	6341160	34	common
chr1	6341036	6341059	CTGTCAGTAGGGGTCAGAGT	-	chr1	6340976	6341160	34	common
chr1	6341110	6341133	CCTCCCTGCCAGGCAGCCCT	-	chr1	6340976	6341160	34	common
chr16	3508103	3508125	GCGAAGGGAGCCGGGAAGT	-	chr16	3508018	3508152	49	common
chr16	3550893	3550915	TGCATACGCACGGGGAGAG	-	chr16	3550770	3551006	55	common
chr16	368919	368942	CTCTGACCCCTGGCTGTGTG	+	chr16	368704	369003	39	common
chr16	3704390	3704413	TGGCGATGAATCAGGAAGGC	+	chr16	3704363	3704555	55	common
chr16	3704401	3704424	CAGGAAGGCAGGCGTGTCCT	+	chr16	3704363	3704555	55	common
chr1	6408157	6408179	CCTCTGGTGGCTGTGGGGA	-	chr1	6408077	6408271	55	common
chr1	6408206	6408229	ATTCTTTGGACCCGAGGCTC	-	chr1	6408077	6408271	55	common
chr1	6408237	6408259	GGGCTCGCTGGCTGGGCTG	-	chr1	6408077	6408271	55	common
chr16	412309	412332	GCAAGAGGGCACTGCAGCCC	-	chr16	412259	412449	55	common
chr16	4311784	4311807	CTCGGTGCGCATGATGCTGG	-	chr16	4311652	4311827	55	common
chr16	4359973	4359996	GCTTCTCATTCCCTGCCCCA	-	chr16	4359800	4359988	53	common
chr16	4380494	4380517	TCGCAAGCCAGGGAGCCCCA	-	chr16	4380360	4380590	55	common
chr1	6438369	6438392	CTGGACCATCTGCCGCAGTC	-	chr1	6438258	6438472	26	cell-type specific
chr16	4409267	4409290	TCGGGGACGAGGCGCCAGGG	+	chr16	4409109	4409349	55	common
chr16	4454682	4454705	CGTGGCGGTCCTGAGGCAGT	-	chr16	4454482	4454709	54	common
chr1	6464922	6464945	GGGCGCGGGACCCAGCGCTT	-	chr1	6464813	6465027	55	common
chr1	6464955	6464978	CCCACCTGGGCGTCATCTCT	+	chr1	6464813	6465027	55	common
chr16	47071887	47071910	GCTCGGCCCTCCTCCTGCGG	-	chr16	47071645	47071975	55	common
chr16	47175786	47175809	TCTGCCTTTGCCTTTCCCGT	-	chr16	47175667	47175889	55	common
chr16	47175828	47175851	GCTGGTAGCGCCTCCTCCAA	-	chr16	47175667	47175889	55	common
chr16	48075925	48075948	GTCAGCCAGTGCTGAGGACT	+	chr16	48075876	48076022	27	cell-type specific
chr16	48151613	48151636	GATGGCCTCCTGGGGGTCAC	+	chr16	48151423	48151732	55	common
chr16	48151632	48151655	CAGGGCTGAAGCAGGACCGT	+	chr16	48151423	48151732	55	common
chr16	48291718	48291741	CCAGAGAGCCCCCTGGCTGT	+	chr16	48291623	48291861	37	common
chr1	6483755	6483776	GCCCCTTCCAGGAACAGT	-	chr1	6483549	6483800	55	common
chr1	6483755	6483778	AAGCCCCTTCCAGGAACAGT	-	chr1	6483549	6483800	55	common
chr16	48387672	48387695	GGAACAGGGCAGAGCGATGT	-	chr16	48387554	48387753	55	common
chr16	49441980	49442002	GAAGGGGAAGGGCAAGAGG	-	chr16	49441893	49442091	55	common
chr16	49441980	49442003	GGAAGGGGAAGGGCAAGAGG	-	chr16	49441893	49442091	55	common
chr1	6498213	6498236	CCCAACCTGGAGCTTCTCCT	+	chr1	6498160	6498372	54	common
chr16	4986691	4986714	TAGGGCACGGGCAGCTGAGC	-	chr16	4986563	4986778	35	common
chr16	49985605	49985628	CAGGCAGGGGCCTTCAAGGA	+	chr16	49985583	49985721	3	cell-type specific
chr16	50058857	50058880	AAGAACCAAGCGGGGAACGG	+	chr16	50058802	50059057	55	common
chr1	6500948	6500970	CCCAGCTCGCGGCCGCGGC	+	chr1	6500876	6501010	29	cell-type specific
chr16	50244614	50244637	TCAGAGCCTGCCCTCTGCTG	+	chr16	50244532	50244751	55	common
chr16	50361129	50361152	GTGTGCACAGCTCCCTCTGT	-	chr16	50361050	50361184	54	common
chr16	50408707	50408729	GGGAGGCAGGAGGAGAAGC	+	chr16	50408664	50408852	47	common
chr16	50408714	50408737	AGGAGGAGAAGCAGGAGAGT	+	chr16	50408664	50408852	47	common
chr1	6505266	6505289	CGATCGCCTCGGCAGACTGC	+	chr1	6505257	6505437	44	common
chr1	6505317	6505340	GTGGACGGACGCCCATGCTC	-	chr1	6505257	6505437	44	common
chr1	6505369	6505392	GTGGCCTCCAGACCTGGCAG	+	chr1	6505257	6505437	44	common
chr16	5061036	5061059	CTCCAGAGGACAGGTCAAGG	-	chr16	5060936	5061185	17	cell-type specific
chr16	50918614	50918637	GCTGCTTCACGCTTGCCCCC	+	chr16	50918421	50918666	13	cell-type specific
chr16	52225627	52225650	CTGCCCTCTAGTGGTGCTGC	-	chr16	52225530	52225711	55	common
chr1	6524761	6524783	CCAGCCTCCCAGGTGGCGC	-	chr1	6524677	6524873	19	cell-type specific
chr16	52583002	52583025	TTCCCATTCTTGCAGCTAGC	-	chr16	52582937	52583095	19	cell-type specific
chr1	65327363	65327386	GAGACAAGCCACTCGGCAGG	+	chr1	65327327	65327501	33	cell-type specific
chr1	6535792	6535815	TAGGATCCCAAGCACCCTGG	+	chr1	6535648	6535870	55	common
chr1	6535808	6535830	CTGGAGGCTGGCCCAGGCT	+	chr1	6535648	6535870	55	common
chr1	6535833	6535856	GCTGTCCTGACTCCGGGAAG	-	chr1	6535648	6535870	55	common
chr16	53581017	53581040	CCGCCTTCCCTGTGTGTCTG	-	chr16	53580904	53581078	42	common
chr16	53581018	53581041	CCCGCCTTCCCTGTGTGTCT	-	chr16	53580904	53581078	42	common
chr16	53581019	53581041	CCCGCCTTCCCTGTGTGTC	-	chr16	53580904	53581078	42	common
chr16	54210467	54210490	GCCTAACCAAACACACATGC	-	chr16	54210357	54210606	6	cell-type specific
chr1	6546648	6546671	CCCACATGGCACAGCAGCCC	+	chr1	6546594	6546807	55	common
chr1	6546673	6546696	GGGACCTGGCCTAGAACTGC	-	chr1	6546594	6546807	55	common
chr1	6546685	6546707	GGCCAGGTCCCCACCGCCA	+	chr1	6546594	6546807	55	common
chr1	6546740	6546764	GGTGACTCCAGCACCAGAGTC	-	chr1	6546594	6546807	55	common
chr1	6550145	6550168	CCGGGACTGGCCAGATGGGG	+	chr1	6550017	6550221	55	common
chr16	55292104	55292127	GCCACACAAGGCTTGGCTGG	+	chr16	55292004	55292186	54	common
chr16	5540712	5540735	GTGGACCAGAGCAGCCGCGT	+	chr16	5540685	5540858	52	common
chr16	56611051	56611074	CAGAAGAGGGTGTGGTGAGG	+	chr16	56611002	56611199	55	common
chr16	56736171	56736194	GTGACTACGGACACTGAATT	-	chr16	56736058	56736243	55	common
chr16	56985308	56985331	GGGAGGGCTGCACAGAGTCC	+	chr16	56985305	56985489	55	common
chr16	57079918	57079941	GCAGTGGCAGCGGACAGGGT	+	chr16	57079755	57080029	53	common
chr16	57118278	57118301	CGACTTGGTTTTTCACAATG	-	chr16	57118214	57118422	55	common
chr16	57334565	57334587	TCTCGCTCCACCCAACGCC	-	chr16	57334512	57334766	53	common
chr1	6573466	6573489	TCAGCTTCTCCAAGGGGACC	-	chr1	6573434	6573610	5	cell-type specific
chr16	57553899	57553922	GCAGTGTGGGGGCTCAGAGC	-	chr16	57553717	57553975	55	common
chr16	57610547	57610569	GCCCCTCCAGCTGGTGCAT	-	chr16	57610340	57610603	55	common
chr16	57610547	57610570	GGCCCCTCCAGCTGGTGCAT	-	chr16	57610340	57610603	55	common
chr16	57625513	57625537	CACCCACAGGCGCTAGGATGA	-	chr16	57625344	57625590	54	common
chr16	57683090	57683113	TGGGTACTGGCTCCCCCTGG	+	chr16	57682998	57683256	53	common
chr16	57754355	57754378	GTCCATGCCCCAAGGCCAGC	-	chr16	57754265	57754481	55	common
chr16	57754472	57754495	GTAATGAGGGCTCTTGGGCC	-	chr16	57754265	57754481	55	common
chr16	58131321	58131344	CTGCACGGCCAGCTAGTGGA	+	chr16	58131203	58131435	55	common
chr16	58521741	58521763	CGCCACCGAGCTGGTGAGT	+	chr16	58521702	58521916	55	common
chr16	58529077	58529100	GAAGAGACGGGGCCTCTAGG	+	chr16	58529031	58529187	53	common
chr16	58768176	58768199	GGGCGAGCGGACACACACAC	+	chr16	58768171	58768405	54	common
chr1	6614088	6614111	CCCCGGGAGAGCTGCAGGGT	-	chr1	6614070	6614297	12	cell-type specific
chr1	6614155	6614176	GGTCGAGCAGGTAGGTGG	-	chr1	6614070	6614297	12	cell-type specific
chr16	62247936	62247958	GTGCTGTTGACACTGGGGC	+	chr16	62247760	62248005	31	cell-type specific
chr16	62745955	62745978	CCCCATCTCAAGGCGTGCAA	-	chr16	62745834	62745988	14	cell-type specific
chr16	63389997	63390020	GTCCGGACAGGGCCACTGGA	-	chr16	63389933	63390067	2	cell-type specific
chr16	66512682	66512705	CAGGGAGGATGGGCTGACAC	+	chr16	66512676	66512883	55	common
chr16	66623506	66623529	CTCACACTGCCTGGCCTGCA	-	chr16	66623381	66623622	52	common
chr16	66751053	66751075	GTCCCTCAGCGTCAAGCGC	+	chr16	66751022	66751212	48	common
chr16	66907205	66907226	GGGGACACGGCCAGCAGG	-	chr16	66907098	66907336	55	common
chr16	66962783	66962805	GTGGGAGCAATAGGAGTTG	+	chr16	66962773	66962931	53	common
chr16	67213428	67213451	GAGTGAGGACCTGCTGTCCC	-	chr16	67213382	67213527	21	cell-type specific
chr16	6732267	6732290	ACAGCCCTGCCTCCTCTGGA	+	chr16	6732245	6732631	50	common
chr16	67360817	67360840	TGACGCTGGAGCAGCCGGGT	+	chr16	67360697	67360940	41	common
chr16	67481675	67481698	CGCCCTTTGGTGCCACCTGC	+	chr16	67481623	67481811	54	common
chr16	67499851	67499874	CTCCACTTCTCAAGGAGCCT	-	chr16	67499780	67500024	55	common
chr16	67499878	67499901	CCACCACAAGGGGGTGCGCC	-	chr16	67499780	67500024	55	common
chr16	67499887	67499910	GCCATCCTCCCACCACAAGG	-	chr16	67499780	67500024	55	common
chr16	67499918	67499940	CAGCGAGGGGCCCCTCTGG	+	chr16	67499780	67500024	55	common
chr16	67555187	67555210	GCAGAGTCGGGTTCCGCCTG	+	chr16	67555011	67555235	54	common
chr16	67555528	67555550	GCTGGTTTGGGCAAGGGGT	-	chr16	67555468	67555693	55	common
chr16	67555614	67555637	CGACACTGGCCAGCCTCAGG	+	chr16	67555468	67555693	55	common
chr16	67581036	67581059	TGGAGCTTCTGCCCACCAGG	+	chr16	67580916	67581175	55	common
chr16	67701847	67701869	CTGCAGGAGGAGGAGCCAG	+	chr16	67701861	67702111	54	common
chr16	67702025	67702048	GCCCCACAGGCAGGGGGAGA	-	chr16	67701861	67702111	54	common
chr16	67962555	67962578	GCGCCATCTGGTGTCTGCAT	+	chr16	67962465	67962659	55	common
chr16	67962621	67962644	GGTGGGTGTGCACGATGGGC	-	chr16	67962465	67962659	55	common
chr16	67962638	67962661	TACAGGTGTGCACCATGGGT	-	chr16	67962465	67962659	55	common
chr16	67976185	67976208	GCAGGAGCCGCAATGAAGGC	+	chr16	67976090	67976266	55	common
chr16	68074713	68074736	GTTCTTACTGGGGGTGGCGG	+	chr16	68074525	68074744	55	common
chr16	68362640	68362663	GCACGCCTCCCAGGTTCGTG	+	chr16	68362578	68362804	55	common
chr16	68506663	68506685	GCCTGAGAGGTGGCAGAGG	-	chr16	68506574	68506733	2	cell-type specific
chr16	68554791	68554815	AGCGTCTGATACGCCGCGCCT	-	chr16	68554561	68554799	55	common
chr16	68738415	68738437	GTGAATGGTGCCCTCTGCT	-	chr16	68738296	68738528	55	common
chr16	68738465	68738488	GCAGACCTGGCGCTTGGGCT	-	chr16	68738296	68738528	55	common
chr16	68834423	68834446	CAAGGCTAGACAGGAGGATC	-	chr16	68834283	68834454	55	common
chr1	6694806	6694829	GACGCTGGACCTGCAGGAGC	+	chr1	6694754	6694970	53	common
chr16	698127	698150	CACCACTCGTCTAGGTCAAT	-	chr16	698088	698342	53	common
chr16	70804724	70804747	GGAGTCCCCTACGTTGATGG	-	chr16	70804686	70804864	15	cell-type specific
chr16	71513356	71513378	TGGGCATAAGGTTTGGGGC	-	chr16	71513366	71513575	51	common
chr16	71576426	71576449	GTTCCAGTGCCCCAGCGCTC	-	chr16	71576291	71576471	54	common
chr16	71598934	71598957	GTCGGCTGGGGGCTGCTGTG	+	chr16	71598919	71599088	37	common
chr16	72275971	72275994	CAGGGAGGAGAAGAGAAGGA	-	chr16	72275848	72276026	54	common
chr16	72866694	72866717	GACCGCCTAACCTGAGCATG	+	chr16	72866510	72866746	53	common
chr16	72890908	72890931	GCTGCATTTAGCTCCTGTGG	-	chr16	72890800	72890994	53	common
chr16	736226	736249	GAGGGACCTGCATGGGGTGC	-	chr16	736116	736268	51	common
chr16	74464074	74464097	GTGCTAATGTGTCCCGGCAC	+	chr16	74464092	74464318	49	common
chr16	74464075	74464098	TGCTAATGTGTCCCGGCACT	+	chr16	74464092	74464318	49	common
chr16	74808612	74808635	GAGGGCGAGAAGGAGGCGGC	+	chr16	74808535	74808886	38	common
chr16	74808683	74808705	GTGGCAGCAGAGCAGACGC	-	chr16	74808535	74808886	38	common
chr16	74847090	74847112	CTGGCTGTGACACCTGGGC	+	chr16	74847043	74847393	55	common
chr16	74847090	74847113	CTGGCTGTGACACCTGGGCT	+	chr16	74847043	74847393	55	common
chr16	75130809	75130832	CCGAGGACAGGCACCTGGCT	+	chr16	75130745	75130936	37	common
chr16	75267867	75267890	GTTTTCTGAGCCAGAAGCAC	+	chr16	75267812	75268032	55	common
chr16	75589793	75589816	GCAGGGCCACGAGCAGCACC	+	chr16	75589755	75589908	15	cell-type specific
chr1	6761916	6761939	ATCCGCGTCAGGGACAGCGC	+	chr1	6761839	6762126	55	common
chr16	76673988	76674011	TCCCAGGCCAGTGAGCAATG	+	chr16	76673980	76674114	43	common
chr16	78036988	78037011	CCGGGTACCAAGCTTGGACT	+	chr16	78036923	78037147	54	common
chr16	78269226	78269249	CCTTGCTGTTGTCTGGTGGA	+	chr16	78269196	78269399	53	common
chr16	78283126	78283149	GGTGTTGTGAATGTGAACCC	+	chr16	78283058	78283297	9	cell-type specific
chr16	783862	783885	CCTGAAGACACTCAGCCAGC	-	chr16	783779	783958	41	common
chr1	67955588	67955612	GATAACTGCAGGGTCTACAGG	-	chr1	67955464	67955598	42	common
chr16	80982915	80982938	CCAGCAGTGGTTCTCAACCA	+	chr16	80982848	80983073	52	common
chr16	81437199	81437222	TCTCACGGCAGGGGATCGGC	+	chr16	81437189	81437395	55	common
chr16	81462739	81462762	GTTTGTCTGCACTCTTTGCT	+	chr16	81462655	81462857	50	common
chr16	81616617	81616640	CCTCGCTTTAAGCAGATGGC	-	chr16	81616454	81616626	17	cell-type specific
chr16	81730999	81731022	TAGGGTGCAGCATCTGCCCT	-	chr16	81730937	81731126	54	common
chr16	81764020	81764043	CCTGTCTGCCCCTGGTGGCC	+	chr16	81763920	81764161	54	common
chr16	82263810	82263833	CTCTGCTGCCCTCTGCTGGG	+	chr16	82263710	82263944	55	common
chr16	82673405	82673428	GCCACAGAGCAGCGAGAGCA	+	chr16	82673406	82673631	55	common
chr16	83990424	83990446	GTCCGCTGCTAGCTGGTGT	+	chr16	83990432	83990639	54	common
chr16	84096570	84096593	GTAGGAAGCCTGGGAGGGGC	+	chr16	84096426	84096623	55	common
chr16	84118586	84118609	GTGCTGTCACCTTGTTAGTG	-	chr16	84118469	84118672	55	common
chr16	84118608	84118631	GTTGCTTCTCCAGTGGTTGC	-	chr16	84118469	84118672	55	common
chr16	84772188	84772211	GAGATGGGCTACACTAGCCT	-	chr16	84772172	84772395	54	common
chr16	84985980	84986003	CTCTGAGCAGCACCCTCTGG	+	chr16	84985919	84986130	54	common
chr16	84992866	84992888	TGGGGGGTGAATGGAGTGT	+	chr16	84992731	84992969	40	common
chr16	85120514	85120537	GCCACAGTGAGAGTTGCTGG	+	chr16	85120428	85120620	54	common
chr16	85279440	85279463	GAACTTTCCTGGTCCTCACT	+	chr16	85279293	85279505	55	common
chr16	85431307	85431330	GCAAAGGCGATGCAGGTGTG	-	chr16	85431213	85431405	30	cell-type specific
chr16	85855188	85855211	CGGGGCTCCAGGACAAGCGC	-	chr16	85855083	85855276	55	common
chr16	86077939	86077962	CCCAAAGCAGCCCTTACTGT	+	chr16	86077877	86078093	53	common
chr16	86077946	86077969	CAGCCCTTACTGTGGGATGG	+	chr16	86077877	86078093	53	common
chr16	8617922	8617945	GTTACTCACATGGCCACATG	-	chr16	8617702	8618020	54	common
chr16	8617944	8617967	CGGAAAGGCGCAAAAGGAGT	-	chr16	8617702	8618020	54	common
chr16	87358533	87358556	ACCGTGCCTCCTGCAAGGGG	+	chr16	87358377	87358553	55	common
chr16	87584234	87584257	GCAGGCGGGGAAACTGAGGC	+	chr16	87584054	87584288	55	common
chr16	87622552	87622575	CTTGGTCCGCGATCCTCTCT	+	chr16	87622438	87622637	46	common
chr16	87715935	87715958	GTGACAGGTATGGCAGAGAT	+	chr16	87715906	87716112	47	common
chr16	87715979	87716001	GTTTGCGCCCCCTAGGTGC	+	chr16	87715906	87716112	47	common
chr16	87811702	87811725	TGGAAACGCCGTGTGCACGT	-	chr16	87811566	87811781	55	common
chr16	87811703	87811725	TGGAAACGCCGTGTGCACG	-	chr16	87811566	87811781	55	common
chr16	87812831	87812854	GCGGCCGACGCAGACATTGC	-	chr16	87812737	87812953	54	common
chr16	87812868	87812891	TCCAAGGCCGCCTTCTGCGC	-	chr16	87812737	87812953	54	common
chr16	87849458	87849481	CACAGCTTGCCTTTGGTCAG	-	chr16	87849296	87849473	6	cell-type specific
chr16	87960890	87960912	GGGTGGAGGAGGGCGCTGT	+	chr16	87960876	87961010	14	cell-type specific
chr16	88503939	88503960	GGGCTGTGCACCGCCAGG	-	chr16	88503865	88504065	55	common
chr16	88571941	88571964	CCTGGGAGGCAGGGAGGAGG	+	chr16	88571834	88572251	47	common
chr16	88628476	88628499	GAACAGCGGCTGGGCGGAGT	+	chr16	88628443	88628628	53	common
chr16	88695222	88695244	TGGGCCGCTTGGCTGGAGG	-	chr16	88695183	88695350	51	common
chr16	88695222	88695246	GTTGGGCCGCTTGGCTGGAGG	-	chr16	88695183	88695350	51	common
chr16	88747660	88747684	AGCTGCACTGCCACCTGCAGG	-	chr16	88747576	88747770	49	common
chr16	88814488	88814511	GAGGAGGCCAAGCAGGACCA	-	chr16	88814356	88814621	50	common
chr16	88814504	88814527	CCCAGCAGAGGGCAGAGAGG	-	chr16	88814356	88814621	50	common
chr16	88898429	88898452	GGGAGCCTGCCCTCGCATGG	-	chr16	88898307	88898504	6	cell-type specific
chr16	88905605	88905629	CGGGCGGTGACCTGTGGACGT	-	chr16	88905502	88905742	17	cell-type specific
chr16	89283052	89283073	GTGCCCAGGAGGTGGCGG	-	chr16	89282987	89283150	55	common
chr16	89665984	89666007	GCGGCCACAGTGGGGCGCCA	+	chr16	89665903	89666111	52	common
chr16	89666031	89666054	GGGCAGGTCACTCGGTGAGC	+	chr16	89665903	89666111	52	common
chr16	8974198	8974221	GGAGTCCTCGCCCCATGGCA	+	chr16	8974186	8974429	55	common
chr16	89772513	89772536	GGGAGCTGCAGGCTCAGCGA	+	chr16	89772413	89772603	55	common
chr16	89859676	89859699	CTGCCGTCACCGCTAGACCA	+	chr16	89859638	89859800	31	cell-type specific
chr16	89927313	89927335	GTGGCCTGAGCGTCCGTCT	+	chr16	89927315	89927526	54	common
chr16	89927315	89927338	GGCCTGAGCGTCCGTCTGGG	+	chr16	89927315	89927526	54	common
chr16	89985082	89985105	CTGGTGACCAGGACAGACTG	+	chr16	89985081	89985272	50	common
chr16	89985143	89985165	GGCGGCGTGCAGGACCCAG	-	chr16	89985081	89985272	50	common
chr16	8999238	8999261	CAACGCTGCCTTCTAGTGTT	-	chr16	8999141	8999327	52	common
chr16	9029958	9029981	GTCCATGTCCTGCCACCAGG	+	chr16	9029878	9030043	36	common
chr16	9030481	9030504	TCTGCAGTGGCCTCTGCTGG	+	chr16	9030395	9030604	55	common
chr16	9233013	9233036	GCTGCGTCTACGCCAGGGAC	-	chr16	9232958	9233192	55	common
chr16	9233104	9233127	CAGGGAGCGCTGCCTGGATG	+	chr16	9232958	9233192	55	common
chr16	9254211	9254233	CTCCTGTCTGGGCGGCAGC	-	chr16	9254049	9254262	55	common
chr17	10231101	10231124	GGAACATTGAGGGCGCCATC	-	chr17	10230966	10231182	55	common
chr1	7103145	7103168	GTCCTGCCAGGCTCCACAGC	-	chr1	7102911	7103212	53	common
chr17	10640627	10640649	CGGGCATGGAACGAAGGAG	+	chr17	10640516	10640694	55	common
chr1	71151157	71151180	TAGGCCAGTAGGTGGTGCTT	+	chr1	71151054	71151256	55	common
chr1	7130666	7130689	GTGGTTGAGCCGACGATCCC	+	chr1	7130563	7130772	55	common
chr1	714261	714284	GCCGCACATAAGCCACGAGG	+	chr1	714184	714339	32	cell-type specific
chr17	14505	14528	GAGAGAGGGGTGCCATCTTG	-	chr17	14474	14610	47	common
chr17	14549	14572	TCTGGCTGTGCACGCGTGGC	-	chr17	14474	14610	47	common
chr17	15406337	15406360	GGAGAACTAAGGCGGGGCGC	+	chr17	15406213	15406429	54	common
chr17	1617279	1617302	GTTCCTCTCACGCCCTCACC	-	chr17	1617206	1617352	52	common
chr17	16318417	16318440	GCAGGTGGAGACAAGGAGGT	-	chr17	16318355	16318541	48	common
chr17	16331606	16331628	GCGGAGGAAGGGAGGACAG	-	chr17	16331471	16331778	53	common
chr17	17045334	17045357	GCGCTCTCCTGCTGTGCCGC	+	chr17	17045242	17045426	53	common
chr17	17291615	17291638	GTGGCTGGCTGACGTCTGTG	+	chr17	17291456	17291687	41	common
chr17	17794451	17794474	CTCAAGGCCCTGTTCTGCTC	+	chr17	17794400	17794593	54	common
chr17	17794476	17794499	TAGCAGTGTGTGCTGGCCAT	-	chr17	17794400	17794593	54	common
chr17	17794495	17794518	GCTACTGCCAGACCAGCAGG	+	chr17	17794400	17794593	54	common
chr17	17794502	17794525	GAGGCCTCCCCCTGCTGGTC	-	chr17	17794400	17794593	54	common
chr17	17822651	17822673	GACACGGGAATGGGAGAGG	-	chr17	17822580	17822780	55	common
chr17	1934113	1934136	GTAATGGGCCTAGGAAGCCT	+	chr17	1933999	1934164	54	common
chr17	1958203	1958225	GGCGAACCTGCGGGTAGGG	+	chr17	1958191	1958409	55	common
chr17	1958396	1958417	GAGACGCGACCAGGACGC	+	chr17	1958191	1958409	55	common
chr17	19998769	19998792	CCTGGACACACGCCACCAGC	+	chr17	19998692	19998890	34	common
chr17	20130253	20130276	CTCCATAGCAGATGTGCGGT	+	chr17	20130149	20130334	55	common
chr17	21032544	21032567	GAGTCACCGGCATGCGGAGG	+	chr17	21032462	21032596	47	common
chr17	22203279	22203302	TTCTGACCGCGGCCAGAAGG	+	chr17	22203232	22203390	19	cell-type specific
chr17	25708155	25708178	CACAGCGTCCCCTTGCGGCT	-	chr17	25708056	25708327	54	common
chr17	25981855	25981878	CGGCCTTCCAGCACTACTGC	+	chr17	25981745	25982212	55	common
chr17	26207261	26207284	CTGGGCTCTGCCTGCGAGCT	-	chr17	26207146	26207328	54	common
chr17	26620097	26620120	CAAGTAGCCAGGACTATAGG	-	chr17	26619991	26620125	5	cell-type specific
chr17	2689700	2689723	GAGGAAAGGGAGCGTCTTCC	-	chr17	2689615	2689853	55	common
chr17	27054006	27054029	CAGGCTGACACCTAGTGGCT	-	chr17	27053899	27054127	55	common
chr17	27090969	27090993	TGGCAGAACACTGGGGCTCTG	-	chr17	27090841	27091003	55	common
chr17	27229976	27229998	GCGGGGCCTGGGCGGGAGC	-	chr17	27229940	27230354	55	common
chr17	27230086	27230108	GCGGGCAGGAGGCTGGGCA	+	chr17	27229940	27230354	55	common
chr17	27230086	27230109	GCGGGCAGGAGGCTGGGCAG	+	chr17	27229940	27230354	55	common
chr17	27230151	27230174	TAGGCGTGCGTCGGCGTCCT	+	chr17	27229940	27230354	55	common
chr17	27280753	27280776	GCACAAGCCACCTTGAAGGA	-	chr17	27280648	27280813	55	common
chr17	2731853	2731876	CGGCGGGAAGAGCGGGTGGA	+	chr17	2731796	2731999	55	common
chr17	27444307	27444330	CAGGCACCGTGGTAACGAAT	-	chr17	27444088	27444449	55	common
chr17	27918799	27918822	CGTGGCTGCAGCCAGTGCAG	-	chr17	27918739	27918941	55	common
chr17	28420766	28420789	GTGGTGATTGGGGAGCCTAT	-	chr17	28420623	28420800	55	common
chr17	2947212	2947234	GCCAGAGAGACACTGCAGG	+	chr17	2947113	2947302	48	common
chr17	29716522	29716545	GTTAGGGGGCATTCAATGCC	+	chr17	29716469	29716674	55	common
chr17	30228736	30228759	GTTACGTCCGGACGCGTCGG	-	chr17	30228757	30228952	55	common
chr17	30334366	30334389	CCCCTTCCCAGGCTGGGCGG	+	chr17	30334247	30334446	55	common
chr17	30646587	30646609	GTGGGAGTGCGGAGGGCGG	+	chr17	30646538	30646773	54	common
chr17	30646588	30646609	TGGGAGTGCGGAGGGCGG	+	chr17	30646538	30646773	54	common
chr17	31264198	31264220	GCCCTCCCGGGTGGGCGGA	-	chr17	31264046	31264235	55	common
chr17	32527153	32527176	GTGGGTCTGCTGTCACCTGC	-	chr17	32527022	32527235	53	common
chr17	33288960	33288983	GTGGTCCACGCAGATGTGGA	-	chr17	33288875	33289117	0	cell-type specific
chr17	33446906	33446929	CGCAGATGGCGCTGCAGGCC	-	chr17	33446839	33447061	54	common
chr17	33446986	33447008	TGAGCGCGGAGGGGGTCGT	-	chr17	33446839	33447061	54	common
chr17	34091896	34091918	GGTGGCGCTGGTGCTGCGT	-	chr17	34091697	34091911	50	common
chr17	34839110	34839133	AGAGAGAGGCGTCGTTGTCG	-	chr17	34838919	34839127	54	common
chr17	34985853	34985876	CCTGCCAAGTGGGTGAGCTG	+	chr17	34985797	34986007	54	common
chr17	3586437	3586460	GTCTCCCTCTGCTGGAGGAG	-	chr17	3586327	3586753	55	common
chr17	3586442	3586465	GTGGAGTCTCCCTCTGCTGG	-	chr17	3586327	3586753	55	common
chr17	3586502	3586523	GGAGAGTGGAGGTGGGAA	+	chr17	3586327	3586753	55	common
chr17	36489777	36489800	CTGGGGTCCACCTCACAGGC	+	chr17	36489627	36489843	55	common
chr17	36505169	36505192	CTGCTGTCCAGCTGCTTTCC	-	chr17	36505085	36505288	54	common
chr17	36571070	36571092	GGAAGGGCCCGGAGGCTGC	+	chr17	36571048	36571299	55	common
chr17	36665712	36665735	GCAGCGGGTGGAGAGGAGGT	+	chr17	36665698	36665869	53	common
chr17	36714452	36714475	CCAGCCTCACTTGAGCTGCT	+	chr17	36714415	36714622	54	common
chr17	36740785	36740807	GTCCTCCTAGCCGGCCACT	-	chr17	36740688	36740893	55	common
chr17	36819451	36819474	GTGAACACTCCAGGTCAGCC	+	chr17	36819436	36819816	55	common
chr17	36819460	36819483	GTGAGAGCTCCCGGCTGACC	-	chr17	36819436	36819816	55	common
chr17	36819478	36819501	CTCACAGCCATTCGGGGACC	+	chr17	36819436	36819816	55	common
chr17	36819511	36819534	GTGCTGCTGTGCTGCCCCCT	+	chr17	36819436	36819816	55	common
chr17	36833450	36833473	GAAATGGTAATTGCAGCAGC	-	chr17	36833380	36833579	53	common
chr17	36833494	36833517	CCCATCCTCAGCCTGCTATG	+	chr17	36833380	36833579	53	common
chr17	37350748	37350771	GTTGGGTGGAGGCAGGTCCT	-	chr17	37350706	37350896	29	cell-type specific
chr17	37778236	37778258	CAGGCAGTGGCCAGAGCAG	+	chr17	37778246	37778461	53	common
chr17	37778236	37778259	CAGGCAGTGGCCAGAGCAGG	+	chr17	37778246	37778461	53	common
chr17	38170164	38170187	GGGCCATCTCTGGTGCTTGG	-	chr17	38170052	38170276	55	common
chr17	3817404	3817427	GTCACACAGCAGAGGGTGGA	-	chr17	3817201	3817433	55	common
chr17	38375460	38375483	CCTTTACGTGGGCCGGCAGG	+	chr17	38375398	38375567	48	common
chr17	38511524	38511546	CACCCGGTCCGGCTGCTCC	-	chr17	38511364	38511526	55	common
chr17	38716634	38716657	GCACCTTCTCCTGGAGGCTG	+	chr17	38716601	38716813	55	common
chr17	39705273	39705294	CCCCTCGCGGCCCCCAGG	-	chr17	39705200	39705395	49	common
chr17	39735905	39735928	GTGCTGGGAGGGTGGAGAGA	+	chr17	39735892	39736044	55	common
chr17	39805011	39805034	GCTCCTTCCAACCCAGGCTG	+	chr17	39804961	39805162	55	common
chr17	39818996	39819019	CTGCTGGGCTAAGGGGCGCT	-	chr17	39818985	39819220	53	common
chr17	39823500	39823523	GTCCCTTGTAGCCTCAGCAT	-	chr17	39823336	39823525	54	common
chr17	39894481	39894504	GTCCCTACTCCACTTTCTGT	-	chr17	39894309	39894525	55	common
chr17	39968011	39968034	AGCAGTACGAGGGAGAGAGC	-	chr17	39967909	39968086	52	common
chr17	40115115	40115138	CTGGCCTGCGTCCTTGTGCC	+	chr17	40115066	40115256	55	common
chr17	40171957	40171981	CTTGGGCTCCCGCGCACACCC	+	chr17	40171931	40172106	54	common
chr17	40177088	40177111	GCCGCTCCCTCCAGCCACCA	+	chr17	40177017	40177202	53	common
chr17	40177164	40177187	CCCGCCAGCCTCGCTCTTGG	+	chr17	40177017	40177202	53	common
chr17	40180761	40180783	CTGGAGCCCAGGGAAAGGG	-	chr17	40180650	40180818	39	common
chr17	40219466	40219489	GCCACCTGGAGGCTATCTGT	-	chr17	40219366	40219797	55	common
chr17	40219529	40219553	CTGGGGTCTGTCATGCCCAGG	-	chr17	40219366	40219797	55	common
chr17	40315189	40315212	TGGACAGGTGGATGGGCAGA	+	chr17	40315153	40315333	51	common
chr17	40464380	40464403	GCTGGTCTCTGGGAAGGAGG	-	chr17	40464292	40464485	49	common
chr17	40669579	40669602	CTGTTCCCGTGACACGAGTG	+	chr17	40669589	40669801	53	common
chr17	40669689	40669712	CTGGATCTTCCCTGTGGCCC	+	chr17	40669589	40669801	53	common
chr17	40669697	40669720	TCCCTGTGGCCCAGGACTGC	+	chr17	40669589	40669801	53	common
chr17	40730598	40730621	ATACCGAGCTTCGCACCCAG	+	chr17	40730418	40730699	55	common
chr17	40833438	40833461	CTCCAACCTCCGTCTGGAGT	+	chr17	40833246	40833476	54	common
chr17	40915582	40915605	CTGCAGGCCACACCCAGTCC	-	chr17	40915531	40915760	55	common
chr17	40915622	40915645	GCTGGCTTTAGTGGACACCA	-	chr17	40915531	40915760	55	common
[truncated: 2,630 more rows]
