# Supplementary material for: Whole-genome epigenetic function annotation through sgRNA libraries synthesized by controlled template-dependent elongation
Source: Research Square preprint supplement (doi:10.21203/rs.3.rs-100657/v1), 2020-11-05
Supplement: Supplementary file 5 [file TableS14.xlsx]

## Sheet: Primer list
Name	Sequence (5' to 3')	Modification
chr1-12617132-F	CACCGGAAATGGGCCGCACAGCAGG
chr1-12617132-R	AAACCCTGCTGTGCGGCCCATTTCC
chr4-1785614-F	CACCGACCCTTGGCACCCAGGATGG
chr4-1785614-R	AAACCCATCCTGGGTGCCAAGGGTC
chr1-22352881-F	CACCGGTTACTCGAGTGGCTGAGGC
chr1-22352881-R	AAACGCCTCAGCCACTCGAGTAACC
chr11-41682097-F	CACCGAAGCCGGGCGTGGTGGTGC
chr11-41682097-R	AAACGCACCACCACGCCCGGCTTC
chr2-84542118-F	CACCGGGCGAAGGAAGGCCACAAGG
chr2-84542118-R	AAACCCTTGTGGCCTTCCTTCGCCC
chr2-114361824-F	CACCGGTGGTGGCATGCCGCCTGC
chr2-114361824-R	AAACGCAGGCGGCATGCCACCACC
H-CDC42-RT-F	CCATCGGAATATGTACCGACTG
H-CDC42-RT-R	CTCAGCGGTCGTAATCTGTCA
H-GAPDH-RT-F	GGTGAAGGTCGGAGTCAACG
H-GAPDH-RT-R	CCATGTAGTTGAGGTCAATGAAG
H-LINC00339-RT-1-F	GGTTGACGAAGTCTGGAACG
H-LINC00339-RT-1-R	GCCCATCATTTCATTGGGTA
CDC42-plvx-XhoI-F	ccgctcgagatgcagacaattaag
CDC42-plvx-BamHI-R	cgggatcctcatagcagcacacacct
LINC00339-shRNA-1-F	CCGGGCCAGAAGTTGTCCTACTACCCTCGAGGGTAGTAGGACAACTTCTGGCTTTTTG
LINC00339-shRNA-1-R	AATTCAAAAAGCCAGAAGTTGTCCTACTACCCTCGAGGGTAGTAGGACAACTTCTGGC
LINC00339-shRNA-3-F	CCGGGCCTGCATATGAGAAGTCAACCTCGAGGTTGACTTCTCATATGCAGGCTTTTTG
LINC00339-shRNA-3-R	AATTCAAAAAGCCTGCATATGAGAAGTCAACCTCGAGGTTGACTTCTCATATGCAGGC
LINC00339-sgRNA-F	CACCGGTTACTCGAGTGGCTGAGGC
LINC00339-sgRNA-R	AAACGCCTCAGCCACTCGAGTAACC
A1-F	GAAAGGACGAAACACCgT
A1-R	cGGTGTTTCGTCCTTTCCACaagatAGATCGGAAGAGCGTC	3'-Biotin
AnnealPrimer	tgGACGCTCTTCCGATCTATCTTGTGGAAAGGACGAAACACCGT
A2-F	CGCGCCCACACGTCTGAACTCCAGTCACAGTCAACAATCTCGTATGCCGTCTTCTGCT
A2-R	CAAGCAGAAGACGGCATACGAGATTGTTGACTGTGACTGGAGTTCAGACGTGTGGGCGCG
A3-F	TCTTCAAGCTTGGCGTAATCATGGTCATAGCTGTTTCCTGTGTGAAATTGTTATCCGC
A3-R	AGCGGATAACAATTTCACACAGGAAACAGCTATGACCATGATTACGCCAAGCTTGAAGA
A4-F	GTTTTAGAGCTAGAAATAGCAAGTTAAA
Array-F	TAACTTGAAAGTATTTCGATTTCTTGGCTTTATATATCTTGTGGAAAGGACGAAACACCG
Array-R	ACTTTTTCAAGTTGATAACGGACTAGCCTTATTTTAACTTGCTATTTCTAGCTCTAAAAC
Round1-F	AATGGACTATCATATGCTTACCGTAACTTGAAAGTATTTCG
Round1-R	AATGGACTATCATATGCTTACCGTAACTTGAAAGTATTTCG
chr7-35872659-F	CACCGGTGGGAGTGGGCGTGGGGGT
chr7-35872659-R	AAACACCCCCACGCCCACTCCCACC
chr19-61275645-F	CACCGCTATGTTCGGGCGGGACGAT
chr19-61275645-R	AAACATCGTCCCGCCCGAACATAGC
chr12-86827183-F	CACCGGCAGGGTCGGGGTAGGAGG
chr12-86827183-R	AAACCCTCCTACCCCGACCCTGCC
chr19-21447441-F	CACCGGCGGGGAGAGAGGTGGCGG
chr19-21447441-R	AAACCCGCCACCTCTCTCCCCGCC
chr15-12027230-F	CACCGGGTTGGGAGCTGCCCGATGT
chr15-12027230-R	AAACACATCGGGCAGCTCCCAACCC
chr14-63078202-F	CACCGGGCTGTGTCACTGTGAGTGT
chr14-63078202-R	AAACACACTCACAGTGACACAGCCC
Round2-F-0	AATGATACGGCGACCACCGAGATCTACACTCTTTCCCTACACGACGCTCTTCCGATCTtcttgtggaaaggacgaaacaccg
Round2-F-1	AATGATACGGCGACCACCGAGATCTACACTCTTTCCCTACACGACGCTCTTCCGATCTacagtggaaaggacgaaacaccg
Round2-F-2	AATGATACGGCGACCACCGAGATCTACACTCTTTCCCTACACGACGCTCTTCCGATCTgaccggaaaggacgaaacaccg
Round2-F-3	AATGATACGGCGACCACCGAGATCTACACTCTTTCCCTACACGACGCTCTTCCGATCTccacgaaaggacgaaacaccg
Round2-F+1	AATGATACGGCGACCACCGAGATCTACACTCTTTCCCTACACGACGCTCTTCCGATCTaagtcgtggaaaggacgaaacaccg
Round2-F+2	AATGATACGGCGACCACCGAGATCTACACTCTTTCCCTACACGACGCTCTTCCGATCTcgtatcgtggaaaggacgaaacaccg
Round2-R-108	CAAGCAGAAGACGGCATACGAGATTCTATGGTGACTGGAGTTCAGACGTGTGCTCTTCCGATCTcgctctgcccactgacgggcaccgg
Round2-R-116	CAAGCAGAAGACGGCATACGAGATACTCGAGTGACTGGAGTTCAGACGTGTGCTCTTCCGATCTcgctctgcccactgacgggcaccgg
Round2-R-119	CAAGCAGAAGACGGCATACGAGATTGCACTGTGACTGGAGTTCAGACGTGTGCTCTTCCGATCTcgctctgcccactgacgggcaccgg
Round2-R-123	CAAGCAGAAGACGGCATACGAGATATGCTGGTGACTGGAGTTCAGACGTGTGCTCTTCCGATCTcgctctgcccactgacgggcaccgg
Round2-R-124	CAAGCAGAAGACGGCATACGAGATGCGATCGTGACTGGAGTTCAGACGTGTGCTCTTCCGATCTcgctctgcccactgacgggcaccgg
Round2-R-131	CAAGCAGAAGACGGCATACGAGATCTATACGTGACTGGAGTTCAGACGTGTGCTCTTCCGATCTcgctctgcccactgacgggcaccgg

## Sheet: Neo gRNA
gRNA name	Sequence
neo-s1	AGCCTCTCCACCCAAGCGGC
neo-s2	GAATAGCCTCTCCACCCAAG
neo-s3	CGCTGACAGCCGGAACACGG
neo-s4	CTGCGCTGACAGCCGGAACA
neo-s5	GGCGCCCCTGCGCTGACAGC
neo-s6	CGGTCTTGACAAAAAGAACC
neo-s7	TCGGTCTTGACAAAAAGAAC
neo-s8	ATTCAGGGCACCGGACAGGT
neo-s9	GTTCATTCAGGGCACCGGAC
neo-s10	CTGCAGTTCATTCAGGGCAC
neo-s11	CTCGTCCTGCAGTTCATTCA
neo-s12	CCTCGTCCTGCAGTTCATTC
neo-s13	TGCGCAAGGAACGCCCGTCG
neo-s14	ACGTCGAGCACAGCTGCGCA
neo-s15	GATGACAGGAGATCCTGCCC
neo-s16	CAGGAGCAAGGTGAGATGAC
neo-s17	ATACTTTCTCGGCAGGAGCA
neo-s18	ATGATGGATACTTTCTCGGC
neo-s19	AGCCATGATGGATACTTTCT
neo-s20	CCGCATTGCATCAGCCATGA
neo-s21	TGGTCGAATGGGCAGGTAGC
neo-s22	CGCTTGGTGGTCGAATGGGC
neo-s23	GTTTCGCTTGGTGGTCGAAT
neo-s24	TGTTTCGCTTGGTGGTCGAA
neo-s25	CGATGCGATGTTTCGCTTGG
neo-s26	GCTCGATGCGATGTTTCGCT
neo-s27	ATCATCCTGATCGACAAGAC
neo-s28	AGCCTGGCGAACAGTTCGGC
neo-s29	CTTGAGCCTGGCGAACAGTT
neo-s30	GGGCATGCGCGCCTTGAGCC
neo-s31	ACGACGAGATCCTCGCCGTC
neo-s32	CACGACGAGATCCTCGCCGT
neo-s33	CGGCAAGCAGGCATCGCCAT
neo-s34	TCGGCAAGCAGGCATCGCCA
neo-s35	CACCATGATATTCGGCAAGC
neo-s36	CCATTTTCCACCATGATATT
neo-s37	AGTCGATGAATCCAGAAAAG
neo-s38	AGCGGTCCGCCACACCCAGC
neo-s39	CCAACGCTATGTCCTGATAG
neo-s40	AAGCTCTTCAGCAATATCAC
neo-s41	CAAGCTCTTCAGCAATATCA
neo-s42	TACCGTAAAGCACGAGGAAG
neo-s43	CGGCGATACCGTAAAGCACG
neo-s44	GATGCGCTGCGAATCGGGAG
neo-s45	AAGGCGATGCGCTGCGAATC
neo-s46	GAAGGCGATGCGCTGCGAAT
neo-s47	CTCGTCAAGAAGGCGATAGA
neo-s48	GAACAAGATGGATTGCACGC
neo-s49	TGGATTGCACGCAGGTTCTC
neo-s50	ACGCAGGTTCTCCGGCCGCT
neo-s51	CGCAGGTTCTCCGGCCGCTT
neo-s52	AGGTTCTCCGGCCGCTTGGG
neo-s53	CTCCGGCCGCTTGGGTGGAG
neo-s54	GCTTGGGTGGAGAGGCTATT
neo-s55	AGAGGCTATTCGGCTATGAC
neo-s56	GAGGCTATTCGGCTATGACT
neo-s57	GACTGGGCACAACAGACAAT
neo-s58	GCTCTGATGCCGCCGTGTTC
neo-s59	CGTGTTCCGGCTGTCAGCGC
neo-s60	GTGTTCCGGCTGTCAGCGCA
neo-s61	TGTTCCGGCTGTCAGCGCAG
neo-s62	GCTGTCAGCGCAGGGGCGCC
neo-s63	TTTGTCAAGACCGACCTGTC
neo-s64	CGGTGCCCTGAATGAACTGC
neo-s65	CCTGAATGAACTGCAGGACG
neo-s66	AACTGCAGGACGAGGCAGCG
neo-s67	ACGAGGCAGCGCGGCTATCG
neo-s68	GGCAGCGCGGCTATCGTGGC
neo-s69	GCTATCGTGGCTGGCCACGA
neo-s70	CTATCGTGGCTGGCCACGAC
neo-s71	GCTCGACGTTGTCACTGAAG
neo-s72	CTCGACGTTGTCACTGAAGC
neo-s73	ACGTTGTCACTGAAGCGGGA
neo-s74	CGTTGTCACTGAAGCGGGAA
neo-s75	TCACTGAAGCGGGAAGGGAC
neo-s76	GGGAAGGGACTGGCTGCTAT
neo-s77	GGAAGGGACTGGCTGCTATT
neo-s78	GCTGCTATTGGGCGAAGTGC
neo-s79	CTGCTATTGGGCGAAGTGCC
neo-s80	TGCTATTGGGCGAAGTGCCG
neo-s81	ATTGGGCGAAGTGCCGGGGC
neo-s82	TGCCGAGAAAGTATCCATCA
neo-s83	CCATCATGGCTGATGCAATG
neo-s84	TCATGGCTGATGCAATGCGG
neo-s85	GCGGCTGCATACGCTTGATC
neo-s86	GCATCGAGCGAGCACGTACT
neo-s87	CGAGCGAGCACGTACTCGGA
neo-s88	GCACGTACTCGGATGGAAGC
neo-s89	GGAAGCCGGTCTTGTCGATC
neo-s90	TCTTGTCGATCAGGATGATC
neo-s91	TGATCTGGACGAAGAGCATC
neo-s92	GATCTGGACGAAGAGCATCA
neo-s93	ATCTGGACGAAGAGCATCAG
neo-s94	CGCCAGCCGAACTGTTCGCC
neo-s95	CGAACTGTTCGCCAGGCTCA
neo-s96	CTCAAGGCGCGCATGCCCGA
neo-s97	GGCGCGCATGCCCGACGGCG
neo-s98	GAGGATCTCGTCGTGACCCA
neo-s99	TGCCTGCTTGCCGAATATCA
neo-s100	CTGCTTGCCGAATATCATGG
neo-s101	CCGAATATCATGGTGGAAAA
neo-s102	GTGGAAAATGGCCGCTTTTC
neo-s103	TTTTCTGGATTCATCGACTG
neo-s104	CTGGATTCATCGACTGTGGC
neo-s105	ATTCATCGACTGTGGCCGGC
neo-s106	TTCATCGACTGTGGCCGGCT
neo-s107	CGACTGTGGCCGGCTGGGTG
neo-s108	CTGTGGCCGGCTGGGTGTGG
neo-s109	GGGTGTGGCGGACCGCTATC
neo-s110	CCGCTATCAGGACATAGCGT
neo-s111	CGTGATATTGCTGAAGAGCT
neo-s112	GATATTGCTGAAGAGCTTGG
neo-s113	CTGAAGAGCTTGGCGGCGAA
neo-s114	TGAAGAGCTTGGCGGCGAAT
neo-s115	GACCGCTTCCTCGTGCTTTA
non-target control-1	GCGAGGTATTCGGCTCCGCG
non-target control-2	GCTTTCACGGAGGTTCGACG
non-target control-3	ATGTTGCAGTTCGGCTCGAT
non-target control-4	ACGTGTAAGGCGAACGCCTT
non-target control-5	GACTCCGGGTACTAAATGTC
non-target control-6	CCGCGCCGTTAGGGAACGAG
non-target control-7	ATTGTTCGACCGTCTACGGG
non-target control-8	ACCCATCGGGTGCGATATGG
non-target control-9	CGGGCGTCACCTGCTAGTAA
non-target control-10	GCTTCTACTCGCAACGTATT
non-target control-11	TACAGTTATACGTCGCGGTG
non-target control-12	AAGCACAAGAACGGTCCGCC
non-target control-13	CAGCCACCGCACCGGCGTAA
non-target control-14	GTCAAGCCGAACGCTGCCGG
non-target control-15	CCTTAGACCGGGTGTACCTC
non-target control-16	AAGTCTATGCGGGGCTCGTA
non-target control-17	TTGTCAACTTCGGCCAACGC
non-target control-18	ATAGATGTCTACGCGCCGTT
non-target control-19	CTCGGGCTATTCAGCGATAG
non-target control-20	GCGGTTACCGCGAAAACCAT
