# Supplementary material for: Whole-genome epigenetic function annotation through sgRNA libraries synthesized by controlled template-dependent elongation
Source: Research Square preprint supplement (doi:10.21203/rs.3.rs-100657/v1), 2020-11-05
Supplement: Supplementary file 6 [file TableS15.xlsx]

## Sheet: hg19
Chr	Start	End
chr1	564067	570700
chr1	951343	951872
chr1	38077160	38077610
chr1	91852297	91853389
chr1	104163435	104164059
chr1	121350344	121485784
chr1	149032460	149037445
chr1	156185840	156187041
chr1	224195549	224206468
chr1	236258638	236262018
chr2	33992004	33992968
chr2	49456441	49457451
chr2	88124178	88125171
chr2	90367640	90396548
chr2	91513864	92434385
chr2	132936336	133062917
chr2	149638573	149640158
chr2	162133649	162141369
chr3	90319999	90509857
chr3	96333567	96340073
chr3	160664628	160666462
chr3	196624980	196626457
chr4	49062585	49681647
chr4	56189682	56197885
chr4	68246604	68283361
chr4	78928612	78931025
chr4	163340706	163344917
chr5	46283288	46440226
chr5	49403110	49553067
chr5	60056886	60057792
chr5	79944536	79949461
chr5	93902882	93906328
chr5	134256018	134266140
chr5	99377330	99397065
chr6	58768332	58785825
chr6	61893328	61916436
chr6	62283165	62285216
chr7	45291102	45292043
chr7	57538530	57562577
chr7	57984113	58018203
chr7	60957027	62322777
chr8	39926323	39928651
chr8	43090306	43099539
chr8	43754550	43850302
chr8	46832700	46913665
chr8	47303235	47305297
chr8	47368280	47368957
chr8	68497158	68498441
chr8	70601651	70603521
chr8	100506308	100509801
chr9	42818381	42819742
chr9	44069640	44071589
chr9	44990950	44994502
chr9	66632853	70422938
chr10	38746160	39176865
chr10	42336255	42860626
chr11	10528368	10532380
chr11	48612934	49072020
chr11	50522050	50522886
chr11	50641185	50786915
chr11	51553704	51601966
chr11	54755935	55083853
chr11	73220214	73222749
chr12	20703765	20705101
chr12	34826405	34859644
chr12	37945017	38353151
chr13	110075561	110077576
chr14	18995273	19057354
chr14	32952936	32955017
chr15	20001562	20004903
chr16	33822177	34244081
chr16	35168706	35309944
chr16	46370863	46547609
chr17	22018673	22027439
chr17	22240527	22268824
chr17	25261810	25272545
chr17	41399470	41401557
chr17	41381162	41383186
chr17	51182854	51184196
chr18	103520	113499
chr18	2841381	2842906
chr18	18498473	18532000
chr18	45378927	45380540
chr18	50318730	50319636
chr19	24525628	24526826
chr19	24586576	24588253
chr19	27704936	27999013
chr20	25877091	30045112
chr21	8881364	14784269
chr22	16843700	16871193
chr22	18685869	18689938
chr22	18716861	18722496
chr22	18874013	18887161
chr22	20688197	20690220
chr22	36281262	36282033
chrX	55206464	55209813
chrX	58489212	58584208
chrX	61528360	62150861
chrX	125605022	125607787
chrY	12669534	14382919
chrY	58074249	59145115

## Sheet: mm9
Chr	Start	End
chr1	24616961	24624233
chr2	22443357	22446555
chr2	98501540	98508411
chr3	8244314	8247414
chr3	5860272	5861115
chr4	3005754	3020787
chr4	70038683	70039705
chr4	79648014	79651425
chr5	105352171	105358127
chr5	147072105	147073417
chr6	29697802	29699784
chr6	79767710	79768618
chr6	3131864	3152692
chr7	89918615	89921245
chr9	35112367	35113483
chr9	2998680	3039303
chr11	2988218	3108005
chr11	53953135	53954594
chr11	108872273	108873859
chr12	98299360	98300343
chr15	74915372	74918124
chr16	57390661	57392842
chr17	3000536	3101363
chr17	13498466	13499422
chr17	36367630	36369070
chr17	39978274	39987025
chr18	3003561	3011715
chr18	40467221	40468557
chr18	82390074	82391176
chr19	61274915	61276284
chrX	109484090	109485180
chrX	166404584	166448563
