# Supplementary material for: Whole-genome epigenetic function annotation through sgRNA libraries synthesized by controlled template-dependent elongation
Source: Research Square preprint supplement (doi:10.21203/rs.3.rs-100657/v1), 2020-11-05
Supplement: Supplementary file 7 [file TableS5.xlsx]

## Sheet: Exons
Description	pvalue	p.adjust	Count
ncRNA metabolic process	1.02365e-69	4.10369e-66	173
ribosome biogenesis	1.46273e-69	4.10369e-66	135
ribonucleoprotein complex assembly	2.72152e-23	1.69672e-20	70
ribonucleoprotein complex subunit organization	4.35794e-23	2.44524e-20	72
regulation of mitotic cell cycle	5.74183e-19	2.01359e-16	104
regulation of chromosome organization	9.28937e-19	3.06604e-16	84
regulation of DNA metabolic process	1.207e-18	3.7625e-16	96
mitotic cell cycle phase transition	4.61414e-17	1.07875e-14	81
mitotic nuclear division	5.97694e-17	1.34146e-14	66
telomere organization	1.70932e-15	3.19701e-13	42
mitotic sister chromatid segregation	2.62026e-15	4.74267e-13	45
RNA localization	1.95389e-14	3.04535e-12	48
establishment of protein localization to organelle	3.24447e-14	4.66788e-12	78
nuclear division	8.67496e-14	1.15893e-11	81
regulation of translation	6.5471e-12	6.55996e-10	67
regulation of binding	8.31493e-12	7.90764e-10	76
nucleocytoplasmic transport	8.79498e-12	8.08994e-10	61
nuclear transport	8.79498e-12	8.08994e-10	61
blastocyst development	2.01422e-11	1.7659e-09	40
protein stabilization	2.46871e-11	2.13107e-09	43
nucleic acid transport	3.3615e-11	2.77373e-09	39
RNA transport	3.3615e-11	2.77373e-09	39
regulation of cellular amide metabolic process	5.36806e-11	4.18336e-09	71
mitochondrial gene expression	1.58538e-10	1.14046e-08	31
proteasomal protein catabolic process	1.64434e-10	1.1679e-08	80
histone modification	2.11926e-10	1.45014e-08	76
covalent chromatin modification	5.64134e-10	3.51706e-08	77
spindle organization	5.80942e-10	3.58205e-08	40
cellular response to amino acid starvation	1.87284e-09	1.08335e-07	18
protein export from nucleus	1.91805e-09	1.09818e-07	32
regulation of protein modification by small protein conjugation or removal	2.30628e-09	1.30712e-07	48
regulation of mitotic nuclear division	4.17033e-09	2.27182e-07	38
organophosphate biosynthetic process	4.98797e-09	2.64033e-07	81
ribonucleoprotein complex localization	6.26995e-09	3.22759e-07	22
response to amino acid starvation	1.07795e-08	5.32062e-07	18
signal transduction by p53 class mediator	1.45447e-08	6.91615e-07	33
protein import	2.74887e-08	1.23391e-06	43
anatomical structure homeostasis	3.76585e-08	1.6254e-06	66
protein-DNA complex assembly	7.55815e-08	3.05099e-06	37
protein folding	9.30875e-08	3.70435e-06	34
iron-sulfur cluster assembly	1.1291e-07	4.43035e-06	11
metallo-sulfur cluster assembly	1.1291e-07	4.43035e-06	11
autophagy	1.65067e-07	6.1746e-06	63
process utilizing autophagic mechanism	1.65067e-07	6.1746e-06	63
establishment of protein localization to membrane	1.6733e-07	6.21782e-06	43
regulation of chromosome segregation	1.9733e-07	7.09757e-06	26
methylation	2.00387e-07	7.16159e-06	57
regulation of chromosome separation	3.97914e-07	1.35315e-05	19
establishment of chromosome localization	5.37663e-07	1.79573e-05	21
ribonucleoside monophosphate metabolic process	5.44049e-07	1.80631e-05	48
RNA surveillance	6.20169e-07	2.02312e-05	9
regulation of protein localization to chromosome, telomeric region	6.20169e-07	2.02312e-05	9
chromosome localization	6.84761e-07	2.20816e-05	21
energy coupled proton transport, down electrochemical gradient	7.17354e-07	2.26128e-05	11
ATP synthesis coupled proton transport	7.17354e-07	2.26128e-05	11
negative regulation of mitotic metaphase/anaphase transition	1.59636e-06	4.43425e-05	14
negative regulation of transferase activity	1.90486e-06	5.2393e-05	43
stem cell population maintenance	2.1096e-06	5.69085e-05	33
cellular component disassembly	2.51965e-06	6.54525e-05	56
negative regulation of phosphorylation	2.92325e-06	7.55869e-05	67
viral process	3.02557e-06	7.78738e-05	47
regulation of autophagy	3.302e-06	8.19802e-05	43
maintenance of cell number	3.64764e-06	8.97671e-05	33
cellular response to radiation	3.685e-06	9.02906e-05	31
mitochondrial membrane organization	3.76958e-06	9.15633e-05	23
cellular response to topologically incorrect protein	3.76958e-06	9.15633e-05	23
mitochondrial transport	3.82478e-06	9.25036e-05	34
negative regulation of chromosome separation	4.40163e-06	0.000105096	14
response to topologically incorrect protein	5.27136e-06	0.000118785	27
interaction with host	9.02139e-06	0.000192468	25
cellular response to interleukin-4	1.14493e-05	0.000234571	11
viral gene expression	1.14547e-05	0.000234571	16
response to endoplasmic reticulum stress	1.56638e-05	0.000308384	39
protein-containing complex localization	1.80574e-05	0.000349379	41
response to UV	2.2705e-05	0.000433977	27
response to interleukin-4	2.39516e-05	0.000450981	11
spindle localization	2.48904e-05	0.000459409	14
DNA damage checkpoint	2.5584e-05	0.000469123	22
purine-containing compound metabolic process	3.06511e-05	0.000550539	67
establishment of spindle localization	3.16568e-05	0.000560336	13
regulation of cyclin-dependent protein kinase activity	3.49201e-05	0.000610394	18
regulation of nucleocytoplasmic transport	4.56441e-05	0.000773744	23
endomembrane system organization	4.90039e-05	0.000825709	55
toxin transport	5.23592e-05	0.000874368	12
regulation of ribosome biogenesis	5.75196e-05	0.00094094	7
regulation of response to DNA damage stimulus	5.95573e-05	0.000965827	35
protein acetylation	7.93517e-05	0.00125775	32
mitochondrion morphogenesis	8.08205e-05	0.00127026	9
fibroblast proliferation	8.68464e-05	0.00134612	22
regulation of viral process	9.00714e-05	0.00138844	31
cell-cell signaling by wnt	9.35783e-05	0.00143461	59
regulation of cell growth	0.000106572	0.00160315	59
phospholipid biosynthetic process	0.000116607	0.00174036	28
positive regulation of chromatin organization	0.000132098	0.00196085	22
epithelial tube morphogenesis	0.000142724	0.0021019	53
positive regulation of mitotic sister chromatid segregation	0.000165018	0.00237415	7
placenta development	0.000177223	0.00251747	29
meiotic cell cycle	0.000186115	0.00263709	45
regulation of fibroblast proliferation	0.000188219	0.00266019	21
regulation of attachment of spindle microtubules to kinetochore	0.00020207	0.00281344	6
regulation of microtubule-based process	0.00022922	0.00314462	36
cellular response to external stimulus	0.000231526	0.00316852	42
NADH dehydrogenase complex assembly	0.00024029	0.00326457	12
mitochondrial respiratory chain complex I assembly	0.00024029	0.00326457	12
regulation of ATPase activity	0.000286557	0.00380112	14
meiotic chromosome segregation	0.000290171	0.00383457	19
regulation of autophagosome assembly	0.000331574	0.00433674	10
dsRNA processing	0.000373225	0.00482527	12
production of small RNA involved in gene silencing by RNA	0.000373225	0.00482527	12
establishment of protein localization to plasma membrane	0.000414116	0.00526198	14
cellular protein-containing complex localization	0.000421759	0.00530604	9
regulation of cell division	0.000539668	0.00665511	26
negative regulation of GTPase activity	0.000558132	0.00684785	9
cell redox homeostasis	0.000587194	0.00711608	14
actin filament bundle assembly	0.000630965	0.00763005	27
negative regulation of cellular catabolic process	0.000658106	0.00790714	36
protein polyubiquitination	0.000709186	0.00831112	30
regulation of gene silencing	0.000715225	0.00831112	18
response to leucine	0.000718391	0.00831112	5
cellular response to leucine	0.000718391	0.00831112	5
positive regulation of chromosome separation	0.000718391	0.00831112	5
synapse maturation	0.000728587	0.00841173	9
protein maturation	0.000732756	0.00844249	42
negative regulation of catabolic process	0.000742418	0.00850144	41
cellular response to environmental stimulus	0.000742418	0.00850144	41
positive regulation of ATPase activity	0.000877936	0.00979901	10
maintenance of protein localization in organelle	0.000877936	0.00979901	10
cellular nitrogen compound catabolic process	0.000906222	0.0100689	58
endoplasmic reticulum unfolded protein response	0.000991951	0.0108708	13
fibroblast apoptotic process	0.00115485	0.0125094	7
positive regulation of growth	0.00116158	0.0125106	42
epithelial cell morphogenesis	0.00117198	0.0125735	11
vesicle-mediated transport to the plasma membrane	0.00118652	0.0127053	18
oligosaccharide-lipid intermediate biosynthetic process	0.00122643	0.0128867	5
membrane fission	0.00122643	0.0128867	5
prenylation	0.00122643	0.0128867	5
heterocycle catabolic process	0.00123852	0.0129895	58
ubiquinone biosynthetic process	0.00130649	0.0136005	6
quinone biosynthetic process	0.00130649	0.0136005	6
regulation of carbohydrate metabolic process	0.00133944	0.0138921	28
positive regulation of cell morphogenesis involved in differentiation	0.00133944	0.0138921	28
binding of sperm to zona pellucida	0.0013497	0.0139727	10
positive regulation of cell projection organization	0.0013711	0.014168	58
negative regulation of fat cell differentiation	0.00141806	0.0145196	12
endoderm development	0.0015131	0.0152424	14
positive regulation of catabolic process	0.00157492	0.015752	53
response to oxidative stress	0.00178677	0.017558	51
regulation of small molecule metabolic process	0.00179722	0.0175973	46
cardiac muscle tissue development	0.00180019	0.0175973	36
cellular senescence	0.00187543	0.0180044	13
regulation of RNA binding	0.00195811	0.0186536	5
regulation of proteolysis involved in cellular protein catabolic process	0.00203441	0.0192173	30
regulation of carbohydrate biosynthetic process	0.00212509	0.0198731	18
ERAD pathway	0.00214681	0.0200428	17
regulation of membrane permeability	0.00217644	0.0202521	13
response to transforming growth factor beta	0.00236264	0.0217218	30
regulation of generation of precursor metabolites and energy	0.00247641	0.0224477	20
positive regulation of gluconeogenesis	0.00261807	0.0233545	6
regulation of receptor clustering	0.00261807	0.0233545	6
autophagosome organization	0.00269871	0.0238665	17
stem cell proliferation	0.00272256	0.0239075	22
developmental maturation	0.00272267	0.0239075	40
fat cell differentiation	0.00282958	0.0246152	33
erythrocyte differentiation	0.00287093	0.0248976	21
circadian regulation of gene expression	0.00289781	0.025092	13
vesicle docking involved in exocytosis	0.00290685	0.0251315	10
regulation of apoptotic signaling pathway	0.00314356	0.0267657	51
cellular response to oxidative stress	0.00322566	0.0273815	36
long-term memory	0.00345839	0.0287482	9
regulation of fibroblast apoptotic process	0.00355834	0.0293616	6
aromatic compound catabolic process	0.00388813	0.0318022	57
regulation of cardiac muscle tissue development	0.0041589	0.0337707	17
regulation of gene expression, epigenetic	0.0042425	0.0343343	37
autophagosome assembly	0.00428265	0.0343343	16
cellular response to drug	0.00429478	0.0343343	47
coenzyme biosynthetic process	0.00432005	0.0344805	27
positive regulation of neuron projection development	0.00442422	0.0351121	45
retrograde protein transport, ER to cytosol	0.00451091	0.0355025	7
nucleosome organization	0.00451137	0.0355025	21
positive regulation of stem cell proliferation	0.00453395	0.0356302	11
retrograde axonal transport	0.0047279	0.036896	6
regulation of cell aging	0.0048231	0.0373275	10
enteroendocrine cell differentiation	0.00492816	0.0379313	8
neuron projection extension	0.00498916	0.0382958	27
regulation of mitochondrial membrane potential	0.00555877	0.0423206	14
developmental growth involved in morphogenesis	0.00570529	0.04326	35
muscle cell migration	0.00621321	0.0462584	17
protein N-linked glycosylation	0.00624913	0.0462584	12
nucleosome assembly	0.00650737	0.0477917	16
cellular response to virus	0.00657201	0.0482033	10
glucose metabolic process	0.00658877	0.0482632	27
nuclear envelope reassembly	0.00680011	0.04898	4
synaptic growth at neuromuscular junction	0.00680011	0.04898	4
positive regulation of synapse maturation	0.00680011	0.04898	4
cellular carbohydrate metabolic process	0.00691946	0.049712	36
regulation of developmental growth	0.00696622	0.0498053	48
regulation of type I interferon production	0.00696795	0.0498053	14

## Sheet: Proximal promoters
Description	pvalue	p.adjust	Count
covalent chromatin modification	2.74689e-11	1.58715e-07	80
histone modification	2.23251e-09	4.77373e-06	73
ribonucleoprotein complex biogenesis	2.47857e-09	4.77373e-06	73
regulation of protein catabolic process	1.17969e-08	1.38811e-05	65
gastrulation	1.2012e-08	1.38811e-05	38
ncRNA metabolic process	2.30215e-08	2.21697e-05	74
negative regulation of cell cycle	4.85665e-08	4.00882e-05	72
Wnt signaling pathway	2.68593e-07	0.000155193	67
cell-cell signaling by wnt	3.20301e-07	0.000160337	67
cell cycle phase transition	3.32994e-07	0.000160337	63
proteasomal protein catabolic process	4.08832e-07	0.000167069	70
regulation of DNA metabolic process	4.26243e-07	0.000167069	68
regulation of chromosome organization	4.62636e-07	0.000167069	58
regulation of binding	5.72146e-07	0.000183659	63
negative regulation of T cell differentiation	6.07398e-07	0.000184713	16
regulation of protein stability	6.96457e-07	0.000190824	48
cell junction organization	7.15428e-07	0.000190824	45
mesoderm development	7.26571e-07	0.000190824	27
positive regulation of cell cycle	1.18584e-06	0.000297905	56
protein modification by small protein removal	1.68067e-06	0.000370944	29
mRNA catabolic process	2.22404e-06	0.000414533	38
neural tube development	2.40401e-06	0.000434073	36
ribonucleoprotein complex assembly	2.5485e-06	0.000446218	40
erythrocyte differentiation	2.797e-06	0.000465622	28
regulation of actin cytoskeleton organization	3.57903e-06	0.000521945	54
regulation of apoptotic signaling pathway	3.58534e-06	0.000521945	62
chromatin silencing	3.61332e-06	0.000521945	21
erythrocyte homeostasis	4.88307e-06	0.000615529	29
negative regulation of protein phosphorylation	4.88316e-06	0.000615529	61
regulation of actin filament-based process	5.17297e-06	0.000615529	59
in utero embryonic development	5.20711e-06	0.000615529	71
regulation of protein modification by small protein conjugation or removal	5.60326e-06	0.000643246	40
positive regulation of catabolic process	5.75448e-06	0.000643246	62
establishment of protein localization to organelle	5.91241e-06	0.00064419	57
protein localization to nucleus	6.02047e-06	0.00064419	45
protein targeting	7.13761e-06	0.000718415	43
vesicle organization	8.72477e-06	0.000768333	43
dendrite development	8.90614e-06	0.000768333	47
programmed necrotic cell death	8.97312e-06	0.000768333	13
negative regulation of phosphorylation	9.01402e-06	0.000768333	65
regulation of response to DNA damage stimulus	9.04234e-06	0.000768333	37
neuron apoptotic process	9.76842e-06	0.000817999	47
response to ionizing radiation	1.05029e-05	0.000840739	26
ribonucleoprotein complex subunit organization	1.0622e-05	0.000840739	40
negative regulation of gene expression, epigenetic	1.15593e-05	0.000890528	21
tube formation	1.81452e-05	0.00127857	32
cellular respiration	1.9867e-05	0.00138303	30
regulation of protein complex assembly	2.15648e-05	0.00148335	63
actin filament organization	2.2416e-05	0.00152376	58
mitochondrial transport	2.29898e-05	0.00153206	32
DNA damage checkpoint	2.30685e-05	0.00153206	22
cellular response to radiation	2.49278e-05	0.00157307	29
negative regulation of leukocyte cell-cell adhesion	2.50471e-05	0.00157307	26
chromatin disassembly	2.75209e-05	0.00165642	8
ketone biosynthetic process	2.94861e-05	0.00172091	13
positive regulation of cellular protein localization	3.00032e-05	0.00173358	46
establishment of protein localization to membrane	3.58475e-05	0.00201073	37
stem cell population maintenance	3.65397e-05	0.00201073	30
BMP signaling pathway	3.65397e-05	0.00201073	30
regulation of mRNA stability	3.86289e-05	0.00208596	21
endomembrane system organization	4.08575e-05	0.00216582	55
response to oxidative stress	4.64561e-05	0.00239664	57
negative regulation of transferase activity	4.842e-05	0.00243279	39
positive regulation of GTPase activity	5.01406e-05	0.00249752	36
regulation of GTPase activity	5.302e-05	0.00257404	45
nucleocytoplasmic transport	5.65772e-05	0.00257404	44
nuclear transport	5.65772e-05	0.00257404	44
maintenance of cell number	5.80855e-05	0.00260169	30
embryonic organ development	6.63543e-05	0.00283939	66
DNA repair	7.61432e-05	0.0031647	63
regulation of supramolecular fiber organization	8.08668e-05	0.00326822	50
regulation of neuron apoptotic process	8.09911e-05	0.00326822	41
regulation of intracellular transport	8.1451e-05	0.00326822	60
positive regulation of cell adhesion	8.62547e-05	0.00335801	57
mitotic sister chromatid separation	8.65947e-05	0.00335801	15
leukocyte cell-cell adhesion	8.72941e-05	0.00336257	47
macromolecule deacylation	9.73256e-05	0.00361969	21
cellular response to oxidative stress	0.000104416	0.00376366	41
establishment of protein localization to plasma membrane	0.000106094	0.00376366	15
response to transforming growth factor beta	0.00010786	0.00377707	34
negative regulation of immune system process	0.000110545	0.00380196	63
epithelial cell proliferation	0.00011746	0.00396892	58
negative regulation of nervous system development	0.000123682	0.00404303	51
cellular response to BMP stimulus	0.000124633	0.00404303	30
regulation of chromosome separation	0.00012931	0.00406062	15
positive regulation of cell projection organization	0.000136428	0.00417081	62
regulation of actin filament organization	0.000140546	0.00427409	39
positive regulation of innate immune response	0.000201255	0.00559062	36
metaphase/anaphase transition of cell cycle	0.00022057	0.0059554	14
positive regulation of cellular catabolic process	0.000236603	0.00622781	49
toxin transport	0.000239171	0.00623499	11
telomere organization	0.000266159	0.00678293	23
plasma membrane bounded cell projection assembly	0.000282412	0.00712566	63
negative regulation of lymphocyte activation	0.00032234	0.00795931	26
regulation of cellular amide metabolic process	0.000337457	0.00812427	51
regulation of cellular response to growth factor stimulus	0.000397916	0.00912365	39
cellular nitrogen compound catabolic process	0.000454493	0.0100231	59
epithelial cell migration	0.000532384	0.0113093	40
negative regulation of epithelial cell proliferation	0.000577715	0.0117537	24
epithelium migration	0.000614244	0.0122806	40
vesicle-mediated transport in synapse	0.000628443	0.012393	36
heterocycle catabolic process	0.000632336	0.0124067	59
cortical cytoskeleton organization	0.000645725	0.0124067	12
regulation of translation	0.000646686	0.0124067	45
cellular response to environmental stimulus	0.000650613	0.0124067	41
anoikis	0.000693812	0.0131008	9
regulation of synapse structure or activity	0.000715683	0.0132539	39
regulation of interferon-beta production	0.000781371	0.0142872	12
layer formation in cerebral cortex	0.000847526	0.0151142	6
negative regulation of axon regeneration	0.000847526	0.0151142	6
oxidative phosphorylation	0.000856285	0.0151303	18
regulation of embryonic development	0.00103744	0.0177873	22
glycoprotein metabolic process	0.00107087	0.0180393	45
endothelial cell differentiation	0.00110052	0.0183077	19
regulation of plasma membrane bounded cell projection assembly	0.00111215	0.0183077	28
interferon-beta production	0.00112454	0.0184591	12
negative regulation of cardiac muscle cell apoptotic process	0.00114061	0.0186698	9
regulation of exocytosis	0.00123028	0.0198562	35
glycosaminoglycan biosynthetic process	0.00128224	0.0204601	10
regulation of synapse organization	0.0012854	0.0204601	37
mitotic nuclear division	0.00130481	0.0207121	36
aromatic compound catabolic process	0.00130916	0.0207241	59
vesicle transport along microtubule	0.00134072	0.0209784	11
cell-matrix adhesion	0.00145654	0.0224423	30
establishment of vesicle localization	0.0014986	0.023029	36
mitochondrial respiratory chain complex assembly	0.00150399	0.0230305	15
body morphogenesis	0.00151464	0.0230305	13
generation of precursor metabolites and energy	0.00155301	0.0234289	48
dendrite extension	0.00157127	0.0235775	10
developmental growth involved in morphogenesis	0.0015751	0.0235775	37
p38MAPK cascade	0.00161062	0.023862	11
tight junction organization	0.00161062	0.023862	11
spindle assembly	0.00176279	0.0257634	18
neurotransmitter transport	0.00178133	0.0259258	40
cellular response to hepatocyte growth factor stimulus	0.00181289	0.025928	6
regulation of organelle assembly	0.00183696	0.0262073	30
thymus development	0.00186624	0.0264461	12
endothelium development	0.00186743	0.0264461	20
phosphatidic acid biosynthetic process	0.00189985	0.026644	5
regulation of osteoblast differentiation	0.00196994	0.0270428	23
regulation of cell morphogenesis involved in differentiation	0.00200057	0.0272625	44
regulation of cellular component size	0.00210369	0.0283998	50
positive regulation of chromatin organization	0.0021447	0.028886	19
regulation of focal adhesion assembly	0.0021882	0.0292672	12
tight junction assembly	0.00230739	0.0302316	10
postsynapse organization	0.00231695	0.030288	28
regulation of cell-matrix adhesion	0.00238164	0.0308545	19
response to reactive oxygen species	0.00249333	0.0320857	29
mitochondrial membrane organization	0.00251572	0.0323018	17
C21-steroid hormone biosynthetic process	0.00252973	0.0323682	6
artery development	0.00273673	0.0341529	18
positive regulation of plasma membrane bounded cell projection assembly	0.00273673	0.0341529	18
positive regulation of SMAD protein signal transduction	0.0028772	0.0355224	5
cardiac muscle cell apoptotic process	0.00296829	0.0364911	12
cilium assembly	0.00298342	0.0365992	39
positive regulation of vasculature development	0.00310854	0.0377824	29
neuron projection organization	0.00313904	0.0377862	17
epithelial to mesenchymal transition	0.00319201	0.0381063	21
learning or memory	0.00326958	0.0388717	38
rhythmic process	0.00326958	0.0388717	38
negative regulation of cell projection organization	0.00334037	0.0394696	29
response to hepatocyte growth factor	0.00343998	0.039912	6
regulation of postsynaptic density organization	0.00343998	0.039912	6
regulation of hepatocyte proliferation	0.00343998	0.039912	6
demethylation	0.00370338	0.0423726	11
fibroblast proliferation	0.00373168	0.042612	18
negative regulation of organelle organization	0.00383568	0.0437131	49
positive regulation of protein complex disassembly	0.00386054	0.0438169	8
regulation of cell growth	0.00387368	0.0438169	52
female gamete generation	0.00390436	0.0438169	22
T cell homeostasis	0.00390546	0.0438169	10
visual system development	0.00402792	0.0448427	49
regulation of phagocytosis	0.0043096	0.0472502	17
hepatocyte proliferation	0.00434545	0.0472844	7
epithelial cell proliferation involved in liver morphogenesis	0.00434545	0.0472844	7
cognition	0.00436498	0.0474076	41
protein import	0.00441979	0.0478232	29
regulation of toll-like receptor 4 signaling pathway	0.00457287	0.0483987	6
ventricular septum development	0.0045925	0.0483987	15
mechanoreceptor differentiation	0.0045925	0.0483987	15

## Sheet: UTRs
Description	pvalue	p.adjust	Count
regulation of cell morphogenesis involved in differentiation	9.41971e-11	5.03295e-07	49
protein localization to cell periphery	4.49578e-10	7.27523e-07	48
synapse organization	4.60932e-10	7.27523e-07	57
positive regulation of protein kinase activity	5.44655e-10	7.27523e-07	56
regulation of mitotic cell cycle	9.37909e-10	1.00225e-06	60
positive regulation of neuron differentiation	1.15862e-09	1.03175e-06	57
proteasomal protein catabolic process	2.64534e-09	1.76676e-06	56
negative regulation of phosphorylation	4.71319e-09	2.04494e-06	55
postsynapse organization	4.93841e-09	2.04494e-06	32
ribonucleoprotein complex assembly	4.97312e-09	2.04494e-06	35
positive regulation of cell projection organization	4.97553e-09	2.04494e-06	56
protein localization to plasma membrane	5.55273e-09	2.11916e-06	40
ribonucleoprotein complex subunit organization	2.22834e-08	7.44127e-06	35
regulation of cellular amide metabolic process	2.66353e-08	8.37132e-06	47
covalent chromatin modification	4.41776e-08	1.31134e-05	52
negative regulation of nervous system development	5.68303e-08	1.59813e-05	45
dephosphorylation	6.17165e-08	1.64876e-05	45
developmental growth involved in morphogenesis	6.7884e-08	1.66369e-05	37
regulation of binding	6.85029e-08	1.66369e-05	48
histone modification	8.03211e-08	1.86589e-05	50
regulation of translation	8.66985e-08	1.93012e-05	42
mitotic cell cycle phase transition	1.01867e-07	2.17711e-05	44
negative regulation of protein phosphorylation	1.25808e-07	2.29444e-05	48
mRNA processing	1.27461e-07	2.29444e-05	51
axon extension	1.27686e-07	2.29444e-05	24
regulation of protein localization to membrane	1.29307e-07	2.29444e-05	29
nucleocytoplasmic transport	1.37417e-07	2.29444e-05	38
nuclear transport	1.37417e-07	2.29444e-05	38
intracellular receptor signaling pathway	1.68963e-07	2.73566e-05	30
embryonic organ development	1.97705e-07	3.06113e-05	54
regulation of protein catabolic process	2.0315e-07	3.06113e-05	45
ribonucleoprotein complex biogenesis	2.15676e-07	3.06191e-05	49
protein dephosphorylation	2.29786e-07	3.06191e-05	33
regulation of postsynapse organization	4.3785e-07	5.2511e-05	22
mitotic sister chromatid segregation	4.4226e-07	5.2511e-05	24
chromosome segregation	4.66724e-07	5.30665e-05	39
circadian rhythm	4.99179e-07	5.55649e-05	30
regulation of cell growth	6.02458e-07	6.56925e-05	48
endomembrane system organization	7.46183e-07	7.50497e-05	44
in utero embryonic development	7.61493e-07	7.50497e-05	53
endosomal transport	7.66828e-07	7.50497e-05	29
gliogenesis	8.8883e-07	8.48039e-05	39
circadian regulation of gene expression	1.1773e-06	0.000104838	15
response to transforming growth factor beta	1.41295e-06	0.000121764	29
regulation of microtubule cytoskeleton organization	1.44915e-06	0.000122902	28
mitotic nuclear division	1.64467e-06	0.000135192	33
regulation of protein localization to cell periphery	1.71255e-06	0.000138639	22
protein-containing complex localization	2.10912e-06	0.000163319	32
regulation of cellular component size	2.26101e-06	0.000170149	44
cellular response to transforming growth factor beta stimulus	2.91456e-06	0.000207062	28
response to oxidative stress	2.9453e-06	0.000207062	44
regulation of synapse organization	3.5284e-06	0.000238636	33
regulation of chromosome organization	4.02683e-06	0.000265621	40
negative regulation of catabolic process	4.31658e-06	0.000277873	35
negative regulation of cellular catabolic process	4.96083e-06	0.000301201	31
vesicle organization	5.36733e-06	0.000315139	32
receptor-mediated endocytosis	5.78734e-06	0.000325698	29
viral gene expression	5.78835e-06	0.000325698	13
receptor metabolic process	6.55407e-06	0.000360391	27
cell-cell signaling by wnt	6.61021e-06	0.000360391	45
regulation of protein stability	7.83465e-06	0.00041361	33
regulation of synapse structure or activity	7.83465e-06	0.00041361	33
negative regulation of lipid transport	7.89598e-06	0.00041361	9
positive regulation of catabolic process	8.5905e-06	0.000441337	44
regulation of endocytosis	9.50655e-06	0.000477199	34
regulation of microtubule-based process	1.25349e-05	0.000603369	29
microtubule cytoskeleton organization involved in mitosis	1.36508e-05	0.000636249	20
neuron projection organization	1.36943e-05	0.000636249	17
gene silencing	1.6593e-05	0.000726691	31
regulation of actin filament-based process	1.77459e-05	0.000758531	41
adaptive thermogenesis	1.91927e-05	0.000801146	22
regulation of small molecule metabolic process	2.10227e-05	0.000870731	38
regulation of mRNA metabolic process	2.15267e-05	0.000884747	30
regulation of lipid biosynthetic process	2.49864e-05	0.000996286	23
protein polyubiquitination	2.66195e-05	0.00103236	25
intracellular steroid hormone receptor signaling pathway	2.66443e-05	0.00103236	17
placenta development	2.74921e-05	0.00104178	23
regulation of organelle assembly	2.92429e-05	0.00108686	26
regulation of apoptotic signaling pathway	2.9292e-05	0.00108686	42
stem cell proliferation	3.70192e-05	0.00134049	20
negative regulation of lipid localization	3.71314e-05	0.00134049	10
protein import into nucleus	4.00577e-05	0.00142685	21
epithelial tube morphogenesis	4.27568e-05	0.00151291	39
autophagy	5.70219e-05	0.00188067	39
process utilizing autophagic mechanism	5.70219e-05	0.00188067	39
viral process	6.49453e-05	0.00199876	31
regulation of developmental growth	6.50917e-05	0.00199876	40
DNA damage checkpoint	6.73822e-05	0.00204558	16
negative regulation of transferase activity	7.12309e-05	0.00213813	28
regulation of protein complex assembly	8.25472e-05	0.00237895	43
nucleobase-containing compound catabolic process	8.62333e-05	0.00244848	41
exocytosis	8.75274e-05	0.00244848	38
neural precursor cell proliferation	8.80273e-05	0.00244963	23
positive regulation of cellular catabolic process	9.35336e-05	0.00258938	36
regulation of exocytosis	9.48598e-05	0.00261256	28
receptor internalization	9.78964e-05	0.00266867	18
protein import	9.99186e-05	0.00270998	25
cerebral cortex cell migration	0.00010866	0.00290088	11
regulation of intracellular transport	0.000111938	0.0029608	42
phosphatidylinositol phosphorylation	0.000116182	0.00304295	9
multicellular organism growth	0.000125617	0.00324239	25
cellular response to organic cyclic compound	0.000127063	0.00326394	45
fat cell differentiation	0.000132569	0.00336415	27
negative regulation of organelle organization	0.000136535	0.00342096	39
carboxylic acid biosynthetic process	0.000139048	0.00345551	36
cold-induced thermogenesis	0.000154356	0.00369832	19
regulation of cold-induced thermogenesis	0.000154356	0.00369832	19
response to steroid hormone	0.000168976	0.00395982	25
neuron death	0.000176814	0.00410746	39
negative regulation of small molecule metabolic process	0.000187901	0.00431692	15
regulation of nuclear division	0.000212548	0.00471221	23
regulation of chromosome segregation	0.000263009	0.00553805	15
cellular nitrogen compound catabolic process	0.000280137	0.00584677	42
multicellular organismal homeostasis	0.000282355	0.00586865	44
embryonic digit morphogenesis	0.000287776	0.00586865	12
response to insulin	0.000297239	0.00601572	25
localization within membrane	0.000298506	0.00601856	22
regulation of short-term neuronal synaptic plasticity	0.000302887	0.00603853	6
microtubule-based protein transport	0.000302887	0.00603853	6
establishment of protein localization to organelle	0.00032553	0.0064584	36
response to unfolded protein	0.000326365	0.0064584	15
establishment of organelle localization	0.000329644	0.00646521	43
DNA-templated transcription, elongation	0.000330339	0.00646521	11
regulation of dephosphorylation	0.000369553	0.00707714	20
negative chemotaxis	0.000381049	0.00719416	9
positive regulation of growth	0.000385767	0.00723211	31
regulation of protein dephosphorylation	0.000400002	0.00737028	13
neural tube development	0.000402331	0.00737028	22
lipid homeostasis	0.000408771	0.00740361	18
response to endoplasmic reticulum stress	0.000415479	0.00744934	25
regulation of neuron death	0.000487833	0.00843525	35
nucleic acid transport	0.000574317	0.00947092	18
RNA transport	0.000574317	0.00947092	18
regulation of intracellular protein transport	0.000620134	0.0100989	23
regulation of circadian rhythm	0.000621848	0.0100989	16
negative regulation of supramolecular fiber organization	0.000623754	0.0100992	18
negative regulation of cold-induced thermogenesis	0.000636298	0.0101789	9
myelination	0.000659675	0.0104279	19
microtubule-based transport	0.000659675	0.0104279	19
aromatic compound catabolic process	0.00067554	0.0106472	42
regulation of fat cell differentiation	0.000684801	0.0107614	17
heterocycle catabolic process	0.00069488	0.0108878	41
response to fluid shear stress	0.000727845	0.0113049	6
establishment of RNA localization	0.000733691	0.0113626	18
osteoblast differentiation	0.000757484	0.0115306	22
regulation of cellular ketone metabolic process	0.00081329	0.0122062	16
neuroblast proliferation	0.000849263	0.0124773	11
neuromuscular process controlling balance	0.000849263	0.0124773	11
regulation of sodium ion transport	0.000874841	0.0127365	13
endoplasmic reticulum unfolded protein response	0.0008861	0.0128304	10
ossification	0.000908958	0.0131258	35
regulation of fatty acid biosynthetic process	0.000935862	0.0134779	8
cytoplasmic translation	0.000970983	0.0136886	13
positive regulation of viral process	0.000984512	0.0138064	12
symbiont process	0.00102863	0.0143124	33
axo-dendritic protein transport	0.00104027	0.0143252	5
cellular response to insulin stimulus	0.00113182	0.0153485	21
homeostasis of number of cells	0.00116455	0.0157524	30
negative regulation of carbohydrate metabolic process	0.00117813	0.0158022	9
cofactor biosynthetic process	0.00118006	0.0158022	25
chromatin silencing at rDNA	0.00120875	0.0159861	4
regulation of pancreatic juice secretion	0.00120875	0.0159861	4
positive regulation of chromosome separation	0.00120875	0.0159861	4
cellular response to nutrient levels	0.00129063	0.0168838	21
organelle localization by membrane tethering	0.00137028	0.0175573	11
ameboidal-type cell migration	0.00144763	0.0184271	36
regulation of postsynaptic membrane neurotransmitter receptor levels	0.00144851	0.0184271	13
glucose transmembrane transport	0.00148716	0.0187661	14
maintenance of location	0.00148975	0.0187661	30
regulation of myoblast differentiation	0.00149272	0.0187661	10
negative regulation of epidermal growth factor receptor signaling pathway	0.0015103	0.0187989	6
regeneration	0.00152782	0.0188962	17
regulation of lipid localization	0.00152782	0.0188962	17
synaptic vesicle recycling	0.00153496	0.0189115	11
demethylation	0.00156312	0.0191162	9
epithelial to mesenchymal transition	0.00158382	0.0192316	16
hexose metabolic process	0.00158734	0.0192316	23
cellular response to topologically incorrect protein	0.00159433	0.0192726	13
response to hydrogen peroxide	0.00161926	0.0193927	15
regulation of autophagosome assembly	0.00162361	0.0193927	7
hexose transmembrane transport	0.00162604	0.0193927	14
vesicle docking	0.00168779	0.0200397	10
ribonucleotide biosynthetic process	0.00178339	0.0207489	23
synaptic vesicle maturation	0.00182118	0.0209259	4
asymmetric stem cell division	0.00182118	0.0209259	4
dendritic transport	0.00182118	0.0209259	4
regulation of actin filament organization	0.00184144	0.0211133	25
modification of postsynaptic structure	0.00187755	0.0214812	6
chromosome localization	0.00191295	0.021793	11
response to nutrient levels	0.00203134	0.0228494	33
vesicle budding from membrane	0.00204301	0.0229266	9
organic hydroxy compound biosynthetic process	0.00211603	0.0233112	23
myeloid cell differentiation	0.00217538	0.0238666	35
cholesterol metabolic process	0.00224031	0.0245286	15
regulation of protein complex disassembly	0.00229404	0.0249185	14
response to cholesterol	0.00242958	0.0257564	5
positive regulation of protein localization to membrane	0.0025177	0.0263766	13
negative regulation of cell projection organization	0.00254722	0.0265816	21
ribose phosphate biosynthetic process	0.00264042	0.0272877	23
macromolecule deacylation	0.00274672	0.0280607	13
regulation of cell aging	0.00277028	0.0281936	8
mucopolysaccharide metabolic process	0.00297556	0.029606	9
relaxation of cardiac muscle	0.00362818	0.0341292	4
extracellular exosome biogenesis	0.00389778	0.0361542	5
polysaccharide biosynthetic process	0.00410395	0.0376987	10
positive regulation of multi-organism process	0.00422425	0.0384501	18
DNA repair	0.00430457	0.0390481	38
autophagosome organization	0.00463084	0.0414472	12
regulation of cellular response to oxidative stress	0.00465715	0.0414472	11
membrane protein proteolysis	0.00466796	0.0414472	8
response to hypoxia	0.0046752	0.0414472	20
regulation of chromosome separation	0.0047076	0.0415062	9
synapse maturation	0.00480546	0.0417773	6
negative regulation of protein localization to membrane	0.00480546	0.0417773	6
growth hormone secretion	0.00483011	0.0417773	5
hyaluronan biosynthetic process	0.00487128	0.0417773	4
positive regulation of GTPase activity	0.00496259	0.0420875	21
determination of left/right symmetry	0.00499429	0.0422634	14
vesicle-mediated transport in synapse	0.00516154	0.0432259	23
presynaptic endocytosis	0.00524342	0.0437061	9
epithelial cell proliferation	0.0052922	0.0438391	35
cellular response to drug	0.00537337	0.0444426	32
plasma membrane bounded cell projection assembly	0.00540785	0.0446586	39
response to antibiotic	0.00544154	0.0448675	27
heart morphogenesis	0.00547916	0.0450387	25
neuroepithelial cell differentiation	0.00551346	0.0451816	10
regulation of stem cell proliferation	0.00556334	0.0455206	11
vesicle-mediated transport between endosomal compartments	0.00566476	0.0458944	7
polysaccharide metabolic process	0.00567302	0.0458944	13
positive regulation of chromatin organization	0.00567302	0.0458944	13
negative regulation of response to external stimulus	0.00578483	0.0466189	29
transcytosis	0.00591027	0.0471322	5
extracellular vesicle biogenesis	0.00591027	0.0471322	5
retrograde trans-synaptic signaling	0.00637096	0.0499121	4
postsynaptic signal transduction	0.00637096	0.0499121	4
regulation of relaxation of muscle	0.00637096	0.0499121	4

## Sheet: Introns
Description	pvalue	p.adjust	Count
small GTPase mediated signal transduction	2.93975e-17	1.72358e-13	99
proteasome-mediated ubiquitin-dependent protein catabolic process	1.75565e-12	2.89387e-09	76
synapse organization	1.63842e-11	1.34727e-08	81
actin filament organization	1.73167e-11	1.34727e-08	75
positive regulation of cell projection organization	1.83024e-11	1.34727e-08	83
positive regulation of neuron differentiation	5.75369e-11	3.71706e-08	81
regulation of GTPase activity	6.33986e-11	3.71706e-08	60
nucleocytoplasmic transport	4.91363e-10	2.21605e-07	57
nuclear transport	4.91363e-10	2.21605e-07	57
regulation of apoptotic signaling pathway	1.14832e-09	4.28268e-07	72
regulation of protein complex assembly	1.16873e-09	4.28268e-07	76
negative regulation of phosphorylation	2.16608e-09	7.47043e-07	76
mitotic cell cycle phase transition	2.70365e-09	8.80638e-07	64
negative regulation of protein phosphorylation	3.89364e-09	1.20149e-06	70
regulation of supramolecular fiber organization	5.4117e-09	1.51089e-06	62
protein polyubiquitination	5.70063e-09	1.51922e-06	42
response to transforming growth factor beta	6.25253e-09	1.59385e-06	44
regulation of actin filament-based process	8.76023e-09	2.05445e-06	67
peptidyl-serine phosphorylation	1.07321e-08	2.33046e-06	57
cellular response to nutrient levels	2.08928e-08	4.00055e-06	41
neuron projection organization	2.11525e-08	4.00055e-06	27
regulation of binding	2.21503e-08	4.00068e-06	67
protein localization to cell periphery	2.37065e-08	4.00068e-06	60
positive regulation of GTPase activity	2.38826e-08	4.00068e-06	44
mesenchyme development	2.92035e-08	4.61804e-06	51
cellular response to transforming growth factor beta stimulus	3.12442e-08	4.61804e-06	42
dephosphorylation	3.15063e-08	4.61804e-06	62
postsynapse organization	4.03165e-08	5.25279e-06	40
regulation of mitotic cell cycle	4.60995e-08	5.87568e-06	77
negative regulation of organelle organization	5.08601e-08	6.34453e-06	66
protein localization to plasma membrane	5.38799e-08	6.5812e-06	51
histone modification	5.93665e-08	6.96131e-06	69
regulation of protein catabolic process	6.28309e-08	6.99701e-06	63
protein-containing complex localization	6.32512e-08	6.99701e-06	47
regulation of intracellular transport	7.45579e-08	7.94788e-06	70
positive regulation of cytoskeleton organization	7.87713e-08	8.24708e-06	43
cell-substrate adhesion	8.0553e-08	8.28565e-06	58
regulation of cell morphogenesis involved in differentiation	8.95194e-08	9.04918e-06	58
RNA localization	1.20626e-07	1.19869e-05	36
covalent chromatin modification	1.28135e-07	1.23156e-05	70
regulation of protein localization to membrane	1.71585e-07	1.59683e-05	38
cellular response to oxidative stress	3.09385e-07	2.58721e-05	48
in utero embryonic development	3.30828e-07	2.66807e-05	75
negative regulation of nervous system development	3.53431e-07	2.80022e-05	59
response to amino acid starvation	4.27956e-07	3.34548e-05	16
regulation of microtubule-based process	4.81025e-07	3.71085e-05	43
regulation of synapse organization	5.48379e-07	4.0698e-05	47
regulation of cell-substrate adhesion	5.73961e-07	4.20642e-05	40
autophagy	6.16048e-07	4.29987e-05	61
process utilizing autophagic mechanism	6.16048e-07	4.29987e-05	61
regulation of synapse structure or activity	6.76019e-07	4.55575e-05	48
morphogenesis of embryonic epithelium	7.08517e-07	4.70889e-05	36
negative regulation of catabolic process	7.22043e-07	4.70889e-05	50
developmental growth involved in morphogenesis	7.6542e-07	4.93149e-05	47
response to metal ion	8.54056e-07	5.29813e-05	47
regulation of actin filament organization	9.77177e-07	5.92988e-05	45
fat cell differentiation	9.83894e-07	5.92988e-05	43
regulation of cellular component size	9.91179e-07	5.92988e-05	62
regulation of autophagy	1.10157e-06	6.39457e-05	44
negative regulation of translation	1.92808e-06	0.00010371	29
plasma membrane bounded cell projection assembly	2.09415e-06	0.000109625	71
negative regulation of neuron death	2.17502e-06	0.000112851	43
positive regulation of catabolic process	2.75518e-06	0.000136895	63
mRNA processing	2.82055e-06	0.000138966	66
positive regulation of protein kinase activity	3.03332e-06	0.000146978	65
regulation of intracellular protein transport	3.5088e-06	0.000165373	38
striated muscle tissue development	3.55399e-06	0.000165373	66
negative regulation of cellular amide metabolic process	3.61776e-06	0.000167015	31
neuron death	3.71608e-06	0.000170214	61
establishment or maintenance of cell polarity	4.42122e-06	0.000196095	39
visual system development	5.49121e-06	0.000236728	60
vesicle-mediated transport in synapse	5.83239e-06	0.000247792	42
response to oxidative stress	5.94533e-06	0.000250773	60
neural tube development	6.20924e-06	0.000260034	35
nucleic acid transport	7.35657e-06	0.000299475	29
RNA transport	7.35657e-06	0.000299475	29
stress-activated MAPK cascade	7.69366e-06	0.000308958	43
cellular response to metal ion	8.93928e-06	0.000351751	30
regulation of mRNA metabolic process	9.73918e-06	0.000378151	42
response to hypoxia	9.96322e-06	0.000380365	36
endosomal transport	9.96322e-06	0.000380365	36
cellular response to external stimulus	9.99083e-06	0.000380365	46
endomembrane system organization	1.00971e-05	0.00038193	57
cell-cell signaling by wnt	1.1023e-05	0.000409037	62
establishment of organelle localization	1.22105e-05	0.000447439	67
protein export from nucleus	1.26267e-05	0.000454012	25
viral process	1.2641e-05	0.000454012	45
regulation of protein localization to cell periphery	1.29982e-05	0.000461869	27
negative regulation of cell adhesion	1.826e-05	0.00060145	45
vesicle organization	1.93169e-05	0.000625719	42
ossification	2.02312e-05	0.000648172	56
response to peptide	2.35433e-05	0.000730341	56
cellular response to peptide	2.38933e-05	0.000737296	45
placenta development	2.5238e-05	0.000758823	31
regulation of postsynapse organization	2.65029e-05	0.000784779	25
regulation of DNA-binding transcription factor activity	2.93278e-05	0.000855467	57
locomotory behavior	2.95345e-05	0.00085723	41
regulation of transporter activity	3.08062e-05	0.000885376	42
regulation of chromosome organization	3.99684e-05	0.00109502	52
regulation of fat cell differentiation	4.23103e-05	0.00114303	26
phospholipid metabolic process	4.30645e-05	0.00114767	51
vesicle-mediated transport to the plasma membrane	4.46772e-05	0.00117992	21
myeloid cell differentiation	4.51432e-05	0.00118688	57
gliogenesis	4.95312e-05	0.00126083	48
positive regulation of proteolysis	4.95312e-05	0.00126083	48
glycoprotein biosynthetic process	4.96037e-05	0.00126083	43
protein import	5.09035e-05	0.00127541	35
glycosylation	5.09035e-05	0.00127541	35
actin filament-based movement	5.78357e-05	0.00141288	22
regulation of transmembrane transporter activity	5.91172e-05	0.00143819	40
localization within membrane	6.16328e-05	0.00148096	32
positive regulation of cellular catabolic process	6.28651e-05	0.00148702	51
protein glycosylation	6.66463e-05	0.00154445	33
negative regulation of cell projection organization	7.88287e-05	0.00175731	34
cellular nitrogen compound catabolic process	8.06605e-05	0.00178458	62
symbiont process	8.43539e-05	0.0018454	51
pyrimidine nucleobase metabolic process	9.5207e-05	0.00199357	7
modulation by host of viral genome replication	9.5207e-05	0.00199357	7
regulation of plasma membrane bounded cell projection assembly	9.65052e-05	0.00200642	31
regulation of morphogenesis of an epithelium	0.000102808	0.0021224	22
negative regulation of transferase activity	0.000103446	0.00212809	38
organophosphate biosynthetic process	0.000104547	0.00213791	66
carboxylic acid biosynthetic process	0.000104653	0.00213791	51
neural precursor cell proliferation	0.000107107	0.0021654	31
vesicle budding from membrane	0.000118572	0.00230195	14
myeloid cell homeostasis	0.000122361	0.00236767	30
regulation of chromosome separation	0.000127819	0.00241161	15
regulation of macroautophagy	0.000127923	0.00241161	21
protein heterooligomerization	0.000142641	0.00261345	28
regulation of endocytosis	0.000144374	0.00263697	43
positive regulation of growth	0.00014499	0.00263999	45
aromatic compound catabolic process	0.000154135	0.00278918	63
neuronal stem cell division	0.000157126	0.00280862	7
neuroblast division	0.000157126	0.00280862	7
establishment of protein localization to organelle	0.000167544	0.00294104	52
maintenance of location	0.000180488	0.00311812	46
regulation of protein stability	0.000180599	0.00311812	41
developmental maturation	0.000196173	0.00334349	44
regulation of dephosphorylation	0.000196881	0.00334584	28
epithelial cell proliferation	0.000206716	0.00346279	57
heterocycle catabolic process	0.000207702	0.00346939	61
vesicle localization	0.00021136	0.00350058	41
ameboidal-type cell migration	0.000217655	0.00359346	55
metaphase/anaphase transition of cell cycle	0.000218194	0.00359346	14
ribonucleoprotein complex localization	0.000224788	0.00366092	15
osteoblast differentiation	0.000225984	0.0036702	32
positive regulation of hemopoiesis	0.000235064	0.00380713	33
regulation of chromosome segregation	0.000242282	0.00386795	20
positive regulation of protein localization to membrane	0.000242282	0.00386795	20
response to fluid shear stress	0.000246342	0.00389301	8
response to sterol	0.000246342	0.00389301	8
positive regulation of epithelial cell migration	0.00029083	0.00445206	25
response to topologically incorrect protein	0.000295449	0.00449971	23
positive regulation of long-term synaptic potentiation	0.000296245	0.00449971	9
regulation of membrane potential	0.000306271	0.00460427	58
Golgi vesicle budding	0.000311377	0.00465715	10
positive regulation of cell growth	0.000314497	0.00469184	31
mitotic sister chromatid separation	0.000318907	0.00473354	14
mitotic nuclear division	0.000333271	0.00490947	38
regulation of epithelial cell proliferation	0.000344517	0.00506241	49
establishment of protein localization to plasma membrane	0.000382665	0.00546073	14
regulation of developmental growth	0.000452712	0.00621714	53
vesicle-mediated transport between endosomal compartments	0.000480117	0.00647518	11
modulation by virus of host morphology or physiology	0.00048751	0.00655567	8
regulation of neurotransmitter levels	0.000492794	0.00659647	50
stem cell population maintenance	0.000508547	0.00676102	27
ribonucleoprotein complex subunit organization	0.000525932	0.00691377	35
synaptic vesicle endocytosis	0.000543272	0.00701597	14
presynaptic endocytosis	0.000543272	0.00701597	14
regulation of cardiac muscle contraction by calcium ion signaling	0.000543792	0.00701597	6
amyloid precursor protein metabolic process	0.000544477	0.00701597	13
lipid localization	0.000609568	0.00775249	49
regulation of focal adhesion assembly	0.00065244	0.00819113	13
response to endoplasmic reticulum stress	0.000663074	0.00824425	34
modulation by host of viral process	0.000665108	0.00824425	8
negative regulation of protein localization to membrane	0.000688586	0.00849932	9
multicellular organism growth	0.000706203	0.00864398	32
negative regulation of locomotion	0.000719972	0.00877588	45
maintenance of cell number	0.000743818	0.009029	27
ribonucleoprotein complex biogenesis	0.00075526	0.00914583	55
negative regulation of cytosolic calcium ion concentration	0.000791587	0.00945229	7
neuromuscular process	0.000804083	0.00956256	23
negative regulation of response to wounding	0.000821531	0.00975027	17
negative regulation of potassium ion transport	0.000826466	0.00976929	10
receptor-mediated endocytosis	0.000835949	0.00986151	33
postsynaptic actin cytoskeleton organization	0.000842848	0.00986351	6
postsynaptic cytoskeleton organization	0.000842848	0.00986351	6
nuclear migration	0.000888142	0.0102187	9
modification of postsynaptic structure	0.000891357	0.0102187	8
pri-miRNA transcription by RNA polymerase II	0.000931455	0.0105631	12
regulation of mRNA stability	0.000959619	0.0108086	18
lipid transport	0.00107838	0.0118622	44
artery development	0.00108707	0.0119075	19
cofactor biosynthetic process	0.00120849	0.0128819	35
cellular response to sterol	0.00125428	0.0131085	6
substrate adhesion-dependent cell spreading	0.00138152	0.0141112	18
negative regulation of cell activation	0.0014333	0.014564	30
microtubule-based transport	0.00144191	0.0145757	25
adult locomotory behavior	0.00153086	0.0152903	19
fibroblast proliferation	0.00153086	0.0152903	19
ribonucleoprotein complex assembly	0.00154243	0.0153797	32
maintenance of location in cell	0.00155319	0.0154345	18
regulation of actomyosin structure organization	0.00155319	0.0154345	18
roof of mouth development	0.00155694	0.0154397	17
response to type I interferon	0.00155898	0.0154397	10
negative regulation of response to external stimulus	0.00174635	0.0169237	44
response to radiation	0.00175609	0.0169662	50
vascular endothelial growth factor signaling pathway	0.00178213	0.0171067	9
positive regulation of receptor recycling	0.00180316	0.0171067	6
regulation of synapse assembly	0.00184461	0.0174435	20
regulation of osteoblast differentiation	0.00194377	0.0180607	23
negative regulation of establishment of protein localization	0.00210247	0.0192305	30
regulation of response to DNA damage stimulus	0.00226448	0.0202697	30
neurotransmitter metabolic process	0.00233113	0.0207396	23
receptor metabolic process	0.00245579	0.0216842	29
cellular response to topologically incorrect protein	0.00248851	0.0217764	17
regulation of response to cytokine stimulus	0.00260963	0.0224573	19
mitochondrion morphogenesis	0.00263222	0.0225295	7
organic cation transport	0.00270056	0.0229758	9
circadian regulation of gene expression	0.00270788	0.0229758	13
regulation of cysteine-type endopeptidase activity	0.00277715	0.0234617	31
SMAD protein complex assembly	0.00286402	0.0237545	5
intracellular mRNA localization	0.00286402	0.0237545	5
regulation of modification of postsynaptic structure	0.00286402	0.0237545	5
multi-organism behavior	0.00319273	0.0256424	14
face development	0.00340619	0.026842	12
cell migration in hindbrain	0.00342203	0.0268586	6
cranial skeletal system development	0.00355818	0.0277046	13
negative regulation of lymphocyte activation	0.00359504	0.0279175	23
T cell receptor signaling pathway	0.00366675	0.0283992	20
drug transport	0.00379217	0.0290634	29
regulation of ossification	0.00381757	0.0292199	32
T-helper 17 type immune response	0.00383593	0.0292342	8
synapse assembly	0.0039221	0.0296662	26
regulation of glial cell proliferation	0.00395791	0.0298268	9
vasculogenesis	0.00397121	0.0298886	16
visual learning	0.004058	0.0303209	13
apoptotic mitochondrial changes	0.0040787	0.0304242	18
hyaluronan biosynthetic process	0.00415304	0.0307053	5
regulation of vascular smooth muscle cell differentiation	0.00415304	0.0307053	5
negative regulation of T cell activation	0.00426308	0.0314396	19
circadian rhythm	0.00435615	0.0317663	29
carbohydrate biosynthetic process	0.00449999	0.0326354	27
body morphogenesis	0.00450872	0.0326354	12
regulation of synaptic vesicle cycle	0.00456536	0.0328023	22
sulfur compound biosynthetic process	0.00461782	0.0330982	14
protein localization to centrosome	0.00470113	0.0335061	8
purine-containing compound metabolic process	0.00470332	0.0335061	57
negative regulation of cellular component movement	0.00470946	0.0335065	40
macromolecule deacylation	0.0047221	0.0335065	17
response to reactive oxygen species	0.00475394	0.0335811	28
neuron migration	0.00489804	0.0345574	26
cerebral cortex cell migration	0.00495068	0.0347615	11
regulation of cytokinesis	0.00519351	0.0361634	14
selective autophagy	0.00534581	0.0367438	10
tight junction organization	0.00534581	0.0367438	10
regulation of circadian rhythm	0.00561633	0.0381117	19
regulation of transforming growth factor beta production	0.00570834	0.0382513	8
protein localization to microtubule organizing center	0.00570834	0.0382513	8
response to anesthetic	0.00570866	0.0382513	11
leukocyte cell-cell adhesion	0.00583253	0.0385526	40
cellular response to ionizing radiation	0.00587953	0.0387323	12
regulation of platelet aggregation	0.00592797	0.0388332	6
mitochondrial membrane organization	0.0060488	0.0395363	16
positive regulation of plasma membrane bounded cell projection assembly	0.00634012	0.0410742	17
axonal transport	0.00655506	0.0421014	11
neuron-neuron synaptic transmission	0.00661358	0.0421014	4
cellular response to vitamin D	0.00661358	0.0421014	4
negative regulation of chromosome separation	0.00665045	0.0422099	9
response to tumor necrosis factor	0.00710543	0.0445552	25
regulation of neurotransmitter transport	0.00710543	0.0445552	25
cortical cytoskeleton organization	0.00721805	0.0451167	10
cellular response to oxygen levels	0.00737309	0.0459388	20
ribose phosphate metabolic process	0.00744997	0.0463194	52
SNARE complex assembly	0.00758749	0.0464358	6
establishment of spindle localization	0.00780476	0.047419	9
response to progesterone	0.00787807	0.0477654	5
modification of postsynaptic actin cytoskeleton	0.00787807	0.0477654	5
regulation of neurotransmitter secretion	0.0079984	0.0483949	20
cardiocyte differentiation	0.00816237	0.0493146	25
transforming growth factor beta production	0.0082054	0.0493146	8
membrane protein proteolysis	0.00832612	0.0496098	10
collagen metabolic process	0.0083803	0.0498313	17
