# Supplementary material for: Whole-genome epigenetic function annotation through sgRNA libraries synthesized by controlled template-dependent elongation
Source: Research Square preprint supplement (doi:10.21203/rs.3.rs-100657/v1), 2020-11-05
Supplement: Supplementary file 8 [file TableS7.xlsx]

## Sheet: Exons
Description	pvalue	p.adjust	Count
ncRNA metabolic process	4.93973e-21	2.27475e-17	64
ribonucleoprotein complex biogenesis	8.45023e-11	7.78266e-08	45
negative regulation of cell cycle	1.38036e-09	7.94572e-07	44
regulation of organelle assembly	2.23975e-08	1.03141e-05	26
histone modification	2.15048e-07	7.61767e-05	38
DNA repair	2.54592e-07	7.9608e-05	40
cell cycle checkpoint	2.59309e-07	7.9608e-05	22
blastocyst development	3.40855e-07	8.40922e-05	20
autophagy	3.65221e-07	8.40922e-05	35
process utilizing autophagic mechanism	3.65221e-07	8.40922e-05	35
covalent chromatin modification	5.73435e-07	0.00012003	38
centrosome cycle	1.50894e-06	0.00028473	17
regulation of autophagy	2.78166e-06	0.000474428	25
protein localization to nucleus	4.75112e-06	0.000705771	26
regulation of mitotic cell cycle phase transition	6.04595e-06	0.000843684	25
nuclear-transcribed mRNA catabolic process, exonucleolytic, 3'-5'	1.21216e-05	0.00159485	5
nucleocytoplasmic transport	1.32646e-05	0.00160747	26
nuclear transport	1.32646e-05	0.00160747	26
protein localization to microtubule organizing center	1.95395e-05	0.00209254	8
sister chromatid segregation	2.02035e-05	0.00210363	19
protein export from nucleus	2.11748e-05	0.00211978	15
transcription by RNA polymerase III	2.45449e-05	0.00235478	8
establishment of protein localization to organelle	3.15207e-05	0.00290306	30
cellular component disassembly	6.95377e-05	0.00516486	28
nuclear pore organization	8.55134e-05	0.00604249	5
cellular response to extracellular stimulus	0.000146238	0.00922502	20
regulation of binding	0.000236181	0.0135952	29
regulation of Rac protein signal transduction	0.000241852	0.0137497	5
developmental growth involved in morphogenesis	0.000249589	0.0140166	22
regulation of chromosome segregation	0.000268143	0.0141016	12
positive regulation of mitophagy	0.000279405	0.0141016	4
regulation of protein localization to centrosome	0.000279405	0.0141016	4
mitotic spindle assembly checkpoint	0.000281725	0.0141016	7
mitotic spindle checkpoint	0.000281725	0.0141016	7
regulation of chromosome separation	0.00032284	0.0159275	9
positive regulation of TOR signaling	0.00033486	0.0162319	7
developmental cell growth	0.000382871	0.0181765	21
regulation of mitotic metaphase/anaphase transition	0.000402315	0.0185621	8
cellular response to external stimulus	0.000580181	0.0237034	22
positive regulation of cell cycle process	0.000586793	0.0237034	20
negative regulation of muscle adaptation	0.000622158	0.0238903	4
lateral ventricle development	0.000622158	0.0238903	4
negative regulation of chromosome separation	0.000632924	0.0238903	7
nucleic acid transport	0.000672964	0.0245548	14
RNA transport	0.000672964	0.0245548	14
response to mitochondrial depolarisation	0.000706771	0.0246567	5
ribonucleoprotein complex subunit organization	0.000771785	0.0261329	19
organelle fission	0.000781566	0.0262709	30
establishment of RNA localization	0.000824375	0.0273111	14
vacuolar transport	0.000858841	0.027701	13
negative regulation of autophagosome assembly	0.000873505	0.027701	4
response to starvation	0.000878251	0.027701	15
regulation of cellular component size	0.00104542	0.0312609	27
regulation of transcription by RNA polymerase I	0.00113112	0.0328705	6
regulation of gene expression, epigenetic	0.00120605	0.0342831	21
dephosphorylation	0.00122738	0.0344639	25
protein import	0.00133711	0.0362199	17
macromolecule methylation	0.00143628	0.0382489	21
cellular response to unfolded protein	0.00145941	0.0386241	9
mammary gland epithelium development	0.00160154	0.0416673	9
lipid phosphorylation	0.00162587	0.0420625	7
negative regulation of stem cell differentiation	0.00164061	0.0422067	5
neural tube closure	0.00172166	0.0440458	11
tube closure	0.00185301	0.0468853	11
meiotic chromosome segregation	0.00200714	0.0499568	10
regulation of mitotic spindle organization	0.00205866	0.0499568	6
maintenance of protein localization in organelle	0.00205866	0.0499568	6
regulation of synapse structure or activity	0.00206095	0.0499568	20

## Sheet: Proximal promoters
Description	pvalue	p.adjust	Count
regulation of apoptotic signaling pathway	1.89036e-09	1.09716e-05	70
small GTPase mediated signal transduction	1.52583e-07	0.000442796	73
embryonic organ development	1.92072e-06	0.00292225	70
protein autophosphorylation	3.1833e-06	0.00307931	41
ameboidal-type cell migration	7.07843e-06	0.0051354	59
regulation of receptor internalization	3.00737e-05	0.0109092	17
regulation of protein autophosphorylation	3.63287e-05	0.0118528	13
response to endoplasmic reticulum stress	3.67593e-05	0.0118528	37
positive regulation of muscle cell differentiation	6.08412e-05	0.0178557	19
cellular component disassembly	6.69936e-05	0.0178557	50
visual system development	6.76818e-05	0.0178557	55
regulation of endocytosis	7.37132e-05	0.0184898	43
protein stabilization	8.26728e-05	0.0184898	29
regulation of neuron death	0.000100075	0.0215123	51
positive regulation of cell cycle arrest	0.000107808	0.0215765	11
regulation of cell growth	0.000129254	0.0250063	57
cell-substrate adhesion	0.000158133	0.0270275	47
receptor metabolic process	0.000158328	0.0270275	32
fat cell differentiation	0.000183663	0.0288103	36
contractile actin filament bundle assembly	0.000213558	0.0295727	20
stress fiber assembly	0.000213558	0.0295727	20
leukocyte activation involved in immune response	0.000231015	0.0295727	39
nucleocytoplasmic transport	0.000241806	0.0295727	41
nuclear transport	0.000241806	0.0295727	41
regionalization	0.00024662	0.0295727	50
regulation of membrane potential	0.000251948	0.0295727	57
sex differentiation	0.000260457	0.029641	41
negative regulation of phosphorylation	0.000270523	0.0300828	58
lipid storage	0.000274756	0.0300828	15
cellular response to lithium ion	0.000283359	0.0300828	6
neuron death	0.00029973	0.0305199	53
plasma lipoprotein particle clearance	0.000316907	0.031175	10
lipid homeostasis	0.000369101	0.032484	24
cell-cell signaling by wnt	0.000369391	0.032484	55
negative regulation of locomotion	0.000381759	0.0326594	45
regulation of binding	0.000398204	0.0326594	52
ossification	0.000433756	0.0344866	50
response to lithium ion	0.000462111	0.0353337	6
eye photoreceptor cell development	0.000462674	0.0353337	11
regulation of cysteine-type endopeptidase activity involved in apoptotic process	0.000495955	0.0369041	30
positive regulation of signal transduction by p53 class mediator	0.000543632	0.0399398	8
mesenchymal cell differentiation	0.000588431	0.0408444	32
positive regulation of kinase activity	0.000589445	0.0408444	59
calcium-dependent cell-cell adhesion via plasma membrane cell adhesion molecules	0.000653187	0.0440826	10

## Sheet: UTRs
Description	pvalue	p.adjust	Count
neuron recognition	2.69985e-07	0.000514053	10
positive regulation of neuron differentiation	2.99024e-07	0.000514053	31
axonogenesis	4.35117e-07	0.000514053	31
synapse organization	5.55411e-07	0.000514053	30
epithelial cell proliferation	5.83488e-07	0.000514053	29
embryonic organ development	1.26604e-06	0.000929484	31
regulation of epithelial cell proliferation	2.29787e-06	0.00139954	25
dephosphorylation	2.80261e-06	0.00139954	25
regulation of JNK cascade	3.456e-06	0.00152237	17
regulation of stress-activated protein kinase signaling cascade	4.6089e-06	0.00166163	19
protein dephosphorylation	4.90378e-06	0.00166163	19
regulation of transmembrane transporter activity	1.40949e-05	0.0038805	19
regulation of muscle adaptation	2.26475e-05	0.00525065	11
regulation of transporter activity	2.42091e-05	0.00529727	19
peptidyl-serine phosphorylation	2.52538e-05	0.00529727	21
positive regulation of chemotaxis	3.64565e-05	0.00669129	13
developmental maturation	5.3803e-05	0.00911547	20
positive regulation of sodium ion transport	6.00155e-05	0.00979142	7
positive regulation of cell projection organization	7.13109e-05	0.0100392	26
homophilic cell adhesion via plasma membrane adhesion molecules	7.32305e-05	0.0100392	11
positive regulation of cold-induced thermogenesis	0.000109797	0.0112478	10
regulation of peptidyl-serine phosphorylation	0.000126737	0.0121364	13
phosphatidic acid biosynthetic process	0.000143101	0.0128834	4
neuron death	0.00014581	0.0128834	23
regulation of peptide hormone secretion	0.000153792	0.0132834	16
cardiac muscle hypertrophy	0.000167964	0.0141556	10
vascular endothelial growth factor signaling pathway	0.000173301	0.0141556	6
positive regulation of growth	0.000197753	0.0155554	19
positive regulation of developmental growth	0.000224797	0.0169608	15
nucleocytoplasmic transport	0.000236079	0.0169608	18
nuclear transport	0.000236079	0.0169608	18
cellular response to vascular endothelial growth factor stimulus	0.000241647	0.0169608	7
positive regulation of response to external stimulus	0.000242573	0.0169608	19
positive regulation of kinase activity	0.000256158	0.0173596	25
developmental growth involved in morphogenesis	0.000305691	0.0183966	17
proteasomal protein catabolic process	0.000338116	0.0190949	24
dendrite extension	0.000424689	0.0217936	6
positive regulation of angiogenesis	0.000590009	0.0278626	13
negative regulation of neuron differentiation	0.000632474	0.0290213	16
cellular response to hexose stimulus	0.000686058	0.0308103	11
regulation of neuron death	0.000694481	0.0308103	20
endothelial cell chemotaxis	0.000699439	0.0308103	5
establishment or maintenance of cytoskeleton polarity	0.000788273	0.032732	4
regionalization	0.000793506	0.032732	20
hormone transport	0.000793506	0.032732	20
epithelial tube morphogenesis	0.000964783	0.0392256	20
aldehyde biosynthetic process	0.000979527	0.0392256	4
endomembrane system organization	0.00106172	0.0417579	20
in utero embryonic development	0.00115764	0.0440722	24
nucleobase-containing compound transport	0.00135436	0.0491879	12
locomotory behavior	0.00139436	0.0491879	15
insulin secretion involved in cellular response to glucose stimulus	0.00140601	0.0491879	8
adaptive thermogenesis	0.00140696	0.0491879	11
negative regulation of apoptotic signaling pathway	0.00143728	0.0493259	14

## Sheet: Introns
Description	pvalue	p.adjust	Count
small GTPase mediated signal transduction	7.3943e-19	4.31088e-15	102
dendrite development	3.26526e-14	4.75912e-11	66
synapse organization	9.53007e-14	9.26006e-11	86
positive regulation of cell projection organization	1.40421e-11	9.60054e-09	83
regulation of membrane potential	1.41933e-11	9.60054e-09	80
positive regulation of neuron differentiation	1.77955e-11	1.03748e-08	82
negative regulation of cellular component movement	3.59401e-11	1.90483e-08	63
regulation of cellular component size	6.48666e-11	3.15143e-08	73
protein autophosphorylation	7.60627e-11	3.16747e-08	52
response to metal ion	8.81798e-11	3.42725e-08	56
ameboidal-type cell migration	1.8765e-10	6.44828e-08	73
regulation of actin filament-based process	1.88029e-10	6.44828e-08	71
regulation of synapse structure or activity	6.23547e-10	1.9133e-07	55
regulation of GTPase activity	1.19242e-09	3.31038e-07	57
regulation of synapse organization	1.27181e-09	3.3703e-07	53
cell-substrate adhesion	1.72705e-09	4.37769e-07	62
negative regulation of locomotion	2.178e-09	5.29071e-07	61
neuromuscular process controlling balance	3.11348e-09	6.98137e-07	23
actin filament organization	3.57975e-09	7.72961e-07	69
plasma membrane bounded cell projection assembly	4.46223e-09	9.29101e-07	79
developmental growth involved in morphogenesis	5.42031e-09	1.05335e-06	52
regulation of actin cytoskeleton organization	7.921e-09	1.48966e-06	61
regulation of supramolecular fiber organization	1.11133e-08	1.96335e-06	61
locomotory behavior	1.79862e-08	3.08411e-06	49
regulation of long-term synaptic potentiation	1.86459e-08	3.10587e-06	19
negative regulation of nervous system development	2.3414e-08	3.59221e-06	62
developmental cell growth	3.02341e-08	4.51882e-06	49
regulation of cell morphogenesis involved in differentiation	3.10039e-08	4.51882e-06	59
regulation of ion transmembrane transport	4.44264e-08	5.99956e-06	74
forebrain development	4.52797e-08	5.99956e-06	64
regulation of actin filament organization	4.89642e-08	6.34359e-06	48
epithelium migration	8.27122e-08	9.46979e-06	51
regulation of plasma membrane bounded cell projection assembly	8.28404e-08	9.46979e-06	38
regulation of cell projection assembly	1.1187e-07	1.16465e-05	38
response to oxidative stress	1.14566e-07	1.17179e-05	65
localization within membrane	1.5023e-07	1.48447e-05	38
multicellular organismal response to stress	2.59347e-07	2.36249e-05	25
learning or memory	4.50025e-07	4.03638e-05	50
visual system development	5.04543e-07	4.39028e-05	63
positive regulation of cell adhesion	5.66382e-07	4.85589e-05	64
regulation of neurological system process	5.85099e-07	4.94366e-05	35
muscle cell differentiation	6.39329e-07	5.29427e-05	62
regulation of cell growth	6.44756e-07	5.29427e-05	66
neural precursor cell proliferation	8.25088e-07	6.55307e-05	36
vesicle-mediated transport in synapse	8.5458e-07	6.55307e-05	44
postsynapse organization	8.65499e-07	6.55307e-05	37
organ growth	9.43921e-07	6.9659e-05	40
muscle tissue development	1.09642e-06	7.99014e-05	70
protein localization to cell periphery	1.35839e-06	9.42789e-05	55
positive regulation of kinase activity	1.49585e-06	0.000101405	70
monovalent inorganic cation transport	1.88236e-06	0.000123305	68
protein polymerization	1.97816e-06	0.000126732	46
neuron migration	2.29681e-06	0.000143983	35
cellular response to insulin stimulus	2.68256e-06	0.000159585	36
establishment of organelle localization	2.75076e-06	0.000160369	69
positive regulation of GTPase activity	3.10394e-06	0.000174	39
establishment or maintenance of cell polarity	3.90606e-06	0.000213601	39
chondrocyte differentiation	4.29519e-06	0.000229734	26
substrate adhesion-dependent cell spreading	5.26116e-06	0.000273862	23
exocytosis	6.27415e-06	0.000312635	57
regulation of vascular permeability	6.67128e-06	0.000326837	12
synaptic vesicle cycle	6.82265e-06	0.000331467	39
cellular divalent inorganic cation homeostasis	8.00346e-06	0.000370988	70
cellular response to metal ion	8.07213e-06	0.000370988	30
negative regulation of response to external stimulus	8.08156e-06	0.000370988	52
muscle cell proliferation	8.25836e-06	0.000376143	40
hormone secretion	8.50067e-06	0.000382415	55
regulation of neurotransmitter levels	8.59285e-06	0.000382415	56
hormone transport	8.59285e-06	0.000382415	56
regulation of developmental growth	8.73838e-06	0.00038455	59
cell-cell adhesion via plasma-membrane adhesion molecules	8.88485e-06	0.00038455	36
regulation of metal ion transport	1.0158e-05	0.000420007	61
synapse assembly	1.12424e-05	0.000456123	33
regulation of regulated secretory pathway	1.12868e-05	0.000456123	34
rhythmic process	1.26506e-05	0.000494988	46
neurotransmitter transport	1.30816e-05	0.000508438	47
positive regulation of plasma membrane bounded cell projection assembly	1.46721e-05	0.000562752	23
protein localization to synapse	1.48249e-05	0.000564898	20
response to insulin	1.64085e-05	0.000607134	38
proteoglycan biosynthetic process	1.64541e-05	0.000607134	15
cell-cell signaling by wnt	1.82722e-05	0.000657574	61
cellular response to oxidative stress	1.96044e-05	0.00069269	43
lipid localization	2.19699e-05	0.000766973	54
negative regulation of cytoskeleton organization	2.22054e-05	0.000770581	29
response to wounding	2.28134e-05	0.000786995	68
regulation of postsynapse organization	2.42897e-05	0.000828122	25
adult behavior	2.5397e-05	0.000855684	33
vocalization behavior	2.62926e-05	0.00087592	8
calcium ion homeostasis	3.02959e-05	0.00100088	67
phospholipid metabolic process	3.76249e-05	0.00118569	51
cardiac muscle tissue development	4.15524e-05	0.00126172	41
neuronal action potential	4.71181e-05	0.00140152	13
response to reactive oxygen species	4.7404e-05	0.00140287	34
gastrulation	5.18013e-05	0.0015176	30
morphogenesis of an epithelial sheet	5.2813e-05	0.00153407	15
regulation of endocytosis	6.28034e-05	0.00174354	44
regulation of actomyosin structure organization	6.6062e-05	0.00182531	21
negative regulation of response to wounding	8.48997e-05	0.00222957	19
protein localization to postsynaptic specialization membrane	9.28466e-05	0.00238456	10
neurotransmitter receptor localization to postsynaptic specialization membrane	9.28466e-05	0.00238456	10
receptor metabolic process	0.000110273	0.00268991	33
positive regulation of growth	0.000128819	0.00306536	45
muscle system process	0.000132383	0.00311399	54
regulation of protein localization to membrane	0.000132465	0.00311399	31
regeneration	0.000134151	0.00312839	26
microtubule-based movement	0.000137712	0.00318596	41
signal release from synapse	0.00014645	0.00334824	31
regulation of circadian rhythm	0.000147964	0.00336965	23
in utero embryonic development	0.000157656	0.00354593	65
negative chemotaxis	0.000168654	0.0037386	12
regulation of protein binding	0.000181955	0.00397303	37
regulation of mitotic cell cycle	0.000194068	0.00417496	64
positive regulation of transporter activity	0.000212195	0.00453148	22
multicellular organismal signaling	0.000214517	0.00454141	25
positive regulation of cytoskeleton organization	0.000240865	0.00490994	34
regulation of protein localization to cell periphery	0.000242873	0.00493362	24
regulation of synapse assembly	0.00027274	0.00541794	22
postsynaptic specialization assembly	0.000284869	0.0055731	9
glycosaminoglycan biosynthetic process	0.000289186	0.00560117	11
behavioral defense response	0.000291152	0.00562059	13
postsynapse assembly	0.000298498	0.00568708	10
auditory behavior	0.000324776	0.00610789	6
synaptic vesicle localization	0.000333037	0.0062231	30
multi-organism behavior	0.000346689	0.0064575	16
negative regulation of chemotaxis	0.0003548	0.00648427	13
homotypic cell-cell adhesion	0.000359051	0.00654146	15
postsynaptic specialization organization	0.000365997	0.00658568	11
regulation of microtubule-based process	0.000375195	0.00667861	35
negative regulation of cellular amide metabolic process	0.000400515	0.00705439	26
cellular modified amino acid metabolic process	0.000405812	0.00708024	28
T cell differentiation	0.000409269	0.00708024	39
neuron projection organization	0.000426408	0.00731164	19
cerebral cortex cell migration	0.000429904	0.00732848	13
protein localization to postsynaptic membrane	0.000429904	0.00732848	13
response to transforming growth factor beta	0.000461847	0.00780454	32
positive regulation of DNA-binding transcription factor activity	0.000479988	0.00800553	36
circulatory system process	0.000480606	0.00800553	62
calcium ion transport into cytosol	0.0004906	0.00814871	26
anatomical structure homeostasis	0.000495264	0.00820281	52
regulation of receptor internalization	0.000499268	0.00824571	15
maintenance of location	0.000580672	0.0093517	44
response to hypoxia	0.000586203	0.00938154	31
synaptic vesicle transport	0.00059218	0.00938154	28
regulation of cardiac muscle cell proliferation	0.000610559	0.00954306	12
reflex	0.000642325	0.00970144	8
sensory perception of pain	0.000651216	0.0098103	24
cellular response to transforming growth factor beta stimulus	0.00069432	0.0103527	31
plasma membrane organization	0.000711811	0.0105007	19
dephosphorylation	0.000715999	0.0105145	48
cell adhesion mediated by integrin	0.000719771	0.0105434	14
glycosaminoglycan metabolic process	0.000738127	0.0107163	16
mucopolysaccharide metabolic process	0.000740769	0.0107163	13
response to auditory stimulus	0.000767169	0.0110036	7
organophosphate biosynthetic process	0.000768953	0.0110036	62
negative regulation of cell cycle	0.00077006	0.0110036	57
regulation of postsynaptic membrane neurotransmitter receptor levels	0.000796377	0.011134	18
regulation of organelle assembly	0.000819563	0.0112984	31
positive regulation of interleukin-2 production	0.000855409	0.0116203	9
negative regulation of phosphorylation	0.000857072	0.0116203	57
modification of postsynaptic structure	0.000861165	0.0116217	8
regulation of smooth muscle cell proliferation	0.000875826	0.0117381	26
protein monoubiquitination	0.000988456	0.0129499	14
negative regulation of protein phosphorylation	0.00110721	0.0142811	52
respiratory burst	0.00113597	0.0145235	8
regulation of intracellular transport	0.00115129	0.014618	55
cAMP biosynthetic process	0.0011559	0.014618	5
regulation of neurotransmitter receptor localization to postsynaptic specialization membrane	0.00122039	0.0151703	6
primary amino compound metabolic process	0.00122039	0.0151703	6
negative regulation of epithelial cell proliferation	0.00124225	0.0153764	23
neuroblast proliferation	0.00133679	0.0163044	14
positive regulation of myelination	0.00145737	0.0174466	7
p38MAPK cascade	0.00153143	0.0180004	11
regulation of lipid kinase activity	0.00153143	0.0180004	11
positive regulation of neuron death	0.00156132	0.0182415	20
neuron death	0.00159532	0.0186014	51
sulfur compound metabolic process	0.00161331	0.0187736	37
regulation of muscle tissue development	0.00165699	0.0192436	27
purine-containing compound metabolic process	0.00167677	0.0193563	59
negative regulation of growth	0.00167998	0.0193563	38
regulation of protein catabolic process	0.00170748	0.0195957	48
cyclic nucleotide metabolic process	0.0017185	0.0196064	9
microtubule polymerization or depolymerization	0.00173404	0.0197065	20
negative regulation of translation	0.00174874	0.0197964	22
regulation of modification of synaptic structure	0.00175512	0.0198301	6
regulation of postsynaptic neurotransmitter receptor internalization	0.00194706	0.0214988	7
organic acid biosynthetic process	0.00195258	0.021519	46
regulation of synaptic vesicle cycle	0.00199225	0.0218492	23
body fluid secretion	0.00199753	0.0218492	19
developmental maturation	0.00216285	0.023293	40
regulation of membrane lipid distribution	0.00217348	0.023293	11
regulation of body fluid levels	0.00223142	0.0237828	44
chromatin remodeling	0.00232064	0.0245987	22
stem cell proliferation	0.00232064	0.0245987	22
organelle localization by membrane tethering	0.00234422	0.0247587	14
response to toxic substance	0.00236027	0.0248832	44
positive regulation of cyclase activity	0.00245023	0.0252169	6
regulation of postsynaptic specialization assembly	0.00245023	0.0252169	6
regulation of postsynapse assembly	0.00245023	0.0252169	6
endosomal transport	0.00245205	0.0252169	29
cellular component assembly involved in morphogenesis	0.00246142	0.0252198	19
regulation of muscle system process	0.00246903	0.0252534	33
cell cycle phase transition	0.00250856	0.0256128	49
tissue homeostasis	0.00269967	0.0270431	32
regulation of lipid metabolic process	0.00274444	0.0273974	43
regulation of skeletal muscle fiber development	0.00279878	0.0277971	5
regulation of modification of postsynaptic structure	0.00279878	0.0277971	5
actin filament-based movement	0.00284304	0.0279981	18
superoxide metabolic process	0.00297193	0.0290223	13
synaptic membrane adhesion	0.00299991	0.0291491	8
hormone biosynthetic process	0.00304491	0.0294881	14
maintenance of cell number	0.00314293	0.0302864	25
phospholipid translocation	0.00329882	0.031425	7
regulation of protein localization to synapse	0.00329882	0.031425	7
neural crest cell differentiation	0.00337807	0.032023	16
fibroblast proliferation	0.00349302	0.0326875	18
intraspecies interaction between organisms	0.00352975	0.0329255	11
coronary vasculature morphogenesis	0.00371474	0.0342132	8
vasculogenesis	0.00377419	0.0344883	16
osteoblast differentiation	0.00384576	0.0350325	28
regulation of lipid localization	0.00394651	0.0356715	22
response to temperature stimulus	0.00398885	0.0359428	24
regulation of cardiac muscle contraction by calcium ion signaling	0.00405994	0.0359718	5
regulation of respiratory burst	0.00405994	0.0359718	5
prostate gland growth	0.00405994	0.0359718	5
carbohydrate biosynthetic process	0.00419691	0.036794	27
vesicle fusion	0.00420766	0.0368328	16
membrane assembly	0.00455437	0.0389325	8
coenzyme metabolic process	0.00460849	0.0392226	41
neurotransmitter metabolic process	0.00466493	0.0395317	22
stem cell population maintenance	0.00466515	0.0395317	24
positive regulation of T cell differentiation	0.00468101	0.0396085	16
positive regulation of cell cycle	0.00493739	0.0415224	43
myofibril assembly	0.00500425	0.0417379	13
response to starvation	0.00503758	0.041896	24
regulation of epithelial cell differentiation	0.00506295	0.042047	22
cellular amino acid metabolic process	0.00513844	0.0425527	34
response to light stimulus	0.00514831	0.0425565	37
organelle fusion	0.00531474	0.0435182	19
negative regulation of inflammatory response	0.00548867	0.0445048	22
receptor-mediated endocytosis	0.00550692	0.0445908	30
protein palmitoylation	0.00553228	0.044672	8
positive regulation of peptidyl-lysine acetylation	0.00553228	0.044672	8
nucleosome disassembly	0.00568003	0.0450539	5
serotonin metabolic process	0.00568003	0.0450539	5
postsynaptic actin cytoskeleton organization	0.00568003	0.0450539	5
postsynaptic cytoskeleton organization	0.00568003	0.0450539	5
cellular response to topologically incorrect protein	0.00575801	0.045466	16
positive regulation of chondrocyte differentiation	0.00577878	0.045466	6
regulation of platelet aggregation	0.00577878	0.045466	6
organophosphate catabolic process	0.00581742	0.0457083	28
cellular response to osmotic stress	0.00600577	0.0468967	10
organelle transport along microtubule	0.00623117	0.0483724	14
chloride transport	0.00636719	0.0492318	16
apical protein localization	0.0064912	0.0497943	4
glycolytic process through glucose-6-phosphate	0.0064912	0.0497943	4
regulation of neutrophil activation	0.0064912	0.0497943	4
