# Supplementary material for: Whole-genome epigenetic function annotation through sgRNA libraries synthesized by controlled template-dependent elongation
Source: Research Square preprint supplement (doi:10.21203/rs.3.rs-100657/v1), 2020-11-05
Supplement: Supplementary file 9 [file TableS8.xlsx]

## Sheet: Mouse cell lines and tissues
Mouse cell lines and tissues
bone_marrow
C2C12
cerebellum
CH12.LX
cortical_plate
E14TG2a.4
ES-Bruce4
heart
intestine
kidney
liver
lung
MEL
olfactory_bulb
testis
thymus

## Sheet: Identify peaks
Chr	Start	End	Frequency shared in cell lines	Specific/Common
chr10	100428473	100428717	0	cell-type specific
chr10	100721857	100721998	0	cell-type specific
chr10	100874713	100874873	0	cell-type specific
chr10	101368075	101368214	0	cell-type specific
chr10	101404979	101405132	0	cell-type specific
chr10	101500007	101500169	0	cell-type specific
chr10	101551273	101551459	0	cell-type specific
chr10	101653731	101653881	0	cell-type specific
chr10	101708648	101708822	0	cell-type specific
chr10	10186427	10186662	0	cell-type specific
chr10	101911834	101912051	0	cell-type specific
chr10	102158237	102158380	0	cell-type specific
chr10	102390269	102390409	0	cell-type specific
chr10	102921528	102921730	0	cell-type specific
chr10	103384499	103384776	0	cell-type specific
chr10	104063663	104063819	0	cell-type specific
chr10	104171703	104171875	0	cell-type specific
chr10	104466483	104466635	0	cell-type specific
chr10	104641050	104641264	0	cell-type specific
chr10	104693607	104693767	0	cell-type specific
chr10	105010747	105010883	0	cell-type specific
chr10	105227763	105227940	0	cell-type specific
chr10	105269361	105269502	0	cell-type specific
chr10	105981530	105981695	0	cell-type specific
chr10	106248640	106248776	0	cell-type specific
chr10	106458931	106459144	0	cell-type specific
chr10	10668014	10668153	0	cell-type specific
chr10	106710496	106710657	0	cell-type specific
chr10	106942065	106942250	0	cell-type specific
chr10	107026844	107027015	0	cell-type specific
chr10	107184133	107184281	0	cell-type specific
chr10	107209468	107209738	0	cell-type specific
chr10	107290328	107290495	0	cell-type specific
chr10	107413209	107413353	0	cell-type specific
chr10	107751504	107751768	0	cell-type specific
chr10	107873051	107873277	0	cell-type specific
chr10	108743938	108744098	0	cell-type specific
chr10	109276575	109276743	0	cell-type specific
chr10	109323517	109323681	0	cell-type specific
chr10	109416983	109417208	0	cell-type specific
chr10	109788083	109788236	0	cell-type specific
chr10	109800032	109800262	0	cell-type specific
chr10	109832053	109832237	0	cell-type specific
chr10	109838251	109838406	0	cell-type specific
chr10	109879898	109880088	0	cell-type specific
chr10	109968970	109969101	0	cell-type specific
chr10	110234637	110234762	0	cell-type specific
chr10	110264886	110265322	0	cell-type specific
chr10	110278927	110279149	0	cell-type specific
chr10	110291064	110291244	0	cell-type specific
chr10	110348527	110348696	0	cell-type specific
chr10	110353100	110353244	0	cell-type specific
chr10	110372877	110373015	0	cell-type specific
chr10	110575827	110576051	0	cell-type specific
chr10	11072661	11072802	0	cell-type specific
chr10	110835216	110835352	0	cell-type specific
chr10	110845979	110846177	0	cell-type specific
chr10	111098096	111098244	0	cell-type specific
chr10	111141770	111142190	0	cell-type specific
chr10	111351309	111351439	0	cell-type specific
chr10	111382263	111382462	0	cell-type specific
chr10	111634628	111634813	0	cell-type specific
chr10	112208732	112208930	0	cell-type specific
chr10	112289138	112289354	0	cell-type specific
chr10	113130178	113130467	0	cell-type specific
chr10	113275545	113275696	0	cell-type specific
chr10	113296188	113296387	0	cell-type specific
chr10	113327064	113327221	0	cell-type specific
chr10	113486477	113486646	0	cell-type specific
chr10	113569131	113569357	0	cell-type specific
chr10	113602369	113602521	0	cell-type specific
chr10	113730312	113730459	0	cell-type specific
chr10	113986381	113986540	0	cell-type specific
chr10	114127020	114127179	0	cell-type specific
chr10	114716135	114716277	0	cell-type specific
chr10	114763035	114763195	0	cell-type specific
chr10	114775732	114776011	0	cell-type specific
chr10	114800178	114800403	0	cell-type specific
chr10	114933628	114933778	0	cell-type specific
chr10	114995073	114995202	0	cell-type specific
chr10	115027382	115027510	0	cell-type specific
chr10	115039221	115039488	0	cell-type specific
chr10	115046972	115047192	0	cell-type specific
chr10	115047300	115047468	0	cell-type specific
chr10	115170071	115170215	0	cell-type specific
chr10	115276858	115277029	0	cell-type specific
chr10	115312510	115312800	0	cell-type specific
chr10	115631144	115631271	0	cell-type specific
chr10	115669416	115669563	0	cell-type specific
chr10	115676879	115677073	0	cell-type specific
chr10	115767165	115767443	0	cell-type specific
chr10	115948189	115948332	0	cell-type specific
chr10	115957284	115957413	0	cell-type specific
chr10	115962163	115962336	0	cell-type specific
chr10	116184945	116185096	0	cell-type specific
chr10	116242363	116242526	0	cell-type specific
chr10	116270904	116271137	0	cell-type specific
chr10	116410491	116410654	0	cell-type specific
chr10	116873358	116873522	0	cell-type specific
chr10	117010691	117010837	0	cell-type specific
chr10	117018278	117018432	0	cell-type specific
chr10	117125782	117125938	0	cell-type specific
chr10	117140249	117140444	0	cell-type specific
chr10	117385473	117385609	0	cell-type specific
chr10	117385859	117386078	0	cell-type specific
chr10	11743009	11743217	0	cell-type specific
chr10	117438059	117438226	0	cell-type specific
chr10	117518937	117519107	0	cell-type specific
chr10	117843210	117843477	0	cell-type specific
chr10	117890962	117891267	0	cell-type specific
chr10	117922862	117923028	0	cell-type specific
chr10	117924297	117924438	0	cell-type specific
chr10	118152429	118152556	0	cell-type specific
chr10	118162585	118162753	0	cell-type specific
chr10	118247530	118247697	0	cell-type specific
chr10	118794067	118794222	0	cell-type specific
chr10	118898860	118899027	0	cell-type specific
chr10	11895565	11895815	0	cell-type specific
chr10	118970060	118970187	0	cell-type specific
chr10	119515965	119516166	0	cell-type specific
chr10	119664650	119664780	0	cell-type specific
chr10	119689083	119689212	0	cell-type specific
chr10	119689580	119689752	0	cell-type specific
chr10	119724117	119724243	0	cell-type specific
chr10	119795015	119795253	0	cell-type specific
chr10	11985026	11985170	0	cell-type specific
chr10	119883991	119884182	0	cell-type specific
chr10	120155233	120155370	0	cell-type specific
chr10	120378110	120378299	0	cell-type specific
chr10	120530013	120530307	0	cell-type specific
chr10	120572423	120572603	0	cell-type specific
chr10	120610272	120610448	0	cell-type specific
chr10	120612893	120613037	0	cell-type specific
chr10	120645407	120645731	0	cell-type specific
chr10	120692476	120692624	0	cell-type specific
chr10	120729418	120729558	0	cell-type specific
chr10	120930784	120930945	0	cell-type specific
chr10	121142917	121143083	0	cell-type specific
chr10	121286136	121286340	0	cell-type specific
chr10	122017785	122017950	0	cell-type specific
chr10	122038636	122038903	0	cell-type specific
chr10	122188801	122188990	0	cell-type specific
chr10	122656482	122656617	0	cell-type specific
chr10	122707377	122707505	0	cell-type specific
chr10	122720927	122721145	0	cell-type specific
chr10	122762584	122762727	0	cell-type specific
chr10	122773082	122773426	0	cell-type specific
chr10	122783750	122783875	0	cell-type specific
chr10	122856151	122856279	0	cell-type specific
chr10	122909757	122909939	0	cell-type specific
chr10	122916555	122916683	0	cell-type specific
chr10	122935943	122936120	0	cell-type specific
chr10	123001855	123001995	0	cell-type specific
chr10	123336295	123336508	0	cell-type specific
chr10	123755344	123755491	0	cell-type specific
chr10	123778733	123778979	0	cell-type specific
chr10	12425094	12425340	0	cell-type specific
chr10	124321946	124322159	0	cell-type specific
chr10	124454556	124454716	0	cell-type specific
chr10	124554997	124555149	0	cell-type specific
chr10	124635495	124635688	0	cell-type specific
chr10	124733605	124733764	0	cell-type specific
chr10	124761979	124762151	0	cell-type specific
chr10	124866130	124866300	0	cell-type specific
chr10	125012697	125012949	0	cell-type specific
chr10	125027056	125027216	0	cell-type specific
chr10	125182631	125182771	0	cell-type specific
chr10	125244652	125244835	0	cell-type specific
chr10	12549829	12550106	0	cell-type specific
chr10	125769153	125769278	0	cell-type specific
chr10	125905874	125906058	0	cell-type specific
chr10	125929224	125929428	0	cell-type specific
chr10	126336593	126336746	0	cell-type specific
chr10	126348957	126349117	0	cell-type specific
chr10	126359196	126359510	0	cell-type specific
chr10	126439411	126439626	0	cell-type specific
chr10	126573075	126573215	0	cell-type specific
chr10	126712178	126712365	0	cell-type specific
chr10	126747361	126747499	0	cell-type specific
chr10	126756956	126757233	0	cell-type specific
chr10	126846443	126846582	0	cell-type specific
chr10	126919978	126920242	0	cell-type specific
chr10	126930287	126930498	0	cell-type specific
chr10	126949599	126949746	0	cell-type specific
chr10	126972685	126972827	0	cell-type specific
chr10	127245689	127245829	0	cell-type specific
chr10	127361453	127361596	0	cell-type specific
chr10	127455378	127455525	0	cell-type specific
chr10	127527723	127527962	0	cell-type specific
chr10	127528423	127528611	0	cell-type specific
chr10	127610300	127610529	0	cell-type specific
chr10	127656549	127656682	0	cell-type specific
chr10	127709378	127709509	0	cell-type specific
chr10	127777098	127777244	0	cell-type specific
chr10	127780761	127781129	0	cell-type specific
chr10	127786062	127786245	0	cell-type specific
chr10	128282389	128282534	0	cell-type specific
chr10	128476625	128476800	0	cell-type specific
chr10	128577450	128577638	0	cell-type specific
chr10	128870761	128871164	0	cell-type specific
chr10	128905942	128906091	0	cell-type specific
chr10	129151138	129151274	0	cell-type specific
chr10	129234835	129234977	0	cell-type specific
chr10	129304319	129304486	0	cell-type specific
chr10	129423967	129424158	0	cell-type specific
chr10	129425277	129425465	0	cell-type specific
chr10	13006008	13006257	0	cell-type specific
chr10	13110563	13110693	0	cell-type specific
chr10	13488888	13489101	0	cell-type specific
chr10	13799542	13799703	0	cell-type specific
chr10	14030631	14030847	0	cell-type specific
chr10	14755037	14755186	0	cell-type specific
chr10	14819270	14819492	0	cell-type specific
chr10	15454196	15454326	0	cell-type specific
chr10	15708210	15708385	0	cell-type specific
chr10	15820468	15820600	0	cell-type specific
chr10	15962841	15962982	0	cell-type specific
chr10	16483114	16483297	0	cell-type specific
chr10	16781987	16782123	0	cell-type specific
chr10	17292685	17292965	0	cell-type specific
chr10	17347627	17347771	0	cell-type specific
chr10	17490310	17490547	0	cell-type specific
chr10	17779306	17779480	0	cell-type specific
chr10	17929908	17930230	0	cell-type specific
chr10	18052143	18052433	0	cell-type specific
chr10	18103110	18103245	0	cell-type specific
chr10	18139741	18139885	0	cell-type specific
chr10	18454588	18454737	0	cell-type specific
chr10	18459758	18459925	0	cell-type specific
chr10	18673245	18673440	0	cell-type specific
chr10	18702139	18702265	0	cell-type specific
chr10	19145451	19145687	0	cell-type specific
chr10	19227026	19227161	0	cell-type specific
chr10	19687924	19688072	0	cell-type specific
chr10	19858660	19858885	0	cell-type specific
chr10	20051851	20052003	0	cell-type specific
chr10	20087085	20087210	0	cell-type specific
chr10	20134344	20134491	0	cell-type specific
chr10	20144169	20144318	0	cell-type specific
chr10	20206883	20207019	0	cell-type specific
chr10	20353916	20354214	0	cell-type specific
chr10	20583434	20583648	0	cell-type specific
chr10	21042982	21043135	0	cell-type specific
chr10	21369749	21369971	0	cell-type specific
chr10	21417619	21417788	0	cell-type specific
chr10	21535386	21535634	0	cell-type specific
chr10	21640791	21640959	0	cell-type specific
chr10	21704670	21704838	0	cell-type specific
chr10	21724719	21724863	0	cell-type specific
chr10	21791155	21791311	0	cell-type specific
chr10	21840419	21840577	0	cell-type specific
chr10	21862720	21862853	0	cell-type specific
chr10	22183033	22183193	0	cell-type specific
chr10	22572425	22572611	0	cell-type specific
chr10	22840959	22841136	0	cell-type specific
chr10	22907309	22907475	0	cell-type specific
chr10	23047970	23048220	0	cell-type specific
chr10	23085357	23085504	0	cell-type specific
chr10	23102782	23102910	0	cell-type specific
chr10	23174568	23174731	0	cell-type specific
chr10	23483725	23484148	0	cell-type specific
chr10	23631035	23631272	0	cell-type specific
chr10	23956817	23956987	0	cell-type specific
chr10	24029325	24029479	0	cell-type specific
chr10	24223751	24224047	0	cell-type specific
chr10	24268331	24268536	0	cell-type specific
chr10	24292706	24292862	0	cell-type specific
chr10	24332172	24332312	0	cell-type specific
chr10	24382348	24382528	0	cell-type specific
chr10	24451363	24451519	0	cell-type specific
chr10	24486584	24486787	0	cell-type specific
chr10	24585322	24585494	0	cell-type specific
chr10	25007434	25007589	0	cell-type specific
chr10	25014982	25015112	0	cell-type specific
chr10	25054216	25054411	0	cell-type specific
chr10	25186847	25187065	0	cell-type specific
chr10	25376273	25376427	0	cell-type specific
chr10	25871227	25871369	0	cell-type specific
chr10	26244376	26244555	0	cell-type specific
chr10	26427866	26428015	0	cell-type specific
chr10	26550797	26550947	0	cell-type specific
chr10	26618286	26618545	0	cell-type specific
chr10	26642166	26642318	0	cell-type specific
chr10	27357538	27357907	0	cell-type specific
chr10	27799115	27799452	0	cell-type specific
chr10	27821279	27821442	0	cell-type specific
chr10	27933591	27933741	0	cell-type specific
chr10	27967701	27967871	0	cell-type specific
chr10	28015897	28016037	0	cell-type specific
chr10	28091694	28091888	0	cell-type specific
chr10	28981010	28981160	0	cell-type specific
chr10	29147733	29147954	0	cell-type specific
chr10	29331488	29331649	0	cell-type specific
chr10	29465449	29465611	0	cell-type specific
chr10	29467750	29467876	0	cell-type specific
chr10	29661989	29662132	0	cell-type specific
chr10	30039403	30039682	0	cell-type specific
chr10	30179709	30179921	0	cell-type specific
chr10	30302148	30302334	0	cell-type specific
chr10	30452511	30452680	0	cell-type specific
chr10	30485747	30485961	0	cell-type specific
chr10	31324823	31325024	0	cell-type specific
chr10	31540139	31540283	0	cell-type specific
chr10	31582268	31582393	0	cell-type specific
chr10	32028616	32028871	0	cell-type specific
chr10	32033653	32033841	0	cell-type specific
chr10	32043025	32043167	0	cell-type specific
chr10	32079416	32079608	0	cell-type specific
chr10	3226951	3227099	0	cell-type specific
chr10	32334523	32334680	0	cell-type specific
chr10	32447516	32447756	0	cell-type specific
chr10	32548129	32548306	0	cell-type specific
chr10	32613146	32613309	0	cell-type specific
chr10	32821878	32822118	0	cell-type specific
chr10	33047558	33047733	0	cell-type specific
chr10	3306367	3306653	0	cell-type specific
chr10	33090427	33090805	0	cell-type specific
chr10	33698034	33698283	0	cell-type specific
chr10	33729611	33729815	0	cell-type specific
chr10	33771175	33771369	0	cell-type specific
chr10	33841008	33841346	0	cell-type specific
chr10	33949456	33949626	0	cell-type specific
chr10	33996665	33996814	0	cell-type specific
chr10	34056853	34056976	0	cell-type specific
chr10	34313492	34313678	0	cell-type specific
chr10	34438261	34438484	0	cell-type specific
chr10	3450770	3450941	0	cell-type specific
chr10	34682309	34682544	0	cell-type specific
chr10	34786924	34787174	0	cell-type specific
chr10	34855743	34855897	0	cell-type specific
chr10	35378422	35378563	0	cell-type specific
chr10	35818947	35819209	0	cell-type specific
chr10	35934679	35934823	0	cell-type specific
chr10	36644480	36644657	0	cell-type specific
chr10	3680792	3680970	0	cell-type specific
chr10	37062787	37063003	0	cell-type specific
chr10	37281273	37281445	0	cell-type specific
chr10	37430681	37430906	0	cell-type specific
chr10	38166257	38166384	0	cell-type specific
chr10	38399475	38399696	0	cell-type specific
chr10	38550113	38550275	0	cell-type specific
chr10	38587444	38587680	0	cell-type specific
chr10	38686651	38687110	0	cell-type specific
chr10	38772380	38772592	0	cell-type specific
chr10	38810853	38811081	0	cell-type specific
chr10	39040020	39040190	0	cell-type specific
chr10	39057487	39057708	0	cell-type specific
chr10	39091567	39091704	0	cell-type specific
chr10	39377826	39378049	0	cell-type specific
chr10	39687776	39688017	0	cell-type specific
chr10	39807090	39807240	0	cell-type specific
chr10	4007907	4008237	0	cell-type specific
chr10	40170000	40170311	0	cell-type specific
chr10	40370075	40370294	0	cell-type specific
chr10	40384965	40385110	0	cell-type specific
chr10	40460884	40461121	0	cell-type specific
chr10	40502148	40502308	0	cell-type specific
chr10	40631250	40631399	0	cell-type specific
chr10	40643457	40643619	0	cell-type specific
chr10	41077259	41077395	0	cell-type specific
chr10	41095005	41095152	0	cell-type specific
chr10	41268901	41269165	0	cell-type specific
chr10	41288394	41288531	0	cell-type specific
chr10	41455782	41455945	0	cell-type specific
chr10	41825134	41825341	0	cell-type specific
chr10	4215377	4215547	0	cell-type specific
chr10	42371843	42371993	0	cell-type specific
chr10	4252780	4252919	0	cell-type specific
chr10	42584829	42584975	0	cell-type specific
chr10	42664139	42664373	0	cell-type specific
chr10	42836915	42837112	0	cell-type specific
chr10	42855224	42855354	0	cell-type specific
chr10	42892743	42892905	0	cell-type specific
chr10	43117592	43117742	0	cell-type specific
chr10	43134881	43135059	0	cell-type specific
chr10	43136390	43136607	0	cell-type specific
chr10	43261216	43261395	0	cell-type specific
chr10	43369345	43369622	0	cell-type specific
chr10	43567390	43567610	0	cell-type specific
chr10	43737043	43737204	0	cell-type specific
chr10	43880482	43880651	0	cell-type specific
chr10	43939392	43939562	0	cell-type specific
chr10	44046998	44047134	0	cell-type specific
chr10	44076624	44076824	0	cell-type specific
chr10	44230792	44230962	0	cell-type specific
chr10	44248010	44248200	0	cell-type specific
chr10	44560016	44560184	0	cell-type specific
chr10	44615141	44615284	0	cell-type specific
chr10	44617767	44617933	0	cell-type specific
chr10	44621693	44621876	0	cell-type specific
chr10	44688378	44688518	0	cell-type specific
chr10	44832575	44832783	0	cell-type specific
chr10	44837159	44837287	0	cell-type specific
chr10	44860177	44860454	0	cell-type specific
chr10	44941504	44941673	0	cell-type specific
chr10	45470322	45470550	0	cell-type specific
chr10	45493817	45493979	0	cell-type specific
chr10	4569702	4569888	0	cell-type specific
chr10	45818682	45818808	0	cell-type specific
chr10	46358021	46358180	0	cell-type specific
chr10	46370039	46370286	0	cell-type specific
chr10	4650655	4650920	0	cell-type specific
chr10	47190781	47190935	0	cell-type specific
chr10	4743198	4743386	0	cell-type specific
chr10	47569162	47569303	0	cell-type specific
chr10	48455236	48455493	0	cell-type specific
chr10	49058048	49058324	0	cell-type specific
chr10	4908524	4908689	0	cell-type specific
chr10	49586644	49586843	0	cell-type specific
chr10	50293415	50293570	0	cell-type specific
chr10	50749683	50749865	0	cell-type specific
chr10	51143923	51144059	0	cell-type specific
chr10	51274034	51274399	0	cell-type specific
chr10	51985368	51985645	0	cell-type specific
chr10	52107155	52107311	0	cell-type specific
chr10	52195426	52195631	0	cell-type specific
chr10	52649406	52649601	0	cell-type specific
chr10	52729085	52729234	0	cell-type specific
chr10	52944620	52944763	0	cell-type specific
chr10	53104550	53104710	0	cell-type specific
chr10	53228443	53228625	0	cell-type specific
chr10	53242074	53242224	0	cell-type specific
chr10	53358507	53358646	0	cell-type specific
chr10	53410411	53410581	0	cell-type specific
chr10	53506682	53506874	0	cell-type specific
chr10	53534885	53535055	0	cell-type specific
chr10	53696203	53696333	0	cell-type specific
chr10	53802774	53802914	0	cell-type specific
chr10	53841594	53841738	0	cell-type specific
chr10	53974391	53974540	0	cell-type specific
chr10	54446885	54447044	0	cell-type specific
chr10	5461216	5461388	0	cell-type specific
chr10	54997800	54997949	0	cell-type specific
chr10	55119330	55119488	0	cell-type specific
chr10	55281251	55281595	0	cell-type specific
chr10	55914998	55915182	0	cell-type specific
chr10	55978298	55978518	0	cell-type specific
chr10	5631845	5632064	0	cell-type specific
chr10	5723932	5724075	0	cell-type specific
chr10	57449048	57449217	0	cell-type specific
chr10	57549983	57550177	0	cell-type specific
chr10	57877357	57877625	0	cell-type specific
chr10	57970751	57970879	0	cell-type specific
chr10	57980939	57981121	0	cell-type specific
chr10	58210199	58210383	0	cell-type specific
chr10	58272048	58272200	0	cell-type specific
chr10	58513591	58513733	0	cell-type specific
chr10	58945931	58946230	0	cell-type specific
chr10	59072095	59072256	0	cell-type specific
chr10	59299455	59299627	0	cell-type specific
chr10	59356109	59356242	0	cell-type specific
chr10	59799133	59799320	0	cell-type specific
chr10	59808970	59809098	0	cell-type specific
chr10	60074203	60074333	0	cell-type specific
chr10	60203109	60203339	0	cell-type specific
chr10	60770149	60770384	0	cell-type specific
chr10	60807398	60807603	0	cell-type specific
chr10	61132672	61132844	0	cell-type specific
chr10	61278569	61278841	0	cell-type specific
chr10	61375535	61375736	0	cell-type specific
chr10	61500396	61500523	0	cell-type specific
chr10	61565831	61566073	0	cell-type specific
chr10	61953099	61953233	0	cell-type specific
chr10	62243276	62243457	0	cell-type specific
chr10	6224365	6224500	0	cell-type specific
chr10	62465354	62465600	0	cell-type specific
chr10	62537459	62537660	0	cell-type specific
chr10	62713242	62713421	0	cell-type specific
chr10	62849089	62849236	0	cell-type specific
chr10	6298264	6298583	0	cell-type specific
chr10	6326471	6326612	0	cell-type specific
chr10	63447127	63447296	0	cell-type specific
chr10	63484146	63484301	0	cell-type specific
chr10	64105900	64106108	0	cell-type specific
chr10	64317736	64317895	0	cell-type specific
chr10	64495343	64495469	0	cell-type specific
chr10	64572932	64573082	0	cell-type specific
chr10	64715079	64715233	0	cell-type specific
chr10	64759761	64759950	0	cell-type specific
chr10	64787482	64787676	0	cell-type specific
chr10	64795464	64795612	0	cell-type specific
chr10	64888563	64888731	0	cell-type specific
chr10	65784009	65784192	0	cell-type specific
chr10	65789643	65789806	0	cell-type specific
chr10	65924859	65924997	0	cell-type specific
chr10	65974589	65974783	0	cell-type specific
chr10	66082283	66082426	0	cell-type specific
chr10	66097182	66097331	0	cell-type specific
chr10	66302422	66302562	0	cell-type specific
chr10	66496485	66496698	0	cell-type specific
chr10	66735140	66735287	0	cell-type specific
chr10	66744811	66744978	0	cell-type specific
chr10	66788473	66788680	0	cell-type specific
chr10	66874849	66875007	0	cell-type specific
chr10	66922970	66923168	0	cell-type specific
chr10	66947674	66947860	0	cell-type specific
chr10	67019489	67019619	0	cell-type specific
chr10	6708449	6708611	0	cell-type specific
chr10	67257362	67257527	0	cell-type specific
chr10	6726212	6726385	0	cell-type specific
chr10	67363050	67363257	0	cell-type specific
chr10	67380336	67380540	0	cell-type specific
chr10	67405586	67405769	0	cell-type specific
chr10	67419689	67419913	0	cell-type specific
chr10	67469528	67469776	0	cell-type specific
chr10	67747122	67747334	0	cell-type specific
chr10	67877128	67877268	0	cell-type specific
chr10	68158156	68158330	0	cell-type specific
chr10	68220189	68220434	0	cell-type specific
chr10	68310390	68310570	0	cell-type specific
chr10	68394946	68395160	0	cell-type specific
chr10	68567805	68567982	0	cell-type specific
chr10	68681401	68681578	0	cell-type specific
chr10	68788866	68789006	0	cell-type specific
chr10	68789769	68789915	0	cell-type specific
chr10	68826352	68826538	0	cell-type specific
chr10	68936683	68936846	0	cell-type specific
chr10	6894212	6894377	0	cell-type specific
chr10	68971497	68971627	0	cell-type specific
chr10	69032509	69032662	0	cell-type specific
chr10	69175693	69175861	0	cell-type specific
chr10	69251584	69251741	0	cell-type specific
chr10	69307912	69308056	0	cell-type specific
chr10	69359657	69359844	0	cell-type specific
chr10	69440084	69440277	0	cell-type specific
chr10	69768079	69768271	0	cell-type specific
chr10	69941083	69941232	0	cell-type specific
chr10	6997541	6997685	0	cell-type specific
chr10	69989371	69989624	0	cell-type specific
chr10	70296098	70296312	0	cell-type specific
chr10	70354612	70354799	0	cell-type specific
chr10	70674861	70675032	0	cell-type specific
chr10	70866935	70867170	0	cell-type specific
chr10	70897061	70897257	0	cell-type specific
chr10	71390548	71390697	0	cell-type specific
chr10	71522780	71522923	0	cell-type specific
chr10	71569670	71569824	0	cell-type specific
chr10	71881277	71881485	0	cell-type specific
chr10	71929890	71930068	0	cell-type specific
chr10	72012134	72012269	0	cell-type specific
chr10	72164435	72164675	0	cell-type specific
chr10	72259715	72259846	0	cell-type specific
chr10	72350982	72351146	0	cell-type specific
chr10	72433715	72433879	0	cell-type specific
chr10	7243930	7244128	0	cell-type specific
chr10	72550622	72550792	0	cell-type specific
chr10	72777854	72777998	0	cell-type specific
chr10	73194145	73194407	0	cell-type specific
chr10	73935890	73936091	0	cell-type specific
chr10	74064473	74064666	0	cell-type specific
chr10	74157295	74157460	0	cell-type specific
chr10	74229409	74229637	0	cell-type specific
chr10	74332256	74332459	0	cell-type specific
chr10	74546159	74546302	0	cell-type specific
chr10	74548620	74548780	0	cell-type specific
chr10	74564739	74564872	0	cell-type specific
chr10	74599051	74599227	0	cell-type specific
chr10	74625393	74625532	0	cell-type specific
chr10	74651121	74651341	0	cell-type specific
chr10	74817066	74817261	0	cell-type specific
chr10	74950064	74950281	0	cell-type specific
chr10	74991844	74991984	0	cell-type specific
chr10	74997709	74997882	0	cell-type specific
chr10	75002204	75002438	0	cell-type specific
chr10	75058560	75058855	0	cell-type specific
chr10	75255499	75255786	0	cell-type specific
chr10	75291936	75292118	0	cell-type specific
chr10	75472427	75472598	0	cell-type specific
chr10	75500414	75500826	0	cell-type specific
chr10	75832934	75833143	0	cell-type specific
chr10	75902374	75902562	0	cell-type specific
chr10	76025890	76026037	0	cell-type specific
chr10	76080408	76080554	0	cell-type specific
chr10	76259804	76259948	0	cell-type specific
chr10	76284475	76284627	0	cell-type specific
chr10	76311975	76312123	0	cell-type specific
chr10	76361704	76362059	0	cell-type specific
chr10	76550929	76551095	0	cell-type specific
chr10	76849520	76849694	0	cell-type specific
chr10	76910001	76910140	0	cell-type specific
chr10	77010810	77010933	0	cell-type specific
chr10	77034370	77034595	0	cell-type specific
chr10	77466531	77466670	0	cell-type specific
chr10	78072307	78072598	0	cell-type specific
chr10	78385094	78385390	0	cell-type specific
chr10	78638224	78638394	0	cell-type specific
chr10	78786149	78786355	0	cell-type specific
chr10	78824638	78824939	0	cell-type specific
chr10	78867647	78867816	0	cell-type specific
chr10	78920854	78921088	0	cell-type specific
chr10	78922624	78922913	0	cell-type specific
chr10	78929716	78930036	0	cell-type specific
chr10	79062380	79062636	0	cell-type specific
chr10	79205137	79205334	0	cell-type specific
chr10	79262310	79262432	0	cell-type specific
chr10	79324743	79324943	0	cell-type specific
chr10	79693739	79693947	0	cell-type specific
chr10	79797596	79797729	0	cell-type specific
chr10	79797917	79798054	0	cell-type specific
chr10	79819819	79820055	0	cell-type specific
chr10	79824948	79825235	0	cell-type specific
chr10	79825537	79825702	0	cell-type specific
chr10	79947623	79947779	0	cell-type specific
chr10	80390340	80390464	0	cell-type specific
chr10	80503703	80503833	0	cell-type specific
chr10	80661502	80661655	0	cell-type specific
chr10	80685272	80685399	0	cell-type specific
chr10	80703273	80703602	0	cell-type specific
chr10	80838981	80839161	0	cell-type specific
chr10	80912615	80912814	0	cell-type specific
chr10	81103959	81104110	0	cell-type specific
chr10	81652130	81652414	0	cell-type specific
chr10	81739027	81739240	0	cell-type specific
chr10	81835995	81836122	0	cell-type specific
chr10	82218094	82218281	0	cell-type specific
chr10	82302694	82302968	0	cell-type specific
chr10	82550137	82550391	0	cell-type specific
chr10	8255500	8255695	0	cell-type specific
chr10	82678909	82679050	0	cell-type specific
chr10	82815097	82815371	0	cell-type specific
chr10	83001159	83001288	0	cell-type specific
chr10	83348113	83348358	0	cell-type specific
chr10	83515908	83516030	0	cell-type specific
chr10	8354627	8354823	0	cell-type specific
chr10	83771197	83771333	0	cell-type specific
chr10	84089974	84090116	0	cell-type specific
chr10	84230725	84230965	0	cell-type specific
chr10	84265624	84265772	0	cell-type specific
chr10	84296896	84297041	0	cell-type specific
chr10	84331650	84331837	0	cell-type specific
chr10	84405751	84405889	0	cell-type specific
chr10	84478361	84478485	0	cell-type specific
chr10	84498546	84498682	0	cell-type specific
chr10	84825549	84825711	0	cell-type specific
chr10	84857627	84857859	0	cell-type specific
chr10	84950016	84950160	0	cell-type specific
chr10	84954482	84954719	0	cell-type specific
chr10	85239457	85239634	0	cell-type specific
chr10	85648811	85649023	0	cell-type specific
chr10	85799075	85799250	0	cell-type specific
chr10	86022546	86022684	0	cell-type specific
chr10	86181556	86181754	0	cell-type specific
chr10	86240535	86240780	0	cell-type specific
chr10	86288179	86288324	0	cell-type specific
chr10	86462224	86462423	0	cell-type specific
chr10	8654566	8654718	0	cell-type specific
chr10	86755945	86756098	0	cell-type specific
chr10	86759486	86759629	0	cell-type specific
chr10	86769573	86769878	0	cell-type specific
chr10	87047775	87047930	0	cell-type specific
chr10	87122650	87122818	0	cell-type specific
chr10	87276919	87277096	0	cell-type specific
chr10	87499215	87499348	0	cell-type specific
chr10	87549055	87549190	0	cell-type specific
chr10	87770084	87770265	0	cell-type specific
chr10	87773312	87773509	0	cell-type specific
chr10	87799771	87799926	0	cell-type specific
chr10	87813776	87814044	0	cell-type specific
chr10	87978676	87978912	0	cell-type specific
chr10	87992140	87992292	0	cell-type specific
chr10	88236835	88237005	0	cell-type specific
chr10	88270752	88270918	0	cell-type specific
chr10	88470118	88470263	0	cell-type specific
chr10	8852946	8853116	0	cell-type specific
chr10	88558507	88558793	0	cell-type specific
chr10	88727383	88727533	0	cell-type specific
chr10	88899918	88900057	0	cell-type specific
chr10	89541320	89541453	0	cell-type specific
chr10	89572096	89572294	0	cell-type specific
chr10	89641647	89641817	0	cell-type specific
chr10	89673149	89673292	0	cell-type specific
chr10	89735984	89736237	0	cell-type specific
chr10	90060578	90060724	0	cell-type specific
chr10	90071681	90071817	0	cell-type specific
chr10	90141855	90141989	0	cell-type specific
chr10	90178291	90178439	0	cell-type specific
chr10	90196147	90196328	0	cell-type specific
chr10	90436377	90436562	0	cell-type specific
chr10	90460887	90461183	0	cell-type specific
chr10	90495522	90495662	0	cell-type specific
chr10	90509445	90509631	0	cell-type specific
chr10	90570918	90571096	0	cell-type specific
chr10	9076951	9077088	0	cell-type specific
chr10	90921961	90922108	0	cell-type specific
chr10	91001759	91001903	0	cell-type specific
chr10	91006659	91007046	0	cell-type specific
chr10	91017708	91017840	0	cell-type specific
chr10	91036291	91036528	0	cell-type specific
chr10	91226270	91226420	0	cell-type specific
chr10	91308887	91309094	0	cell-type specific
chr10	9159732	9159929	0	cell-type specific
chr10	9168064	9168319	0	cell-type specific
chr10	9197414	9197607	0	cell-type specific
chr10	92079080	92079242	0	cell-type specific
chr10	92261165	92261303	0	cell-type specific
chr10	92319751	92319882	0	cell-type specific
chr10	92477720	92477984	0	cell-type specific
chr10	92491820	92491951	0	cell-type specific
chr10	92722842	92722997	0	cell-type specific
chr10	92768767	92769005	0	cell-type specific
chr10	92812952	92813184	0	cell-type specific
chr10	93021691	93021879	0	cell-type specific
chr10	93055825	93056125	0	cell-type specific
chr10	93240540	93240766	0	cell-type specific
chr10	93292718	93292871	0	cell-type specific
chr10	9355707	9355926	0	cell-type specific
chr10	93757030	93757295	0	cell-type specific
chr10	94471793	94471967	0	cell-type specific
chr10	9458627	9458827	0	cell-type specific
chr10	94765626	94765868	0	cell-type specific
chr10	94835209	94835510	0	cell-type specific
chr10	94911675	94911849	0	cell-type specific
chr10	94934198	94934353	0	cell-type specific
chr10	94962622	94962773	0	cell-type specific
chr10	94968313	94968453	0	cell-type specific
chr10	95174747	95174887	0	cell-type specific
chr10	95443734	95443918	0	cell-type specific
chr10	95748135	95748274	0	cell-type specific
chr10	95808938	95809120	0	cell-type specific
chr10	95818327	95818489	0	cell-type specific
chr10	96114150	96114368	0	cell-type specific
chr10	96450408	96450572	0	cell-type specific
chr10	96730600	96730738	0	cell-type specific
chr10	96819020	96819158	0	cell-type specific
chr10	96937964	96938149	0	cell-type specific
chr10	97300292	97300430	0	cell-type specific
chr10	97423738	97423896	0	cell-type specific
chr10	97545848	97546027	0	cell-type specific
chr10	97933970	97934147	0	cell-type specific
chr10	98255504	98255694	0	cell-type specific
chr10	98577981	98578244	0	cell-type specific
chr10	98619919	98620141	0	cell-type specific
chr10	98630678	98630815	0	cell-type specific
chr10	98846974	98847188	0	cell-type specific
chr10	99046492	99046649	0	cell-type specific
chr10	9927951	9928133	0	cell-type specific
chr10	99488894	99489169	0	cell-type specific
chr10	99645949	99646121	0	cell-type specific
chr10	99931837	99932076	0	cell-type specific
chr10	99964546	99964674	0	cell-type specific
chr1	100155642	100155953	0	cell-type specific
chr1	100233031	100233189	0	cell-type specific
chr1	100280893	100281210	0	cell-type specific
chr1	10034256	10034437	0	cell-type specific
chr1	100629635	100629793	0	cell-type specific
chr1	10066311	10066493	0	cell-type specific
chr1	100726246	100726383	0	cell-type specific
chr1	100804348	100804531	0	cell-type specific
chr1	100924116	100924245	0	cell-type specific
chr1	10128943	10129082	0	cell-type specific
chr1	101315931	101316101	0	cell-type specific
chr1	10149661	10149811	0	cell-type specific
chr1	10165843	10166146	0	cell-type specific
chr1	101659396	101659605	0	cell-type specific
chr1	101674759	101674932	0	cell-type specific
chr1	101749644	101749813	0	cell-type specific
chr1	101963787	101964010	0	cell-type specific
chr1	102349244	102349419	0	cell-type specific
chr1	102685254	102685434	0	cell-type specific
chr1	103131496	103131805	0	cell-type specific
chr1	10323580	10323745	0	cell-type specific
chr1	103375133	103375285	0	cell-type specific
chr1	103530981	103531146	0	cell-type specific
chr1	103579629	103579805	0	cell-type specific
chr1	10360300	10360477	0	cell-type specific
chr1	104110421	104110600	0	cell-type specific
chr1	10484420	10484587	0	cell-type specific
chr1	104879568	104879735	0	cell-type specific
chr1	105124588	105124775	0	cell-type specific
chr1	10536373	10536607	0	cell-type specific
chr1	105718319	105718473	0	cell-type specific
chr1	105796883	105797145	0	cell-type specific
chr1	105861343	105861578	0	cell-type specific
chr1	105939059	105939187	0	cell-type specific
chr1	106065642	106065827	0	cell-type specific
chr1	106396829	106397069	0	cell-type specific
chr1	106473901	106474047	0	cell-type specific
chr1	106571366	106571625	0	cell-type specific
chr1	106605187	106605380	0	cell-type specific
chr1	106695993	106696220	0	cell-type specific
chr1	107127479	107127681	0	cell-type specific
chr1	107239259	107239523	0	cell-type specific
chr1	107365338	107365528	0	cell-type specific
chr1	107421909	107422116	0	cell-type specific
chr1	107654807	107654937	0	cell-type specific
chr1	107658895	107659074	0	cell-type specific
chr1	107686686	107686896	0	cell-type specific
chr1	107974490	107974618	0	cell-type specific
chr1	107985893	107986338	0	cell-type specific
chr1	107996231	107996426	0	cell-type specific
chr1	108112084	108112255	0	cell-type specific
chr1	108278596	108278778	0	cell-type specific
chr1	10833135	10833263	0	cell-type specific
chr1	108337449	108337605	0	cell-type specific
chr1	108443649	108443791	0	cell-type specific
chr1	108601200	108601388	0	cell-type specific
chr1	108787341	108787509	0	cell-type specific
chr1	108790697	108790822	0	cell-type specific
chr1	108860068	108860263	0	cell-type specific
chr1	108902991	108903289	0	cell-type specific
chr1	108910255	108910565	0	cell-type specific
chr1	109012574	109012719	0	cell-type specific
chr1	109380104	109380361	0	cell-type specific
chr1	109450789	109450950	0	cell-type specific
chr1	109887917	109888057	0	cell-type specific
chr11	100052355	100052554	0	cell-type specific
chr11	100072156	100072303	0	cell-type specific
chr11	100232977	100233106	0	cell-type specific
chr11	100517324	100517496	0	cell-type specific
chr11	100682764	100683042	0	cell-type specific
chr11	100694572	100694763	0	cell-type specific
chr11	100777973	100778174	0	cell-type specific
chr11	100821628	100821913	0	cell-type specific
chr11	100836421	100836578	0	cell-type specific
chr11	101082757	101082929	0	cell-type specific
chr11	101141876	101142044	0	cell-type specific
chr11	101410890	101411151	0	cell-type specific
chr11	101435244	101435405	0	cell-type specific
chr11	101460493	101460629	0	cell-type specific
chr11	101832408	101832675	0	cell-type specific
chr11	10219761	10219932	0	cell-type specific
chr11	102275336	102275460	0	cell-type specific
chr1	110232256	110232409	0	cell-type specific
chr11	102376378	102376515	0	cell-type specific
chr11	102380190	102380422	0	cell-type specific
chr11	102828111	102828274	0	cell-type specific
chr11	103095494	103095619	0	cell-type specific
chr11	103113259	103113385	0	cell-type specific
chr11	103116853	103117006	0	cell-type specific
chr11	103202251	103202421	0	cell-type specific
chr11	103419685	103419820	0	cell-type specific
chr11	103586391	103586517	0	cell-type specific
chr11	103889796	103889927	0	cell-type specific
chr11	104054420	104054617	0	cell-type specific
chr11	104059611	104059770	0	cell-type specific
chr11	104121553	104121692	0	cell-type specific
chr11	104260453	104260579	0	cell-type specific
chr11	104520769	104521033	0	cell-type specific
chr1	110457855	110458016	0	cell-type specific
chr11	104580919	104581163	0	cell-type specific
chr11	104758305	104758595	0	cell-type specific
chr11	104874037	104874212	0	cell-type specific
chr11	105125906	105126076	0	cell-type specific
chr11	105148212	105148346	0	cell-type specific
chr11	105313021	105313205	0	cell-type specific
chr11	105357475	105357632	0	cell-type specific
chr11	105441904	105442155	0	cell-type specific
chr11	105457564	105457718	0	cell-type specific
chr11	105690595	105690872	0	cell-type specific
chr11	105914718	105914845	0	cell-type specific
chr11	105979937	105980092	0	cell-type specific
chr1	110613779	110613928	0	cell-type specific
chr11	106257816	106257966	0	cell-type specific
chr11	106357106	106357341	0	cell-type specific
chr11	106369376	106369511	0	cell-type specific
chr11	106470861	106471040	0	cell-type specific
chr11	106590503	106590701	0	cell-type specific
chr11	106655622	106655794	0	cell-type specific
chr11	106775758	106775885	0	cell-type specific
chr11	107023857	107024088	0	cell-type specific
chr1	110721471	110721686	0	cell-type specific
chr11	107315913	107316105	0	cell-type specific
chr11	107319139	107319337	0	cell-type specific
chr11	107639048	107639207	0	cell-type specific
chr11	107652772	107653071	0	cell-type specific
chr1	110769175	110769421	0	cell-type specific
chr11	107761223	107761405	0	cell-type specific
chr11	107890880	107891046	0	cell-type specific
chr11	107996180	107996354	0	cell-type specific
chr1	110812685	110812858	0	cell-type specific
chr11	108320741	108320921	0	cell-type specific
chr11	108376366	108376603	0	cell-type specific
chr11	108422399	108422527	0	cell-type specific
chr1	110887197	110887406	0	cell-type specific
chr11	109074349	109074496	0	cell-type specific
chr11	109294545	109294694	0	cell-type specific
chr11	109306644	109306835	0	cell-type specific
chr11	109310953	109311075	0	cell-type specific
chr11	109385476	109385723	0	cell-type specific
chr11	109431651	109431800	0	cell-type specific
chr11	109612169	109612318	0	cell-type specific
chr11	110156768	110156916	0	cell-type specific
chr11	110403073	110403337	0	cell-type specific
chr11	110408927	110409062	0	cell-type specific
chr11	110467401	110467548	0	cell-type specific
chr11	110515657	110515827	0	cell-type specific
chr11	110766504	110766677	0	cell-type specific
chr11	110944285	110944484	0	cell-type specific
chr11	111194820	111194967	0	cell-type specific
chr11	111394185	111394557	0	cell-type specific
chr11	111491512	111491789	0	cell-type specific
chr11	111594529	111594708	0	cell-type specific
chr1	111195611	111195805	0	cell-type specific
chr11	111990314	111990448	0	cell-type specific
chr11	112422400	112422568	0	cell-type specific
chr11	112580693	112580892	0	cell-type specific
chr11	112657377	112657550	0	cell-type specific
chr11	112682247	112682389	0	cell-type specific
chr11	112725972	112726248	0	cell-type specific
chr11	112778608	112778755	0	cell-type specific
chr11	113057179	113057414	0	cell-type specific
chr11	113261424	113261611	0	cell-type specific
chr11	113298188	113298382	0	cell-type specific
chr11	113354646	113354880	0	cell-type specific
chr11	113443749	113443905	0	cell-type specific
chr11	113490806	113490929	0	cell-type specific
chr11	113605657	113605933	0	cell-type specific
chr11	113702877	113703036	0	cell-type specific
chr11	113943196	113943414	0	cell-type specific
chr11	114009819	114009946	0	cell-type specific
chr11	114170473	114170692	0	cell-type specific
chr11	114171768	114171912	0	cell-type specific
chr11	114317471	114317605	0	cell-type specific
chr11	114518882	114519013	0	cell-type specific
chr11	114559190	114559387	0	cell-type specific
chr11	114706232	114706410	0	cell-type specific
chr11	114852392	114852612	0	cell-type specific
chr11	11487947	11488128	0	cell-type specific
chr11	115170359	115170528	0	cell-type specific
chr11	115393186	115393322	0	cell-type specific
chr11	115434977	115435144	0	cell-type specific
chr11	115470490	115470654	0	cell-type specific
chr11	115481971	115482164	0	cell-type specific
chr11	115496980	115497111	0	cell-type specific
chr11	115538998	115539129	0	cell-type specific
chr11	115561929	115562170	0	cell-type specific
chr11	115630988	115631177	0	cell-type specific
chr11	115666664	115666857	0	cell-type specific
chr11	115666964	115667136	0	cell-type specific
chr11	115905029	115905178	0	cell-type specific
chr11	115952149	115952273	0	cell-type specific
chr11	116092405	116092592	0	cell-type specific
chr11	116201630	116201819	0	cell-type specific
chr11	116344731	116344949	0	cell-type specific
chr11	116439469	116439616	0	cell-type specific
chr11	116454404	116454572	0	cell-type specific
chr11	11653536	11653663	0	cell-type specific
chr11	116548558	116548728	0	cell-type specific
chr11	11656442	11656588	0	cell-type specific
chr11	116578348	116578607	0	cell-type specific
chr11	116597736	116597957	0	cell-type specific
chr11	116607489	116607743	0	cell-type specific
chr11	116856099	116856368	0	cell-type specific
chr11	117038095	117038240	0	cell-type specific
chr11	117081506	117081663	0	cell-type specific
chr11	117088189	117088366	0	cell-type specific
chr11	117103155	117103306	0	cell-type specific
chr11	117138828	117139019	0	cell-type specific
chr11	117227533	117227703	0	cell-type specific
chr11	117257220	117257400	0	cell-type specific
chr11	117493999	117494303	0	cell-type specific
chr11	117512077	117512246	0	cell-type specific
chr11	117536963	117537107	0	cell-type specific
chr11	117622864	117623029	0	cell-type specific
chr11	117656543	117656673	0	cell-type specific
chr11	117765022	117765195	0	cell-type specific
chr11	117859144	117859360	0	cell-type specific
chr11	117972876	117973090	0	cell-type specific
chr11	118057219	118057390	0	cell-type specific
chr11	118081254	118081378	0	cell-type specific
chr11	118104387	118104571	0	cell-type specific
chr11	11819031	11819452	0	cell-type specific
chr11	118329492	118329714	0	cell-type specific
chr11	118332392	118332559	0	cell-type specific
chr11	118368797	118369109	0	cell-type specific
chr11	11844534	11844679	0	cell-type specific
chr11	118468168	118468316	0	cell-type specific
chr11	118483403	118483613	0	cell-type specific
chr11	118526223	118526374	0	cell-type specific
chr11	118619293	118619587	0	cell-type specific
chr11	118644423	118644579	0	cell-type specific
chr11	118748233	118748471	0	cell-type specific
chr11	118785059	118785235	0	cell-type specific
chr11	118861441	118861570	0	cell-type specific
chr11	118931984	118932141	0	cell-type specific
chr11	118960865	118961084	0	cell-type specific
chr11	119101670	119101833	0	cell-type specific
chr11	119158880	119159089	0	cell-type specific
chr11	119266548	119266817	0	cell-type specific
chr11	119453006	119453238	0	cell-type specific
chr11	119461148	119461390	0	cell-type specific
chr11	119465832	119466007	0	cell-type specific
chr1	111961414	111961547	0	cell-type specific
chr11	119795944	119796201	0	cell-type specific
chr11	120531636	120531801	0	cell-type specific
chr11	120768829	120768951	0	cell-type specific
chr11	121030888	121031081	0	cell-type specific
chr11	121127430	121127807	0	cell-type specific
chr11	121305701	121305853	0	cell-type specific
chr11	121318160	121318284	0	cell-type specific
chr11	121321355	121321547	0	cell-type specific
chr1	112148277	112148477	0	cell-type specific
chr11	121564878	121565019	0	cell-type specific
chr1	112426134	112426439	0	cell-type specific
chr1	112468216	112468380	0	cell-type specific
chr11	12475951	12476154	0	cell-type specific
chr11	12505218	12505391	0	cell-type specific
chr11	12533574	12533782	0	cell-type specific
chr1	112559627	112559840	0	cell-type specific
chr1	112593185	112593328	0	cell-type specific
chr11	12706997	12707142	0	cell-type specific
chr11	12784077	12784258	0	cell-type specific
chr11	12825951	12826143	0	cell-type specific
chr1	112944388	112944641	0	cell-type specific
chr1	112946325	112946508	0	cell-type specific
chr11	13137227	13137369	0	cell-type specific
chr11	13168181	13168375	0	cell-type specific
chr1	113481728	113481880	0	cell-type specific
chr11	13510242	13510374	0	cell-type specific
chr11	13584761	13584896	0	cell-type specific
chr11	13759287	13759481	0	cell-type specific
chr11	13801714	13801934	0	cell-type specific
chr1	113818298	113818463	0	cell-type specific
chr1	114301067	114301253	0	cell-type specific
chr11	14689922	14690177	0	cell-type specific
chr11	14703567	14703783	0	cell-type specific
chr1	114869872	114870002	0	cell-type specific
chr1	115015764	115015904	0	cell-type specific
chr1	115032532	115032721	0	cell-type specific
chr1	115066073	115066332	0	cell-type specific
chr1	11511604	11511738	0	cell-type specific
chr1	115195120	115195281	0	cell-type specific
chr1	115210474	115210610	0	cell-type specific
chr11	15215252	15215402	0	cell-type specific
chr1	115221991	115222154	0	cell-type specific
chr1	115363483	115363646	0	cell-type specific
chr1	115364617	115364846	0	cell-type specific
chr1	115423761	115423894	0	cell-type specific
chr1	115512314	115512452	0	cell-type specific
chr1	115513093	115513289	0	cell-type specific
chr1	115586815	115586982	0	cell-type specific
chr11	15961339	15961535	0	cell-type specific
chr11	16004591	16004750	0	cell-type specific
chr1	116063437	116063634	0	cell-type specific
chr11	16245117	16245318	0	cell-type specific
chr11	16333428	16333689	0	cell-type specific
chr11	16337902	16338094	0	cell-type specific
chr1	116390354	116390499	0	cell-type specific
chr1	11640201	11640405	0	cell-type specific
chr1	116527607	116527803	0	cell-type specific
chr1	116549924	116550059	0	cell-type specific
chr11	16594756	16594918	0	cell-type specific
chr1	116644116	116644276	0	cell-type specific
chr1	116743153	116743300	0	cell-type specific
chr11	16822555	16822797	0	cell-type specific
chr1	11694275	11694533	0	cell-type specific
chr1	116950903	116951146	0	cell-type specific
chr11	17137648	17137801	0	cell-type specific
chr1	117277536	117277833	0	cell-type specific
chr11	17335839	17335979	0	cell-type specific
chr1	117415482	117415654	0	cell-type specific
chr1	11741765	11741929	0	cell-type specific
chr1	117483419	117483571	0	cell-type specific
chr1	117587714	117587856	0	cell-type specific
chr1	11764976	11765226	0	cell-type specific
chr1	117655023	117655173	0	cell-type specific
chr11	17728116	17728255	0	cell-type specific
chr1	117751688	117751827	0	cell-type specific
chr11	17901657	17901907	0	cell-type specific
chr1	11790816	11791114	0	cell-type specific
chr11	17956402	17956551	0	cell-type specific
chr1	118175673	118175843	0	cell-type specific
chr11	18270506	18270803	0	cell-type specific
chr11	18672650	18672790	0	cell-type specific
chr11	18790653	18790834	0	cell-type specific
chr1	119099393	119099568	0	cell-type specific
chr1	119182599	119182759	0	cell-type specific
chr11	19381180	19381317	0	cell-type specific
chr1	119383562	119383823	0	cell-type specific
chr1	119417085	119417257	0	cell-type specific
chr11	19490266	19490398	0	cell-type specific
chr1	119672697	119672877	0	cell-type specific
chr11	19710147	19710307	0	cell-type specific
chr11	19775035	19775284	0	cell-type specific
chr11	19780759	19780916	0	cell-type specific
chr1	119832884	119833050	0	cell-type specific
chr11	19858021	19858216	0	cell-type specific
chr1	119938580	119938784	0	cell-type specific
chr1	119990724	119990885	0	cell-type specific
chr1	120138333	120138541	0	cell-type specific
chr11	20162415	20162633	0	cell-type specific
chr11	20234624	20234780	0	cell-type specific
chr1	120346955	120347101	0	cell-type specific
chr11	20373717	20373844	0	cell-type specific
chr11	20384935	20385203	0	cell-type specific
chr1	120485937	120486090	0	cell-type specific
chr1	120539106	120539334	0	cell-type specific
chr1	120563231	120563368	0	cell-type specific
chr1	120652453	120652748	0	cell-type specific
chr1	120671784	120671982	0	cell-type specific
chr1	120758644	120758804	0	cell-type specific
chr1	120998665	120998906	0	cell-type specific
chr1	12100745	12101043	0	cell-type specific
chr1	121021657	121021815	0	cell-type specific
chr1	121024791	121024922	0	cell-type specific
chr1	121058707	121058832	0	cell-type specific
chr1	121099250	121099439	0	cell-type specific
chr1	121146519	121146758	0	cell-type specific
chr1	121181273	121181426	0	cell-type specific
chr1	121247431	121247606	0	cell-type specific
chr1	121273172	121273338	0	cell-type specific
chr11	21303421	21303601	0	cell-type specific
chr1	121425805	121426045	0	cell-type specific
chr1	121446787	121447016	0	cell-type specific
chr11	21476719	21476876	0	cell-type specific
chr1	121499576	121499920	0	cell-type specific
chr11	21708373	21708521	0	cell-type specific
chr1	121725683	121725840	0	cell-type specific
chr1	121746182	121746560	0	cell-type specific
chr11	21765858	21766060	0	cell-type specific
chr1	121802407	121802626	0	cell-type specific
chr11	21818157	21818317	0	cell-type specific
chr11	21827208	21827361	0	cell-type specific
chr1	12184180	12184357	0	cell-type specific
chr11	21944579	21944741	0	cell-type specific
chr1	121956023	121956276	0	cell-type specific
chr1	122086659	122086828	0	cell-type specific
chr1	122175737	122175877	0	cell-type specific
chr11	22176868	22177037	0	cell-type specific
chr11	22177273	22177416	0	cell-type specific
chr1	122221279	122221437	0	cell-type specific
chr1	12235036	12235173	0	cell-type specific
chr1	122402755	122402885	0	cell-type specific
chr11	22433408	22433537	0	cell-type specific
chr11	22434437	22434615	0	cell-type specific
chr11	22452457	22452646	0	cell-type specific
chr1	122462092	122462300	0	cell-type specific
chr1	122524888	122525044	0	cell-type specific
chr1	122719742	122719896	0	cell-type specific
chr11	22782988	22783190	0	cell-type specific
chr11	22819948	22820106	0	cell-type specific
chr1	122843621	122843762	0	cell-type specific
chr11	22859786	22859939	0	cell-type specific
chr11	22865373	22865526	0	cell-type specific
chr1	122964141	122964339	0	cell-type specific
chr1	122965428	122965664	0	cell-type specific
chr11	22995197	22995367	0	cell-type specific
chr1	123037197	123037371	0	cell-type specific
chr11	23105726	23105890	0	cell-type specific
chr1	123150416	123150704	0	cell-type specific
chr1	12316544	12316743	0	cell-type specific
chr1	123312383	123312623	0	cell-type specific
chr11	23324875	23325014	0	cell-type specific
chr1	123433309	123433529	0	cell-type specific
chr1	123444876	123445041	0	cell-type specific
chr1	123445715	123445898	0	cell-type specific
chr1	123450206	123450337	0	cell-type specific
chr11	23561022	23561179	0	cell-type specific
chr1	123595639	123596051	0	cell-type specific
chr1	12362406	12362680	0	cell-type specific
chr1	123644395	123644599	0	cell-type specific
chr1	123716251	123716391	0	cell-type specific
chr1	12378338	12378538	0	cell-type specific
chr11	23803631	23803785	0	cell-type specific
chr11	23834653	23834846	0	cell-type specific
chr1	123917278	123917420	0	cell-type specific
chr11	23970366	23970519	0	cell-type specific
chr11	24154643	24154837	0	cell-type specific
chr11	24227267	24227493	0	cell-type specific
chr1	124229888	124230027	0	cell-type specific
chr1	124252288	124252580	0	cell-type specific
chr11	24278479	24278745	0	cell-type specific
chr11	24319785	24319995	0	cell-type specific
chr1	12434993	12435140	0	cell-type specific
chr1	124412914	124413040	0	cell-type specific
chr11	24556345	24556506	0	cell-type specific
chr1	124659706	124659941	0	cell-type specific
chr11	24689132	24689272	0	cell-type specific
chr1	124740849	124741048	0	cell-type specific
chr1	124756012	124756171	0	cell-type specific
chr11	24941303	24941500	0	cell-type specific
chr1	124989951	124990086	0	cell-type specific
chr1	125051340	125051622	0	cell-type specific
chr1	125111968	125112125	0	cell-type specific
chr11	25184721	25184866	0	cell-type specific
chr11	25401562	25401713	0	cell-type specific
chr1	125564898	125565061	0	cell-type specific
chr1	125567127	125567285	0	cell-type specific
chr1	125639902	125640164	0	cell-type specific
chr11	25747638	25747779	0	cell-type specific
chr11	25843289	25843465	0	cell-type specific
chr1	125870887	125871133	0	cell-type specific
chr11	25913066	25913232	0	cell-type specific
chr11	26101595	26101750	0	cell-type specific
chr11	26102403	26102539	0	cell-type specific
chr11	26141842	26142040	0	cell-type specific
chr11	26244640	26244772	0	cell-type specific
chr1	12634669	12634834	0	cell-type specific
chr1	126400234	126400530	0	cell-type specific
chr1	126404974	126405123	0	cell-type specific
chr1	126414441	126414606	0	cell-type specific
chr1	126434047	126434290	0	cell-type specific
chr11	26598075	26598256	0	cell-type specific
chr1	126739338	126739550	0	cell-type specific
chr11	26776935	26777113	0	cell-type specific
chr1	126833849	126833997	0	cell-type specific
chr11	26895978	26896181	0	cell-type specific
chr1	127105822	127105964	0	cell-type specific
chr1	127132960	127133343	0	cell-type specific
chr1	127266295	127266428	0	cell-type specific
chr11	27427584	27427732	0	cell-type specific
chr1	127491180	127491308	0	cell-type specific
chr1	127551886	127552044	0	cell-type specific
chr1	127603284	127603421	0	cell-type specific
chr1	127645576	127645755	0	cell-type specific
chr11	27652911	27653070	0	cell-type specific
chr1	127670864	127671066	0	cell-type specific
chr11	27676892	27677101	0	cell-type specific
chr11	27730614	27730793	0	cell-type specific
chr1	127860073	127860245	0	cell-type specific
chr1	127874595	127874808	0	cell-type specific
chr1	127911224	127911452	0	cell-type specific
chr1	12797503	12797675	0	cell-type specific
chr1	128089690	128089966	0	cell-type specific
chr1	128111697	128111865	0	cell-type specific
chr11	28127474	28127664	0	cell-type specific
chr11	28156294	28156571	0	cell-type specific
chr11	28164772	28165071	0	cell-type specific
chr1	128211934	128212097	0	cell-type specific
chr1	128252115	128252271	0	cell-type specific
chr11	28288757	28288943	0	cell-type specific
chr1	128335349	128335591	0	cell-type specific
chr1	128448661	128448994	0	cell-type specific
chr1	12853473	12853618	0	cell-type specific
chr1	128627790	128627927	0	cell-type specific
chr1	128734867	128735082	0	cell-type specific
chr11	28909355	28909497	0	cell-type specific
chr11	28922802	28922940	0	cell-type specific
chr11	29004575	29004754	0	cell-type specific
chr1	129083064	129083219	0	cell-type specific
chr1	129109963	129110143	0	cell-type specific
chr1	129122840	129122996	0	cell-type specific
chr11	29247810	29247996	0	cell-type specific
chr11	29269113	29269239	0	cell-type specific
chr11	29567838	29568025	0	cell-type specific
chr1	129592527	129592656	0	cell-type specific
chr1	129685025	129685189	0	cell-type specific
chr11	29795398	29795568	0	cell-type specific
chr1	129807279	129807445	0	cell-type specific
chr1	12984936	12985088	0	cell-type specific
chr11	29916082	29916293	0	cell-type specific
chr11	29917852	29918047	0	cell-type specific
chr1	129923288	129923438	0	cell-type specific
chr11	29974948	29975162	0	cell-type specific
chr11	30018108	30018279	0	cell-type specific
chr11	30100760	30100952	0	cell-type specific
chr11	30122232	30122382	0	cell-type specific
chr1	130141589	130141738	0	cell-type specific
chr1	130145106	130145287	0	cell-type specific
chr11	30153504	30153718	0	cell-type specific
chr1	130160594	130160744	0	cell-type specific
chr1	130170347	130170577	0	cell-type specific
chr1	130299211	130299391	0	cell-type specific
chr11	30317452	30317578	0	cell-type specific
chr1	130360990	130361144	0	cell-type specific
chr1	130461840	130461998	0	cell-type specific
chr11	30627702	30627847	0	cell-type specific
chr11	30741755	30741906	0	cell-type specific
chr11	30808320	30808486	0	cell-type specific
chr11	30838434	30838563	0	cell-type specific
chr1	130878210	130878401	0	cell-type specific
chr1	130909103	130909232	0	cell-type specific
chr1	130998170	130998355	0	cell-type specific
chr1	131126269	131126409	0	cell-type specific
chr1	131207907	131208117	0	cell-type specific
chr1	131371823	131371961	0	cell-type specific
chr1	131376111	131376270	0	cell-type specific
chr11	31390427	31390636	0	cell-type specific
chr11	31422936	31423087	0	cell-type specific
chr11	3149657	3149816	0	cell-type specific
chr1	131521279	131521441	0	cell-type specific
chr11	3156302	3156524	0	cell-type specific
chr11	31610142	31610319	0	cell-type specific
chr11	31746575	31746849	0	cell-type specific
chr1	131819054	131819189	0	cell-type specific
chr11	31978814	31979011	0	cell-type specific
chr11	32002506	32002655	0	cell-type specific
chr11	32011110	32011410	0	cell-type specific
chr11	32049604	32049727	0	cell-type specific
chr11	32140371	32140520	0	cell-type specific
chr1	132154684	132154964	0	cell-type specific
chr1	132175807	132176115	0	cell-type specific
chr11	32186018	32186173	0	cell-type specific
chr11	3219788	3220008	0	cell-type specific
chr1	132298562	132298773	0	cell-type specific
chr1	132307765	132307903	0	cell-type specific
chr1	132402564	132402720	0	cell-type specific
chr11	32475142	32475378	0	cell-type specific
chr1	13251826	13251999	0	cell-type specific
chr1	132536082	132536240	0	cell-type specific
chr11	32764252	32764479	0	cell-type specific
chr1	132767461	132767592	0	cell-type specific
chr11	32773592	32773840	0	cell-type specific
chr1	132863067	132863243	0	cell-type specific
chr1	132875702	132875873	0	cell-type specific
chr1	132975004	132975159	0	cell-type specific
chr11	33123627	33123800	0	cell-type specific
chr1	133152542	133152710	0	cell-type specific
chr11	33163141	33163309	0	cell-type specific
chr11	33208664	33208831	0	cell-type specific
chr11	33288014	33288204	0	cell-type specific
chr1	133289032	133289208	0	cell-type specific
chr1	133301920	133302228	0	cell-type specific
chr1	133323408	133323545	0	cell-type specific
chr1	13345661	13345859	0	cell-type specific
chr11	33502101	33502241	0	cell-type specific
chr11	33567003	33567164	0	cell-type specific
chr11	33604177	33604322	0	cell-type specific
chr1	133726117	133726295	0	cell-type specific
chr1	133925952	133926161	0	cell-type specific
chr11	33934127	33934284	0	cell-type specific
chr1	133951656	133951857	0	cell-type specific
chr1	134088416	134088613	0	cell-type specific
chr1	134109826	134109948	0	cell-type specific
chr1	134164039	134164180	0	cell-type specific
chr11	34172804	34172934	0	cell-type specific
chr1	134190627	134190875	0	cell-type specific
chr11	34211430	34211554	0	cell-type specific
chr1	134314594	134314991	0	cell-type specific
chr11	34415109	34415290	0	cell-type specific
chr1	134457242	134457394	0	cell-type specific
chr1	134503247	134503386	0	cell-type specific
chr11	34503544	34503743	0	cell-type specific
chr1	134544375	134544585	0	cell-type specific
chr1	134615444	134615573	0	cell-type specific
chr11	34645957	34646111	0	cell-type specific
chr11	34726868	34727110	0	cell-type specific
chr1	134739869	134739995	0	cell-type specific
chr1	134811774	134811943	0	cell-type specific
chr11	34953962	34954093	0	cell-type specific
chr1	135098738	135099038	0	cell-type specific
chr11	35102121	35102314	0	cell-type specific
chr11	35109034	35109229	0	cell-type specific
chr11	35231934	35232129	0	cell-type specific
chr1	135338063	135338231	0	cell-type specific
chr1	135346814	135347012	0	cell-type specific
chr1	135355582	135355735	0	cell-type specific
chr11	35421947	35422109	0	cell-type specific
chr11	35457221	35457355	0	cell-type specific
chr1	135555960	135556184	0	cell-type specific
chr1	135615075	135615314	0	cell-type specific
chr11	35630965	35631100	0	cell-type specific
chr1	135679133	135679262	0	cell-type specific
chr11	35734456	35734608	0	cell-type specific
chr1	135801192	135801387	0	cell-type specific
chr1	135816296	135816431	0	cell-type specific
chr1	135845500	135845700	0	cell-type specific
chr1	135849158	135849289	0	cell-type specific
chr11	35908996	35909176	0	cell-type specific
chr1	135913515	135913780	0	cell-type specific
chr1	135919643	135919784	0	cell-type specific
chr1	136031386	136031523	0	cell-type specific
chr1	136064117	136064321	0	cell-type specific
chr1	136118057	136118192	0	cell-type specific
chr1	136180201	136180326	0	cell-type specific
chr1	136253787	136253924	0	cell-type specific
chr1	136405624	136405763	0	cell-type specific
chr11	36420561	36420694	0	cell-type specific
chr1	136474188	136474342	0	cell-type specific
chr1	13648413	13648585	0	cell-type specific
chr11	36541412	36541614	0	cell-type specific
chr1	136645561	136645751	0	cell-type specific
chr11	3670501	3670638	0	cell-type specific
chr11	3676080	3676216	0	cell-type specific
chr1	136876804	136877034	0	cell-type specific
chr1	136962921	136963049	0	cell-type specific
chr1	137063499	137063667	0	cell-type specific
chr1	137077127	137077276	0	cell-type specific
chr1	137146554	137146965	0	cell-type specific
chr1	137152665	137152787	0	cell-type specific
chr11	37163814	37164025	0	cell-type specific
chr11	37206385	37206524	0	cell-type specific
chr1	137208742	137209017	0	cell-type specific
chr1	137308100	137308228	0	cell-type specific
chr11	3735221	3735487	0	cell-type specific
chr1	137363264	137363414	0	cell-type specific
chr1	137372193	137372326	0	cell-type specific
chr11	3737903	3738077	0	cell-type specific
chr1	137394746	137394939	0	cell-type specific
chr11	37467184	37467323	0	cell-type specific
chr11	3751352	3751497	0	cell-type specific
chr1	137600612	137600746	0	cell-type specific
chr1	137615836	137616005	0	cell-type specific
chr11	37625045	37625231	0	cell-type specific
chr1	137707102	137707242	0	cell-type specific
chr11	37912252	37912402	0	cell-type specific
chr11	37960526	37960731	0	cell-type specific
chr1	138017146	138017279	0	cell-type specific
chr1	138127614	138127912	0	cell-type specific
chr11	3817585	3817723	0	cell-type specific
chr1	138199658	138199793	0	cell-type specific
chr1	138214212	138214365	0	cell-type specific
chr1	138296418	138296561	0	cell-type specific
chr1	138442712	138442902	0	cell-type specific
chr1	138514154	138514303	0	cell-type specific
chr1	138540756	138540964	0	cell-type specific
chr1	138617924	138618056	0	cell-type specific
chr1	138679934	138680083	0	cell-type specific
chr1	138748249	138748394	0	cell-type specific
chr1	138762804	138762929	0	cell-type specific
chr1	138804215	138804339	0	cell-type specific
chr1	138823989	138824213	0	cell-type specific
chr11	38856127	38856310	0	cell-type specific
chr1	13894430	13894586	0	cell-type specific
chr11	39000551	39000771	0	cell-type specific
chr1	139090933	139091098	0	cell-type specific
chr1	139105242	139105499	0	cell-type specific
chr1	139127048	139127170	0	cell-type specific
chr1	139229321	139229483	0	cell-type specific
chr11	39312270	39312460	0	cell-type specific
chr1	13939392	13939632	0	cell-type specific
chr11	39410794	39410932	0	cell-type specific
chr11	39414532	39414694	0	cell-type specific
chr1	13949013	13949260	0	cell-type specific
chr11	39606706	39606836	0	cell-type specific
chr11	39668996	39669162	0	cell-type specific
chr11	39905788	39905998	0	cell-type specific
chr1	140005232	140005379	0	cell-type specific
chr1	140315611	140315803	0	cell-type specific
chr1	140316946	140317110	0	cell-type specific
chr11	40349265	40349439	0	cell-type specific
chr11	40351072	40351222	0	cell-type specific
chr1	140368249	140368413	0	cell-type specific
chr11	40393302	40393456	0	cell-type specific
chr1	140468315	140468442	0	cell-type specific
chr11	40490180	40490402	0	cell-type specific
chr11	40499307	40499439	0	cell-type specific
chr1	140568302	140568493	0	cell-type specific
chr1	140578008	140578184	0	cell-type specific
chr11	40594311	40594450	0	cell-type specific
chr1	140662667	140662860	0	cell-type specific
chr11	4066731	4066899	0	cell-type specific
chr11	40703204	40703371	0	cell-type specific
chr11	40712427	40712560	0	cell-type specific
chr11	4073086	4073302	0	cell-type specific
chr11	40749965	40750146	0	cell-type specific
chr1	140882668	140883016	0	cell-type specific
chr1	140888081	140888281	0	cell-type specific
chr1	140905121	140905277	0	cell-type specific
chr1	140929728	140929865	0	cell-type specific
chr11	40986553	40986755	0	cell-type specific
chr1	141053726	141053863	0	cell-type specific
chr11	41063944	41064165	0	cell-type specific
chr1	141159172	141159416	0	cell-type specific
chr1	141332322	141332458	0	cell-type specific
chr11	41345268	41345455	0	cell-type specific
chr1	14153409	14153615	0	cell-type specific
chr11	41741758	41741913	0	cell-type specific
chr11	41844112	41844277	0	cell-type specific
chr1	141877855	141878057	0	cell-type specific
chr1	141881031	141881297	0	cell-type specific
chr1	141897549	141897678	0	cell-type specific
chr1	141912764	141912966	0	cell-type specific
chr11	4191415	4191633	0	cell-type specific
chr1	141948393	141948635	0	cell-type specific
chr1	142046050	142046178	0	cell-type specific
chr1	142115764	142115968	0	cell-type specific
chr1	142135621	142135824	0	cell-type specific
chr11	42151455	42151631	0	cell-type specific
chr11	42196375	42196545	0	cell-type specific
chr1	142219326	142219554	0	cell-type specific
chr1	142296821	142296959	0	cell-type specific
chr1	142341325	142341485	0	cell-type specific
chr1	142455028	142455366	0	cell-type specific
chr1	142467659	142467842	0	cell-type specific
chr1	142478581	142478719	0	cell-type specific
chr1	142527209	142527491	0	cell-type specific
chr1	142616106	142616331	0	cell-type specific
chr1	142643585	142643803	0	cell-type specific
chr1	142760308	142760500	0	cell-type specific
chr1	142892229	142892394	0	cell-type specific
chr1	142896011	142896142	0	cell-type specific
chr1	143041918	143042061	0	cell-type specific
chr1	143228860	143229045	0	cell-type specific
chr11	43251054	43251256	0	cell-type specific
chr1	143351676	143351820	0	cell-type specific
chr11	43352322	43352460	0	cell-type specific
chr11	43375132	43375272	0	cell-type specific
chr11	43394302	43394472	0	cell-type specific
chr11	43408936	43409110	0	cell-type specific
chr11	43643411	43643568	0	cell-type specific
chr1	143739723	143739953	0	cell-type specific
chr1	143997903	143998087	0	cell-type specific
chr11	44233667	44233916	0	cell-type specific
chr1	144251780	144251941	0	cell-type specific
chr1	144283865	144284007	0	cell-type specific
chr1	144351441	144351592	0	cell-type specific
chr11	4454124	4454265	0	cell-type specific
chr11	44725651	44725817	0	cell-type specific
chr1	144792756	144792927	0	cell-type specific
chr11	44862668	44862841	0	cell-type specific
chr11	44956592	44956731	0	cell-type specific
chr1	144958508	144958654	0	cell-type specific
chr11	44993506	44993778	0	cell-type specific
chr11	45084897	45085077	0	cell-type specific
chr11	45223214	45223470	0	cell-type specific
chr1	145259458	145259622	0	cell-type specific
chr1	145376916	145377057	0	cell-type specific
chr1	145529936	145530085	0	cell-type specific
chr1	145616561	145616756	0	cell-type specific
chr1	145620384	145620580	0	cell-type specific
chr1	145660691	145660968	0	cell-type specific
chr11	45694330	45694476	0	cell-type specific
chr11	45792887	45793026	0	cell-type specific
chr1	145825189	145825331	0	cell-type specific
chr1	145832305	145832502	0	cell-type specific
chr1	14588782	14588931	0	cell-type specific
chr1	14590625	14590800	0	cell-type specific
chr1	146027415	146027567	0	cell-type specific
chr11	46029865	46030102	0	cell-type specific
chr1	146080293	146080426	0	cell-type specific
chr11	46096924	46097102	0	cell-type specific
chr1	146137899	146138064	0	cell-type specific
chr1	146265765	146265949	0	cell-type specific
chr1	146295672	146295882	0	cell-type specific
chr11	46472509	46472703	0	cell-type specific
chr11	46494181	46494387	0	cell-type specific
chr1	146584443	146584663	0	cell-type specific
chr11	46629228	46629357	0	cell-type specific
chr11	46725452	46725620	0	cell-type specific
chr11	46819923	46820137	0	cell-type specific
chr11	46902757	46903022	0	cell-type specific
chr1	146923745	146923922	0	cell-type specific
chr1	146978223	146978621	0	cell-type specific
chr11	4720245	4720407	0	cell-type specific
chr1	147312473	147312648	0	cell-type specific
chr1	147537058	147537218	0	cell-type specific
chr1	147909418	147909681	0	cell-type specific
chr1	14794145	14794384	0	cell-type specific
chr1	147964432	147964633	0	cell-type specific
chr1	148014852	148015053	0	cell-type specific
chr11	48015271	48015438	0	cell-type specific
chr11	48387765	48387965	0	cell-type specific
chr1	14848320	14848641	0	cell-type specific
chr11	48536357	48536547	0	cell-type specific
chr1	148560364	148560588	0	cell-type specific
chr1	148614236	148614427	0	cell-type specific
chr1	149151312	149151497	0	cell-type specific
chr1	149223585	149223819	0	cell-type specific
chr11	49294117	49294336	0	cell-type specific
chr1	14932406	14932575	0	cell-type specific
chr11	49472712	49472875	0	cell-type specific
chr1	14970043	14970178	0	cell-type specific
chr11	49718421	49718627	0	cell-type specific
chr11	49764715	49764837	0	cell-type specific
chr1	149788595	149788773	0	cell-type specific
chr11	49805519	49805741	0	cell-type specific
chr11	49835494	49835643	0	cell-type specific
chr11	49840394	49840522	0	cell-type specific
chr1	149881673	149881882	0	cell-type specific
chr11	49952295	49952457	0	cell-type specific
chr1	149997759	149997988	0	cell-type specific
chr1	150207048	150207278	0	cell-type specific
chr11	50212674	50212824	0	cell-type specific
chr11	50215269	50215408	0	cell-type specific
chr11	5023413	5023743	0	cell-type specific
chr11	50266976	50267123	0	cell-type specific
chr11	50313129	50313282	0	cell-type specific
chr1	150328615	150328790	0	cell-type specific
chr1	150340731	150340891	0	cell-type specific
chr11	5056579	5056862	0	cell-type specific
chr1	15058841	15059014	0	cell-type specific
chr11	50622546	50622729	0	cell-type specific
chr11	5071366	5071514	0	cell-type specific
chr11	50986941	50987071	0	cell-type specific
chr11	51000142	51000312	0	cell-type specific
chr1	15111211	15111382	0	cell-type specific
chr11	51311340	51311486	0	cell-type specific
chr1	151335873	151336035	0	cell-type specific
chr11	51350180	51350400	0	cell-type specific
chr11	51352273	51352397	0	cell-type specific
chr11	51750646	51750784	0	cell-type specific
chr1	15176019	15176248	0	cell-type specific
chr11	51828570	51828732	0	cell-type specific
chr11	51859243	51859404	0	cell-type specific
chr11	51862343	51862487	0	cell-type specific
chr1	151877999	151878184	0	cell-type specific
chr11	52031478	52031651	0	cell-type specific
chr11	52052221	52052378	0	cell-type specific
chr11	52067230	52067378	0	cell-type specific
chr1	152131376	152131522	0	cell-type specific
chr1	152154472	152154724	0	cell-type specific
chr11	52176090	52176309	0	cell-type specific
chr11	52177318	52177534	0	cell-type specific
chr1	152246365	152246524	0	cell-type specific
chr1	152273479	152273696	0	cell-type specific
chr1	152317016	152317223	0	cell-type specific
chr1	152402616	152402772	0	cell-type specific
chr1	152415908	152416057	0	cell-type specific
chr1	152437001	152437145	0	cell-type specific
chr1	152465691	152465838	0	cell-type specific
chr11	52528729	52528967	0	cell-type specific
chr1	152626868	152626996	0	cell-type specific
chr1	152667404	152667679	0	cell-type specific
chr1	152839586	152839746	0	cell-type specific
chr1	152881574	152881705	0	cell-type specific
chr1	152929735	152929937	0	cell-type specific
chr1	152933499	152933712	0	cell-type specific
chr11	52948257	52948574	0	cell-type specific
chr1	153138721	153138893	0	cell-type specific
chr11	53172354	53172543	0	cell-type specific
chr11	53174702	53174851	0	cell-type specific
chr11	53225660	53225872	0	cell-type specific
chr1	153339972	153340097	0	cell-type specific
chr1	153376580	153376709	0	cell-type specific
chr1	153392392	153392630	0	cell-type specific
chr1	15368312	15368600	0	cell-type specific
chr1	153775985	153776159	0	cell-type specific
chr1	153804745	153804921	0	cell-type specific
chr11	53897145	53897268	0	cell-type specific
chr11	53906188	53906409	0	cell-type specific
chr1	153913970	153914384	0	cell-type specific
chr11	53956919	53957090	0	cell-type specific
chr1	154006102	154006248	0	cell-type specific
chr1	154169071	154169366	0	cell-type specific
chr11	5417534	5417667	0	cell-type specific
chr1	154369449	154369589	0	cell-type specific
chr11	54401396	54401571	0	cell-type specific
chr11	54479757	54480057	0	cell-type specific
chr1	154636754	154636927	0	cell-type specific
chr1	154709641	154709774	0	cell-type specific
chr1	154755522	154755703	0	cell-type specific
chr1	155119381	155119580	0	cell-type specific
chr1	155123541	155123711	0	cell-type specific
chr11	55133632	55133788	0	cell-type specific
chr11	55164403	55164604	0	cell-type specific
chr11	55184199	55184351	0	cell-type specific
chr1	155233508	155233714	0	cell-type specific
chr1	155300184	155300339	0	cell-type specific
chr1	155331904	155332026	0	cell-type specific
chr1	15534580	15534727	0	cell-type specific
chr1	15537992	15538153	0	cell-type specific
chr1	155457529	155457692	0	cell-type specific
chr1	155550045	155550305	0	cell-type specific
chr1	155727387	155727639	0	cell-type specific
chr11	55772648	55772937	0	cell-type specific
chr11	55794718	55794868	0	cell-type specific
chr1	155867535	155867796	0	cell-type specific
chr1	155874752	155874933	0	cell-type specific
chr11	55909319	55909532	0	cell-type specific
chr11	55913690	55914043	0	cell-type specific
chr11	55932437	55932573	0	cell-type specific
chr11	5608542	5608806	0	cell-type specific
chr1	156125573	156125727	0	cell-type specific
chr1	15622873	15623017	0	cell-type specific
chr11	5625748	5626062	0	cell-type specific
chr1	156299104	156299286	0	cell-type specific
chr1	15637592	15637751	0	cell-type specific
chr1	156414899	156415086	0	cell-type specific
chr1	156513276	156513402	0	cell-type specific
chr1	156521429	156521636	0	cell-type specific
chr11	56740570	56740959	0	cell-type specific
chr11	56874711	56874852	0	cell-type specific
chr1	157020092	157020489	0	cell-type specific
chr1	157114994	157115167	0	cell-type specific
chr11	57154381	57154523	0	cell-type specific
chr11	57185223	57185396	0	cell-type specific
chr11	5726064	5726260	0	cell-type specific
chr1	157321700	157321919	0	cell-type specific
chr1	157323512	157323784	0	cell-type specific
chr1	15736954	15737086	0	cell-type specific
chr1	15742551	15742736	0	cell-type specific
chr1	157464932	157465153	0	cell-type specific
chr11	57560467	57560609	0	cell-type specific
chr1	157566543	157566712	0	cell-type specific
chr1	157578087	157578249	0	cell-type specific
chr1	15761890	15762064	0	cell-type specific
chr1	15762393	15762554	0	cell-type specific
chr1	15763801	15763949	0	cell-type specific
chr11	57638415	57638550	0	cell-type specific
chr11	57727703	57727837	0	cell-type specific
chr1	157756598	157756898	0	cell-type specific
chr1	15782398	15782607	0	cell-type specific
chr1	15783025	15783147	0	cell-type specific
chr1	157920989	157921125	0	cell-type specific
chr11	57945670	57945827	0	cell-type specific
chr1	157947121	157947304	0	cell-type specific
chr11	5808539	5808802	0	cell-type specific
chr11	58111789	58111949	0	cell-type specific
chr1	158124547	158124863	0	cell-type specific
chr1	158170928	158171179	0	cell-type specific
chr1	15817427	15817657	0	cell-type specific
chr1	15818403	15818606	0	cell-type specific
chr1	158203617	158203814	0	cell-type specific
chr11	58399418	58399616	0	cell-type specific
chr1	158448984	158449136	0	cell-type specific
chr1	15851074	15851232	0	cell-type specific
chr1	158524311	158524527	0	cell-type specific
chr1	158526178	158526384	0	cell-type specific
chr1	158532509	158532782	0	cell-type specific
chr11	58731207	58731400	0	cell-type specific
chr1	158796597	158796849	0	cell-type specific
chr11	58803411	58803540	0	cell-type specific
chr1	158876657	158876805	0	cell-type specific
chr11	5898294	5898686	0	cell-type specific
chr1	159064861	159065037	0	cell-type specific
chr1	159189143	159189303	0	cell-type specific
chr11	59262715	59262853	0	cell-type specific
chr1	159418686	159418840	0	cell-type specific
chr1	159430726	159430879	0	cell-type specific
chr11	59446121	59446272	0	cell-type specific
chr1	159688071	159688240	0	cell-type specific
chr1	159806689	159806825	0	cell-type specific
chr11	5995137	5995265	0	cell-type specific
chr11	60009595	60009731	0	cell-type specific
chr1	160028384	160028686	0	cell-type specific
chr1	160156351	160156551	0	cell-type specific
chr1	160246656	160246915	0	cell-type specific
chr11	60284087	60284423	0	cell-type specific
chr1	160367724	160367961	0	cell-type specific
chr1	160430765	160430935	0	cell-type specific
chr1	160465806	160465949	0	cell-type specific
chr1	160468962	160469234	0	cell-type specific
chr11	60516440	60516614	0	cell-type specific
chr1	160669267	160669449	0	cell-type specific
chr11	60673923	60674171	0	cell-type specific
chr11	60787109	60787345	0	cell-type specific
chr11	6078879	6079099	0	cell-type specific
chr11	60804886	60805065	0	cell-type specific
chr1	160821738	160821878	0	cell-type specific
chr1	160824229	160824397	0	cell-type specific
chr1	16093834	16094021	0	cell-type specific
chr11	61101736	61102022	0	cell-type specific
chr11	6113637	6113814	0	cell-type specific
chr1	161172945	161173261	0	cell-type specific
chr1	161208778	161209065	0	cell-type specific
chr1	161209786	161209913	0	cell-type specific
chr11	61216555	61216701	0	cell-type specific
chr11	61283943	61284110	0	cell-type specific
chr11	61320090	61320236	0	cell-type specific
chr11	61327437	61327583	0	cell-type specific
chr1	16134123	16134276	0	cell-type specific
chr11	61447037	61447224	0	cell-type specific
chr1	161481420	161481556	0	cell-type specific
chr1	161495409	161495545	0	cell-type specific
chr1	161511424	161511597	0	cell-type specific
chr1	161611948	161612265	0	cell-type specific
chr1	161704403	161704600	0	cell-type specific
chr11	61808356	61808510	0	cell-type specific
chr1	161946098	161946233	0	cell-type specific
chr11	6197779	6197914	0	cell-type specific
chr1	162090042	162090269	0	cell-type specific
chr1	162172928	162173100	0	cell-type specific
chr1	162179950	162180092	0	cell-type specific
chr1	162239939	162240162	0	cell-type specific
chr1	162342671	162342861	0	cell-type specific
chr11	6245291	6245464	0	cell-type specific
chr1	162467772	162467995	0	cell-type specific
chr11	62522351	62522487	0	cell-type specific
chr11	62526373	62526696	0	cell-type specific
chr11	62592947	62593081	0	cell-type specific
chr11	62727449	62727664	0	cell-type specific
chr1	162779383	162779689	0	cell-type specific
chr1	162792315	162792492	0	cell-type specific
chr1	162886917	162887072	0	cell-type specific
chr11	6293653	6293916	0	cell-type specific
chr11	62954278	62954400	0	cell-type specific
chr1	162983317	162983467	0	cell-type specific
chr11	62983572	62983818	0	cell-type specific
chr1	163020455	163020609	0	cell-type specific
chr11	63206344	63206491	0	cell-type specific
chr11	63206595	63206729	0	cell-type specific
chr1	163227343	163227491	0	cell-type specific
chr1	163268832	163268974	0	cell-type specific
chr11	63275749	63275938	0	cell-type specific
chr1	163495079	163495289	0	cell-type specific
chr1	163513358	163513547	0	cell-type specific
chr1	163593363	163593528	0	cell-type specific
chr1	163608361	163608548	0	cell-type specific
chr11	63632832	63633186	0	cell-type specific
chr1	16366692	16366883	0	cell-type specific
chr1	163677973	163678154	0	cell-type specific
chr11	63697806	63697938	0	cell-type specific
chr11	6386500	6386642	0	cell-type specific
chr1	163953433	163953611	0	cell-type specific
chr11	63999285	63999444	0	cell-type specific
chr1	164061489	164061692	0	cell-type specific
chr11	64193588	64193791	0	cell-type specific
chr1	164238800	164238984	0	cell-type specific
chr11	64256512	64256666	0	cell-type specific
chr1	164257963	164258120	0	cell-type specific
chr1	164441433	164441761	0	cell-type specific
chr1	164489211	164489341	0	cell-type specific
chr11	64513513	64513658	0	cell-type specific
chr1	16459628	16459771	0	cell-type specific
chr1	164609666	164609862	0	cell-type specific
chr1	164862743	164862869	0	cell-type specific
chr1	164865271	164865407	0	cell-type specific
chr11	64937002	64937130	0	cell-type specific
chr1	165034787	165034916	0	cell-type specific
chr1	165073984	165074137	0	cell-type specific
chr1	165079942	165080075	0	cell-type specific
chr1	165143707	165143949	0	cell-type specific
chr1	165274633	165274825	0	cell-type specific
chr1	165361181	165361341	0	cell-type specific
chr1	165371704	165371871	0	cell-type specific
chr11	65394023	65394177	0	cell-type specific
chr1	165427604	165427750	0	cell-type specific
chr1	165445419	165445560	0	cell-type specific
chr1	165477312	165477441	0	cell-type specific
chr1	165490599	165490739	0	cell-type specific
chr11	65594381	65594571	0	cell-type specific
chr1	165613897	165614054	0	cell-type specific
chr11	65631776	65631910	0	cell-type specific
chr1	165734090	165734263	0	cell-type specific
chr11	65755622	65755764	0	cell-type specific
chr1	165808024	165808223	0	cell-type specific
chr11	65827532	65827702	0	cell-type specific
chr1	165949791	165949971	0	cell-type specific
chr1	165953447	165953626	0	cell-type specific
chr11	65971012	65971204	0	cell-type specific
chr11	65998096	65998222	0	cell-type specific
chr1	166014378	166014525	0	cell-type specific
chr11	66038482	66038643	0	cell-type specific
chr1	166184661	166184797	0	cell-type specific
chr11	66187789	66188076	0	cell-type specific
chr1	166338252	166338449	0	cell-type specific
chr11	66398560	66398711	0	cell-type specific
chr1	166426242	166426466	0	cell-type specific
chr1	166582352	166582514	0	cell-type specific
chr1	166613339	166613486	0	cell-type specific
chr11	66628791	66629008	0	cell-type specific
chr11	6666386	6666508	0	cell-type specific
chr1	166687165	166687351	0	cell-type specific
chr1	16675473	16675624	0	cell-type specific
chr11	66927526	66927661	0	cell-type specific
chr1	166981262	166981419	0	cell-type specific
chr1	167289435	167289741	0	cell-type specific
chr11	67425937	67426088	0	cell-type specific
chr1	167451501	167451648	0	cell-type specific
chr1	167488285	167488425	0	cell-type specific
chr1	167517720	167517872	0	cell-type specific
chr11	67603147	67603355	0	cell-type specific
chr1	167664594	167664753	0	cell-type specific
chr1	167717162	167717738	0	cell-type specific
chr1	167726977	167727183	0	cell-type specific
chr1	167769155	167769343	0	cell-type specific
chr1	167810557	167810702	0	cell-type specific
chr11	67973061	67973196	0	cell-type specific
chr1	167974679	167974851	0	cell-type specific
chr1	168119536	168119746	0	cell-type specific
chr1	168132890	168133102	0	cell-type specific
chr1	168142257	168142385	0	cell-type specific
chr1	168167111	168167269	0	cell-type specific
chr1	168181857	168182053	0	cell-type specific
chr1	168315225	168315414	0	cell-type specific
chr11	6846962	6847157	0	cell-type specific
chr11	68512564	68512703	0	cell-type specific
chr1	168522238	168522400	0	cell-type specific
chr1	168628724	168628859	0	cell-type specific
chr11	68682675	68682831	0	cell-type specific
chr11	68696105	68696245	0	cell-type specific
chr11	68712581	68712713	0	cell-type specific
chr1	168747817	168747958	0	cell-type specific
chr11	68769516	68769664	0	cell-type specific
chr11	68839324	68839497	0	cell-type specific
chr1	168859584	168859726	0	cell-type specific
chr11	68882059	68882254	0	cell-type specific
chr1	168912176	168912363	0	cell-type specific
chr1	168955025	168955240	0	cell-type specific
chr1	168978958	168979103	0	cell-type specific
chr11	68986225	68986356	0	cell-type specific
chr1	168989788	168989938	0	cell-type specific
chr1	169023319	169023463	0	cell-type specific
chr1	169065401	169065579	0	cell-type specific
chr11	69086371	69086510	0	cell-type specific
chr1	16913060	16913238	0	cell-type specific
chr1	169142916	169143056	0	cell-type specific
chr1	169151576	169151702	0	cell-type specific
chr11	69208300	69208450	0	cell-type specific
chr1	169278060	169278232	0	cell-type specific
chr11	69306326	69306560	0	cell-type specific
chr1	169323524	169323682	0	cell-type specific
chr1	169376656	169376869	0	cell-type specific
chr11	69620427	69620589	0	cell-type specific
chr1	169706782	169706968	0	cell-type specific
chr11	69741147	69741347	0	cell-type specific
chr11	69758078	69758288	0	cell-type specific
chr1	169827623	169827767	0	cell-type specific
chr11	69880756	69880925	0	cell-type specific
chr1	169949479	169949678	0	cell-type specific
chr1	169956967	169957152	0	cell-type specific
chr1	16999339	16999498	0	cell-type specific
chr1	170204472	170204700	0	cell-type specific
chr11	70298107	70298239	0	cell-type specific
chr11	70320456	70320665	0	cell-type specific
chr1	170376514	170376717	0	cell-type specific
chr1	170381984	170382130	0	cell-type specific
chr11	7043671	7043806	0	cell-type specific
chr11	7048910	7049094	0	cell-type specific
chr11	70492498	70492721	0	cell-type specific
chr1	170599759	170599916	0	cell-type specific
chr11	70646969	70647171	0	cell-type specific
chr11	70714463	70714589	0	cell-type specific
chr1	170726468	170726623	0	cell-type specific
chr11	70730681	70730837	0	cell-type specific
chr1	17077077	17077219	0	cell-type specific
chr11	70841934	70842073	0	cell-type specific
chr11	70959309	70959456	0	cell-type specific
chr1	17105669	17105838	0	cell-type specific
chr11	7116786	7117123	0	cell-type specific
chr11	71300093	71300300	0	cell-type specific
chr11	71378090	71378245	0	cell-type specific
chr11	71496095	71496278	0	cell-type specific
chr1	17161184	17161318	0	cell-type specific
chr1	171648124	171648390	0	cell-type specific
chr1	171661351	171661524	0	cell-type specific
chr11	7174812	7174937	0	cell-type specific
chr11	71778660	71778855	0	cell-type specific
chr11	7179031	7179336	0	cell-type specific
chr11	71865463	71865676	0	cell-type specific
chr1	17187911	17188046	0	cell-type specific
chr11	71902724	71902865	0	cell-type specific
chr11	71940804	71940973	0	cell-type specific
chr11	7198981	7199135	0	cell-type specific
chr11	7209259	7209422	0	cell-type specific
chr1	172125360	172125494	0	cell-type specific
chr1	172170818	172170990	0	cell-type specific
chr1	172175316	172175483	0	cell-type specific
chr1	172348288	172348478	0	cell-type specific
chr11	72370307	72370450	0	cell-type specific
chr11	72392746	72392878	0	cell-type specific
chr1	172508707	172508829	0	cell-type specific
chr1	172563539	172563765	0	cell-type specific
chr11	72630031	72630158	0	cell-type specific
chr1	172893622	172893820	0	cell-type specific
chr1	173031861	173032036	0	cell-type specific
chr11	73034627	73034752	0	cell-type specific
chr1	173107702	173107931	0	cell-type specific
chr1	173122348	173122552	0	cell-type specific
chr1	173132863	173133080	0	cell-type specific
chr1	17318076	17318213	0	cell-type specific
chr11	73245243	73245418	0	cell-type specific
chr1	173281322	173281542	0	cell-type specific
chr11	7330822	7330953	0	cell-type specific
chr1	173316547	173316696	0	cell-type specific
chr11	73420926	73421158	0	cell-type specific
chr11	7347832	7347975	0	cell-type specific
chr1	173499524	173499662	0	cell-type specific
chr11	73566464	73566632	0	cell-type specific
chr11	73606310	73606474	0	cell-type specific
chr1	173642105	173642330	0	cell-type specific
chr1	173693121	173693320	0	cell-type specific
chr11	73707697	73707837	0	cell-type specific
chr11	7375519	7375745	0	cell-type specific
chr1	17390131	17390320	0	cell-type specific
chr1	173912356	173912495	0	cell-type specific
chr1	173955121	173955290	0	cell-type specific
chr1	174028928	174029143	0	cell-type specific
chr1	174178757	174178947	0	cell-type specific
chr11	74190097	74190276	0	cell-type specific
chr1	174296127	174296268	0	cell-type specific
chr1	174331401	174331680	0	cell-type specific
chr1	174370956	174371161	0	cell-type specific
chr1	174441769	174441925	0	cell-type specific
chr1	174542545	174542668	0	cell-type specific
chr1	174594102	174594309	0	cell-type specific
chr11	74634124	74634247	0	cell-type specific
chr11	74635725	74636050	0	cell-type specific
chr11	74785886	74786051	0	cell-type specific
chr1	174861388	174861545	0	cell-type specific
chr1	174973694	174973937	0	cell-type specific
chr1	175031650	175031793	0	cell-type specific
chr11	75091456	75091612	0	cell-type specific
chr1	175255410	175255607	0	cell-type specific
chr1	175271513	175271678	0	cell-type specific
chr1	175289106	175289229	0	cell-type specific
chr11	75301655	75302047	0	cell-type specific
chr11	75329560	75329701	0	cell-type specific
chr1	175333495	175333661	0	cell-type specific
chr11	75343368	75343607	0	cell-type specific
chr1	175411337	175411511	0	cell-type specific
chr11	75469715	75469854	0	cell-type specific
chr1	175477242	175477387	0	cell-type specific
chr11	75499203	75499367	0	cell-type specific
chr11	75563242	75563375	0	cell-type specific
chr11	75567023	75567234	0	cell-type specific
chr1	17560489	17560659	0	cell-type specific
chr11	75824581	75824711	0	cell-type specific
chr11	75869528	75869675	0	cell-type specific
chr11	75935720	75935845	0	cell-type specific
chr11	75940285	75940427	0	cell-type specific
chr11	75967348	75967519	0	cell-type specific
chr11	75985466	75985614	0	cell-type specific
chr11	76035725	76035872	0	cell-type specific
chr11	76081158	76081289	0	cell-type specific
chr1	17608916	17609118	0	cell-type specific
chr1	176153999	176154174	0	cell-type specific
chr11	76256912	76257128	0	cell-type specific
chr11	76300472	76300638	0	cell-type specific
chr1	17643982	17644134	0	cell-type specific
chr1	176447961	176448156	0	cell-type specific
chr11	76470319	76470465	0	cell-type specific
chr1	176521668	176521796	0	cell-type specific
chr11	76527667	76527799	0	cell-type specific
chr1	176537980	176538215	0	cell-type specific
chr11	76551129	76551256	0	cell-type specific
chr1	176551152	176551315	0	cell-type specific
chr11	76558846	76559012	0	cell-type specific
[truncated: 35,478 more rows]

## Sheet: Peaks with ssgRNA located
ssgRNA infromation					mESC CTCF peak information
Chr	Start	End	ssgRNA sequence	Strand	Chr	Start	End	Frequency shared in cell lines	Specific/Common
chr10	109150299	109150322	ACTTGTTTACATGGTATCTG	-	chr10	109150162	109150418	5	cell-type specific
chr10	119251337	119251359	GGCGTGGGCAGGGATGTGC	+	chr10	119251294	119251531	2	cell-type specific
chr10	12303445	12303468	GTACGCACAGTGGCCAGAAG	+	chr10	12303359	12303570	4	cell-type specific
chr10	127777223	127777246	CCCTGTGTGTCTGTGACTTC	-	chr10	127777098	127777244	0	cell-type specific
chr10	21056876	21056899	GGGGCTTGCAAGTCTTACCC	-	chr10	21056853	21057336	8	cell-type specific
chr10	38772516	38772538	GGAAGGGAGGATGAGGATG	-	chr10	38772380	38772592	0	cell-type specific
chr10	42892759	42892782	GGCTTGTTTTTCGCGTTTCT	-	chr10	42892743	42892905	0	cell-type specific
chr10	5461316	5461338	CTGTGTGTGTGTCTGTGGG	+	chr10	5461216	5461388	0	cell-type specific
chr10	58841656	58841679	GTGCCTAAGGTAGCCAGAAG	+	chr10	58841364	58841771	9	cell-type specific
chr10	61439970	61439993	TGGGCTGTAGCAGCAAGCGT	+	chr10	61439937	61440092	6	cell-type specific
chr10	65164096	65164118	ATATGCCAGTAGAGGGCAT	-	chr10	65164059	65164242	1	cell-type specific
chr10	66675398	66675421	CACCTGAGAGACAGAGGCAG	-	chr10	66675312	66675466	1	cell-type specific
chr10	6894322	6894345	GGTCAGAACAAGGGAGTGAA	-	chr10	6894212	6894377	0	cell-type specific
chr10	70891404	70891427	GTGCCTCCGGAGGCCAGAAG	+	chr10	70891295	70891574	2	cell-type specific
chr10	75281613	75281636	GGGGCACAGGGATGGATGGA	+	chr10	75281349	75281756	5	cell-type specific
chr10	77187746	77187769	GGGAGGCACAGCTTTGTTGG	-	chr10	77187590	77187863	7	cell-type specific
chr10	77913624	77913647	AGGGTCTCACTTTAAAGCTC	+	chr10	77913600	77913964	2	cell-type specific
chr10	79205119	79205142	CTTGTCTCACTGTGTAGCCC	+	chr10	79205137	79205334	0	cell-type specific
chr10	84501762	84501785	GGAACAGTTGGTAGTTGGGA	+	chr10	84501769	84501967	5	cell-type specific
chr10	87499314	87499337	GGGGCACTTGTCCTAATTGT	-	chr10	87499215	87499348	0	cell-type specific
chr10	88132630	88132653	GTGGGCTAAAGAGAGAGAGT	+	chr10	88132460	88132849	9	cell-type specific
chr10	88270765	88270787	GCTCGGGAGGAACGCATTC	+	chr10	88270752	88270918	0	cell-type specific
chr10	88668662	88668685	GTCTCTTACAGTGTTGTATC	-	chr10	88668478	88668941	8	cell-type specific
chr10	90604445	90604468	AGGCAATGTCTGGTTACTGT	-	chr10	90604307	90604538	8	cell-type specific
chr10	95174848	95174871	GACCTAGGAGCTCGCTGTGT	-	chr10	95174747	95174887	0	cell-type specific
chr1	107422110	107422133	GTTGCTTCTGGTCTCCTGGT	-	chr1	107421909	107422116	0	cell-type specific
chr11	100082379	100082401	CTCCACACAGACCAGAAGA	+	chr11	100082369	100082536	3	cell-type specific
chr11	100569412	100569435	GGTCGCTACAAGAAGGGCTG	+	chr11	100569400	100569542	1	cell-type specific
chr11	101208641	101208664	GTTGCCCTTGCAGAGAACCC	-	chr11	101208502	101208740	7	cell-type specific
chr11	104059713	104059736	GGGGGATCGGGATGGAGATG	-	chr11	104059611	104059770	0	cell-type specific
chr11	104208446	104208469	CTGATGAGAGTGCCACCTGG	-	chr11	104208251	104208766	5	cell-type specific
chr11	105046224	105046247	GTCAGTTCCCAGGACCCACA	-	chr11	105045946	105046313	9	cell-type specific
chr11	107112955	107112978	AAAGAGGGCGCCAGATCCCC	-	chr11	107112632	107113091	6	cell-type specific
chr11	110219238	110219261	CTCTGCAATTCCAGTTCCAG	+	chr11	110219126	110219513	9	cell-type specific
chr11	111928613	111928635	GCAGGGTTGGGTGGGCAGT	+	chr11	111928570	111928775	8	cell-type specific
chr11	116362912	116362935	GAGTACTGGAGACTGAACCT	+	chr11	116362667	116363013	7	cell-type specific
chr11	117263072	117263093	GCCTGTATGTGTGCCTGC	+	chr11	117262985	117263282	5	cell-type specific
chr11	118502338	118502361	TGGGGAGTAGCCATATTGAG	+	chr11	118501924	118502342	8	cell-type specific
chr1	111882293	111882315	GGAGGGGGCAGTGATCAAG	-	chr1	111882181	111882435	3	cell-type specific
chr11	120070344	120070367	ATCTGCTGCCCTCTTCTGGC	+	chr11	120070121	120070533	7	cell-type specific
chr11	121127554	121127577	GTCAAAAGGGGCAGGCAGGT	+	chr11	121127430	121127807	0	cell-type specific
chr11	12214872	12214895	CTCCCTCTGCTGTTGGTCTG	-	chr11	12214703	12214985	9	cell-type specific
chr11	14690001	14690024	CTTGGCATAGTGAGAGGACA	-	chr11	14689922	14690177	0	cell-type specific
chr11	16245172	16245195	TGAGTTGTGGCATCGGAAAG	+	chr11	16245117	16245318	0	cell-type specific
chr1	120971711	120971734	CAGGGACTTCCTGGAAGGAG	-	chr1	120971432	120971859	5	cell-type specific
chr1	121332387	121332409	CCCTCCACCTCCCGAGTGC	+	chr1	121332051	121332450	1	cell-type specific
chr1	122264838	122264860	TATGTGTATGTCTCTGTGT	+	chr1	122264565	122265291	4	cell-type specific
chr1	123800768	123800791	GTGCTTATGAAGGCCAGAAG	+	chr1	123800661	123800910	1	cell-type specific
chr1	123904488	123904511	TGTGAATGTAGTACCCGAAG	+	chr1	123904395	123904678	4	cell-type specific
chr1	128393480	128393503	GTACCTAAGGTGGCCAGAAG	+	chr1	128393316	128393637	6	cell-type specific
chr1	129176976	129176999	CTCATGTGTACATGGCCACA	-	chr1	129176918	129177256	9	cell-type specific
chr11	29449360	29449383	GGTACATGTGTGGAGACAGG	-	chr11	29449245	29449398	2	cell-type specific
chr1	130461875	130461898	GTGAGTTTGTGTGTATGTGC	+	chr1	130461840	130461998	0	cell-type specific
chr1	13128574	13128597	GAGCCTCCTGACCTGAGTGC	+	chr1	13128414	13128657	6	cell-type specific
chr1	13133114	13133137	GGTGGGTTTCTGACACGGGA	+	chr1	13132729	13133281	8	cell-type specific
chr11	32002611	32002634	CATCAACGCAAACAAGAGGT	-	chr11	32002506	32002655	0	cell-type specific
chr1	133515341	133515363	GCCCCAGGAGGCCAGAAGG	-	chr1	133515079	133515400	8	cell-type specific
chr1	133598211	133598234	CAGTAACTGAGCTGCCATGT	+	chr1	133598030	133598227	4	cell-type specific
chr1	133891821	133891844	GTGCACATGAGGGCCAGAAG	+	chr1	133891621	133891941	9	cell-type specific
chr1	133951817	133951839	GCCTGGGCAGGGACACCTG	-	chr1	133951656	133951857	0	cell-type specific
chr1	134059394	134059417	GTTGTGAGTCACCACGTGGT	+	chr1	134059335	134059646	4	cell-type specific
chr1	134059397	134059420	GTGAGTCACCACGTGGTTGG	+	chr1	134059335	134059646	4	cell-type specific
chr1	134059398	134059421	TGAGTCACCACGTGGTTGGT	+	chr1	134059335	134059646	4	cell-type specific
chr1	134574877	134574900	GACCTCTGGGGGGCGCTGCT	-	chr1	134574686	134575057	9	cell-type specific
chr1	134699187	134699211	CATCGCTCCACTCTGAGGAGG	-	chr1	134699031	134699362	6	cell-type specific
chr1	135022410	135022432	GCCTGAGGGGGCCAGAATG	-	chr1	135022226	135022541	7	cell-type specific
chr1	135801257	135801279	GTTATACATGTGCATGTTC	-	chr1	135801192	135801387	0	cell-type specific
chr1	136051118	136051141	AGCACTTGAGAGGTTGAGGT	-	chr1	136051076	136051567	4	cell-type specific
chr1	136178349	136178372	GTCGGTAACTCCAGCTCCAG	-	chr1	136178153	136178489	8	cell-type specific
chr1	137158365	137158388	GTGAAGGCAAGGGAAGGAAG	+	chr1	137158206	137158390	2	cell-type specific
chr1	138017207	138017230	GTGTGATTAGAAGAACTGAG	-	chr1	138017146	138017279	0	cell-type specific
chr1	138056672	138056695	GGGGCTCCAGGAGCTGGCTG	+	chr1	138056342	138056699	4	cell-type specific
chr1	138670559	138670582	GTGAGCTTCCGTGTGAGTGC	+	chr1	138670303	138670851	6	cell-type specific
chr1	138752861	138752884	ATGCTCACAGGGCCCAGAAG	+	chr1	138752637	138753006	5	cell-type specific
chr1	140016809	140016832	GTATGACACAAAGGTGCCAC	+	chr1	140016569	140016876	4	cell-type specific
chr11	4137120	4137143	GAGAGACCATGCCGGGGACC	+	chr11	4137039	4137539	2	cell-type specific
chr11	4137471	4137494	GGGGGTGTGCCCGTAGACCT	-	chr11	4137039	4137539	2	cell-type specific
chr1	141912958	141912981	CATGATCCTTCATGGGTCCA	-	chr1	141912764	141912966	0	cell-type specific
chr1	146026918	146026941	GGGTGGGAGCCGCCAGATGT	+	chr1	146026720	146027021	3	cell-type specific
chr11	48590278	48590301	CTGCAGGCTGGCCTTGGACT	+	chr11	48590233	48590446	9	cell-type specific
chr11	50416796	50416819	CGTGGGACACCAAGCGGCCC	-	chr11	50416634	50416925	1	cell-type specific
chr11	50487205	50487228	GAGAGGAGGTACAGTGGGGA	+	chr11	50487084	50487361	8	cell-type specific
chr11	5056618	5056641	GGGAGACGGAGAGGAGGAGG	+	chr11	5056579	5056862	0	cell-type specific
chr11	52177408	52177431	CTAGCACATGTGGAGGTCAG	+	chr11	52177318	52177534	0	cell-type specific
chr1	152246365	152246388	AGCATGTTCTTGGGTGAAGT	+	chr1	152246365	152246524	0	cell-type specific
chr1	152479758	152479782	CTTGTGTGTGTGTATTTGTGT	+	chr1	152479669	152479934	9	cell-type specific
chr11	52825757	52825780	GCTGCTCTTGCAGATGACGT	-	chr11	52825521	52825871	3	cell-type specific
chr1	154369584	154369607	GTGGGTGTGTGTCTGTGTGT	-	chr1	154369449	154369589	0	cell-type specific
chr11	55133648	55133671	AAAGCCACCTGACCTGTCGT	+	chr11	55133632	55133788	0	cell-type specific
chr11	55164591	55164614	AGACAGGGATGGAGAGAGAG	-	chr11	55164403	55164604	0	cell-type specific
chr1	155965343	155965366	GTGAGGAGGATGCTGCCCCC	+	chr1	155965075	155965495	9	cell-type specific
chr11	57538818	57538842	TGGGTCCTAGCACTCACATGG	-	chr11	57538420	57538883	9	cell-type specific
chr1	158171485	158171508	TGGGGAATAGGGGTGGAAGG	-	chr1	158171282	158171638	8	cell-type specific
chr1	158526274	158526295	GGTCAGAGGTGGTGGTGG	+	chr1	158526178	158526384	0	cell-type specific
chr1	158570861	158570884	GGGCAACTACCTGGGAGCCA	-	chr1	158570832	158571042	8	cell-type specific
chr11	58731352	58731375	AGGGAAGGCACGGAGATGAG	-	chr11	58731207	58731400	0	cell-type specific
chr11	58915800	58915823	GTAGATGAACAGGGGAGACA	+	chr11	58915797	58916114	9	cell-type specific
chr1	160028484	160028506	TGGGGGGCAAAGGAGATAG	+	chr1	160028384	160028686	0	cell-type specific
chr11	60288131	60288154	GGGGTGCTGGTGAGATGGCT	-	chr11	60287957	60288156	2	cell-type specific
chr1	160774884	160774907	AGGCCTCAGTGAAGAACTGC	-	chr1	160774586	160775150	7	cell-type specific
chr1	162864452	162864475	GGGTTACTTTGGGCCACTAG	-	chr1	162863933	162864697	4	cell-type specific
chr1	164441448	164441471	GCGGGGTGTGAGGAAAGAGG	-	chr1	164441433	164441761	0	cell-type specific
chr11	66712241	66712264	GGGCAAGGTAGGCATATGCT	-	chr11	66712225	66712528	2	cell-type specific
chr11	67245574	67245597	CGAGAGGGTGTCAGGACCCC	-	chr11	67245479	67245784	9	cell-type specific
chr1	168132936	168132957	GGTGTGTGTGTGGTGAGG	-	chr1	168132890	168133102	0	cell-type specific
chr11	68542353	68542376	GCGTCCGATCCCATTACAGG	-	chr11	68542017	68542436	2	cell-type specific
chr1	168912225	168912249	TGGAGATGGTGATGGTGGTGA	+	chr1	168912176	168912363	0	cell-type specific
chr11	69344499	69344522	TGTGAGCCAGCTGGGCGTGG	+	chr11	69344379	69344557	7	cell-type specific
chr11	69808049	69808073	GTTCCATTCTACGAAGAGAGG	+	chr11	69807996	69808231	2	cell-type specific
chr1	169819241	169819264	GAGCCCATTGACTGTGTGGT	+	chr1	169819114	169819314	4	cell-type specific
chr11	7179121	7179143	AGGCAGGGGTGTGGGCAGG	+	chr11	7179031	7179336	0	cell-type specific
chr11	72261315	72261338	CGTGACAAAGATGTGGACCC	+	chr11	72260919	72261319	6	cell-type specific
chr1	173289005	173289028	GACCAGCTTTATTTGGTTGG	-	chr1	173288660	173289051	9	cell-type specific
chr11	76128418	76128441	GCTGACCCCTGCTGGTTGGC	-	chr11	76128354	76128586	8	cell-type specific
chr1	178023058	178023079	GTATGGTGGTGTGTGTGT	+	chr1	178023063	178023502	0	cell-type specific
chr1	178261703	178261726	GATTGTGATCTGCCCAGTGT	+	chr1	178261371	178261804	5	cell-type specific
chr11	79240033	79240056	CCCTCTTCTTTTTCAGTTCC	-	chr11	79239982	79240148	0	cell-type specific
chr11	80238922	80238944	ACTTTCAGCAACCACATGG	-	chr11	80238823	80239307	2	cell-type specific
chr11	81145578	81145600	CTCGAGTACTGTTAGTGAT	+	chr11	81145507	81145952	5	cell-type specific
chr1	181432843	181432866	ATTAACTGAGCCTGGCATGG	-	chr1	181432500	181433036	9	cell-type specific
chr11	81485469	81485492	TGGCAGGTGAAGGGAGGGGC	-	chr11	81485160	81485509	3	cell-type specific
chr1	182404585	182404609	ACCACCTGTAACTCCAGTCAC	+	chr1	182404501	182404705	4	cell-type specific
chr1	182807820	182807842	GCCAGGTGTGTGCCGCTGT	+	chr1	182807702	182807920	3	cell-type specific
chr1	184725225	184725248	GGTGGAAAACAGCGTAGATG	-	chr1	184725123	184725280	0	cell-type specific
chr1	185356770	185356793	GTGACTATGGGGGCCAGAAG	+	chr1	185356657	185356894	1	cell-type specific
chr1	185678273	185678296	GTGGCAGGCTGGGGGCCAGG	+	chr1	185678183	185678415	7	cell-type specific
chr11	86650449	86650472	CAAGGTGGAGGCAGGGGCAT	+	chr11	86650417	86650738	1	cell-type specific
chr11	86719985	86720008	AACTGCCCTGTGTAGATGCC	+	chr11	86719889	86720475	7	cell-type specific
chr1	187011409	187011432	GTGACATTCTCTGTTGCATG	-	chr1	187011284	187011635	8	cell-type specific
chr11	87851033	87851056	GAGGGATGTTCTGAGACAGG	-	chr11	87851005	87851215	0	cell-type specific
chr11	88208580	88208602	CTTGATGGTCCTGCCTGCC	+	chr11	88208578	88208728	0	cell-type specific
chr1	190881503	190881526	TACCCATAGACGCCAGAAGG	-	chr1	190881367	190881598	9	cell-type specific
chr11	9149837	9149860	TGCACTGCTTGCTGTTTTGG	+	chr11	9149712	9149941	9	cell-type specific
chr1	193749617	193749640	GTCCTTCTGAGGGTTACTCA	+	chr1	193749440	193749738	4	cell-type specific
chr1	194696088	194696110	CTGGAGGATGTGTGCCACT	+	chr1	194695798	194696323	1	cell-type specific
chr1	194696092	194696116	AGGATGTGTGCCACTAGGGGC	+	chr1	194695798	194696323	1	cell-type specific
chr11	95167112	95167135	AGCGCCCTCTTCTGGCCTGC	+	chr11	95166930	95167342	9	cell-type specific
chr11	96146303	96146326	AGCGGGGAGAGGGGGTTGCG	-	chr11	96146139	96146324	1	cell-type specific
chr11	96146311	96146334	GGGAGGGCAGCGGGGAGAGG	-	chr11	96146139	96146324	1	cell-type specific
chr1	197053093	197053116	AGTGTGACAGGGTTAGGGGT	+	chr1	197052901	197053281	0	cell-type specific
chr1	197067815	197067838	GGCGCGTGAGCGATCTGTAT	-	chr1	197067667	197067999	0	cell-type specific
chr1	197067841	197067865	GGAGTGAGTGAGTGAATGTGG	-	chr1	197067667	197067999	0	cell-type specific
chr11	97175636	97175659	TGCGTCACCATGTGGATGCT	+	chr11	97175478	97175693	6	cell-type specific
chr11	98595578	98595601	GGGTGCTAGGCACTGAACCT	+	chr11	98595401	98595662	9	cell-type specific
chr12	103502262	103502285	GAAGGCATTAGGCTGAGTCC	-	chr12	103502171	103502323	0	cell-type specific
chr12	107165556	107165579	GACAGTTGTGCGCTGCCATG	-	chr12	107165469	107165736	3	cell-type specific
chr12	111551125	111551148	GAGACGGGAGAGAGAATCTC	+	chr12	111550757	111551134	0	cell-type specific
chr12	112608871	112608894	GCTTCTTAGAAGTGGCCAGG	-	chr12	112608525	112608987	7	cell-type specific
chr12	115734143	115734166	AGGTATCCATGACCAGCAGG	-	chr12	115734083	115734230	1	cell-type specific
chr12	13205976	13205999	CTGTGGGGTAAATTGGACAT	-	chr12	13205871	13205998	0	cell-type specific
chr1	21334702	21334725	CGGGGGAGTCCTCATGTTGT	-	chr1	21334301	21335010	9	cell-type specific
chr12	18142338	18142361	TGGTGGGATTGGGGAGCAAA	+	chr12	18141871	18142482	1	cell-type specific
chr12	20821973	20821997	AGGGGTTCTGAGGCTAATGGT	-	chr12	20821885	20822237	1	cell-type specific
chr12	25382615	25382638	GGGTGCTAGTGAGAGGTTCC	-	chr12	25382514	25382760	6	cell-type specific
chr12	28866337	28866360	CTGCCCTCTAGAGCATGATG	+	chr12	28866339	28866566	3	cell-type specific
chr12	34119806	34119829	GGGTATCTGAGGCCCTCTTC	-	chr12	34119639	34119949	7	cell-type specific
chr12	3560759	3560782	GTTTTCAAGCCTGCCACAGG	-	chr12	3560469	3560921	7	cell-type specific
chr12	38237649	38237672	GTGAAAGATCGAGTGACCAT	+	chr12	38237660	38237811	0	cell-type specific
chr12	39437735	39437758	TGGGGCAGGAGGGAATGATT	+	chr12	39437624	39437869	0	cell-type specific
chr12	4392790	4392813	GAAAGCTGCCATGTGGGTGG	-	chr12	4392648	4392972	6	cell-type specific
chr12	46288766	46288789	TGGGAGATGGCAGATGACGT	+	chr12	46288572	46288878	0	cell-type specific
chr12	50486373	50486396	CAGGGACAGGAAGGGCGACA	-	chr12	50486181	50486501	1	cell-type specific
chr12	50486386	50486409	CGCGGGGGTGGTGCAGGGAC	-	chr12	50486181	50486501	1	cell-type specific
chr12	55859741	55859764	GTCAGGTAATTGGGAGTCAC	-	chr12	55859527	55859835	0	cell-type specific
chr12	57790915	57790938	TGGCGCTGCGATGAGGTGCC	+	chr12	57790764	57791129	7	cell-type specific
chr12	72678546	72678569	ACAGGTTTCAGGCCGAGGGT	+	chr12	72678357	72678801	7	cell-type specific
chr12	77111877	77111899	AAGCCTGCAACCTAGCACT	-	chr12	77111652	77111897	0	cell-type specific
chr12	77474073	77474096	AGGTCAGAAGGCTGGGGTGG	-	chr12	77473946	77474322	7	cell-type specific
chr12	80423655	80423677	TGAGAAGCCGGGGGTGTGG	-	chr12	80423392	80423912	6	cell-type specific
chr12	81253086	81253108	CAGTTCTTGTAGAGGACCC	-	chr12	81252729	81253270	9	cell-type specific
chr12	83190558	83190581	GCCACTTGCTGTTCTTGCAG	-	chr12	83190369	83190605	8	cell-type specific
chr12	86545269	86545292	GTGCTGAATGCTTGGTCCCC	-	chr12	86545023	86545435	8	cell-type specific
chr13	101459752	101459774	GTGAGCAGGGACTGAGCAA	-	chr13	101459685	101459887	1	cell-type specific
chr13	101474004	101474027	CCGGCACTCAGGTGGCTGTC	-	chr13	101473597	101474234	5	cell-type specific
chr13	101622527	101622550	GGTTAACAAGCACATTTCCG	-	chr13	101622380	101622537	0	cell-type specific
chr13	105005538	105005560	GTAGCAGTAGGCTGAGCAC	+	chr13	105005552	105005744	0	cell-type specific
chr13	112203618	112203641	ATTTGTTGTCATGTCAGAAA	+	chr13	112203393	112203727	9	cell-type specific
chr13	114918744	114918767	TAGACACCAGGAGAGGGCAT	+	chr13	114918287	114918961	2	cell-type specific
chr13	115777427	115777449	CTGGGGCTGGGGAGGTGGT	+	chr13	115777419	115777801	5	cell-type specific
chr13	11855481	11855504	CCCACAGAGCAGGAAAGAGT	+	chr13	11855402	11855672	8	cell-type specific
chr13	12020177	12020200	GGCCTGTGGAGTCCAGAAGA	-	chr13	12020028	12020346	7	cell-type specific
chr13	12020178	12020200	GGCCTGTGGAGTCCAGAAG	-	chr13	12020028	12020346	7	cell-type specific
chr13	20355234	20355256	AAGGCCAGGAGAGGGCAGT	-	chr13	20355140	20355338	6	cell-type specific
chr13	21357740	21357763	GCAGTGTGTCACTGTGGTGG	+	chr13	21357582	21357997	2	cell-type specific
chr13	21357741	21357764	CAGTGTGTCACTGTGGTGGT	+	chr13	21357582	21357997	2	cell-type specific
chr13	21357747	21357770	GTCACTGTGGTGGTGGGCTC	+	chr13	21357582	21357997	2	cell-type specific
chr13	21357813	21357834	CCTCAGGTAGCCAGGAGG	-	chr13	21357582	21357997	2	cell-type specific
chr13	21357813	21357836	ATCCTCAGGTAGCCAGGAGG	-	chr13	21357582	21357997	2	cell-type specific
chr13	21357816	21357838	GCATCCTCAGGTAGCCAGG	-	chr13	21357582	21357997	2	cell-type specific
chr13	21357816	21357839	GGCATCCTCAGGTAGCCAGG	-	chr13	21357582	21357997	2	cell-type specific
chr13	22122361	22122384	GAAGGGAATAGGGAAAGAGT	+	chr13	22122303	22122497	5	cell-type specific
chr13	30288078	30288101	GTGGGGTGATGCTGGGACAT	+	chr13	30288049	30288274	0	cell-type specific
chr13	33854838	33854861	AGCCAGTAGATGGCACTCGA	-	chr13	33854661	33854918	9	cell-type specific
chr1	34004882	34004905	GGCAGGCCTGGGCAGGGTGA	+	chr1	34004716	34005062	2	cell-type specific
chr1	34068050	34068072	GCCAGGGTCAGGGCAGCTG	-	chr1	34067862	34068318	8	cell-type specific
chr1	34125566	34125589	TCCCGGGAGCATCAAGGGCA	-	chr1	34125196	34125664	9	cell-type specific
chr13	4280954	4280977	ATGCATGTGGTTAACAGACA	+	chr13	4280798	4281159	5	cell-type specific
chr13	47174223	47174246	CTCACATGGAAGCGATGGGA	+	chr13	47174220	47174572	6	cell-type specific
chr13	47971369	47971392	CTCCCATGGTGTTTCAGGGC	-	chr13	47971258	47971434	0	cell-type specific
chr13	50127380	50127403	GGACATTGAGTGACACAGGC	-	chr13	50127015	50127533	8	cell-type specific
chr13	55283941	55283964	GGGGCCTTGAAAGCGTACGA	+	chr13	55283819	55284079	6	cell-type specific
chr13	55609361	55609383	CTGGGGTTAGCCTGTGCTG	-	chr13	55609233	55609580	2	cell-type specific
chr13	56381790	56381813	AGGGGCTCGAGAGATGGTTC	+	chr13	56381712	56382000	7	cell-type specific
chr13	57651213	57651236	GTCATGCTGCATGGATCTGC	+	chr13	57651081	57651632	5	cell-type specific
chr1	35772899	35772922	GGTGGAGATGAGTGCGAATG	-	chr1	35772709	35773230	7	cell-type specific
chr13	58146792	58146815	GTGGTCGTGAGCTGCCGCGT	-	chr13	58146695	58147109	8	cell-type specific
chr13	58169243	58169266	ATTTGCTGGCCATGTGACCG	+	chr13	58169063	58169524	8	cell-type specific
chr13	58250201	58250224	GAACGAACAGGGATGATCCT	+	chr13	58250201	58250550	9	cell-type specific
chr13	59382744	59382767	GTTCCCATGGAGGCCAGTAG	-	chr13	59382549	59382881	7	cell-type specific
chr13	59453038	59453061	CATGCATGCAGTGCCTAAGG	-	chr13	59452935	59453126	7	cell-type specific
chr13	59571775	59571798	CAGGCCATGGCACGACAAAT	+	chr13	59571602	59571781	0	cell-type specific
chr1	37859331	37859353	GTTGGCAGCTGAGGCCAGC	-	chr1	37859185	37859467	5	cell-type specific
chr13	84503884	84503907	CCAAAGTTGAGAGGGAGGCA	-	chr13	84503738	84503916	3	cell-type specific
chr13	94073785	94073808	CTCGGCTCCTGCGCTGGCTC	-	chr13	94073691	94073859	8	cell-type specific
chr1	39841393	39841416	GGATGTCTTGCCTGTGATCA	-	chr1	39841242	39841401	0	cell-type specific
chr1	40350824	40350847	TGGGGCTGCAGGGATGGCTC	+	chr1	40350822	40351222	9	cell-type specific
chr1	40350963	40350986	GCACACGAGGACAGTACCAA	-	chr1	40350822	40351222	9	cell-type specific
chr14	11906574	11906597	CTTGTAAGCAGCATAATGTT	-	chr14	11906392	11906584	0	cell-type specific
chr14	119520307	119520330	CATGGGCACCTGCACACACA	+	chr14	119520141	119520394	1	cell-type specific
chr14	122852870	122852893	CTGGGGTGAGAGCTAGAGTG	+	chr14	122852489	122853040	3	cell-type specific
chr14	123770946	123770969	CGCTGGGTGATGTGCATGGT	-	chr14	123770790	123771055	8	cell-type specific
chr14	124810311	124810334	GAGGGCTTGTGGTGTTCTCC	+	chr14	124810112	124810463	7	cell-type specific
chr14	125108813	125108836	AGACCTGCCCAGCAGATTCT	+	chr14	125108699	125108906	0	cell-type specific
chr14	25766798	25766822	GAGGACTCGGGTTCAGTTCCC	-	chr14	25766674	25766855	4	cell-type specific
chr14	26228236	26228259	GTTGGTGGCAGCAGTGGTGG	-	chr14	26228244	26228394	0	cell-type specific
chr14	27122673	27122696	CACAGGCATACAATGACTGT	+	chr14	27122652	27122900	8	cell-type specific
chr14	27495104	27495127	AGGCTTTCCGTGCTACTGCC	-	chr14	27494821	27495430	7	cell-type specific
chr1	42913394	42913418	GTCGTCTGTAACTCCAGCCCC	+	chr1	42912925	42913502	1	cell-type specific
chr14	32138237	32138260	CGGCTGTAATTCCAGATCCA	-	chr14	32137855	32138392	9	cell-type specific
chr14	37871610	37871632	GTGGCTGTGGGCCTCCATG	+	chr14	37871259	37871756	7	cell-type specific
chr14	46387015	46387038	GGAGAAAGAGCGTTGGCTTC	-	chr14	46386952	46387289	0	cell-type specific
chr14	47894487	47894510	GTGATGGTGATGTGAGGATG	-	chr14	47894284	47894507	0	cell-type specific
chr14	55796554	55796577	GGGGAGGAGGAGGTAAAGGA	+	chr14	55796540	55796699	0	cell-type specific
chr14	56199545	56199568	GTGGAGAGCTGGGGAAGCTC	-	chr14	56199489	56199637	0	cell-type specific
chr14	56444154	56444177	GTCCTAACTGGGGTGGGAGT	+	chr14	56443980	56444297	2	cell-type specific
chr14	56461706	56461729	AGGCTCAGGGGCTGGTGAGA	+	chr14	56461705	56461835	3	cell-type specific
chr14	57232933	57232955	CCCTGAGCAGGCCAGAAGT	-	chr14	57232735	57233091	5	cell-type specific
chr14	61070689	61070712	GTCCCCGGAGCTGGAGTTGC	-	chr14	61070445	61070926	7	cell-type specific
chr14	63123469	63123492	GTGGTTTGGAGCTGCCACGT	-	chr14	63123360	63123612	1	cell-type specific
chr14	64495815	64495837	GCTAGTGTTGGCTTCGGGT	+	chr14	64495678	64495820	0	cell-type specific
chr14	66129195	66129218	GATTGTAAGCTGCCTAATGT	-	chr14	66129147	66129326	2	cell-type specific
chr14	67591529	67591552	GTACCAGTAGAGGCCAGGAG	-	chr14	67591351	67591722	6	cell-type specific
chr1	46971473	46971496	CAACCATCTACAGTGGGATC	+	chr1	46971203	46971627	6	cell-type specific
chr1	46971498	46971522	ATATGCCTACAGACCAGAAGA	-	chr1	46971203	46971627	6	cell-type specific
chr14	90009465	90009488	CTTGGGTTCGCGGCTGTCCC	-	chr14	90009352	90009530	0	cell-type specific
chr1	5008086	5008109	GGTTTCTGTCCTGAGAGTGC	-	chr1	5008079	5008390	3	cell-type specific
chr1	50982922	50982945	GTCAAGATTCAGGAGGTTAT	+	chr1	50982837	50983010	0	cell-type specific
chr15	11821349	11821372	GTGTGCTTAGTGCCCACAGG	-	chr15	11821247	11821451	9	cell-type specific
chr15	23416266	23416289	CTTACATTGCCTGGATGGCT	+	chr15	23416171	23416385	5	cell-type specific
chr15	27789647	27789670	AGCAACCAGAGGCATGGCCA	+	chr15	27789416	27789762	5	cell-type specific
chr15	29173029	29173052	AGGGGCCTAGGACTCAGAGG	+	chr15	29173032	29173232	0	cell-type specific
chr15	34368568	34368591	CTCACAAGATGGGGCCTGGG	+	chr15	34368217	34368603	7	cell-type specific
chr15	39998407	39998430	GTGGCCATATCTTGAATAGC	-	chr15	39998227	39998481	8	cell-type specific
chr1	54332520	54332543	GGGGAGTGTTGATTGGGTTT	-	chr1	54332416	54332885	2	cell-type specific
chr15	4420999	4421021	TAGGCCAAGGTGATCTGAT	+	chr15	4420963	4421152	0	cell-type specific
chr1	55099376	55099399	CATAGTTGTCACTGGTGGAT	-	chr1	55099217	55099520	6	cell-type specific
chr1	55504639	55504662	GGTTCTTCCTGGATCGGATT	+	chr1	55504354	55504865	7	cell-type specific
chr15	59126272	59126295	GGTTTGCAGAGTGTTTACTT	-	chr15	59126152	59126300	0	cell-type specific
chr1	55962228	55962251	GTGTGTGCGTGTCTGTGTGT	+	chr1	55962142	55962505	2	cell-type specific
chr15	6336758	6336781	CTCTCCAGGAATGTGGCGGC	-	chr15	6336378	6336796	9	cell-type specific
chr15	6516047	6516071	GAAGAGGGCACCACAATCCAC	+	chr15	6515933	6516189	8	cell-type specific
chr15	73384700	73384723	GCCTGTGTGTTGAGGGCAAG	+	chr15	73384533	73384843	4	cell-type specific
chr15	74149387	74149410	TGTGGGCTTAGGGACAGAGG	-	chr15	74149155	74149448	0	cell-type specific
chr15	74630340	74630363	CAATGAGACGCGGAGGCTGC	-	chr15	74630189	74630489	7	cell-type specific
chr15	74630420	74630443	CTATCGTGGGGTCAGGCAGA	-	chr15	74630189	74630489	7	cell-type specific
chr15	76078059	76078082	CCTCTAGCTCGACCTGGGGT	-	chr15	76077905	76078508	9	cell-type specific
chr15	78294550	78294573	ATAGATGGCAGATAGATAGG	+	chr15	78294345	78294744	0	cell-type specific
chr15	78294568	78294591	GGTGGATTGTGATGGACAAT	+	chr15	78294345	78294744	0	cell-type specific
chr15	79303630	79303653	ACTGCCTGTGATTCCAGCCC	+	chr15	79303442	79303712	8	cell-type specific
chr15	81029061	81029084	GTCCAGAAGAGGGCGTCAGG	-	chr15	81029043	81029321	9	cell-type specific
chr15	82012923	82012945	CCTAGTGGAGGCCAGAAGA	+	chr15	82012755	82013102	9	cell-type specific
chr15	82012946	82012969	GCCAGATCCCCTGGAACTGG	+	chr15	82012755	82013102	9	cell-type specific
chr1	58617550	58617572	GGCCATCCAAGCAGTGACA	+	chr1	58617493	58617771	0	cell-type specific
chr15	87019468	87019491	GTCCCTGTGTAGCAGCAGCA	+	chr15	87019351	87019699	7	cell-type specific
chr15	88733831	88733854	CTCTGGAACAGAATGGGAGT	-	chr15	88733626	88733849	3	cell-type specific
chr15	88940820	88940843	CTCTGTCTCAGTCTGACGCG	-	chr15	88940674	88940929	7	cell-type specific
chr1	59343388	59343411	GGAAACGTGAGTGGGCGGTA	+	chr1	59343359	59343657	9	cell-type specific
chr15	96227634	96227657	GCTGCTCTTCCAGGCGACCT	-	chr15	96227442	96227858	2	cell-type specific
chr1	59660854	59660877	GTGGCACCATCCCTGGCTGA	+	chr1	59660699	59661144	8	cell-type specific
chr1	59667978	59668001	GTACCTTTGGTGGCCAGAAG	-	chr1	59667843	59668026	5	cell-type specific
chr15	97366745	97366767	TGGGCTGCCATGTGGGCGT	-	chr15	97366648	97366863	5	cell-type specific
chr15	97927573	97927596	AGTGATCTGGCGCCCTCTTC	+	chr15	97927490	97927695	9	cell-type specific
chr1	60253846	60253868	CAGACAGCGCCTCAAGTGG	-	chr1	60253425	60254095	4	cell-type specific
chr1	61015451	61015474	GTCAGGGTCTTATGCATTCC	+	chr1	61015252	61015492	6	cell-type specific
chr16	11784585	11784607	GGGGGATGGGGATTGGGGA	+	chr16	11784584	11784751	2	cell-type specific
chr16	13531621	13531644	CCTGTCCTTAGAGGCATTGC	-	chr16	13531474	13531675	9	cell-type specific
chr16	13830787	13830810	CGGGGCTGGAGACGTGGCTC	-	chr16	13830500	13830908	6	cell-type specific
chr16	15107531	15107555	GTCTGTGTGCAGTGCCTGTGA	-	chr16	15107380	15107566	3	cell-type specific
chr16	21350175	21350198	GTGTCTGGTTGAGGTGCCAC	+	chr16	21349997	21350404	5	cell-type specific
chr16	21392136	21392159	GGTGTCGTAGTTTCTGGGTA	+	chr16	21392134	21392558	9	cell-type specific
chr16	22953436	22953459	CAACAACAACAACAAGGGAC	+	chr16	22953056	22953545	5	cell-type specific
chr16	26993933	26993956	GAGGATGGGTAAGGAAATTA	-	chr16	26993750	26993993	0	cell-type specific
chr16	28770545	28770568	TACCTGTGGAGGCCTGAAGA	-	chr16	28770426	28770660	4	cell-type specific
chr16	30601506	30601529	GGAGGACTGCCTGGAGGAGG	+	chr16	30601519	30601670	8	cell-type specific
chr16	3122882	3122904	CCTGAATCATCCTTACCAC	-	chr16	3122785	3123123	3	cell-type specific
chr16	32376986	32377009	CCTGTCTATGGGTGTGATGG	+	chr16	32376985	32377128	0	cell-type specific
chr16	37967716	37967739	CTGTAGGTACTGCACACATG	+	chr16	37967600	37967837	2	cell-type specific
chr16	41258591	41258614	GTCGAATGTTTTCTTGCAGC	-	chr16	41258305	41258869	9	cell-type specific
chr16	42231657	42231680	TATGCCTGTGTATCTGTGTT	-	chr16	42231493	42231815	7	cell-type specific
chr1	65357038	65357061	GGGAGGGTACAGTGAGAAGA	+	chr1	65356589	65357313	2	cell-type specific
chr16	5472747	5472769	CACAGACAGGAGGTCCCTG	-	chr16	5472742	5472896	0	cell-type specific
chr16	56231618	56231640	AGCCGGTAGAGGGCGCTGG	-	chr16	56231416	56231881	8	cell-type specific
chr1	66506478	66506501	CATCAAAGTGGGTGAGAGTG	-	chr1	66506370	66506571	0	cell-type specific
chr16	8329410	8329433	AGAAGAATGAGGAAGAGAAG	+	chr16	8329393	8329571	0	cell-type specific
chr16	8409443	8409466	TGCGCACATCACAGCAGACT	+	chr16	8409327	8409516	5	cell-type specific
chr16	89990765	89990788	CACCTTGCAGCAGTAGGTCT	-	chr16	89990549	89990813	1	cell-type specific
chr16	91955181	91955204	CTGCTTGCATGTACGCCTGC	+	chr16	91954934	91955317	4	cell-type specific
chr16	92800400	92800423	GCAGGCGGTTGTGCGCTGCT	+	chr16	92800246	92800482	8	cell-type specific
chr16	94018468	94018491	GGGGACATGAAGGCAGGAGG	-	chr16	94018388	94018520	2	cell-type specific
chr16	96691431	96691452	GGAGCTCAGGGGCAGCGG	-	chr16	96691277	96691540	4	cell-type specific
chr16	96691431	96691453	GGGAGCTCAGGGGCAGCGG	-	chr16	96691277	96691540	4	cell-type specific
chr16	96691441	96691464	GAGCCAGCAGGGGGAGCTCA	-	chr16	96691277	96691540	4	cell-type specific
chr16	96691442	96691464	GAGCCAGCAGGGGGAGCTC	-	chr16	96691277	96691540	4	cell-type specific
chr17	17982053	17982076	ATAAGACCCATCCTAAATGT	-	chr17	17982075	17982459	7	cell-type specific
chr1	72364788	72364811	CCAGGAGATGAGTGGGACTG	+	chr1	72364789	72364923	0	cell-type specific
chr17	24675980	24676003	GGAGAGATGACTCCAAGCTT	+	chr17	24675990	24676206	7	cell-type specific
chr17	27016314	27016337	ATGGTTGTGAGCTGCTCCGT	-	chr17	27016125	27016430	5	cell-type specific
chr17	27016315	27016337	ATGGTTGTGAGCTGCTCCG	-	chr17	27016125	27016430	5	cell-type specific
chr17	27530615	27530638	CTGCCCGCGGAGGCCAGAAG	-	chr17	27530539	27530766	5	cell-type specific
chr17	29662751	29662774	GGGGTTCCAATGCCCTCTTG	-	chr17	29662449	29662840	2	cell-type specific
chr17	30785886	30785909	ATTGGATCCTCTGGAACTGG	-	chr17	30785770	30786016	9	cell-type specific
chr17	30989503	30989526	GTGCATGCAGGTGCCTGCAG	-	chr17	30989365	30989597	5	cell-type specific
chr17	34687250	34687273	TTAGGGTTTGGGTTATGGTT	-	chr17	34687206	34687351	0	cell-type specific
chr17	34697538	34697561	GCACCTGTAGAGGCCAGCAG	+	chr17	34697467	34697730	3	cell-type specific
chr17	35557670	35557693	CCTGGAGGGTCTGCAGTTGG	+	chr17	35557399	35557977	6	cell-type specific
chr17	35571882	35571905	GAGCACTGCAGACAGGAAGG	+	chr17	35571777	35572332	3	cell-type specific
chr17	35572237	35572260	GGATGAGGCTGTGACAAACT	+	chr17	35571777	35572332	3	cell-type specific
chr17	36413549	36413572	CTCTGTAGCCATCACTCCCT	+	chr17	36413380	36413744	0	cell-type specific
chr17	43101798	43101821	GGGCATTGTGTGAGCTGTCC	-	chr17	43101683	43101893	5	cell-type specific
chr17	43861667	43861690	GGAGGCCAGAGGTGGATGGT	+	chr17	43861477	43861784	6	cell-type specific
chr17	44396464	44396486	GGAAGGGAAGGGATGTGTG	-	chr17	44396364	44396572	4	cell-type specific
chr17	45211006	45211029	AACACACGCTGCTCTTGCAG	-	chr17	45210821	45211061	8	cell-type specific
chr17	45543504	45543525	ATCTTAGGCGGGCGGTGG	+	chr17	45543319	45543513	5	cell-type specific
chr17	45594721	45594744	TTTCGTTCCTGGCACTGACA	-	chr17	45594457	45594889	4	cell-type specific
chr17	45808869	45808892	CTGGGACTGGAGGGATGGCT	+	chr17	45808816	45809039	7	cell-type specific
chr17	45808943	45808966	GACAGATCCCCTGGCTCTGT	-	chr17	45808816	45809039	7	cell-type specific
chr17	46715727	46715750	AGTCTGATAAGCATTGTGTG	-	chr17	46715616	46715808	4	cell-type specific
chr17	48180121	48180144	GGATCCTAGCACTTAGGAGG	-	chr17	48180143	48180399	3	cell-type specific
chr17	48753119	48753142	GTGCCTTTGATCCCAGTACT	+	chr17	48752877	48753173	7	cell-type specific
chr17	56917133	56917156	TACCTACAGATGCCAGAAGG	+	chr17	56917035	56917292	2	cell-type specific
chr17	64924934	64924957	GCACACTTTGCATGTGCTGT	-	chr17	64924712	64924941	7	cell-type specific
chr17	65420198	65420219	CGGGGAGCTTGGGAGAGG	-	chr17	65420138	65420338	0	cell-type specific
chr17	70214058	70214080	GGTGAGCGAGGGGGTGGGG	-	chr17	70213936	70214079	0	cell-type specific
chr17	76168138	76168161	TGTGGCTGGAGTTGCAAAAG	-	chr17	76167883	76168290	6	cell-type specific
chr17	76168187	76168210	AGACCCTAGTGGTAGGCAGG	-	chr17	76167883	76168290	6	cell-type specific
chr1	78005801	78005824	CTCGTGGAAGCGGCAACAGG	+	chr1	78005799	78005944	0	cell-type specific
chr17	84253354	84253377	ATCAGATCCACTGGAACTGG	-	chr17	84253290	84253732	4	cell-type specific
chr17	84430155	84430177	GTCTGTGTGTCCGTCTGTG	+	chr17	84430156	84430418	8	cell-type specific
chr17	84430261	84430284	AGCCACCTGAAATGGGCTCT	+	chr17	84430156	84430418	8	cell-type specific
chr17	8717418	8717441	GTCTCTGTGTGCCTGGGCAA	+	chr17	8717375	8717590	7	cell-type specific
chr17	87306042	87306066	ATGCAGAGGAGGTGGCAAAGC	+	chr17	87305875	87306434	5	cell-type specific
chr17	88677020	88677043	CGTTGCTGTGTGAGTAGGGG	-	chr17	88676962	88677121	0	cell-type specific
chr17	89098956	89098979	GGAGGCCAGAAGGGGGCGTC	+	chr17	89098744	89099226	3	cell-type specific
chr17	9035364	9035387	GACAAGCAGAACGCAGAGGT	+	chr17	9035359	9035557	0	cell-type specific
chr17	9338643	9338666	GGAAGATGGACCTTAAATGC	+	chr17	9338563	9338807	9	cell-type specific
chr17	94230297	94230319	GGGGGGATGGAGTGGGGTG	+	chr17	94230291	94230694	4	cell-type specific
chr1	80652626	80652649	TGCCTGTAGCGGCCAGAAGG	-	chr1	80652501	80652751	2	cell-type specific
chr1	81020922	81020945	GGGGGTTGGTGGTGGATGGA	+	chr1	81020848	81021049	0	cell-type specific
chr18	11119265	11119288	CCAGGTCAGTGCAGTGTTTC	+	chr18	11119093	11119365	0	cell-type specific
chr18	13455736	13455759	AGAGGCAGTGTCTGTAGAGC	-	chr18	13455647	13455857	0	cell-type specific
chr18	21595506	21595529	GGAGCACTGACCGCACTTGC	+	chr18	21595448	21595728	8	cell-type specific
chr18	23200326	23200349	GTGCGCATGCTGCAGGCTGC	+	chr18	23200283	23200545	6	cell-type specific
chr18	23568722	23568745	GTTATAGGAAGCATTGGATA	+	chr18	23568632	23569084	3	cell-type specific
chr18	24141667	24141690	TGCCCTTAGAAGCCAGAAGG	-	chr18	24141215	24141730	6	cell-type specific
chr18	24448080	24448103	CTTGTCTCACGGAGCTGCTG	+	chr18	24447996	24448300	7	cell-type specific
chr1	82957140	82957162	GTGGCGGTTGTGGCTGCGG	+	chr1	82956672	82957195	1	cell-type specific
chr18	34415866	34415889	GGGGGCTCTCGTCTTGTACT	+	chr18	34415797	34415988	7	cell-type specific
chr18	36042664	36042687	GCTAGCTGTCATGTGGGTGC	+	chr18	36042507	36042831	7	cell-type specific
chr18	36690261	36690284	GTCTGCTTGTAGCCTGTGTG	+	chr18	36690266	36690491	0	cell-type specific
chr1	83733180	83733203	CACCGTTAGCTGTCACTAGG	+	chr1	83733057	83733255	5	cell-type specific
chr18	37377035	37377058	CCGGGGACAGAAGGGGAAGG	+	chr18	37377015	37377210	8	cell-type specific
chr18	37377037	37377060	GGGGACAGAAGGGGAAGGGG	+	chr18	37377015	37377210	8	cell-type specific
chr18	37377155	37377178	CTCCTCTGCGCCGTTGTTTT	-	chr18	37377015	37377210	8	cell-type specific
chr18	37503578	37503601	GTGGGGTCGGGCGCCACCTC	-	chr18	37503503	37503834	0	cell-type specific
chr18	38164429	38164452	TGGAGGTGCTGAGGTGTTAC	-	chr18	38164125	38164502	9	cell-type specific
chr18	38343241	38343264	TGGGAAGGAAACTGTGGGAC	-	chr18	38342988	38343276	9	cell-type specific
chr18	38735278	38735301	GTTCCTCAGTCCCTTGTCCT	+	chr18	38735026	38735613	8	cell-type specific
chr1	84863596	84863619	ACCAGCCTGGGCAACAGAGT	+	chr1	84863338	84863600	2	cell-type specific
chr18	49521971	49521994	GAAGGGGGCACTGTATCCTC	+	chr18	49521612	49522147	8	cell-type specific
chr18	53736598	53736622	AGAAGAGGGCGTCGGATTCCC	+	chr18	53736500	53736766	3	cell-type specific
chr18	53859952	53859975	GGGGCACATGGCTGGGCAGT	-	chr18	53859827	53859974	0	cell-type specific
chr18	61018292	61018314	GGTGCAGGGAGCTAAACTC	+	chr18	61018146	61018329	9	cell-type specific
chr18	64502410	64502433	CGCGGAGTGGAGTGGCGGGG	+	chr18	64502370	64502583	9	cell-type specific
chr18	67453650	67453673	GAAGAGGGCGCTGGATCCCG	+	chr18	67453499	67453857	6	cell-type specific
chr18	68847363	68847386	TGCACGTTATGGTTAAGGGC	-	chr18	68847244	68847391	0	cell-type specific
chr18	75783006	75783029	GTCGAGCATCTGCTTAGCAT	-	chr18	75782959	75783084	0	cell-type specific
chr18	77085349	77085372	CTGGGCACTGAGAGGGTGAG	+	chr18	77085335	77085494	3	cell-type specific
chr1	88218597	88218619	GCGATGGTGGTGGCGGTGG	+	chr1	88218600	88218798	0	cell-type specific
chr1	89179218	89179241	GTGACAGTAGAGGCCAGAGG	-	chr1	89178892	89179407	5	cell-type specific
chr18	9213779	9213802	GGTAGAGACAGTGGCGAAGG	-	chr18	9213517	9213839	8	cell-type specific
chr1	90174332	90174355	CAATTTCCCAGCTCTTGGGA	+	chr1	90174124	90174438	2	cell-type specific
chr1	90181584	90181606	GGGAGTTCAGGGTGAGGGT	+	chr1	90181470	90181780	4	cell-type specific
chr1	90181585	90181607	GGAGTTCAGGGTGAGGGTT	+	chr1	90181470	90181780	4	cell-type specific
chr1	90184053	90184076	GCCGCCATTGGTATTATCTG	+	chr1	90183956	90184599	6	cell-type specific
chr1	90184349	90184372	CTTGCATGCAGTGCCCATGG	-	chr1	90183956	90184599	6	cell-type specific
chr19	11242457	11242480	GTTCCCTGAGCGTTAGGTGT	+	chr19	11242444	11242607	0	cell-type specific
chr1	91509239	91509262	CCCTGCAGGCAGCTAGGAGG	+	chr1	91509261	91509415	0	cell-type specific
chr1	91740877	91740899	GGGAAGGGAACTGGAAGGG	+	chr1	91740666	91741066	5	cell-type specific
chr1	91910238	91910261	AGTGCTTGCTTAGCGTGTCC	-	chr1	91909535	91910292	3	cell-type specific
chr1	92368576	92368599	AGCTGGTGGCGCTGCTTTGG	+	chr1	92368517	92368789	1	cell-type specific
chr19	25448316	25448339	GTGAGCCATTGTGTGGGTAC	+	chr19	25448028	25448525	9	cell-type specific
chr19	27768225	27768248	CACACGGTTGAGAGCTGATG	+	chr19	27768219	27768495	5	cell-type specific
chr19	34053714	34053736	GTTGTGAGTTTTCTCTGCA	+	chr19	34053579	34054073	5	cell-type specific
chr19	3437847	3437870	GGCGGTAGTAGTGGTGGTTG	+	chr19	3437762	3437989	0	cell-type specific
chr19	3706570	3706593	CACTGATCCCAGCACTCAGG	-	chr19	3706371	3706619	4	cell-type specific
chr19	37676907	37676930	GCTTACAGTCCGGGAGGCGC	+	chr19	37676867	37677328	4	cell-type specific
chr19	42360335	42360358	GGGCCGTGTCTAGTTTTCTC	+	chr19	42360253	42360450	0	cell-type specific
chr19	44461389	44461412	GTCTACTACTAGTTGGCAGT	-	chr19	44461277	44461525	3	cell-type specific
chr19	45187085	45187109	ACCACACTCAGCAGGAGTCTG	+	chr19	45187050	45187279	6	cell-type specific
chr19	45493116	45493139	CCTCCAGTAGCTGGGATCAC	+	chr19	45493115	45493269	0	cell-type specific
chr19	46016897	46016920	ATGCCTTTCTTCTGTGGTGC	-	chr19	46016860	46017010	0	cell-type specific
chr19	46211278	46211301	CTCGGGATCAAAGAGAGATG	+	chr19	46211180	46211559	1	cell-type specific
chr1	95296897	95296919	GCCAGGTTGGGCAGGGCAA	-	chr1	95296775	95297003	0	cell-type specific
chr19	53493999	53494023	GTGACTGGAACTCTGCGAATC	+	chr19	53493977	53494101	0	cell-type specific
chr1	95512820	95512842	GGGGGGATGAGGATGGGGT	-	chr1	95512702	95512841	0	cell-type specific
chr19	56215216	56215239	GAGAGGGCAGCAGATTCCGT	+	chr19	56215106	56215413	5	cell-type specific
chr1	95925930	95925953	ATTAGGGTTAGGGTTAGGGT	-	chr1	95925856	95926068	0	cell-type specific
chr19	5998397	5998421	AGAGCCTGTACCTCCAGCTCC	-	chr19	5998152	5998515	8	cell-type specific
chr19	61341280	61341303	CTGTGGATGGTCTAGGGTTC	+	chr19	61341278	61341927	9	cell-type specific
chr2	10233468	10233491	AGCGCCGCCAACTGGGGACC	-	chr2	10233383	10233709	3	cell-type specific
chr2	104509398	104509421	GACTGCTCTTCCAGGGACCC	+	chr2	104509322	104509588	5	cell-type specific
chr2	107809864	107809887	CTGGACTCCATGGGCATTGC	-	chr2	107809720	107810021	2	cell-type specific
chr2	109516546	109516569	AAGAAGGTAAGCACCGGGGC	+	chr2	109516250	109516599	5	cell-type specific
chr2	11175749	11175772	GGCGCCAACTACTGGTGATT	+	chr2	11175665	11176036	9	cell-type specific
chr2	112361429	112361451	TGTCCATGGGGGCCAGCAG	+	chr2	112361321	112361541	3	cell-type specific
chr2	122957263	122957286	GAGACCAGCAAAGAGTGGTG	+	chr2	122957224	122957455	1	cell-type specific
chr2	128643361	128643382	TGGAGGTAGGAGGATCGT	-	chr2	128643245	128643498	9	cell-type specific
chr2	128643361	128643384	GGTGGAGGTAGGAGGATCGT	-	chr2	128643245	128643498	9	cell-type specific
chr2	151773532	151773555	GTGGTGTGTGTGTGTTCATG	-	chr2	151773376	151773575	0	cell-type specific
chr2	152397991	152398013	CACCGCCTGATGCAGGTCC	-	chr2	152397889	152398174	9	cell-type specific
chr2	154407359	154407382	TGTTGCATGCCCTGGAACTG	+	chr2	154407088	154407527	8	cell-type specific
chr2	157000379	157000402	GGTGCCCTCTTCTGGTTCCC	+	chr2	157000348	157000514	3	cell-type specific
chr2	160759836	160759859	CGTCTCTGTTTCCTGAGTGC	+	chr2	160759735	160759951	7	cell-type specific
chr2	162262462	162262485	CTGGGCTAGAAAGATGGCTC	+	chr2	162262406	162262706	4	cell-type specific
chr2	162740504	162740528	GGGGCTGGGTAATTCTGGCTT	-	chr2	162740369	162740557	6	cell-type specific
chr2	163150543	163150566	CCTGACCTCAGCTATGGTGT	+	chr2	163150515	163150639	0	cell-type specific
chr2	164425877	164425900	GTATTCTGCAGGCCAGAAGA	-	chr2	164425738	164426019	9	cell-type specific
chr2	164689038	164689061	CTTGTGCTGAGATTAAAGGT	+	chr2	164689046	164689171	0	cell-type specific
chr2	164783527	164783550	TGGCTGGAAAGATAGCGCAG	+	chr2	164783472	164783722	8	cell-type specific
chr2	164827666	164827688	CGGGCCTGGAAGACAGAAG	+	chr2	164827621	164827906	4	cell-type specific
chr2	167035264	167035285	CAGGCAGGCTGCGAGGTG	+	chr2	167035218	167035393	0	cell-type specific
chr2	167851581	167851604	TGTGCATGCAGTGCCCGAAG	-	chr2	167851271	167851663	5	cell-type specific
chr2	168505507	168505530	GCGCCTGATTCCCTGGGTCT	-	chr2	168505001	168505536	3	cell-type specific
chr2	168505514	168505537	GAAGAGGGCGCCTGATTCCC	-	chr2	168505001	168505536	3	cell-type specific
chr2	168555425	168555448	CTCCCTCTTCTGGCTTCCGT	+	chr2	168555379	168555626	2	cell-type specific
chr2	169185989	169186012	CTGTAAGGCAATCCGAGCCG	-	chr2	169185773	169186185	7	cell-type specific
chr2	169871567	169871590	GATGGCTATGAGTCACCACG	-	chr2	169871456	169871960	8	cell-type specific
chr2	172487920	172487943	AGCACTTGCGGCTCTTCCAG	-	chr2	172487625	172488102	2	cell-type specific
chr2	172939506	172939529	GTTCCCATAGTGGCCAGAAG	-	chr2	172939054	172939614	8	cell-type specific
chr2	181747465	181747487	GTTAGGGTTAGGGTAGGGT	+	chr2	181747453	181747961	0	cell-type specific
chr2	181747465	181747488	GTTAGGGTTAGGGTAGGGTA	+	chr2	181747453	181747961	0	cell-type specific
chr2	19831192	19831214	GGGCTACAGTGAACAGCTG	-	chr2	19831049	19831339	5	cell-type specific
chr2	20690503	20690526	TGGGGGTGGGAGTGAGGAGG	-	chr2	20690331	20690568	9	cell-type specific
chr2	25013468	25013491	AGGGTCCCAGTGTGTGCCCC	-	chr2	25012966	25013629	7	cell-type specific
chr2	27755192	27755215	CGGGAGGGGAAGGGCCGCGG	-	chr2	27754969	27755332	0	cell-type specific
chr2	30122867	30122889	CCCTCCTGGAGCTGTGGTT	+	chr2	30122840	30123000	0	cell-type specific
chr2	30911936	30911959	ATGGCCCTGACTGCAACAGG	-	chr2	30911679	30912304	4	cell-type specific
chr2	31348037	31348060	GTTCCCCTGGAGGCCAGAAG	-	chr2	31347907	31348164	9	cell-type specific
chr2	31467080	31467103	GCCCCCTGCAGGCAGGAGAT	-	chr2	31466958	31467186	8	cell-type specific
chr2	32266071	32266094	AGCAGCCTGACCTGCAGTCT	+	chr2	32265718	32266209	1	cell-type specific
chr2	33204139	33204163	GGCTTCCTGGTGCAGGCCTGG	-	chr2	33203980	33204175	0	cell-type specific
chr2	36458180	36458203	CAGAACACCAATGCCAGCCC	+	chr2	36458067	36458321	0	cell-type specific
chr2	38839125	38839148	CTGATGCACAACATAGGTGC	-	chr2	38838982	38839315	9	cell-type specific
chr2	38860961	38860984	GTCAGGGTGCGGAGGGCATG	+	chr2	38860889	38861083	2	cell-type specific
chr2	3898516	3898539	ATAGATGGTGCTGTGGACGT	+	chr2	3898457	3898628	1	cell-type specific
chr2	49525267	49525290	CTTATGTGAAGCTGTTCTCC	+	chr2	49525239	49525793	1	cell-type specific
chr2	51792463	51792486	GTAGGAAGCAGGGAGTCAGG	-	chr2	51792312	51792515	0	cell-type specific
chr2	53189544	53189567	GGTACCTCGGGGCTCGAGTG	+	chr2	53189512	53189714	1	cell-type specific
chr2	59434797	59434820	GCCCCCTTTCCGCCAATAAG	+	chr2	59434668	59435253	9	cell-type specific
chr2	59883219	59883242	GTACACCTACCTGCCAGAAG	+	chr2	59883006	59883382	4	cell-type specific
chr2	64841640	64841662	CTCCTCTGTTGTTTGTGTC	+	chr2	64841573	64841861	7	cell-type specific
chr2	68820866	68820889	GGGGGAGAGAGGGAAATGGG	-	chr2	68820771	68820988	0	cell-type specific
chr2	69617042	69617065	GTGTGAATAAGGCCAGAAGA	-	chr2	69616924	69617365	7	cell-type specific
chr2	70405586	70405609	AGCACCCCCAAGCGGCAGCC	+	chr2	70405472	70405983	7	cell-type specific
chr2	73803805	73803828	TGCCAGAGAACTGAAGGATG	-	chr2	73803697	73804013	9	cell-type specific
chr2	74532307	74532330	CGTTAACCTCACCGACAGGC	+	chr2	74532163	74532403	7	cell-type specific
chr3	101192739	101192763	CCTGGGGATGCTGTCCAGATA	+	chr3	101192649	101192841	1	cell-type specific
chr3	103007699	103007722	AGTTGTGAGCCACCCAGAGC	+	chr3	103007603	103007783	2	cell-type specific
chr3	104321255	104321278	GGTGCCCTCTTCTGTCCACT	-	chr3	104321147	104321404	5	cell-type specific
chr3	108040654	108040676	AAGGGAGCAGGGTGCAAGG	+	chr3	108040488	108040869	5	cell-type specific
chr3	108040739	108040762	ATTCTGAGAGACTGGAGAGA	+	chr3	108040488	108040869	5	cell-type specific
chr3	117273884	117273907	TGACAAGGGAACATAGCAGA	-	chr3	117273866	117274015	0	cell-type specific
chr3	121227092	121227115	GTTCCTCTTGCGGAGGACTT	-	chr3	121227029	121227159	0	cell-type specific
chr3	123294396	123294419	GGGAGGCGGGGTCGACGAGG	-	chr3	123294253	123294553	4	cell-type specific
chr3	123294413	123294434	GGGGCAGGGTCGACGGGG	-	chr3	123294253	123294553	4	cell-type specific
chr3	129224459	129224482	TATGCCTACAGGCCAGAAGT	+	chr3	129224307	129224540	0	cell-type specific
chr3	130915281	130915305	GTGTGTATGAGTGCAGTGCCC	+	chr3	130915175	130915420	9	cell-type specific
chr3	132999287	132999310	GTGCCTTGGGCCTGGAGAGA	-	chr3	132999210	132999740	2	cell-type specific
chr3	134990699	134990722	GCTGTTCTCGCAGAGGACCC	+	chr3	134990611	134990898	9	cell-type specific
chr3	138123359	138123382	AGCCAGTGTCCGTGACCAGC	+	chr3	138123256	138123435	9	cell-type specific
chr3	138123414	138123436	TGGCTGGACTGCAGTGACG	-	chr3	138123256	138123435	9	cell-type specific
chr3	150048208	150048231	CTGGTGTTTGTTTCTGCCCT	-	chr3	150048001	150048307	9	cell-type specific
chr3	152264787	152264810	CAGAAGCCCAGGTAGGATGT	-	chr3	152264630	152264829	0	cell-type specific
chr3	154121370	154121393	GCAGTGCCGTGCCCATGCAT	+	chr3	154121266	154121517	4	cell-type specific
chr3	17771109	17771132	ATTAATGCAGGACTTGGTGA	+	chr3	17770906	17771243	7	cell-type specific
chr3	26052936	26052959	GTGGCTCGCGGCGATATTGC	+	chr3	26052651	26053000	8	cell-type specific
chr3	32495544	32495568	CCTCTCTCTTCCTGCTGCAGC	-	chr3	32495432	32495596	0	cell-type specific
chr3	34475313	34475336	GTTGACTTTACATGGTGAGT	+	chr3	34475044	34475426	1	cell-type specific
chr3	54360176	54360200	CAGGAAGCAGAGAGGAAGAGT	-	chr3	54359904	54360237	5	cell-type specific
chr3	54597843	54597866	TGTGTATGTAGTACCCATGG	+	chr3	54597754	54598182	5	cell-type specific
chr3	75322188	75322211	GGGGCTCCCAACAATGGAAG	+	chr3	75322192	75322354	0	cell-type specific
chr3	83559030	83559053	GTTGGGTAGCGTGCTGGGCC	+	chr3	83559047	83559177	0	cell-type specific
chr3	8840002	8840024	ATGTGTGTTGGGGTGGGGT	-	chr3	8839925	8840118	0	cell-type specific
chr3	89320468	89320491	AGCTGGTTGCGTGAGGCTGT	+	chr3	89320366	89320754	6	cell-type specific
chr3	89614925	89614947	GCATGTATGCCTGCTGGCC	+	chr3	89614736	89615063	4	cell-type specific
chr3	90028357	90028380	CTTTAGAAAGCTGAGGCAGG	-	chr3	90028281	90028567	3	cell-type specific
chr3	94706758	94706781	ACACAAGGTTATTGAGGGTT	-	chr3	94706652	94707008	9	cell-type specific
chr3	95437061	95437084	GGGGCATGTGTTGGTGTTGT	-	chr3	95436697	95437278	9	cell-type specific
chr3	99038063	99038086	ATGACATAGGCCGGCTACTT	-	chr3	99037940	99038203	9	cell-type specific
chr4	102392425	102392448	GATCCCTGAGCCCTGAATGG	-	chr4	102392271	102392527	8	cell-type specific
chr4	10435599	10435622	CTTGTCTTGGCCTGGATCAT	+	chr4	10435521	10435832	9	cell-type specific
chr4	118221202	118221224	CAGGAGGCAGAGGTGGCAG	+	chr4	118221097	118221337	1	cell-type specific
chr4	118221202	118221225	CAGGAGGCAGAGGTGGCAGT	+	chr4	118221097	118221337	1	cell-type specific
chr4	118221204	118221225	GGAGGCAGAGGTGGCAGT	+	chr4	118221097	118221337	1	cell-type specific
chr4	119286691	119286714	TGGGACAATGAATGGGCCTG	+	chr4	119286649	119286840	0	cell-type specific
chr4	119286693	119286715	GGACAATGAATGGGCCTGT	+	chr4	119286649	119286840	0	cell-type specific
chr4	123137978	123138001	CTTGTTCTTTGCAGGCCAGC	+	chr4	123137895	123138210	7	cell-type specific
chr4	127051856	127051878	CTCTGGAGGCTGGCACTGA	-	chr4	127051771	127051900	0	cell-type specific
chr4	127355869	127355893	CTCCGATCCAGCGCCCTCTTC	-	chr4	127355697	127356160	5	cell-type specific
chr4	129041265	129041288	GGAATGTGGAGTCTTGAATC	+	chr4	129041166	129041460	3	cell-type specific
chr4	129937780	129937803	GTGAGCCACAATGTGGTTGG	-	chr4	129937701	129937962	7	cell-type specific
chr4	129937827	129937850	TATGCCTGCACTCCAGAAGA	-	chr4	129937701	129937962	7	cell-type specific
chr4	129937828	129937851	ATATGCCTGCACTCCAGAAG	-	chr4	129937701	129937962	7	cell-type specific
chr4	130413738	130413761	GTCCCATGTGCGTCAGTAGG	-	chr4	130413608	130413918	4	cell-type specific
chr4	131250642	131250665	CTCAGCCTATCAGGGCTGTC	+	chr4	131250060	131250672	9	cell-type specific
chr4	131737701	131737724	GGCAGCTCGGCCAGCAGGTG	+	chr4	131737604	131737831	6	cell-type specific
chr4	134567464	134567487	GGGGGTCCAGCGCCCTCTTC	-	chr4	134567392	134567594	6	cell-type specific
chr4	135086490	135086514	TAGAGAGAGAGGCTGGAAAGA	-	chr4	135086251	135086515	8	cell-type specific
chr4	135609965	135609989	TGATAATTGAACTCAGGACCT	-	chr4	135609929	135610190	4	cell-type specific
chr4	136455251	136455274	GTCGCCCTCTTCTGGCCTGT	-	chr4	136454910	136455428	8	cell-type specific
chr4	136872086	136872109	GGGTAGTAGGAGTTGAACCT	-	chr4	136872002	136872218	9	cell-type specific
chr4	137938652	137938675	TAAGAGGCCTGCTCTTCCAG	-	chr4	137938441	137938717	9	cell-type specific
chr4	139061535	139061558	AAGAGGGCGCCTGATCCCCC	-	chr4	139061465	139061631	9	cell-type specific
chr4	139481354	139481377	GTACCTCTAGAGGCCAGAGG	+	chr4	139481170	139481551	3	cell-type specific
chr4	139608649	139608672	GGGAGAGTAGAGGGCATGCC	-	chr4	139608451	139608789	8	cell-type specific
chr4	139624521	139624544	GATTCCCGGCACCCACGTGG	+	chr4	139624445	139624799	5	cell-type specific
chr4	139700028	139700051	TCAGGGATGTGGATGGGGAC	+	chr4	139699792	139700175	8	cell-type specific
chr4	142870183	142870206	AAGGTAGGAGGCTGGAGAGA	+	chr4	142870160	142870350	7	cell-type specific
chr4	145714265	145714288	ACCTTTAGTAGCCACAGGGT	+	chr4	145714076	145714638	6	cell-type specific
chr4	146776119	146776142	TGGTGGTCCTGTCGTTCTTG	-	chr4	146775997	146776283	0	cell-type specific
chr4	146904638	146904661	ATATGCCTGAGCACCACAAG	+	chr4	146904563	146904775	1	cell-type specific
chr4	148989177	148989200	GAAGAGGGCACAAGATTCCC	+	chr4	148988986	148989301	2	cell-type specific
chr4	148989218	148989239	GCATGACCTTGTGGGTGC	+	chr4	148988986	148989301	2	cell-type specific
chr4	149525330	149525352	GGGGCGGTAGAGGCAGGGG	-	chr4	149525221	149525525	8	cell-type specific
chr4	149701415	149701438	GTACCTATGGAGGCCAGGGG	+	chr4	149701372	149702054	7	cell-type specific
chr4	150067323	150067345	GTGGGCAGCCAGGACTGCA	-	chr4	150067162	150067444	9	cell-type specific
chr4	151271333	151271356	GTCACGCTGGGGTCACGCTG	+	chr4	151271351	151271599	5	cell-type specific
chr4	151349736	151349759	CTCCCCCTTCTGGCCTCTGC	+	chr4	151349603	151349897	9	cell-type specific
chr4	151349737	151349759	TCCCCCTTCTGGCCTCTGC	+	chr4	151349603	151349897	9	cell-type specific
chr4	154588286	154588309	AGGGGCTTGCTTTGGGAGGA	-	chr4	154588120	154588311	1	cell-type specific
chr4	154892560	154892583	GCCGCTGGGGTTAAGGGAGT	+	chr4	154892380	154892732	2	cell-type specific
chr4	22485153	22485174	GTGGGAAAGGAGCCAGGG	-	chr4	22485046	22485176	0	cell-type specific
chr4	40588083	40588106	GGCGTGGAGAGATGGCTCGG	+	chr4	40588083	40588437	8	cell-type specific
chr4	40725733	40725756	GTTCTGAGCCATCATGTGGT	+	chr4	40725751	40726093	8	cell-type specific
chr4	40725907	40725931	GGGCTGGAACGATGGCTCAGC	-	chr4	40725751	40726093	8	cell-type specific
chr4	41192643	41192666	ATTATGCCTGGTGCCCTTGG	-	chr4	41192532	41192927	8	cell-type specific
chr4	43540649	43540672	GGTACATTTCCAGAGGACCC	+	chr4	43540638	43540761	0	cell-type specific
chr4	43774312	43774335	GATGTGTGCTCTTTGCTGCC	-	chr4	43774226	43774469	6	cell-type specific
chr4	43774456	43774479	CTACTTGTCTGTCTGAGTGT	-	chr4	43774226	43774469	6	cell-type specific
chr4	44562499	44562523	GTCCACTTTTCAATCAGTCAT	-	chr4	44562351	44562581	0	cell-type specific
chr4	44989669	44989692	CATGGGGCTGGCTCTGTGCT	+	chr4	44989642	44990071	5	cell-type specific
chr4	45235489	45235512	CTGTCTCTAACTCCAGTGCC	-	chr4	45235331	45235606	3	cell-type specific
chr4	5442606	5442629	AGCAAAAGAAGGCGGGGACC	+	chr4	5442472	5442854	1	cell-type specific
chr4	57475457	57475480	GAATGGAACTCCAGTTCCAG	-	chr4	57475372	57475666	7	cell-type specific
chr4	58450354	58450377	GTCGCGGTAGGAGTAGATGA	+	chr4	58450206	58450690	8	cell-type specific
chr4	58450378	58450401	GTTCATAGCAGAGTTGAACT	+	chr4	58450206	58450690	8	cell-type specific
chr4	58450390	58450412	GTTGAACTCGGCCAGGAGG	+	chr4	58450206	58450690	8	cell-type specific
chr4	58940675	58940698	GTGGTTGTGAGCCAACACGT	-	chr4	58940582	58940858	9	cell-type specific
chr4	58940676	58940698	GTGGTTGTGAGCCAACACG	-	chr4	58940582	58940858	9	cell-type specific
chr4	59013602	59013626	GGGAAGTGAACTTAGGACCTC	-	chr4	59013404	59013738	9	cell-type specific
chr4	64753481	64753504	CCTGCCTGCAAGGTGTGTTG	-	chr4	64753341	64753595	7	cell-type specific
chr4	84483125	84483148	GGGCAGAGTAGCTATAGAAT	+	chr4	84482961	84483157	9	cell-type specific
chr4	86184075	86184099	GTGGCCTGCTGGCATACATGC	-	chr4	86183913	86184318	9	cell-type specific
chr4	88518938	88518961	CCTCTGTTCTATACAGTTGA	-	chr4	88518762	88519048	8	cell-type specific
chr4	88775547	88775570	GGCCAATTAAGGAGGGAGGA	+	chr4	88775275	88775772	9	cell-type specific
chr4	99789247	99789270	GTAATTGTGAGCCACCAAGT	+	chr4	99789111	99789622	2	cell-type specific
chr5	100015510	100015532	GAGAAGCCAAGTGGAGCCT	+	chr5	100015485	100015773	0	cell-type specific
chr5	100503786	100503809	GTCATCCTTAAAGACCTGGA	+	chr5	100503619	100503863	7	cell-type specific
chr5	100866230	100866253	GTGCTGGTAACTGAACCAGG	-	chr5	100866126	100866454	8	cell-type specific
chr5	100904217	100904240	GCTGGAGCCAGGCATGGTGG	+	chr5	100904075	100904246	0	cell-type specific
chr5	102117757	102117780	AGCCATCGGACAGCTGGGTG	-	chr5	102117558	102118038	5	cell-type specific
chr5	105828603	105828626	CAGTGCCTTCGTGCACAAGT	+	chr5	105828428	105828689	0	cell-type specific
chr5	112498595	112498618	GGAAATATTAAGCGGTTGAC	+	chr5	112498569	112498744	0	cell-type specific
chr5	113430156	113430179	GTCCATGTAGATTGTGTTGT	-	chr5	113429936	113430258	0	cell-type specific
chr5	115657576	115657598	CTCGTGATTTGATGGGTTC	-	chr5	115657428	115657630	7	cell-type specific
chr5	119287262	119287284	GAGAGGTGCTAATTGTGGT	-	chr5	119287028	119287382	2	cell-type specific
chr5	120265491	120265514	GACTCAGCAGGTAAGAGCCC	-	chr5	120265262	120265579	2	cell-type specific
chr5	120942639	120942663	GGAGCATCCTTGAGGGAGGGT	-	chr5	120942483	120942995	9	cell-type specific
chr5	120942661	120942684	GGGGCCGCAAGGTGGGAGGA	-	chr5	120942483	120942995	9	cell-type specific
chr5	121433135	121433157	CACCAGGCTGCTCAGGAGC	+	chr5	121432975	121433320	7	cell-type specific
chr5	121651768	121651791	AGCATTTGGGAGGCAGGCGC	+	chr5	121651760	121652071	8	cell-type specific
chr5	122122410	122122432	GGATGGTGGTGCGGGATGT	+	chr5	122122339	122122531	0	cell-type specific
chr5	124072492	124072515	AGGGCAGAGGTGAGGAGCAA	+	chr5	124072466	124072751	2	cell-type specific
chr5	126207391	126207414	TTCCTCACTAGGGGCGCCTA	+	chr5	126207248	126207425	3	cell-type specific
chr5	127690694	127690717	GTTTGCCTGCGTGCCAGAAG	-	chr5	127690422	127690840	1	cell-type specific
chr5	127821713	127821736	GCCACCAGAGGGCGCTCTGA	-	chr5	127821311	127821762	9	cell-type specific
chr5	128139859	128139880	AGGATTTCCTGGGACTGG	-	chr5	128139683	128140014	7	cell-type specific
chr5	129143347	129143370	GTTCTCATGGAGGCCAGAAG	+	chr5	129143170	129143450	3	cell-type specific
chr5	129193175	129193198	CATCCATGCAGTACCTGCAG	+	chr5	129193067	129193385	3	cell-type specific
chr5	129484999	129485022	CCTGGAGGTGGAGTTACAGC	-	chr5	129484914	129485121	5	cell-type specific
chr5	130786140	130786163	TGTCTGCCGAGGCCAGAAGG	+	chr5	130786075	130786269	8	cell-type specific
chr5	130786141	130786163	GTCTGCCGAGGCCAGAAGG	+	chr5	130786075	130786269	8	cell-type specific
chr5	130869472	130869494	CCTGGGAAGAGGATTGGCT	+	chr5	130869483	130869790	2	cell-type specific
chr5	131454023	131454046	CCCCTGGTGCAGGAGTTAGA	-	chr5	131453818	131454153	1	cell-type specific
chr5	131754092	131754115	GTGCTTGCAGGAGCCTGTGG	-	chr5	131754025	131754148	1	cell-type specific
chr5	134703498	134703521	GTGCACACACTCAGGAATTG	+	chr5	134703377	134703667	8	cell-type specific
chr5	135021225	135021248	GTCTGTTCTTCCAGAAGACC	+	chr5	135021039	135021565	8	cell-type specific
chr5	135050865	135050888	ACGCCCTCTTCTGGCTCCCT	+	chr5	135050797	135051044	5	cell-type specific
chr5	135050882	135050905	TATGTGCATGCAGATGCCCA	-	chr5	135050797	135051044	5	cell-type specific
chr5	135592698	135592721	GGTGATTGTTGGGCCCCCCC	-	chr5	135592561	135592702	0	cell-type specific
chr5	136323543	136323567	TGTACAGGCACTGCATGCACA	+	chr5	136323414	136323735	7	cell-type specific
chr5	136618707	136618731	AGCGGGCTGGAGAGATGGCTC	+	chr5	136618689	136618935	9	cell-type specific
chr5	137371658	137371681	GGGCAGGGTAGGAGGTGAGG	+	chr5	137371550	137371780	6	cell-type specific
chr5	141219695	141219717	GGAACAGCCACCAGAGGGA	-	chr5	141219599	141220123	6	cell-type specific
chr5	141685468	141685491	CACAACTGTCTGTAGTTAGG	+	chr5	141685291	141685607	1	cell-type specific
chr5	142716326	142716349	CACCAAAATGTGAGGCGCTG	-	chr5	142716212	142716609	4	cell-type specific
chr5	143702639	143702662	GGGCCATCTCTCCACTCCTG	-	chr5	143702615	143702932	3	cell-type specific
chr5	144993369	144993392	GTTGAGGGTAATCAGGCTTC	+	chr5	144993333	144993542	0	cell-type specific
chr5	145849262	145849285	GTCTATAGCTCCAGCTCCAG	+	chr5	145849194	145849360	3	cell-type specific
chr5	147378873	147378896	GCTGGGTGTGAGCTGCTGTG	+	chr5	147378613	147379002	9	cell-type specific
chr5	148096155	148096178	CACCATATGTGCAGTACCTG	-	chr5	148095959	148096185	5	cell-type specific
chr5	148528597	148528620	CGTACATCTCAGTGTGCTGC	-	chr5	148528368	148528742	6	cell-type specific
chr5	148528690	148528712	CCTTGTTTCTGCAGGTTGG	-	chr5	148528368	148528742	6	cell-type specific
chr5	149180823	149180846	CTCTTATGGGGCTGGAGAGA	+	chr5	149180798	149181059	6	cell-type specific
chr5	15006724	15006747	GGCAGAGCTTAAAGGGTTGG	-	chr5	15006634	15007148	0	cell-type specific
chr5	150515662	150515685	CTCACACACTAGAGTGAGGC	+	chr5	150515621	150516023	5	cell-type specific
chr5	150826922	150826945	CTGTAGGAACTGCATGCATG	-	chr5	150826680	150827200	7	cell-type specific
chr5	21924878	21924901	GTGCGGGTGTCCTTGGGTTT	+	chr5	21924838	21924971	0	cell-type specific
chr5	23262325	23262348	GTTTGTCAGTGGCCTGGTGT	-	chr5	23262198	23262578	5	cell-type specific
chr5	23841779	23841802	AGCAGGTCGAGTGGGAAGGA	-	chr5	23841614	23841802	7	cell-type specific
chr5	24040292	24040315	GAAGAGGGCGTTCGATTCCC	+	chr5	24040254	24040409	7	cell-type specific
chr5	27942160	27942183	TCACTGCGCTACATAACACC	+	chr5	27942079	27942288	0	cell-type specific
chr5	29806019	29806042	TCCTCCTGCCGGCCGAGTTC	+	chr5	29805919	29806138	4	cell-type specific
chr5	30126447	30126470	GTCGCTGGTGGGCAAAGTGT	+	chr5	30126438	30126610	0	cell-type specific
chr5	31524214	31524237	TGGCAATGAGCTATAATGCT	-	chr5	31523985	31524219	9	cell-type specific
chr5	35587208	35587229	AGGGAGTTGGGTGAGGGC	+	chr5	35586742	35587296	8	cell-type specific
chr5	37177599	37177622	GTGGGATGGTGTCACTCTGT	+	chr5	37177599	37177832	0	cell-type specific
chr5	37474877	37474900	GCCCCGATTTCTGTCAGTGA	+	chr5	37474867	37475048	0	cell-type specific
chr5	38208309	38208332	CCGGTTCTCGCGGCCCTACA	-	chr5	38208101	38208420	5	cell-type specific
chr5	44673436	44673459	GGTGGCTTGCTTCAAGTTTC	+	chr5	44673428	44673561	0	cell-type specific
chr5	51170528	51170551	GCTCTGTTTTGCTGCAGTGA	+	chr5	51170447	51170707	7	cell-type specific
chr5	51170564	51170587	GCAGCCAGCAGGGGGAGACA	-	chr5	51170447	51170707	7	cell-type specific
chr5	67702389	67702412	GAGAAGGAAAGGAAAGGAAT	-	chr5	67702340	67702541	0	cell-type specific
chr5	68169421	68169443	GTGACTGCAGTAGCTCTAA	+	chr5	68169294	68169532	8	cell-type specific
chr5	74469119	74469142	GTCTTTGGAGGCTGGAGAGA	+	chr5	74469095	74469223	1	cell-type specific
chr5	89164013	89164036	GAAGAGGGCAGCCAATCCCC	+	chr5	89163715	89164087	8	cell-type specific
chr6	100229007	100229030	TAAGAGCTGACTCTGGTGGT	+	chr6	100229015	100229251	0	cell-type specific
chr6	105041078	105041101	GAAGAGGGCATGAGATCCCT	-	chr6	105040916	105041224	8	cell-type specific
chr6	113356827	113356851	GCGCCCTCTCCTGGTCTCCAC	-	chr6	113356655	113357006	8	cell-type specific
chr6	113356828	113356851	GCGCCCTCTCCTGGTCTCCA	-	chr6	113356655	113357006	8	cell-type specific
chr6	117808102	117808125	CAGCTGGGGAGACAGATCAG	+	chr6	117807905	117808134	2	cell-type specific
chr6	125160578	125160601	GTTGCTCTTCTAGGGGACCT	+	chr6	125160509	125160743	3	cell-type specific
chr6	126756986	126757009	AGCAGAGGGTGTCAGATCCC	+	chr6	126756787	126757137	8	cell-type specific
chr6	127405666	127405689	ATTGGAGTTAGCTGCCATGT	+	chr6	127405579	127405871	7	cell-type specific
chr6	128252653	128252676	CTGCCTGCTTTAACTTTCTC	-	chr6	128252551	128252896	4	cell-type specific
chr6	128417466	128417489	AATGGCCCTGTCCTGCTGTA	-	chr6	128417311	128417655	8	cell-type specific
chr6	131663018	131663041	CTCCCTCTGGTGCTCGAGTC	-	chr6	131662912	131663105	4	cell-type specific
chr6	133920629	133920652	GGGGGTGTGGGTGTGAGTGT	-	chr6	133920542	133920819	1	cell-type specific
chr6	144856266	144856289	TGCCTGTGGCGGCCAGAAGA	+	chr6	144856176	144856363	2	cell-type specific
chr6	146338850	146338873	GTGCATGTGACGGCCAGAGG	+	chr6	146338747	146338994	7	cell-type specific
chr6	21164002	21164025	CAACCATGGCCACTAGATGG	-	chr6	21163890	21164208	8	cell-type specific
chr6	29491409	29491432	GGAAGCGCGGGGATGCGAGT	-	chr6	29491427	29491571	0	cell-type specific
chr6	38080057	38080080	GTTCCCACTGAGGCCAGCAG	+	chr6	38079974	38080362	8	cell-type specific
chr6	38080061	38080084	ATGCCCTCTGCTGGCCTCAG	-	chr6	38079974	38080362	8	cell-type specific
chr6	48155948	48155970	GTCAGGAGGCAGCTGGTGA	+	chr6	48155767	48156111	6	cell-type specific
chr6	48747736	48747760	GTTGTACTGGGCAATAGAAGG	-	chr6	48747666	48747825	0	cell-type specific
chr6	51882178	51882200	CTGGGGGTGAGTGAGCTGG	-	chr6	51882039	51882253	1	cell-type specific
chr6	52154628	52154651	GTCCGACTGAACGGCGGCAA	-	chr6	52154361	52154873	8	cell-type specific
chr6	60497419	60497441	GCCCAGGATTGGGTGGCGT	+	chr6	60497387	60497567	0	cell-type specific
chr6	64558127	64558150	GGGTGTAATAACCTTGTGGC	-	chr6	64558007	64558268	5	cell-type specific
chr6	73255553	73255576	AGCACTTGGACCCCAGTTGG	-	chr6	73255430	73255696	2	cell-type specific
chr6	77527838	77527861	CCCCCATGCCTCTCACAGAG	-	chr6	77527643	77528023	3	cell-type specific
chr6	82005571	82005594	CACCCTTCGGAGTGCCTGGA	+	chr6	82004921	82005583	9	cell-type specific
chr6	83077644	83077667	GCTTGCTGGGACTTGAACCC	+	chr6	83077511	83077777	6	cell-type specific
chr6	84354865	84354888	GAAGAGGGCATCGGAGTCCC	-	chr6	84354784	84354910	9	cell-type specific
chr6	86416266	86416288	GGGGGAGATGCGGTGAGTG	+	chr6	86416229	86416446	1	cell-type specific
chr6	95157243	95157266	GTGCCCACAACGGCCAGAAG	+	chr6	95157101	95157549	7	cell-type specific
chr6	97189572	97189595	GGCTATGTGCATGTGAGTGT	-	chr6	97189361	97189853	7	cell-type specific
chr6	98213123	98213146	GCTGGAGTTATAGTAGGATA	-	chr6	98213023	98213245	1	cell-type specific
chr7	106410392	106410414	GGGCCAGGGCCTCGAGGCG	+	chr7	106410396	106410664	6	cell-type specific
chr7	106410392	106410415	GGGCCAGGGCCTCGAGGCGA	+	chr7	106410396	106410664	6	cell-type specific
chr7	108647645	108647668	GGGAGGTTTACAGGAAGATG	-	chr7	108647436	108647791	4	cell-type specific
chr7	121875380	121875403	GAGACTGCAATTGGGGAGGA	-	chr7	121874901	121875463	6	cell-type specific
chr7	129444894	129444917	GTGAATGCAGGTGTCTGTGG	+	chr7	129444856	129445014	2	cell-type specific
chr7	130182971	130182995	AATGCCCAGGAAGACCAGAAG	+	chr7	130182769	130183090	8	cell-type specific
chr7	132891347	132891370	GGTTGCCTGCTGTTTATGGG	+	chr7	132891361	132891507	0	cell-type specific
chr7	133981114	133981137	GTCAATAAACAGGACGTCAC	+	chr7	133981054	133981263	0	cell-type specific
chr7	134346437	134346459	GTCGGGGCTGAGGCAAGGC	-	chr7	134346271	134346646	0	cell-type specific
chr7	13578225	13578248	TGCCTCACTGTAGCGAAGTC	-	chr7	13577623	13578352	3	cell-type specific
chr7	145718499	145718522	GTTCGGATGGTCTGTTCTGT	+	chr7	145718464	145718613	0	cell-type specific
chr7	151402965	151402989	CTGTGTCTGGGCAGGCTCCAT	-	chr7	151402888	151403035	0	cell-type specific
chr7	151402966	151402989	CTGTGTCTGGGCAGGCTCCA	-	chr7	151402888	151403035	0	cell-type specific
chr7	18686294	18686316	AGTGAGGCTAGGACCACAA	+	chr7	18686194	18686488	3	cell-type specific
chr7	19986422	19986445	GTCCTCTGCAAGGGCAGCTA	-	chr7	19986424	19986604	5	cell-type specific
chr7	25384442	25384466	GTATGACTTGCAGGTGCACTG	-	chr7	25384305	25384623	8	cell-type specific
chr7	27916475	27916497	CCTCTGCTGATTGGTACCC	-	chr7	27916496	27916734	7	cell-type specific
chr7	28056664	28056687	ACAGTTGTGAGCCATCTTGT	+	chr7	28056573	28056768	7	cell-type specific
chr7	28075667	28075689	AGGGGCTGGAGGGGTGACT	+	chr7	28075545	28075830	3	cell-type specific
chr7	28075667	28075690	AGGGGCTGGAGGGGTGACTG	+	chr7	28075545	28075830	3	cell-type specific
chr7	28127951	28127974	GGCAGGGGAGATGGCTCAGA	+	chr7	28127687	28128025	7	cell-type specific
chr7	28170495	28170518	GTCCTAAGTGCTGGGATTGC	+	chr7	28170369	28170524	0	cell-type specific
chr7	29388984	29389007	AGTCCCTGGAGGCCAGCAGA	+	chr7	29388968	29389159	9	cell-type specific
chr7	29758259	29758281	GTGTATCTGAGGAGAGCAA	+	chr7	29758157	29758378	6	cell-type specific
chr7	31532807	31532830	GAAGAGGAGGCTCAGTGGGT	-	chr7	31532353	31532835	6	cell-type specific
chr7	3339146	3339167	GCTGGGGCAGGGGTGAGG	+	chr7	3339133	3339384	2	cell-type specific
chr7	3339146	3339169	GCTGGGGCAGGGGTGAGGAG	+	chr7	3339133	3339384	2	cell-type specific
chr7	3352255	3352278	CTCTGCCCCTCACAGCACTG	+	chr7	3352211	3352337	0	cell-type specific
chr7	3437045	3437067	GGCTGGGCAGATAGCTCAG	-	chr7	3436745	3437142	2	cell-type specific
chr7	35401505	35401528	CCTGGAGTTGGAGTTAGTGG	+	chr7	35401318	35401579	8	cell-type specific
chr7	35462366	35462389	GTTGTGCTGAGAATTGAACC	-	chr7	35462142	35462448	3	cell-type specific
chr7	35611765	35611787	ATTCCCAGTACCCATGAGG	-	chr7	35611463	35611841	9	cell-type specific
chr7	35623804	35623826	GAGGCACCGAGATGCACTG	+	chr7	35623751	35624041	1	cell-type specific
chr7	35623945	35623968	GTACCCTCAGAGGCCAGCAG	-	chr7	35623751	35624041	1	cell-type specific
chr7	35965118	35965141	CCTGGAACTGGAGTTGCGGA	+	chr7	35964964	35965237	2	cell-type specific
chr7	36044624	36044647	GAGCTTGTGAGGCACTGTGT	+	chr7	36044271	36044754	9	cell-type specific
chr7	36053099	36053122	CGTTGCCCAGCATGCATGTT	-	chr7	36052995	36053155	9	cell-type specific
chr7	38975557	38975581	GGGCACTGGCTGCTCTTGCTG	-	chr7	38975360	38975606	8	cell-type specific
chr7	50393366	50393389	GGGGAAGAGGCAGAGGGAGT	+	chr7	50393287	50393608	0	cell-type specific
chr7	52975839	52975862	CTCACTTGGTATGGCTGTGT	-	chr7	52975811	52976138	4	cell-type specific
chr7	52975839	52975863	ACTCACTTGGTATGGCTGTGT	-	chr7	52975811	52976138	4	cell-type specific
chr7	54567836	54567859	GTCACGGTCTCACCACTAGA	+	chr7	54567725	54568125	5	cell-type specific
chr7	57120958	57120981	GAGTGGAGCTGACTCTGGTC	+	chr7	57120810	57121123	4	cell-type specific
chr7	57443107	57443130	GTGGGTGTTGGTATGGGTGT	-	chr7	57442935	57443129	0	cell-type specific
chr7	64193559	64193582	AGAAGTGTGACATTGCGGGA	-	chr7	64193207	64193677	2	cell-type specific
chr7	64639820	64639844	ATCCTGTGCCAACGATAGAGC	-	chr7	64639573	64639839	6	cell-type specific
chr7	67873174	67873197	GTGGGAGTGGGTAGGTGGCT	+	chr7	67873123	67873481	4	cell-type specific
chr7	91021890	91021913	GGGGAGGAAAGAGAGATGTG	+	chr7	91021895	91022032	0	cell-type specific
chr7	97674675	97674697	GGGGGAGCGGGGCGGGGTG	-	chr7	97674591	97674863	1	cell-type specific
chr7	97674676	97674697	GGGGGAGCGGGGCGGGGT	-	chr7	97674591	97674863	1	cell-type specific
chr8	106615713	106615735	AGGGCACCGAGGAGGAAGG	-	chr8	106615351	106615801	3	cell-type specific
chr8	109198823	109198844	CGGGGAGGTGGGGACAGG	+	chr8	109198782	109199284	9	cell-type specific
chr8	109910575	109910598	GCACCAGGCAGATTAAGTCA	-	chr8	109910301	109910825	9	cell-type specific
chr8	110180679	110180701	ATGGGAATGGAATGACAGA	-	chr8	110180593	110180935	5	cell-type specific
chr8	110251250	110251273	GGGGGCTTGACTTTTGTTTT	+	chr8	110251169	110251580	6	cell-type specific
chr8	114204766	114204788	GGGGCTCCAGCGAGCTCGT	+	chr8	114204397	114204862	7	cell-type specific
chr8	11868025	11868048	CATGCATGCAATGCCTGCAG	-	chr8	11867804	11868132	9	cell-type specific
chr8	119195472	119195495	GTGCGTGCATGTGTGTGCAG	+	chr8	119195474	119195753	4	cell-type specific
chr8	119573583	119573606	CAGACCATAAGCCCAGTGCG	+	chr8	119573506	119573917	6	cell-type specific
chr8	119702015	119702038	GCCTGGAAAGATGACTCAGT	+	chr8	119702032	119702272	8	cell-type specific
chr8	121209827	121209850	GGCTTCATGCTCCTGCTGGT	-	chr8	121209781	121210057	2	cell-type specific
chr8	121824500	121824523	CTTGCTTGCTGCTCTTCCAG	-	chr8	121824205	121824515	7	cell-type specific
chr8	122198092	122198115	AACACGTGTGAGCCACCACG	+	chr8	122197976	122198355	9	cell-type specific
chr8	122491524	122491545	GCCTGAGGCGGCCAGCAG	+	chr8	122491289	122491640	4	cell-type specific
chr8	124332261	124332284	CAGCACTCCGGAGGCAGCAG	+	chr8	124332042	124332543	9	cell-type specific
chr8	125083201	125083224	CAGGCAGGACCTCTCTGTGC	+	chr8	125083100	125083422	4	cell-type specific
chr8	126021810	126021833	GCCAGGTGTGGTGAGGTGGG	+	chr8	126021594	126021952	3	cell-type specific
chr8	126974258	126974281	GTGTAGTACCTGCAGATGCC	+	chr8	126974215	126974383	5	cell-type specific
chr8	128356296	128356319	TGAACGTGCTGCTTACATGC	+	chr8	128356080	128356534	7	cell-type specific
chr8	129043623	129043647	AACCACTGCAACTCCAGCTCC	+	chr8	129043569	129043952	7	cell-type specific
chr8	129043645	129043668	GGGGATCTGGCGCCCTCTTG	+	chr8	129043569	129043952	7	cell-type specific
chr8	129249448	129249471	GGAGGAGGCTGAGTGAATCC	-	chr8	129249337	129249527	0	cell-type specific
chr8	13334874	13334897	TGTCAGTATCTCCAGTTCCA	-	chr8	13334756	13334986	8	cell-type specific
chr8	19339431	19339453	GTTGATGTTGTTTGTGCTA	+	chr8	19339360	19339546	0	cell-type specific
chr8	19784632	19784655	CGAGCTGGGCGCCTGGCCAT	-	chr8	19784453	19784807	9	cell-type specific
chr8	19784632	19784656	CCGAGCTGGGCGCCTGGCCAT	-	chr8	19784453	19784807	9	cell-type specific
chr8	19784668	19784690	GGCGGATGGAACGCAGACC	+	chr8	19784453	19784807	9	cell-type specific
chr8	19784668	19784691	GGCGGATGGAACGCAGACCT	+	chr8	19784453	19784807	9	cell-type specific
chr8	19784772	19784795	AGGGAGTTCATGGCGGTGAC	+	chr8	19784453	19784807	9	cell-type specific
chr8	19893089	19893112	CAGGCGCCCAGCTCGGGACG	-	chr8	19893022	19893313	0	cell-type specific
chr8	19980818	19980841	CACCCCTAGAGGACAGCACT	-	chr8	19980669	19980907	0	cell-type specific
chr8	19980819	19980841	CACCCCTAGAGGACAGCAC	-	chr8	19980669	19980907	0	cell-type specific
chr8	19982837	19982860	GCCAAGTGCTATCTGAACCA	+	chr8	19982591	19983183	1	cell-type specific
chr8	19982927	19982950	TTCCCTGTTTCCGATCCTGC	+	chr8	19982591	19983183	1	cell-type specific
chr8	19982971	19982993	CTCCCTTCTTGTAGGAGCC	-	chr8	19982591	19983183	1	cell-type specific
chr8	19984641	19984664	ACTAAAAGGAACTGGAGATA	-	chr8	19984575	19984901	0	cell-type specific
chr8	19984776	19984799	CATGGCCAGGTTTTAAGTCT	+	chr8	19984575	19984901	0	cell-type specific
chr8	20019883	20019906	GGAGTCGTCGCCTGGGGACG	-	chr8	20019788	20019911	0	cell-type specific
chr8	20020327	20020349	CGGACGGAACGCAGACCTG	-	chr8	20020279	20020581	1	cell-type specific
chr8	20020327	20020350	GCGGACGGAACGCAGACCTG	-	chr8	20020279	20020581	1	cell-type specific
chr8	20020327	20020351	GGCGGACGGAACGCAGACCTG	-	chr8	20020279	20020581	1	cell-type specific
chr8	20020328	20020350	GCGGACGGAACGCAGACCT	-	chr8	20020279	20020581	1	cell-type specific
chr8	20020328	20020351	GGCGGACGGAACGCAGACCT	-	chr8	20020279	20020581	1	cell-type specific
chr8	20020328	20020352	TGGCGGACGGAACGCAGACCT	-	chr8	20020279	20020581	1	cell-type specific
chr8	20020351	20020374	ATTCTACCGCGTCCCGGGCT	+	chr8	20020279	20020581	1	cell-type specific
chr8	20020406	20020429	CACAGGAAAAGTCCTCCGTG	+	chr8	20020279	20020581	1	cell-type specific
chr8	20020406	20020430	CACAGGAAAAGTCCTCCGTGC	+	chr8	20020279	20020581	1	cell-type specific
chr8	20020418	20020441	CGGATGGGTTTCCCGCACGG	-	chr8	20020279	20020581	1	cell-type specific
chr8	23132854	23132877	GCTGTTGCTCCCGGGGATGA	+	chr8	23132758	23133037	3	cell-type specific
chr8	28049694	28049716	GTCAGTGGAGGCCAGCAGA	-	chr8	28049571	28049852	8	cell-type specific
chr8	28787791	28787814	GTTCCCTCGGAGGCCAGAAG	-	chr8	28787644	28788046	8	cell-type specific
chr8	3375938	3375961	TGACCACAGAGGCCAGCAGG	+	chr8	3375800	3376063	9	cell-type specific
chr8	4141802	4141825	CCTTCCTGGAACTGGAGAGA	+	chr8	4141799	4141938	1	cell-type specific
chr8	46140830	46140853	CTGTAGTCCTGGCATTTGGG	+	chr8	46140826	46141152	1	cell-type specific
chr8	71231613	71231636	GTGTGCTTGGAATTGAATCC	-	chr8	71231554	71231940	7	cell-type specific
chr8	75874482	75874505	GAAGGATGGAGAGAGACACT	+	chr8	75874339	75874691	7	cell-type specific
chr8	77365208	77365231	AACAAGGTGGTCATAACATC	-	chr8	77365166	77365372	0	cell-type specific
chr8	78852585	78852608	AAGGAGGAGGGCAACCTGGT	-	chr8	78852471	78852814	2	cell-type specific
chr8	78852598	78852620	CTGGAAGAGGTCAAGGAGG	-	chr8	78852471	78852814	2	cell-type specific
chr8	8147712	8147735	AGGGATCTGATGCCCTCTGG	+	chr8	8147572	8147942	7	cell-type specific
chr8	82130311	82130334	GTGCCTGCAGGGGCCAGCAG	-	chr8	82130232	82130531	4	cell-type specific
chr8	86539882	86539904	GCCTGTTGGAGGCCAGAAG	+	chr8	86539842	86540026	2	cell-type specific
chr8	86549376	86549399	GGTGGAGAAGTTAGAAAGGT	-	chr8	86549215	86549634	0	cell-type specific
chr8	86861373	86861395	CATGGGATGTTTCTGTCGT	+	chr8	86861306	86861717	4	cell-type specific
chr8	87355543	87355566	CGTGCGTTGGCCGGGCGGTA	-	chr8	87355413	87355713	9	cell-type specific
chr8	92587397	92587420	CCAAGTGCATGCAGTGCCCT	-	chr8	92587218	92587486	5	cell-type specific
chr8	97741840	97741863	GACGGAAATAATGAGGATCA	-	chr8	97741755	97741913	0	cell-type specific
chr9	110559533	110559556	GGACAGCTAGTGACCTTTCT	+	chr9	110559392	110559588	7	cell-type specific
chr9	110681815	110681838	CTCAGGGTCAGATGTTAGCA	-	chr9	110681667	110682000	7	cell-type specific
chr9	110776252	110776275	TCGGGATGCTGGCACCGTCG	-	chr9	110776240	110776374	1	cell-type specific
chr9	113066061	113066084	TCTGAGTGCAGTGCCTGCAG	-	chr9	113065924	113066328	6	cell-type specific
chr9	114431400	114431424	CACCACCCTATTCGTGGTGTG	+	chr9	114431212	114431540	4	cell-type specific
chr9	114619623	114619646	ATATGGCTGCCTGCCAGAAG	+	chr9	114619495	114619820	9	cell-type specific
chr9	114798312	114798335	CAACCACCATGTGGGTGCTG	-	chr9	114798088	114798439	5	cell-type specific
chr9	118830631	118830654	TATCCGAGGAGGCCAGAAGA	-	chr9	118830512	118830910	3	cell-type specific
chr9	118830632	118830654	TATCCGAGGAGGCCAGAAG	-	chr9	118830512	118830910	3	cell-type specific
chr9	119011310	119011333	CCCGTGGAGGCCAGAAGAGG	-	chr9	119011213	119011590	8	cell-type specific
chr9	119052620	119052643	GAGGCAGAGACAACAGGCAG	+	chr9	119052518	119052745	4	cell-type specific
chr9	119701984	119702007	CAGGGCAGAGGGCATAGGGG	-	chr9	119701638	119702210	8	cell-type specific
chr9	119701996	119702018	GGGCAGTGGAGCAGGGCAG	-	chr9	119701638	119702210	8	cell-type specific
chr9	119822767	119822790	GTCGCTTGTCATTTAGGATG	-	chr9	119822735	119823000	5	cell-type specific
chr9	119822821	119822844	GGCGTACTGGGATGTATTGA	+	chr9	119822735	119823000	5	cell-type specific
chr9	21487537	21487560	AGCACAGACTGTTCTTTCAG	-	chr9	21487435	21487672	9	cell-type specific
chr9	21954806	21954829	GTCCTTGTGATAGTTGTGGA	+	chr9	21954818	21954988	0	cell-type specific
chr9	22141874	22141896	TGGGCATCACGCACACATG	+	chr9	22141764	22141929	3	cell-type specific
chr9	22299823	22299844	GAGCCATCCTGTGAGTGC	+	chr9	22299672	22300070	9	cell-type specific
chr9	22484012	22484035	GTGGGGACAGAGGAGGGGGT	-	chr9	22483807	22484076	4	cell-type specific
chr9	22821315	22821338	GAGTCACCTATGTGGATGCT	-	chr9	22821255	22821513	9	cell-type specific
chr9	23411501	23411524	GCAGAAGCAAGACCAAAATG	+	chr9	23411507	23411676	0	cell-type specific
chr9	26827492	26827514	GTGCTACCATGTGGGTACT	-	chr9	26827267	26827539	0	cell-type specific
chr9	36239750	36239773	GGAGGATCAGAAGAAGAAGA	-	chr9	36239632	36239772	0	cell-type specific
chr9	37176077	37176099	TGGTGGGGCAGGATGCTGG	+	chr9	37175820	37176422	1	cell-type specific
chr9	40609551	40609573	CGGAGGATGGGCTGAGTCA	+	chr9	40609379	40609568	6	cell-type specific
chr9	41682636	41682659	CACCAGAGGCGCTGTGGCAA	+	chr9	41682545	41682746	3	cell-type specific
chr9	44187737	44187760	GGTCGTGCTGCTGGCCGTGT	+	chr9	44187559	44187765	6	cell-type specific
chr9	44689544	44689567	GCGGCGGAGGCGGAGGCCAG	-	chr9	44689433	44689644	1	cell-type specific
chr9	53378998	53379021	GGCAAGTCTGCAGTGACAGG	-	chr9	53378857	53379131	3	cell-type specific
chr9	53960728	53960751	CTCCCTCTGATGTTCAGCTC	+	chr9	53960633	53961032	2	cell-type specific
chr9	58217564	58217587	GTGGAAAATTTTCATGACTC	+	chr9	58217512	58217922	8	cell-type specific
chr9	59098231	59098254	GTGGGCAGCTATTGGGTAGC	-	chr9	59098162	59098399	4	cell-type specific
chr9	60000548	60000570	GGGAGTGGATCTGGGGCAG	+	chr9	60000388	60001086	2	cell-type specific
chr9	63752792	63752816	TGAGCTACCTGGGAATGGTGT	-	chr9	63752458	63752898	3	cell-type specific
chr9	68621741	68621764	GGGGGAGTGCAGAGGCCACA	+	chr9	68621655	68621893	5	cell-type specific
chr9	71168343	71168366	GACGTGGAAGCAGGGAGTGG	-	chr9	71168191	71168607	8	cell-type specific
chr9	75316254	75316276	GGGCGCTCTAGGGCGACTT	+	chr9	75316102	75316440	7	cell-type specific
chr9	77975140	77975163	GTGTCATGGCACGAGTGTGG	-	chr9	77974958	77975221	0	cell-type specific
chr9	86004992	86005015	GTGTTGGAATGCCCAGGACT	-	chr9	86004890	86005175	0	cell-type specific
chr9	86555471	86555494	GGCCCTCTTCTGGTCTATGG	+	chr9	86555382	86555595	7	cell-type specific
chr9	87122100	87122122	GGACAGCAGATGAGGGCAT	-	chr9	87122121	87122292	0	cell-type specific
chr9	97115603	97115626	GGGGAGCACTGAGGATGGGG	-	chr9	97115282	97115742	4	cell-type specific
chr9	99239934	99239957	CCTGCTCCTGGTGGGGTCCC	+	chr9	99239614	99240101	6	cell-type specific
chrX	12791616	12791639	GTGCCTGACAAGTCCAGAAG	-	chrX	12791517	12791700	3	cell-type specific
chrX	138712152	138712175	CTTCTGCAGAGCCCTAGGCC	+	chrX	138712116	138712321	0	cell-type specific
chrX	149609515	149609538	GGCGCCCTCTCCTGGCATGC	+	chrX	149609401	149609612	4	cell-type specific
chrX	166178451	166178474	TACCTTCAGAGGACAGAAGA	+	chrX	166178408	166178543	1	cell-type specific
chrX	34425070	34425093	GTATTCCCTGACAGCATGTT	+	chrX	34424778	34425190	8	cell-type specific
chrX	34446735	34446758	TGTGGATGTAGCTCAGTGGT	+	chrX	34446530	34446830	6	cell-type specific
chrX	34446736	34446758	GTGGATGTAGCTCAGTGGT	+	chrX	34446530	34446830	6	cell-type specific
chrX	68384851	68384874	GGGAGGGGTAGAGTAGTGGT	-	chrX	68384531	68384882	7	cell-type specific
chrX	91375434	91375457	GAGGATGAGGCGGGAAGATC	-	chrX	91375088	91375449	1	cell-type specific
chrX	92648027	92648050	GGGAAGGCGGAAAGAATCTG	+	chrX	92647928	92648132	0	cell-type specific
chrX	98700171	98700194	TGACCATCTATAGTGAGATC	-	chrX	98699935	98700315	9	cell-type specific
chr10	115645278	115645301	CCGCTGTCTGTGTGGCTCAC	-	chr10	115644899	115645556	13	common
chr10	116286079	116286102	AGCCTTTGTGCCACGTTCCT	-	chr10	116285787	116286345	15	common
chr10	118029860	118029883	AGTGGCGAAGATCGGAACTG	-	chr10	118029616	118030037	14	common
chr10	119047758	119047781	AGGGCACTGGAGAGCACTGG	-	chr10	119047497	119048131	13	common
chr10	119668969	119668992	GTGCCAGTGACGGCCACAAG	-	chr10	119668867	119669099	15	common
chr10	120864332	120864354	GAGCCCTCATGTGGGTGGT	-	chr10	120864270	120864595	14	common
chr10	121884533	121884555	GAATGATACTGAGGACAGC	-	chr10	121884362	121884629	13	common
chr10	126116512	126116535	GTACAAGGGTGTGCCAGGGT	-	chr10	126116320	126116798	10	common
chr10	126270238	126270261	AAGGCAGAGGGAGGAAGAGA	-	chr10	126270104	126270507	14	common
chr10	126356254	126356277	GTCTGTGAGTGTAAGAGCAG	+	chr10	126356198	126356519	15	common
chr10	126356290	126356312	CTTACCAGCGGTTGCCACG	+	chr10	126356198	126356519	15	common
chr10	126602189	126602212	GCACAGGCTCGGGCTCTGAG	-	chr10	126601919	126602300	15	common
chr10	126779620	126779643	TCCGATTGGGCTTTGGGGAC	-	chr10	126779347	126779682	15	common
chr10	126950057	126950080	CTAGAGGCCGAGCCGCTCTC	-	chr10	126949936	126950214	15	common
chr10	126950060	126950083	GAGAGCGGCTCGGCCTCTAG	+	chr10	126949936	126950214	15	common
chr10	126992992	126993016	GGAACAGGTCAGTGGGGTCAC	+	chr10	126992836	126993239	15	common
chr10	127006743	127006766	GGCCCTTGGAAGGAAGACTG	-	chr10	127006291	127007035	15	common
chr10	127115209	127115232	AGGCAGGCAGGAACGGAAGG	-	chr10	127114960	127115346	13	common
chr10	127956169	127956192	GGTGAGCACAGCCCTGGTTC	-	chr10	127955705	127956281	16	common
chr10	128049879	128049902	CAGTGCATTAGGCTGACCGT	-	chr10	128049760	128050105	13	common
chr10	13149818	13149840	TGGGGGGCAGGGTTGGAGG	-	chr10	13149684	13149883	14	common
chr10	19321663	19321686	CCCTGTATGCTTGCTTTTAT	+	chr10	19321363	19321746	11	common
chr10	23532140	23532163	CACCACCTTGTGGTTTACTG	-	chr10	23531951	23532312	12	common
chr10	23851486	23851509	GCCCAGGTTTCTCTTGCTTT	-	chr10	23851308	23851568	11	common
chr10	29524198	29524221	CTATGAGGTTCTTGTCAGGA	-	chr10	29523893	29524407	10	common
chr10	38595663	38595687	GTACTAGAGTGTTGGAACATC	-	chr10	38595523	38595999	10	common
chr10	38784735	38784758	GCAGAGGGCATCGGCTCCCC	-	chr10	38784648	38784825	14	common
chr10	52143114	52143137	AATACAGCTAGCTGCCTTCG	-	chr10	52142917	52143198	11	common
chr10	58758145	58758169	CACACTGCCATCTGGTGGTGC	+	chr10	58758040	58758769	13	common
chr10	58758430	58758453	GAGGCAGAAGGTGTGAGAAC	+	chr10	58758040	58758769	13	common
chr10	59277716	59277739	GGGCTGCCTGACTTGGGAGC	-	chr10	59277657	59278011	14	common
chr10	59529373	59529396	GATAGTCCTGCCTATGGTTC	-	chr10	59529363	59529613	13	common
chr10	59700557	59700580	GGAGGGAAGGAGGAAAGAGG	+	chr10	59700533	59700974	15	common
chr10	59709443	59709466	TGGGTCCTGGGCAGGGGCCT	-	chr10	59709387	59709682	14	common
chr10	60223276	60223300	CTGCTTTTCTCCAGGCAGCTC	-	chr10	60223164	60223496	15	common
chr10	60238324	60238347	GAAGCACGTGGGGTGAGAGG	+	chr10	60238285	60238512	13	common
chr10	60804466	60804488	AGGGCTGTTGCCTTTTGCT	-	chr10	60804208	60804538	15	common
chr10	61723884	61723906	CGGGGAGCTGGCTGGGCAG	-	chr10	61723825	61724290	13	common
chr10	61724076	61724097	GGAAGCCGGAGGAGGGTC	+	chr10	61723825	61724290	13	common
chr10	62450107	62450130	CTTGGTGGCTGGCCTTGCTT	+	chr10	62450058	62450381	13	common
chr10	66270525	66270548	AGGCAAGGCTCATGGGCGGC	-	chr10	66270370	66270612	13	common
chr10	66998876	66998899	TGGAGGGAGCGCGGCGCTGC	-	chr10	66998672	66999104	14	common
chr10	67461166	67461188	GGGGATGTGGATGGGGTGG	-	chr10	67460682	67461403	15	common
chr10	67476084	67476107	TGGATGCCCAACTGGCCAGC	-	chr10	67475874	67476285	15	common
chr10	68834159	68834182	CTGCACGAACCTCTTAGTGT	+	chr10	68834060	68834617	15	common
chr10	69256007	69256030	GGAGTCACGTTGAAGGACGT	-	chr10	69255870	69256160	13	common
chr10	69308772	69308795	CTGGGATTGACAACAGTGGG	-	chr10	69308603	69308829	13	common
chr10	70789671	70789694	TGGGTCTCTGAGCTTGGGTT	-	chr10	70789574	70789985	15	common
chr10	75098530	75098553	CTGGCACTTCTGCGGCCATC	+	chr10	75098433	75098776	15	common
chr10	75295222	75295245	CCTGGTTCTGCAACAGCTGG	-	chr10	75295045	75295305	14	common
chr10	75854552	75854575	GACCTGCTGTGCCTGGCGGT	-	chr10	75854564	75854961	14	common
chr10	75905649	75905670	GGGCGTTCGTCGACTGGG	+	chr10	75905631	75906021	15	common
chr10	76593449	76593473	GTCAGGACATGGTCTCAGACG	+	chr10	76593352	76593732	15	common
chr10	77066940	77066963	TATGTGTTCTGTGTATGGGT	+	chr10	77066879	77067131	11	common
chr10	77389062	77389085	GTTCCCAGTACCCACTCCAG	+	chr10	77388976	77389205	12	common
chr10	77875570	77875593	CATCGAGGCCAGGTCGCAGC	-	chr10	77875582	77876079	15	common
chr10	79355628	79355651	CCTGTTGCATACACACCTGA	+	chr10	79355550	79355934	15	common
chr10	79421022	79421045	GCGGGGGAACAGGGAGGACA	-	chr10	79420892	79421218	15	common
chr10	79454514	79454537	GCCGTTCTGACATGGGTGCT	+	chr10	79454268	79454687	10	common
chr10	79832994	79833017	AGGGCTGCAGTGATGGGGGA	-	chr10	79832753	79833018	10	common
chr10	79839026	79839050	GGCAGAGGCTCAGCTCACTGT	+	chr10	79838990	79839320	15	common
chr10	79986193	79986216	GCAGCTGTAACTCCAGCTCC	+	chr10	79986062	79986335	10	common
chr10	80343847	80343870	CTTTAATCCCAGCCCCTAGG	-	chr10	80343672	80344333	15	common
chr10	80343987	80344010	GAAGGTTTGAGCCATCATGT	-	chr10	80343672	80344333	15	common
chr10	80409644	80409667	GTACCCGCAGAGGCCAGAGG	+	chr10	80409493	80409851	12	common
chr10	80409660	80409683	GAGGGGGCGTCAGATTCCCA	+	chr10	80409493	80409851	12	common
chr10	80485718	80485741	TGCCTTCGGAGGCCAGAAGG	-	chr10	80485487	80485856	11	common
chr10	80513634	80513657	GGGCTGGGGAGCTGAAGAGA	-	chr10	80513267	80513652	14	common
chr10	80536383	80536406	GTTCTCACGATGGCCAGAAG	+	chr10	80536003	80536604	15	common
chr10	80635977	80635999	GTTGGGTCGTCCTGCCGGC	+	chr10	80635720	80636188	14	common
chr10	80637939	80637962	CAGTGCCGCGTGTGTCCAGC	-	chr10	80637830	80638125	15	common
chr10	80752143	80752166	CTGTGCTGAGATGAAGGTTC	-	chr10	80752041	80752353	15	common
chr10	80767702	80767725	AGCTAGGCTCTAGTGTCCGG	+	chr10	80767618	80767940	15	common
chr10	80813575	80813598	CCTGGCCGTACTGCAGGGGC	-	chr10	80813495	80813931	14	common
chr10	80857778	80857801	GTGAGTGTCAGGGGAAGGTG	-	chr10	80857715	80858348	15	common
chr10	80858020	80858043	GAACGGGAGACCCTTGGATG	-	chr10	80857715	80858348	15	common
chr10	81016208	81016231	GGATACTCCCACAGAGGATG	-	chr10	81016003	81016363	15	common
chr10	81027654	81027677	GGTAAGCAAGCCACCAGCAG	+	chr10	81027428	81027781	15	common
chr10	82714386	82714409	AGCTAGAGAGATGGTTCAGT	-	chr10	82714074	82714457	11	common
chr10	82714422	82714445	GTTTCTCTGTCTCGGGGCAA	+	chr10	82714074	82714457	11	common
chr10	83913601	83913624	AGTACTCAGCCGCCTTTACC	+	chr10	83913490	83914204	14	common
chr10	83913804	83913827	AGGGCAGGGGGCAGGTAAGG	+	chr10	83913490	83914204	14	common
chr10	83976985	83977008	GGCAGTGTGGTGCAGAGGAC	-	chr10	83976891	83977042	15	common
chr10	85114761	85114784	GGAACAGCAGGCAAGGGGGC	-	chr10	85114409	85114944	13	common
chr10	8512343	8512366	CAGGCCATCTGGGGCAATGC	-	chr10	8512197	8512462	11	common
chr10	85484630	85484653	CCTAGAGCCTTCCGCTCGAG	-	chr10	85484428	85484767	14	common
chr10	85758995	85759018	GGGGTGCGGGTGCCTTGAGT	-	chr10	85758991	85759460	15	common
chr10	87839701	87839724	GGGCAGTAGAGGCATATTGC	+	chr10	87839515	87839843	13	common
chr10	92746237	92746260	CTTGCATGCAGTACCCATGG	-	chr10	92745981	92746363	13	common
chr1	108634841	108634864	AGGGGTCAGGGGTCAGAAGT	+	chr1	108634715	108635159	11	common
chr1	108857892	108857915	GTGGCTAATATGTTAGCTCG	-	chr1	108857689	108857928	10	common
chr11	100159688	100159711	GGGACTTTGGGGCTGGCCCA	-	chr11	100159571	100159917	15	common
chr11	100224921	100224945	TAGGGGATGAAGGCTCAGAGC	-	chr11	100224545	100224955	15	common
chr11	100488472	100488496	GTAGTGTCCATCCCTCCTGGT	+	chr11	100488201	100488522	15	common
chr11	100556433	100556456	CAGTACCTAGGTCAAACTGC	-	chr11	100556253	100556616	15	common
chr11	100623236	100623258	GTTACCGTTGGCCTGAAGG	+	chr11	100622834	100623394	16	common
chr11	100698833	100698855	GGTTTGTGAGCTGTCACGT	+	chr11	100698693	100699105	14	common
chr11	100755013	100755036	AGCGAGAGCAGCAAAGAAGG	-	chr11	100754564	100755178	15	common
chr11	100755058	100755080	GGGGGCTTTGTGCTTAGGA	+	chr11	100754564	100755178	15	common
chr11	100755086	100755109	GGGTTTCATCAGCAAGGAGC	-	chr11	100754564	100755178	15	common
chr11	100820997	100821020	GTGTAAGTTAGGGCACCAGA	-	chr11	100820815	100821031	12	common
chr11	101035610	101035633	CGCTGATACAGGCTAGGAAG	+	chr11	101035135	101035622	15	common
chr11	101789943	101789965	GGACAGAAGATTCCAGCAG	-	chr11	101789755	101790052	14	common
chr11	102109871	102109894	AGTGAGTTAGAGGGCAGCCT	+	chr11	102109843	102110247	15	common
chr11	102762251	102762274	GTGGGAATCAAGACTGGCTG	+	chr11	102762104	102762491	15	common
chr11	103030179	103030202	GGCAACGCAGACTTACGGAA	+	chr11	103030037	103030364	15	common
chr11	103094325	103094348	GGGGACACAGCTGCCTGCTC	+	chr11	103094310	103094662	15	common
chr11	103221685	103221708	AGTGGCCCGCGCTGCCGAGG	+	chr11	103221593	103221838	14	common
chr11	103620143	103620165	TGGGAGGGACAGGAAGTGG	+	chr11	103620133	103620419	15	common
chr11	104092844	104092867	GTGGCGGCGGCGGCAGAAGG	-	chr11	104092375	104092851	14	common
chr11	104177236	104177259	TAGACAGCAGCCTGTGTTCT	+	chr11	104177070	104177401	15	common
chr11	105209202	105209224	GGCAGCTGTCCTCAGGGCT	+	chr11	105208977	105209460	15	common
chr11	105888254	105888277	GCGCCACCTCCTGGTAGCGT	+	chr11	105888233	105888536	15	common
chr11	106876091	106876113	GAGACAGAAGGGAAGGGCT	-	chr11	106875633	106876663	11	common
chr11	106876221	106876244	CAACTCAAGACACAGGCACG	-	chr11	106875633	106876663	11	common
chr11	106876458	106876481	GGCGCCCTCTGTTGGGGATG	-	chr11	106875633	106876663	11	common
chr11	106880118	106880141	CAGCAGGGGGCGTGCCTCCT	+	chr11	106879964	106880226	15	common
chr11	106993632	106993655	AGGAGCGAGATGGGTAGCGT	+	chr11	106993400	106993900	14	common
chr11	107050681	107050702	GGCGGGCGGAAGAGGAGG	+	chr11	107050586	107050848	15	common
chr11	107330624	107330647	CCTTTGCTGACCGCCTGGCT	-	chr11	107330412	107330679	15	common
chr11	107370994	107371017	GTGCAAGTGATGTGAGGGGT	+	chr11	107371000	107371264	12	common
chr11	113724914	113724937	AAGGATCTGACGCCCTCTGG	+	chr11	113724794	113725109	14	common
chr11	114384944	114384966	GAGACAAGCAGCTAGGATG	+	chr11	114384679	114385115	13	common
chr11	114497856	114497879	GGAAGGCAAGTCGTTGCTGC	-	chr11	114497645	114497974	15	common
chr11	114529378	114529401	GGCATCGGATCCAGGGGAAC	-	chr11	114529231	114529485	11	common
chr11	114534279	114534303	AGCACTCAGGAGGTGGGGGCA	-	chr11	114533991	114534386	14	common
chr11	114606587	114606610	CTTTACCGCGATCTTCCAGC	+	chr11	114606316	114606696	15	common
chr11	115126871	115126893	GGTCTGAAGGCCTAGAGCT	-	chr11	115126633	115127049	13	common
chr11	115584065	115584088	GGTAGGTGTCGCTCTAGACC	+	chr11	115583742	115584218	15	common
chr11	115742615	115742638	GGTAGTTGTGGGGACCAGCT	-	chr11	115742321	115742691	14	common
chr11	116076572	116076595	GTGGCTTGTGAGGGATGTGA	+	chr11	116076517	116076886	11	common
chr11	116156142	116156164	GGCTGCTGTGCCCTGAGGA	+	chr11	116155799	116156219	14	common
chr11	116532597	116532620	GAAGTCCAGGGAGAGTCCCA	-	chr11	116532370	116532906	15	common
chr11	116918999	116919022	GCGCCATCTGGAGGCTGTGA	+	chr11	116918676	116919194	15	common
chr11	116933542	116933565	GTGAGTCACAGACCAGGACT	+	chr11	116933402	116933794	15	common
chr11	116943190	116943213	GGGAGGTGCAGCGGCAGGGT	+	chr11	116942872	116943201	14	common
chr11	11712103	11712126	CTCAGGTTTTCACTGATTCC	-	chr11	11711966	11712264	15	common
chr11	117174494	117174517	GACCACTACCCGCTGCCAGG	-	chr11	117174231	117174682	15	common
chr11	11720301	11720324	GGAAGGTAGTGCTGGATGCC	-	chr11	11720182	11720455	12	common
chr11	117251319	117251342	GTGCGGATGAACTGGTCCCA	+	chr11	117251125	117251504	15	common
chr11	117732090	117732113	TCTGTTCAGTCGTTGCCCTT	+	chr11	117732041	117732232	15	common
chr11	117732196	117732219	GGGAAAGAGAGATGGAAGGG	-	chr11	117732041	117732232	15	common
chr11	117883247	117883270	CCTCATGTGGCACAGCCAGC	-	chr11	117883121	117883461	15	common
chr11	118216688	118216711	CTCCTCCTCTCGGTGGCTGG	+	chr11	118216575	118217257	12	common
chr11	118599846	118599869	CAGGAGGTGAGGGTGAGAGG	-	chr11	118599670	118600222	15	common
chr11	118884087	118884108	GGCGAAGCGGGGAGCACG	-	chr11	118883949	118884217	14	common
chr11	119224840	119224863	TGGACTGTCACAACAGGTGA	+	chr11	119224841	119225296	15	common
chr11	119224997	119225020	GGGGCGCTGTTGCTGCCATC	+	chr11	119224841	119225296	15	common
chr11	119225239	119225262	GTGCCCTCTTCTGGCTCCGT	-	chr11	119224841	119225296	15	common
chr11	119631172	119631195	TGTGCAGCCGAGCTCTCCTC	+	chr11	119630967	119631461	13	common
chr11	119891679	119891701	GCCATCTGGTGGCAGAAGT	-	chr11	119891484	119891820	15	common
chr11	119926674	119926697	GTGCTCAGCACTGCAGGTAG	-	chr11	119926543	119926932	15	common
chr11	119982347	119982370	CAGCTAGTGCGAGGATGCGA	-	chr11	119982048	119982402	14	common
chr11	120169126	120169149	CAAGAAGGCAGCAACGGGGG	+	chr11	120168937	120169167	15	common
chr11	120557997	120558020	GTATACGTGTATAACTGTGT	+	chr11	120557950	120558332	12	common
chr11	120558253	120558276	CAACTTGTTCCACCTCACCT	+	chr11	120557950	120558332	12	common
chr11	12479270	12479293	ATGGCCTCTTCCTTCTCAAC	+	chr11	12479099	12479528	11	common
chr11	12479390	12479413	CCTGCCTCGCTCGGTTTCTG	-	chr11	12479099	12479528	11	common
chr1	120394984	120395006	CTCGGGGTTGAGGATAGGG	+	chr1	120394961	120395221	15	common
chr1	120394986	120395009	CGGGGTTGAGGATAGGGAGG	+	chr1	120394961	120395221	15	common
chr1	120984254	120984277	CCCTGGGTACGTATGTATGG	-	chr1	120984113	120984381	13	common
chr1	121381193	121381217	CACAAAACCTCTCTGAGATGT	+	chr1	121381147	121381403	14	common
chr1	121816190	121816213	CGAGGATGTAGCTCAGTTGG	-	chr1	121815748	121816225	13	common
chr1	121909876	121909897	GCAGAGCTGGGACTGTGG	-	chr1	121909742	121910276	15	common
chr1	121909876	121909898	GGCAGAGCTGGGACTGTGG	-	chr1	121909742	121910276	15	common
chr1	122365628	122365651	CGGCCTCCAGGCACTGGCCT	-	chr1	122365635	122365801	11	common
chr1	122365669	122365692	CCCTCGTGCTCGGAAAGTGA	+	chr1	122365635	122365801	11	common
chr1	123315855	123315878	TGCCTATCAGAGTGGCCACC	-	chr1	123315801	123315975	12	common
chr1	127503973	127503996	AAAGTCAGTTGGAGGAGGGC	+	chr1	127503837	127504317	15	common
chr11	29073253	29073276	CGGCGAGGTGAGCGAGGAGG	+	chr11	29073188	29073616	14	common
chr1	129135831	129135854	GTTAGCGCACCAGTCAGGGA	-	chr1	129135299	129135857	13	common
chr1	129384040	129384063	GGGGTCTCACATGGCTCCTT	-	chr1	129383791	129384072	15	common
chr11	29593822	29593843	GGGAGGCGGGCAGAAGGG	+	chr11	29593739	29593999	14	common
chr11	31538270	31538293	CCAACTCTGGATGCCACTCT	-	chr11	31538055	31538470	15	common
chr11	32138620	32138643	CTTTGAGCAAACTGAGGTCC	+	chr11	32138591	32139017	15	common
chr11	32221354	32221377	CTCAGCTGTTTATGACTACC	+	chr11	32221227	32221493	15	common
chr11	32242918	32242941	CTGGTGTAAGCATGCACTGA	-	chr11	32242778	32243184	15	common
chr1	132530764	132530787	TGGCGCCCTCGTGTGGTACG	+	chr1	132530462	132531005	15	common
chr11	32929142	32929164	CCCTTGTTAGCTGCAGCAC	-	chr11	32928925	32929202	13	common
chr11	3309374	3309397	GTCGCAACACAGGGGACCCT	+	chr11	3309147	3309517	15	common
chr1	133497258	133497281	GGGGTGTGGGGTGAGGTGGT	+	chr1	133496951	133497422	10	common
chr11	33902409	33902432	GCTCCCTCTAGTGACGAAGT	-	chr11	33902064	33902705	12	common
chr11	33973920	33973943	GGCGCAGCGCTGTTTGCAGG	-	chr11	33973819	33974178	14	common
chr11	34049385	34049408	GGCAAGAGGGTGCAAAATGG	-	chr11	34049165	34049652	14	common
chr1	134052492	134052514	GCCATGGAGCAGCGTTCTC	-	chr1	134052368	134052738	15	common
chr1	134108680	134108703	GTAGGTATGGGGTTGTGAGG	+	chr1	134108469	134109074	15	common
chr11	34129061	34129083	GTGCCATGGGGTAGGGCGT	+	chr11	34129075	34129285	14	common
chr1	134264198	134264220	GGGACAGAAAGCAGAGGGC	-	chr1	134264143	134264552	15	common
chr1	134420719	134420742	GTAGTTGTGAGCCACCCTGT	+	chr1	134420331	134421009	12	common
chr1	134422516	134422537	GCCACTCAGGCTGAGCTG	+	chr1	134422493	134422741	13	common
chr1	135792851	135792874	GGGGAGGCTGAGGCAGGACC	+	chr1	135792862	135793290	15	common
chr1	135792856	135792879	GGCTGAGGCAGGACCAGGCT	+	chr1	135792862	135793290	15	common
chr1	13580074	13580097	TGGGCCACCAGGTGCGGCCA	-	chr1	13580016	13580230	14	common
chr1	136421008	136421031	GGGCCTGCTTTACTTCATGT	+	chr1	136421008	136421312	11	common
chr1	136886132	136886155	GCACCCTCTAGTGGTGGATG	-	chr1	136885921	136886382	13	common
chr1	137002676	137002698	CTGGCAACCAGCTGTGCGG	-	chr1	137002592	137002799	15	common
chr1	137567373	137567395	CCTCTCTCCTCCAAGGGTT	-	chr1	137567012	137567404	15	common
chr1	137568238	137568262	TGGATGGATGGCTCAATGGTT	-	chr1	137567974	137568302	11	common
chr1	137616309	137616332	GGCGGGGCTTCATCTGGTGC	-	chr1	137616124	137616360	15	common
chr1	137649634	137649657	GTGCCTTTGGGGTCCAGAGG	+	chr1	137649569	137649865	15	common
chr1	13779452	13779475	CTGCTGGCAGCTGTGATCTC	-	chr1	13779311	13779664	15	common
chr1	138012941	138012964	CTTAGGTTTGTGGCCGATGT	-	chr1	138012526	138013426	15	common
chr1	138109623	138109646	AGGAGGAGAGGGGTGTTGGA	-	chr1	138109413	138109767	15	common
chr1	138109624	138109646	AGGAGGAGAGGGGTGTTGG	-	chr1	138109413	138109767	15	common
chr1	138109640	138109663	GGAGAGGGAGGGGTAGTAGG	-	chr1	138109413	138109767	15	common
chr1	138109710	138109733	TGGAAAAACAGGCGTTCCTT	-	chr1	138109413	138109767	15	common
chr1	138636237	138636260	AGGTTTGTGAGTTGCTGTGT	-	chr1	138636136	138636402	14	common
chr1	139123471	139123494	GTTCTGAGGAGGTCAGGAGA	+	chr1	139123116	139123603	10	common
chr1	139220579	139220602	GGACAGGGTCTGTGAGGACA	+	chr1	139220505	139220942	13	common
chr1	139220603	139220626	CTGTGAGGGCTGAGGCTGTG	+	chr1	139220505	139220942	13	common
chr11	4120693	4120716	CTCTGAATGGGATGCACCGT	-	chr11	4120512	4120829	15	common
chr11	4120694	4120716	CTCTGAATGGGATGCACCG	-	chr11	4120512	4120829	15	common
chr11	4158854	4158876	CTGGGGTGCAGGATGGGGG	-	chr11	4158507	4159128	15	common
chr11	4158858	4158881	GGTGTCTGGGGTGCAGGATG	-	chr11	4158507	4159128	15	common
chr11	45758567	45758590	GGGGGCGTGGCGCAAGGCAG	+	chr11	45758366	45758712	15	common
chr11	46090426	46090448	GTTTGCTCCGCCTGACCAG	-	chr11	46090077	46090537	15	common
chr11	4743620	4743643	CATGCATGTAGTGCCCATGG	+	chr11	4743276	4743795	13	common
chr11	4800621	4800643	CGAGGCCAGAAGAGGGCGC	+	chr11	4800335	4800808	12	common
chr11	48585093	48585116	TGGGCATTCCCTCATGCTCC	-	chr11	48585082	48585458	13	common
chr11	4959889	4959912	CCACTCTAGTTCGTAGGGGC	+	chr11	4959891	4960230	15	common
chr11	49660135	49660158	CGTGGCTGGAGGCTGGGTGT	-	chr11	49659923	49660212	15	common
chr11	51353380	51353403	GAACGCCGGTGAGCACTAGG	-	chr11	51353152	51353530	15	common
chr11	51631438	51631461	GCAAGAGCAGACCGGCCAGC	+	chr11	51630989	51631681	15	common
chr11	51631441	51631464	AGAGCAGACCGGCCAGCAGG	+	chr11	51630989	51631681	15	common
chr11	51633648	51633671	GCTGGATGCCCTGGAACTGG	+	chr11	51633547	51633886	14	common
chr11	52846071	52846094	GGCAGGCCCTCCCGCTGTCC	-	chr11	52845836	52846263	15	common
chr1	153308582	153308605	GTTGGTGGCGCTGTTTAGGG	+	chr1	153308416	153308711	10	common
chr1	153330894	153330917	CCCAGCACTCCAGAGACAGG	+	chr1	153330589	153331060	11	common
chr1	153331049	153331072	GGGGCAGGACATCATGGTGG	-	chr1	153330589	153331060	11	common
chr1	153331051	153331072	GGGGCAGGACATCATGGT	-	chr1	153330589	153331060	11	common
chr11	53549308	53549330	GGTAGGGTGAGTGCGGCGG	+	chr11	53549217	53549457	15	common
chr11	54801600	54801623	GTTCTCAGCACCTGGTCAGA	+	chr11	54801522	54801722	13	common
chr1	154939609	154939632	GGCGGGGTGGGGTGAGTCAG	+	chr1	154939430	154939760	13	common
chr11	54978319	54978342	TGTGTGTCTGGTGCCTGAAG	-	chr11	54978086	54978549	14	common
chr1	155327706	155327730	GTGGCCTCTTGTGGCCTCCGC	+	chr1	155327489	155327813	12	common
chr1	155327710	155327733	GTACCTGCGGAGGCCACAAG	-	chr1	155327489	155327813	12	common
chr11	55384836	55384859	CAGTCCACCACGCCCTCTGG	-	chr11	55384633	55385025	11	common
chr1	155589729	155589752	ATTGCTCAGGTGTGTCCACC	-	chr1	155589358	155589950	13	common
chr1	156128783	156128806	CAGGGGCCAGTCCTGATGTA	-	chr1	156128621	156128872	13	common
chr1	156128784	156128807	ACAGGGGCCAGTCCTGATGT	-	chr1	156128621	156128872	13	common
chr11	57633649	57633671	AGGCAGTCTGGCCACCAGG	+	chr11	57633422	57633860	15	common
chr1	158561271	158561294	GAACCCAGAGAGGCCAGAAG	+	chr1	158561214	158561436	13	common
chr11	58741760	58741783	CAGAAGGCCACCAGCTACTG	-	chr11	58741384	58741873	15	common
chr11	59032734	59032757	CTTAACTCCATCCAGTTCCA	+	chr11	59032602	59032910	11	common
chr11	59121377	59121400	AGCCCCTCGGGTCGCAACCC	+	chr11	59121335	59121573	13	common
chr1	159675823	159675846	GGAAGGGGACAGGGAAGGGA	-	chr1	159675667	159676121	11	common
chr11	60960132	60960155	GTCCGCCTCACTGATGACGT	-	chr11	60960067	60960419	11	common
chr11	60987916	60987939	GGGGGCTAGAGGAAGCATCA	-	chr11	60987646	60988131	13	common
chr11	60988054	60988077	GTGGGGCCGAGGAATGGGCA	-	chr11	60987646	60988131	13	common
chr11	61007090	61007113	AGGACCTCTTGCGATGCACT	+	chr11	61006930	61007301	15	common
chr11	61201553	61201577	TAGCACTCAGTGGGCCAAGGC	+	chr11	61201545	61201914	10	common
chr11	61479647	61479670	GCAATCGCAGGGCTGAGCTG	-	chr11	61479432	61479793	15	common
chr1	161841328	161841351	GCTGTAGTAGCTAACACCTG	+	chr1	161841011	161841475	10	common
chr11	62388900	62388923	CTTGTTCTCCCTGGCAGTGC	+	chr11	62388746	62389519	15	common
chr11	62570514	62570536	CCAGGCCGTGCACTCACGA	+	chr11	62570325	62570713	15	common
chr11	6302895	6302918	CCCCTGGTGGCCACAGGTGC	-	chr11	6302448	6303070	15	common
chr11	6336683	6336704	GCAGGGTGGTGATGGCGG	+	chr11	6336517	6336810	15	common
chr1	166245617	166245641	GTGCCTGTGGAGACCAGCAGG	-	chr1	166245453	166245924	15	common
chr1	166245618	166245641	GTGCCTGTGGAGACCAGCAG	-	chr1	166245453	166245924	15	common
chr1	166246964	166246987	CTGGTTGTGTGACTCAGCTT	+	chr1	166246945	166247178	12	common
chr11	6669077	6669100	AGACCCTCAGCTCTCCAAGG	+	chr11	6668869	6669353	15	common
chr11	66713056	66713079	CGCTGATCCACTGTAGTCGT	-	chr11	66712785	66713249	13	common
chr11	67241856	67241879	CATTCTCAGCCTTAGCCAGC	+	chr11	67241729	67241925	13	common
chr11	67466009	67466032	GTGGTCTGGTTACCAGCAGA	+	chr11	67465757	67466276	14	common
chr1	167585323	167585346	GGGGAGTGGCGGTGGGTGGT	+	chr1	167585173	167585527	11	common
chr1	167609505	167609528	GATCCCAGCACCCACATGGG	+	chr1	167609159	167610073	12	common
chr1	168083753	168083775	CTGAGTGTGTGGTGTGCGT	-	chr1	168083564	168083902	15	common
chr11	68231502	68231525	GGCGGATCAGCAGGTCTTAG	-	chr11	68231403	68231785	16	common
chr11	68231571	68231594	AGCTGCTGTCGTCCACCAGA	+	chr11	68231403	68231785	16	common
chr11	68379846	68379869	CTCGAGGCTGCTGTCTGTGG	-	chr11	68379705	68380270	15	common
chr11	68621559	68621582	CTGCCCTCTACTGGCCTCCG	+	chr11	68621428	68621862	15	common
chr11	68621559	68621583	CTGCCCTCTACTGGCCTCCGT	+	chr11	68621428	68621862	15	common
chr11	68714922	68714945	GTCCTGACGTCATCCCTCGG	-	chr11	68714839	68715077	15	common
chr11	68715011	68715033	GCGAAAGGGGAGAGGAGGT	-	chr11	68714839	68715077	15	common
chr11	68715015	68715039	CTCGGAGCGAAAGGGGAGAGG	-	chr11	68714839	68715077	15	common
chr11	68947268	68947291	CGCACCCTTCCCAGAATGCC	-	chr11	68947168	68947670	11	common
chr11	69072047	69072070	GCCAGCATTCACTCACGGGT	-	chr11	69071338	69072133	15	common
chr11	69085977	69086000	CCTGAGCCTTAACCAGTAGG	+	chr11	69085840	69086210	14	common
chr1	169236720	169236743	CTGGAATCGTGACCATGCCT	+	chr1	169236478	169236950	14	common
chr1	169267743	169267767	GTTCCCGTCAGAGCCACTGGG	-	chr1	169267617	169268186	15	common
chr11	69388835	69388858	GTTACCCTTCTAGAGGACCG	+	chr11	69388805	69389070	10	common
chr11	69468953	69468975	CCCAGGAGCAGGAGGCCGG	+	chr11	69468914	69469204	15	common
chr11	69668977	69669000	GTCTGGTTTGAGGCAGGTCT	-	chr11	69668932	69669331	12	common
chr11	69668978	69669000	GTCTGGTTTGAGGCAGGTC	-	chr11	69668932	69669331	12	common
chr11	70796638	70796662	GCAAGGGAGACATGGTGGTCA	-	chr11	70796355	70796721	15	common
chr1	171848321	171848342	CCCCTGACTCCCTCTAGG	-	chr1	171848000	171848386	14	common
chr11	72885495	72885518	GTGCCTGTGGCGGCCAGGAG	+	chr11	72885468	72885608	12	common
chr11	73095343	73095366	GGGGGAGAGAGGAGGAGGAG	+	chr11	73095042	73095469	12	common
chr1	173168839	173168861	CGACCTGGAGGAGTGCACC	-	chr1	173168733	173168917	15	common
chr1	173494560	173494582	CAGCACTGTGTGGCAGGGC	+	chr1	173494436	173494812	14	common
chr1	173494663	173494686	GACACCAGGAGTTTTGGAGA	+	chr1	173494436	173494812	14	common
chr1	173942386	173942409	AGGAGGGCAGCGGTGGTGGT	-	chr1	173942153	173942417	15	common
chr1	173942387	173942409	AGGAGGGCAGCGGTGGTGG	-	chr1	173942153	173942417	15	common
chr1	173942406	173942427	GTTGGCGCAGGCTGGAGT	-	chr1	173942153	173942417	15	common
chr1	174050036	174050059	GCAGCCTGTGCATATGATCT	+	chr1	174049611	174050140	13	common
chr11	74190513	74190536	CACAGGTTCAGCAGGCATGG	+	chr11	74190395	74190655	12	common
chr1	174239967	174239990	GACTGAAGTCTGCCCACATG	+	chr1	174239696	174240559	15	common
chr1	174254912	174254935	GTGAAGGAGGAGAGGGGAGT	+	chr1	174254867	174255194	15	common
chr11	74279316	74279339	GGTGAGCTCAGCAGGGCACA	+	chr11	74279001	74279429	12	common
chr11	74340183	74340206	CTGTGTTGCTGCCCAGGAGG	-	chr11	74340020	74340371	15	common
chr11	74340189	74340212	GTGTAACTGTGTTGCTGCCC	-	chr11	74340020	74340371	15	common
chr11	74340348	74340371	CGAGAGGAGAGTTGGTGTGC	-	chr11	74340020	74340371	15	common
chr1	174420640	174420661	CCGGGGATGGGTCGGAGG	+	chr1	174420423	174420882	15	common
chr1	174459043	174459066	CCAGGTGGCAGTAGCGCTCA	+	chr1	174458758	174459405	15	common
chr11	74661558	74661581	GTCCTGTCTGCTGGTGCCGC	+	chr11	74661433	74661766	15	common
chr11	74737824	74737847	GCGCCCTCTTCTGGTGCGTC	-	chr11	74737693	74738061	10	common
chr11	74978948	74978971	AGCACCTCTGCCGCCTTGTC	+	chr11	74978866	74979196	14	common
chr11	75045374	75045397	AGCGGGAGGAACGGGAAAGA	-	chr11	75045325	75045577	15	common
chr11	75432669	75432692	GGGAGGTGAGGAGGAGGAAA	-	chr11	75432627	75433010	14	common
chr11	76269964	76269987	CAGGACTGTAGCTGAGGACT	+	chr11	76269768	76270045	15	common
chr11	76269972	76269995	TAGCTGAGGACTGGGAAATG	+	chr11	76269768	76270045	15	common
chr11	76459785	76459808	GGGAGTTTGAGTTGGTCTTT	-	chr11	76459503	76459862	16	common
chr11	77311130	77311153	GGGGCGTGGTTCTCATTGTT	+	chr11	77311087	77311279	12	common
chr11	77443942	77443965	GTGCGGTGAGGTGGGAGTGG	-	chr11	77443826	77444197	15	common
chr11	77636401	77636424	ACAGCCACGTGTGCCTGTGG	-	chr11	77636338	77636680	15	common
chr11	78160819	78160842	GCCCCCTGTTTCGGGTGAGT	+	chr11	78160837	78161188	14	common
chr11	78169156	78169177	CAGGGTCTGGCCAGCAGG	+	chr11	78169062	78169294	15	common
chr11	78174255	78174278	GTGAGCTGGGAGCTGGGAGC	-	chr11	78173788	78174270	15	common
chr11	79109894	79109917	GGACTTCTCCTGACCTCTGC	+	chr11	79109723	79110108	12	common
chr11	79212059	79212082	CACAGTGCAGAAGTTGTATG	+	chr11	79211955	79212185	13	common
chr11	79500392	79500415	GGCAGAGGAAGCCACAGAGG	+	chr11	79500292	79500812	15	common
chr1	181406805	181406828	CTCTGCCAACAGCCACAAGG	+	chr1	181406781	181406920	10	common
chr1	181437214	181437237	TACACCTGCTGGCCAGAAGG	+	chr1	181437190	181437366	12	common
chr1	181563583	181563607	TGAAGTGGCAGTAAAGAGCAC	+	chr1	181563483	181563818	14	common
chr1	181777950	181777973	GGACGAGCAGCCCTGAAGTT	-	chr1	181777851	181778176	15	common
chr1	181777987	181778010	TGAGAACTGCAGGTCTGCCT	-	chr1	181777851	181778176	15	common
chr11	81809821	81809844	TGACAGCTCTGTGTGCTCTC	-	chr11	81809719	81810034	15	common
chr11	81988494	81988517	CCTGGCATTCATCAGCTACC	+	chr11	81988415	81988660	15	common
chr11	81988573	81988596	GGCTCACCAACGTGGTGTGT	-	chr11	81988415	81988660	15	common
chr1	182160874	182160897	ACTCTTGTGAGCTGCCATGT	-	chr1	182160775	182161141	13	common
chr1	182160875	182160898	GACTCTTGTGAGCTGCCATG	-	chr1	182160775	182161141	13	common
chr11	82704124	82704147	CCGGAAGCGTCGGCCGGAGG	-	chr11	82704079	82704285	15	common
chr11	82704125	82704147	CCGGAAGCGTCGGCCGGAG	-	chr11	82704079	82704285	15	common
chr11	82881968	82881990	CACCTGTAACGCCAGTTCT	+	chr11	82881763	82882172	10	common
chr11	83254330	83254353	CCCTGACCTGGGTAAGGCAG	+	chr11	83254312	83254595	15	common
chr11	83254561	83254585	GTCAGGAGGGCTGTAGGTGCT	-	chr11	83254312	83254595	15	common
chr1	184054765	184054788	ATCCCCTCCAGCCCTGCAGG	+	chr1	184054502	184054926	15	common
chr1	184079878	184079901	GTCTGATGTGATTGGTGCTA	+	chr1	184079698	184080431	10	common
chr11	8434781	8434804	ATGTTACCATGCCTGGGAGT	-	chr11	8434754	8435265	13	common
chr1	184420063	184420086	CTGCTAGCACGTGGCTGTCC	-	chr1	184419533	184420293	15	common
chr1	184484226	184484249	ACAGAGGTGACGCTAAGCCA	+	chr1	184484188	184484507	15	common
chr1	184484366	184484389	TGGGGGCATGTGCTGCAGTG	+	chr1	184484188	184484507	15	common
chr1	184588025	184588048	TCTGCCGCTTTGGTTTCTGT	+	chr1	184588009	184588535	13	common
chr1	184921247	184921269	GGTCTTGCAGCGCCACCTG	-	chr1	184920873	184921497	15	common
chr11	84996686	84996708	CGCCACCTACAGGAACTGT	+	chr11	84996535	84996851	15	common
chr11	85296463	85296486	CACTATGTGTTTCTCCACGT	-	chr11	85296267	85296526	13	common
chr1	185523304	185523327	CTACCATACGGGTGCTGGAT	+	chr1	185523246	185523551	12	common
chr11	85656893	85656916	CCTCGGCCTGCGGACACCAG	+	chr11	85656789	85656997	15	common
chr11	86171821	86171844	CGTGACCTCGCGGCGGCCAA	-	chr11	86171842	86172085	15	common
chr1	186219173	186219197	GGTGCCGACACCAGGGAAGTG	+	chr1	186219050	186219423	15	common
chr1	186561976	186561999	CCCAACAGTGTTGCTGGCGT	-	chr1	186561909	186562166	14	common
chr11	87476072	87476095	GTGCGTGCACCAAGAGGAGG	+	chr11	87475879	87476164	15	common
chr11	88065983	88066006	AGGAGCTGAGGCTGGGAGCT	-	chr11	88065643	88066162	15	common
chr11	88065984	88066006	AGGAGCTGAGGCTGGGAGC	-	chr11	88065643	88066162	15	common
chr11	88684499	88684520	TGGGATGAGGCAAAGGGA	+	chr11	88684387	88684862	13	common
chr11	88710055	88710078	CAAAGCCAAGGTCTGAGTGA	+	chr11	88709976	88710291	15	common
chr11	88900817	88900840	GTCCATGGCTGCCCATTAGA	-	chr11	88900638	88901010	15	common
chr11	90031491	90031513	GTGCCATACTGGCCAGGAG	-	chr11	90031288	90031635	14	common
chr11	90559069	90559092	GGAGGGGACGCCCTTGGTCC	+	chr11	90558686	90559247	13	common
chr11	90559070	90559093	GAGGGGACGCCCTTGGTCCT	+	chr11	90558686	90559247	13	common
chr1	191707090	191707113	ACCAGACATGTTCTGGGGGA	+	chr1	191706866	191707169	15	common
chr1	191711314	191711337	GGGGACATCAGTACAGGGCT	+	chr1	191711322	191711691	15	common
chr1	192832854	192832877	GGGAGCTGGAAATTGAACCT	+	chr1	192832409	192832943	10	common
chr1	192950087	192950110	CAACCCAGGAGGCTTGGGAC	-	chr1	192949929	192950206	15	common
chr1	193112874	193112897	GGCGCTATTGTGAGGCTCTG	-	chr1	193112489	193113180	15	common
chr1	193399864	193399887	GGAGTGGCGCCACCTAGTGG	+	chr1	193399710	193400217	15	common
chr1	194422477	194422500	TGATAACCAAGAAGCCTCTA	-	chr1	194422286	194422806	15	common
chr11	94803879	94803902	CCTTTGTTGCCAGGAGCACC	-	chr11	94803735	94804022	13	common
chr11	94980037	94980060	GTCCTGGCTAGGCAAAGGCA	+	chr11	94979888	94980148	15	common
chr1	195209296	195209318	GGGGAGAGGACCTGTTCCT	-	chr1	195208908	195209599	15	common
chr11	95250503	95250526	GTTCTTGCTTGGTGCTGGTA	+	chr11	95250474	95250622	11	common
chr11	95382212	95382235	TGCGAGGATACGAGTGGCGT	+	chr11	95381981	95382404	15	common
chr1	195415526	195415547	GAGGGAGTGGTGTGGGGT	+	chr1	195415299	195415624	15	common
chr11	95439286	95439309	TGGGCTGACGCCGAATGCGA	-	chr11	95439004	95439504	15	common
chr11	95439457	95439480	AGCGTGTGCGGGGTGGGCTC	-	chr11	95439004	95439504	15	common
chr1	195529383	195529404	GAATGAACGCACAGAGAC	+	chr1	195529141	195529632	14	common
chr11	95547488	95547511	GTCACGCCTGGCTCAGGGTT	-	chr11	95547332	95547662	15	common
chr11	95954853	95954876	GGAAAGGCAAGCACGGTATG	-	chr11	95954709	95955025	13	common
chr11	96096466	96096489	GGATGCTGTGGATGTGGTCA	-	chr11	96096259	96096620	15	common
chr11	96164631	96164654	CAATGCGAGCCTCCGAGAGG	-	chr11	96164446	96164751	11	common
chr11	96414721	96414743	GTGCAGGGGGTGGGGGTTT	+	chr11	96414526	96414820	10	common
chr11	96723288	96723311	GTGTCATCTTCTTGGATCCC	+	chr11	96723279	96723578	15	common
chr11	96817832	96817855	TGAGCTCTCGCCGCCGCCGG	+	chr11	96817628	96818037	11	common
chr11	96843845	96843867	GTGCTCTCTGGGCAGGTGT	+	chr11	96843420	96844182	15	common
chr11	96887550	96887573	AGGCCGAGGAAGGAGGCAGC	-	chr11	96887560	96887724	15	common
chr11	96887702	96887724	GTTCTGGAGGAGGGGTGCG	-	chr11	96887560	96887724	15	common
chr11	96944258	96944281	AGGCCCCTGACGCTTGACCA	-	chr11	96943983	96944666	12	common
chr11	97008130	97008153	GCCCATTCTTGTTTCTCCTC	-	chr11	97008048	97008493	15	common
chr11	97372671	97372694	CTAACTGGCTCTTCTGCCTT	+	chr11	97372526	97373003	15	common
chr11	97418409	97418432	GACTAAGAAAAGGAAGCATG	+	chr11	97418173	97418746	15	common
chr11	97437103	97437126	GGGGAAGGGCAGAGGTGAGG	-	chr11	97437086	97437313	15	common
chr11	97551489	97551512	CGCAGGGCTGGGCAAGGAGG	+	chr11	97551234	97551654	15	common
chr11	97551492	97551515	AGGGCTGGGCAAGGAGGAGG	+	chr11	97551234	97551654	15	common
chr11	97663111	97663132	CACCCACTCCCTCTTCCC	-	chr11	97663031	97663261	13	common
chr11	97864117	97864140	CCTGGAGGCAAGACACATCT	+	chr11	97863958	97864337	15	common
chr11	98203864	98203887	GTGAGGCTGGTGGAGGGAGT	+	chr11	98203790	98204183	15	common
chr11	98204005	98204028	CAAGCGGCAACCCATGGAGG	-	chr11	98203790	98204183	15	common
chr11	98300300	98300321	CCCCACGTGACTTTGGCG	-	chr11	98300200	98300499	15	common
chr11	98429795	98429817	GTTGTGGTCTGCCTGATGT	-	chr11	98429501	98430044	10	common
chr11	98571815	98571837	GCCAGAGCTAGCCAGGGAC	+	chr11	98571785	98572056	15	common
chr11	98571815	98571838	GCCAGAGCTAGCCAGGGACT	+	chr11	98571785	98572056	15	common
chr11	98571934	98571957	CACGAGAGGACCTGTTGACA	+	chr11	98571785	98572056	15	common
chr11	98579184	98579207	GCAGCAGCAGGCAGGGTGTG	+	chr11	98579084	98579537	15	common
chr11	98972196	98972219	GTCTATAACTGTGGTTCCAG	+	chr11	98972057	98972358	14	common
chr11	99068354	99068377	GCTCTCTCAAGTCCATGAAT	+	chr11	99068318	99068809	14	common
chr12	101842971	101842993	CACACTGCCTTGGAGATCA	-	chr12	101842820	101843072	13	common
chr12	102010976	102010999	TGGGTAAAGGGCTGTCCACA	-	chr12	102010948	102011115	11	common
chr12	103943543	103943566	GGGGCCTGGGGCAGAGCTCC	+	chr12	103943441	103943710	15	common
chr12	104732907	104732930	CCTCTGTGGTGAGCGGGGTT	-	chr12	104732667	104732998	14	common
chr12	10544128	10544151	AGTGGCTCTCCGTTGACCAC	+	chr12	10543965	10544303	13	common
chr12	105656901	105656924	GGCCATTTGGGAGAAGGCAG	+	chr12	105656870	105657043	15	common
chr12	105657720	105657741	GTCAGGGCCAGGCAGAGG	-	chr12	105657228	105657788	14	common
chr12	105686567	105686590	CGGCAGCCTCTGCCAGCAGG	-	chr12	105686240	105686715	14	common
chr12	106068161	106068184	GTTCCTTCTACAAGTGTCTG	+	chr12	106068069	106068261	10	common
chr12	106266077	106266100	GTACTGGGCCTGTGACGACG	+	chr12	106266011	106266277	15	common
chr12	106714607	106714629	CAGGGTTATGGGCAGTGGT	+	chr12	106714624	106715159	14	common
chr12	107221755	107221778	GAGGGAGGATCAAGGGAGGA	-	chr12	107221428	107222166	10	common
chr12	107294252	107294275	ATGAGCATGAGTACGTGCAC	+	chr12	107293889	107294390	15	common
chr12	109576936	109576959	CAAGCGGGAAGACCTGGCCC	-	chr12	109576572	109577128	13	common
chr12	109602216	109602239	TGGTGGCACAGTGAATGAGC	-	chr12	109601989	109602374	14	common
chr12	109774719	109774742	ATAGTTGTGAGCTGCCACGG	+	chr12	109774631	109774977	14	common
chr12	112082114	112082137	GGGTGAGCCTGGGCACTAAG	+	chr12	112081929	112082262	15	common
chr12	112697962	112697985	CAGGAAGTAGGCCAGAAGAT	-	chr12	112697614	112698072	14	common
chr12	112906725	112906748	CTGTGATGAGCCTGACCAGC	+	chr12	112906507	112906889	15	common
chr12	112934840	112934864	CTGGATGTGGCCAGGACTGTC	+	chr12	112934547	112934885	15	common
chr12	113844285	113844308	GACAAGCTGTGGCCAAGTCA	+	chr12	113843624	113844358	14	common
chr12	114038909	114038930	AGGAGGTGGCAGGATGCC	+	chr12	114038730	114039058	14	common
chr12	114111987	114112009	GGGAAAGTGGGCTGGAGCC	-	chr12	114111722	114112157	14	common
chr12	114223735	114223757	CTCAGTCCCCCTAGGGGTC	+	chr12	114223671	114223877	11	common
chr12	114313568	114313590	GGCCACGGCAAGCCCCTGT	-	chr12	114313121	114313681	14	common
chr12	114454226	114454249	GAATCACTCAGGGGACAGCA	+	chr12	114454132	114454424	14	common
chr12	114454271	114454294	AGATGAACTTGGGTCTGGCT	+	chr12	114454132	114454424	14	common
chr12	117441279	117441302	ATCATGCAGTACGGCATGCC	-	chr12	117441167	117441457	15	common
chr12	12427724	12427747	CCTAAAGGGGGGTCTGGGGA	+	chr12	12427547	12427919	15	common
chr12	12427730	12427753	GGGGGGTCTGGGGAAGGCTG	+	chr12	12427547	12427919	15	common
chr12	13221984	13222006	GCAGTGTTTTCTTGGTGCT	+	chr12	13221708	13222153	13	common
chr12	25777363	25777386	CTTCTAATCAGCCTCAGCCT	-	chr12	25777134	25777451	15	common
chr12	31801277	31801299	CCCATTGCCCTCGTAGCAG	-	chr12	31801045	31801278	13	common
chr12	3235789	3235812	GCCGCGAGGAGGCGCTCGCC	-	chr12	3235695	3235994	16	common
chr12	33832530	33832553	GGCGGAGGAGGCGGGAGGCG	-	chr12	33832245	33832751	14	common
chr12	33832532	33832554	CGGCGGAGGAGGCGGGAGG	-	chr12	33832245	33832751	14	common
chr12	33832539	33832562	GAGGAGGGCGGCGGAGGAGG	-	chr12	33832245	33832751	14	common
chr12	33832542	33832565	GGGGAGGAGGGCGGCGGAGG	-	chr12	33832245	33832751	14	common
chr12	33965840	33965862	ACCTGACAAGGCCAGAAGG	+	chr12	33965731	33965963	14	common
chr12	3550601	3550624	CAGCCCTACAGTCTGAGAGG	+	chr12	3550340	3550662	10	common
chr12	3781710	3781733	CCCTGATCTGTGTGCCAAGC	+	chr12	3781433	3781866	16	common
chr1	23799702	23799725	GATGGACCAGCCTCAACAGT	-	chr1	23799647	23799984	15	common
chr12	4578920	4578943	GTGGGTGGGGACAGATAGGG	+	chr12	4578677	4579041	13	common
chr1	24685467	24685490	GGGGCGGAGGGGCAGAGCGG	-	chr1	24685264	24685558	14	common
chr12	55199950	55199973	AAGGCGTGTCCGCTCCATCC	-	chr12	55199765	55200124	15	common
chr12	57775900	57775923	TGCATGTGCAGTGGCAGTGG	+	chr12	57775812	57776066	10	common
chr12	70330371	70330394	GTTTACACACCAGAGCCTAC	-	chr12	70330227	70330808	10	common
chr12	70995106	70995129	CACAGGCCAGAAGAGGGCGT	-	chr12	70994989	70995217	12	common
chr12	73368697	73368720	GGCTCGGTGGGTAAGTGCAC	+	chr12	73368543	73369172	11	common
chr12	74618480	74618503	GGGCAACAGCGACCTCTGCT	+	chr12	74618209	74618636	13	common
chr12	75110642	75110665	CTTCTATGGTTGCAGGATCT	-	chr12	75110398	75110864	15	common
chr12	76897710	76897732	GTAGCTGCCATGTGGATGT	+	chr12	76897588	76897792	12	common
chr12	76897710	76897733	GTAGCTGCCATGTGGATGTT	+	chr12	76897588	76897792	12	common
chr12	76995367	76995390	CTCGTGAGTGCGGTGATAAA	+	chr12	76995108	76995631	11	common
chr12	77231581	77231604	GTGGACATTAGCTTGTCTCC	-	chr12	77231377	77231622	14	common
chr12	80123894	80123917	GATCCACTAACATCTGTGTT	+	chr12	80123703	80124246	14	common
chr12	80273053	80273076	CTGCCTCTTGTGGTGACTGG	-	chr12	80272965	80273155	13	common
chr12	80273054	80273077	GCTGCCTCTTGTGGTGACTG	-	chr12	80272965	80273155	13	common
chr12	81509011	81509034	GTCTCTGTGGGTACTGCAGC	+	chr12	81508941	81509207	11	common
chr12	85930874	85930897	GCTCCCTCTGCGCCATCTGC	+	chr12	85930701	85931122	15	common
chr12	87004017	87004040	CTGCCCTCCAGTGGCTATCT	+	chr12	87003852	87004287	14	common
chr12	87743827	87743850	GTCGGCAGAGGTGCTGCGAG	-	chr12	87743747	87744058	15	common
chr12	88322373	88322396	CAACAATTCACGCTCTTCTT	+	chr12	88322166	88322504	14	common
chr12	88754247	88754270	GTCTTTTCTGCAGAGGAGCA	+	chr12	88753961	88754481	15	common
chr12	88757797	88757820	GTTTACCAGCAACCACATGG	+	chr12	88757649	88757913	14	common
chr12	9058974	9058998	CCACCTTTAGCCATGTGTCCA	-	chr12	9058819	9059278	15	common
chr13	100772030	100772053	CCTCAAAGCTTCTGAAAGGC	-	chr13	100771921	100772174	15	common
chr13	101662306	101662329	GCAGCCGCGAGAGCCGAGGA	+	chr13	101662077	101662490	15	common
chr13	106013574	106013597	TATTTTGCTACCTGAACAAT	-	chr13	106013303	106013576	10	common
chr13	109131955	109131976	GGCCCTCTTCTGGCCTGC	-	chr13	109131825	109132207	12	common
chr13	109131955	109131978	GGGGCCCTCTTCTGGCCTGC	-	chr13	109131825	109132207	12	common
chr13	21292452	21292475	GTGGCCAACCGCGGCGGTGT	-	chr13	21292331	21292682	15	common
chr13	21292578	21292601	ATTCTGTTTGGCCTGGAAGG	-	chr13	21292331	21292682	15	common
chr13	22020601	22020624	GCCGTCTTGTGGCCTTTGTG	-	chr13	22020468	22020857	12	common
chr13	23522885	23522907	GTTGTCACGGAACAGTCCC	-	chr13	23522758	23522976	13	common
chr13	25012547	25012569	AAAGGGAGGCACAGACAGG	+	chr13	25012256	25012653	12	common
chr13	25208002	25208024	GGTGGAACAACGGAGGCGA	-	chr13	25207800	25208422	14	common
chr13	31073746	31073769	CAGGGATGCACCTTCTCCAT	+	chr13	31073657	31073898	12	common
chr13	31710465	31710487	GCTGGAGCCGGGTGGGGGT	-	chr13	31710454	31710737	15	common
chr13	32995271	32995294	GGTCTGCGTGCGCCACCTAG	-	chr13	32995137	32995384	15	common
chr13	3406087	3406110	AGGGGTCGCAATAACACCAC	+	chr13	3405996	3406177	11	common
chr13	37417552	37417575	CCTGGTGGCCCATCATTGTT	+	chr13	37417379	37417715	13	common
chr1	33796367	33796390	AGGGCGCCATCTACATTCTG	-	chr1	33796289	33796800	15	common
chr13	38434467	38434490	AGCAACCAGATGTTTGCTAT	+	chr13	38434413	38434871	11	common
chr13	39103882	39103905	CTAGGCACTGCCAGTAGAGG	-	chr13	39103766	39104081	15	common
chr13	39532934	39532957	GGGAGAGCTGTGTGTACTGC	-	chr13	39532765	39533076	15	common
chr13	42396104	42396127	GGGGGAGATGGAGAGCTGCA	-	chr13	42395956	42396290	15	common
chr1	34275425	34275446	GCTGGGTACAGGGCAGGA	+	chr1	34275107	34275531	15	common
chr13	44385794	44385817	CTGGTTGTGAGTGGCCATGT	+	chr13	44385490	44386025	12	common
chr1	34568014	34568036	CCTGACCTGGTCAAACAGT	+	chr1	34567929	34568190	15	common
chr1	34568128	34568150	TGGCAGCCTCAGGCAGTGG	+	chr1	34567929	34568190	15	common
chr13	45791494	45791516	CCTCATTGTAGCTGATGGA	-	chr13	45791464	45791765	10	common
chr13	47110179	47110202	CGTGACCGTGGCCGTGACTG	-	chr13	47110034	47110313	13	common
chr13	48746094	48746118	ATAATGCATCATTGAACATGC	-	chr13	48746056	48746299	11	common
chr13	48902936	48902957	GGCAGGGCTGCTGCCTGT	-	chr13	48902786	48903090	15	common
chr13	49476806	49476829	CAGTGTTGGAATGACAGTGT	+	chr13	49476591	49476923	15	common
chr13	51940235	51940258	CAACGCCAAAGGCTAGGCGA	-	chr13	51940140	51940328	15	common
chr13	52928651	52928674	GGGCCAGTCTGATCTACACA	+	chr13	52928445	52928889	14	common
chr13	53205192	53205215	GGGCGGAGGGTTCAGAGACT	-	chr13	53204856	53205293	15	common
chr13	54418578	54418601	ATGCCCCCAGCGGCAGGAAT	+	chr13	54418395	54418907	15	common
chr13	54667203	54667226	AGTCTGGCAAAGTGGGGGAT	-	chr13	54666952	54667256	14	common
chr13	55638110	55638132	GGACAGCGTGCGGAGGGTA	-	chr13	55638101	55638516	15	common
chr13	55742034	55742057	GCGCCACCTGCTGGGGGTGC	+	chr13	55741876	55742158	15	common
chr13	56535089	56535112	GGTAGGTGTGGTGCCTTCTT	-	chr13	56534863	56535143	15	common
chr13	56859904	56859927	AGAGAGAAGGCTTCTGGGGA	-	chr13	56859860	56860156	15	common
chr1	35903607	35903630	GTGTTCAAGATGCTTGGCTG	-	chr1	35903440	35903698	14	common
chr1	36206363	36206386	TACAACTGGGGCTGAGGAGA	+	chr1	36206192	36206574	13	common
chr13	62957754	62957777	CTCGTGGTTTACAGATGTGT	-	chr13	62957633	62958370	15	common
chr13	63458323	63458345	CCCTGCAAGATGGCTCAGT	-	chr13	63457834	63458351	10	common
chr13	64350322	64350343	CCTGGTGGCAGGCAGCGG	-	chr13	64350158	64350433	15	common
chr13	69692084	69692106	GGGCGGAAGATACCTGCCA	+	chr13	69691958	69692280	14	common
chr13	69692084	69692107	GGGCGGAAGATACCTGCCAT	+	chr13	69691958	69692280	14	common
chr13	70130380	70130403	GTCAGGTGCTCTGAACTGTA	+	chr13	70129841	70130494	14	common
chr1	37329502	37329525	CTCTACTGCCATCTGCTGGT	-	chr1	37329352	37329636	13	common
chr1	37710995	37711018	ATCGTGGTGAGCCGACATGT	-	chr1	37710865	37711613	10	common
chr1	37924048	37924070	GAGTCACCTTATGGATGCT	-	chr1	37923917	37924298	12	common
chr13	83854711	83854734	CTCCCTTCTCTCTTCCCTGC	+	chr13	83854601	83854925	15	common
chr13	8744131	8744153	GGCACATGGAGTGAGGTGT	+	chr13	8743962	8744270	11	common
chr13	93625977	93626000	ACTGCTCTTGCTGAGGACGT	+	chr13	93625866	93626191	11	common
chr13	94013321	94013343	TGCTAGAGGCCACCACAAG	-	chr13	94013156	94013425	12	common
chr1	39554833	39554856	CCTGCTGGCAAGGGGGAGAG	+	chr1	39554691	39555105	12	common
chr1	39561301	39561324	GCCTGCTGTAGGCCAGAAGA	-	chr1	39561128	39561374	12	common
chr13	95788068	95788091	CAGGCAGTTAATCTCATGCT	+	chr13	95787986	95788184	15	common
chr1	39579471	39579493	GGGTGCTGGGAGAGGGTGT	+	chr1	39579451	39579737	13	common
chr13	97869615	97869638	TAAGCTCTGTCTCCCTCTGC	+	chr13	97869432	97869830	13	common
chr1	40901662	40901685	GGGGGACTGGTGCCATCTGG	+	chr1	40901338	40901976	13	common
chr14	104118201	104118224	TGCCCTCCTGTGGACTGTCC	-	chr14	104118101	104118268	12	common
chr14	104426703	104426726	ATCCATTGTTGCCCCGACTT	-	chr14	104426394	104426767	10	common
chr14	119219457	119219480	GACACCTCGGCATCGATTGT	-	chr14	119219346	119219669	13	common
chr14	119425302	119425325	CTCCCCGTGGCGCCCTCTGT	-	chr14	119425132	119425681	10	common
chr14	20659225	20659247	GCCACCTGTTGGCAGAATA	-	chr14	20658953	20659374	14	common
chr14	21077901	21077924	TGGCATCCCCTGCATGACCC	-	chr14	21077773	21078300	15	common
chr14	21480292	21480314	GTGGAGTCTTAGGCGTTGT	+	chr14	21480283	21480541	15	common
chr14	21692724	21692747	GTCACGCTGGCGCCCTCTCC	+	chr14	21692628	21693019	15	common
chr14	22800699	22800722	CTCCACCTTTCCTGCTTTCA	-	chr14	22800624	22800981	13	common
chr14	23397675	23397698	GTAGGCTGGGGAAACAGTTC	+	chr14	23397465	23397805	15	common
chr14	25329593	25329616	GTGCATGTAGGTACCTGCAG	+	chr14	25329442	25329953	11	common
chr14	25329746	25329769	CTAGCCCTGTGCATGGTCAG	+	chr14	25329442	25329953	11	common
chr14	26385462	26385485	TGGGTGGCCTTGCAAACCAC	+	chr14	26385320	26385627	15	common
chr14	26513466	26513489	GCTCAGTGTGTAGGGATGGA	+	chr14	26513338	26513768	15	common
chr14	26635943	26635966	GGGGAAGGAGGGAGGGAGAT	+	chr14	26635909	26636199	15	common
chr14	30950040	30950063	TGCCACACGTTTGAGGGAAA	+	chr14	30949972	30950400	15	common
chr14	33422850	33422873	GGCGCTGTCAGCTGCACTGT	+	chr14	33422656	33423152	15	common
chr14	41708102	41708124	GTCCAGTTCGGTCGGCAGG	-	chr14	41707955	41708239	15	common
chr14	46186390	46186413	GTTCCCTCAGGGGCCAGAAG	+	chr14	46186294	46186576	14	common
chr14	47323014	47323038	CTGGCCGCGTCCACCAGGTGG	-	chr14	47322463	47323098	15	common
chr14	47341938	47341961	CCCCACAGCTGCTGTGCACT	-	chr14	47341777	47342131	10	common
chr14	48674610	48674633	CTTGAGTGCAGTGCCTGTGG	-	chr14	48674446	48674704	10	common
chr14	49143968	49143991	CCTACTGGAAAAAGCGTGCA	-	chr14	49143661	49144170	11	common
chr14	52628691	52628713	CACAGTCTGACGGCCCACG	-	chr14	52628458	52628879	15	common
chr1	45488869	45488892	GCTGCCTGAGAGTATTCTGG	-	chr1	45488769	45489038	10	common
chr14	55031876	55031899	GCAGTGGTTGAGGAAAGAGG	-	chr14	55031584	55031921	14	common
chr14	55068357	55068380	CCTGTGGGCTCCGAAGACGC	+	chr14	55067925	55068467	15	common
chr14	55216137	55216161	GCATCTTCAATGCTGAGGGGT	+	chr14	55215959	55216237	13	common
chr14	55260624	55260646	AGGGAGCTCGCCAGGGACA	+	chr14	55260489	55260939	15	common
chr14	55260624	55260647	AGGGAGCTCGCCAGGGACAG	+	chr14	55260489	55260939	15	common
chr14	55270256	55270279	GAGGGGGGAGAGGGAGGCGA	-	chr14	55269717	55270296	14	common
chr14	55643259	55643282	CCAGGTGGCATTAGTGGCTC	+	chr14	55642902	55643412	12	common
chr14	55720631	55720654	TGGGTTGGCAGGGTAGAGGA	+	chr14	55720560	55720861	13	common
chr14	55732862	55732885	GTAGGGGTGGAGGCGGCGTC	+	chr14	55732846	55733331	12	common
chr14	55767439	55767462	GCTGGTCTGAGCTTGCCTGA	-	chr14	55767398	55767700	14	common
chr14	56057501	56057524	GTAGAGGCAGGGTCAGGCAT	-	chr14	56057130	56057624	15	common
chr14	56441546	56441569	CCACATTGGCCTTGAGGTCG	-	chr14	56441262	56441647	15	common
chr14	57217592	57217615	GACGACCTGAGTTTGATCCG	-	chr14	57217552	57217957	15	common
chr14	57506112	57506136	CTGGGTCTCTAATGGCGGACG	+	chr14	57506091	57506524	15	common
chr14	57506964	57506987	GGGGAGGAGGGGTGTTGGGA	+	chr14	57506816	57507243	15	common
chr14	57678981	57679004	AGTGAGCCTGGCTCTGTGGC	+	chr14	57678949	57679347	13	common
chr14	61950150	61950173	GCCAACGTGCCGAGTGGGTG	+	chr14	61949935	61950387	13	common
chr14	64688919	64688942	GTGAAGGCTCCTGGATCCTC	-	chr14	64688548	64689087	15	common
chr14	65645271	65645294	GTGGGAAAGGTGGTTCTGGG	-	chr14	65645025	65645464	13	common
chr14	65788962	65788985	GCTGGTCGGATGCGGGAGAA	-	chr14	65788849	65789381	14	common
chr14	69856235	69856258	GTGGGTATTCTCTTGAGAGG	+	chr14	69856236	69856683	15	common
chr14	70598385	70598408	AGAGGAATGTGGCCAGCAGA	-	chr14	70598226	70598626	14	common
chr14	73383579	73383603	TGGCATGACTCCCAGCGTCAG	-	chr14	73383371	73383756	15	common
chr14	73909631	73909655	GGGAACTGCATCTCTCATCCT	+	chr14	73909562	73909932	15	common
chr14	77408330	77408352	GCATGATGTCATGGGGCGT	-	chr14	77408157	77408342	12	common
chr14	79688285	79688308	GTCATATCCCCTGGCACTGG	+	chr14	79688208	79688482	13	common
chr14	8829879	8829901	GGTTTCTTGGCTGATGAGC	+	chr14	8829704	8830282	15	common
chr15	100299273	100299295	CAGGGACCGACGAGGGCAC	+	chr15	100298733	100299292	15	common
chr15	101157887	101157910	GCTGTTTCCCAGTGGGGGCA	+	chr15	101157590	101158057	15	common
chr15	102358505	102358527	GTATATGTGTGCTGGGGGA	+	chr15	102358468	102358660	13	common
chr15	102496111	102496134	CTCCCCCTACTGGTCCGGGG	+	chr15	102495772	102496300	13	common
chr15	102523589	102523610	GCGGGGGTGCGCCAGGGT	+	chr15	102523407	102523794	13	common
chr15	102570674	102570697	GAGAAGCCCTCTGAGTGACA	-	chr15	102570326	102570769	15	common
chr15	102583762	102583785	GGCTTGGGAGATGAAGAAGG	-	chr15	102583632	102584208	15	common
chr15	102796898	102796921	GTGGGGTAGGTGGAGGGACA	-	chr15	102796754	102797160	12	common
chr15	102796904	102796927	GTAGTGGTGGGGTAGGTGGA	-	chr15	102796754	102797160	12	common
chr15	103173036	103173059	GCCCTCTGGTGGTAAAACTC	+	chr15	103172957	103173423	11	common
chr15	11336783	11336806	GGTCAAGTGACGCCCTCTGC	+	chr15	11336545	11336957	12	common
chr1	52001844	52001866	GGCATGGATCGGAACCCTT	-	chr1	52001725	52002029	12	common
chr15	27835333	27835356	GAAGGGACAGGCAGGCAGGC	+	chr15	27835205	27835549	15	common
chr15	34236868	34236890	GGGCGCTGTGCTTCGCTGC	+	chr15	34236759	34237042	14	common
chr15	36447704	36447727	GAATCTCAACATCCACATGG	+	chr15	36447568	36447907	15	common
chr15	36466716	36466739	GTTCATATCATGGCAGATAG	-	chr15	36466606	36467138	12	common
chr15	3976197	3976220	CCAGACTTGAAGAGAGTTGT	+	chr15	3976019	3976650	14	common
chr15	3976589	3976613	GCAAGGGGCGGCACCGCTCTG	+	chr15	3976019	3976650	14	common
chr15	41650423	41650446	GGCATCTCCAAAGCACGCTC	+	chr15	41650367	41650579	11	common
chr1	54438588	54438611	CATCAGATCTCCTGGACCTG	+	chr1	54438202	54438770	11	common
chr15	48624484	48624507	GGTCCCTTTAGATGTGAAGG	-	chr15	48624306	48624661	11	common
chr1	55440094	55440117	CCCCCTGTTGAGGTTGGGCC	+	chr1	55440002	55440385	15	common
chr15	55117034	55117057	GACGCCCTCTGCTGGCACAC	-	chr15	55116869	55117147	10	common
chr15	60591637	60591660	TGAGCTGTCCCCCACGCCCC	+	chr15	60591550	60591938	15	common
chr15	60989154	60989177	GCAGACAGTGAGGACTAGAG	+	chr15	60989065	60989454	15	common
chr15	66274180	66274203	GATGCTGGGAGGTGAGGAGT	-	chr15	66273996	66274266	12	common
chr15	7082923	7082946	GGGAAGTGTAGCTCAGGTAG	+	chr15	7082828	7083066	10	common
chr15	7082959	7082982	CAACATCCAGGCGGCGCCAT	+	chr15	7082828	7083066	10	common
chr15	7083006	7083028	TGGGGAGAGGGGCAGGCTG	+	chr15	7082828	7083066	10	common
chr15	73518115	73518138	CCTGCAGTTGGCTGAGCACA	+	chr15	73517970	73518420	16	common
chr15	73585848	73585870	GGGAAGGTGAGTGACAGGT	+	chr15	73585679	73585991	14	common
chr15	73588145	73588168	GTGAACAGACACCGGGACCA	+	chr15	73587575	73588169	15	common
chr15	73622407	73622430	GGGGTGGGAAGAGGAAGAAA	+	chr15	73622219	73622557	15	common
chr15	74754109	74754130	GGGGAAGCAGGGAGGAGG	+	chr15	74753974	74754335	15	common
chr15	74754109	74754131	GGGGAAGCAGGGAGGAGGA	+	chr15	74753974	74754335	15	common
chr15	74754123	74754146	GAGGAGGGCTCAGAGGGCTC	+	chr15	74753974	74754335	15	common
chr15	74798741	74798764	CTCTCAGCGTGTGCTTGCTA	+	chr15	74798542	74799042	15	common
chr15	74949388	74949409	GTCAGGAGGAGGGAGGAC	+	chr15	74949291	74949546	12	common
chr15	75714772	75714795	AGGACAGCTGCAGGGCGACC	-	chr15	75714602	75714826	15	common
chr15	76432855	76432878	GTGGTGTCTACCTCCAGGTG	-	chr15	76432772	76432936	11	common
chr15	76432856	76432878	GTGGTGTCTACCTCCAGGT	-	chr15	76432772	76432936	11	common
chr15	76432857	76432878	GTGGTGTCTACCTCCAGG	-	chr15	76432772	76432936	11	common
chr15	76470149	76470171	AATGGACAGCTGCGCGAGG	-	chr15	76470047	76470460	14	common
chr15	76470161	76470185	GCTGTCCATTCCTCTGGGCCC	+	chr15	76470047	76470460	14	common
chr15	76470236	76470259	CGGGACGCAGGGTGTGGATC	-	chr15	76470047	76470460	14	common
chr15	76470298	76470321	GGCTTGTCTGGCTATGACCC	-	chr15	76470047	76470460	14	common
chr15	76470346	76470369	GCGTGGGCTCAGGGAAGCGC	-	chr15	76470047	76470460	14	common
chr15	76648595	76648618	GGGGCGGAGTCGGAGGCGGG	-	chr15	76648460	76648771	14	common
chr15	76648596	76648618	GGGGCGGAGTCGGAGGCGG	-	chr15	76648460	76648771	14	common
chr15	76758364	76758387	GGGCGGCAGATCCCTGGAAT	-	chr15	76758254	76758540	13	common
chr15	77167113	77167136	CTCAAAACAGAGGTGGAGGC	-	chr15	77166919	77167494	14	common
chr15	77198775	77198798	CGCACGTCGTGTCCACACGG	-	chr15	77198555	77198898	15	common
chr15	77612923	77612946	GTCTCCTGCTGCTGACCTAC	+	chr15	77612900	77613125	15	common
chr15	78009014	78009037	AGCAGGGGGCAGCAGTCGCC	+	chr15	78008834	78009136	15	common
chr15	78088075	78088097	CTATGTGATTGCTGTGACC	-	chr15	78087825	78088222	13	common
chr15	78151485	78151508	CAGGACAAGAGGGGAAGTTC	+	chr15	78151259	78151586	15	common
chr15	78199147	78199170	TGTGATTTCAAGGCCAGCCC	-	chr15	78199047	78199834	15	common
chr15	78253234	78253257	GGGCGCCAATGGGACGGCCT	-	chr15	78253029	78253376	15	common
chr15	78700448	78700471	CCCGGTTTTTGTTTCCTGCT	-	chr15	78700282	78700602	15	common
chr15	78773181	78773204	GTGGGTGCTGCAGACAGCTG	+	chr15	78773201	78773703	15	common
chr15	78793383	78793406	CAGTAATCCCAGCATGGAGG	-	chr15	78793298	78793677	14	common
chr15	79073666	79073689	ACAGGTGCTCCCTTCTAGCT	+	chr15	79073593	79073954	15	common
chr15	79073755	79073778	GCACAGTGCAGGACAAGTAG	-	chr15	79073593	79073954	15	common
chr15	79110887	79110910	GGGAGGCGGAGTTCTAGACC	+	chr15	79110571	79110944	15	common
chr15	7924617	7924641	TGGGTACTGAGAATTGAACAT	+	chr15	7924259	7924665	13	common
chr15	79658852	79658875	GGGCAGCAGCTGGGGTGGCC	+	chr15	79658771	79659331	11	common
chr15	79660920	79660942	CTTGTCCCTTGAGGGTTTG	-	chr15	79660842	79661158	15	common
chr15	80055877	80055899	GGGGGAGAGAGCTGGCAGG	-	chr15	80055533	80056042	15	common
chr15	80111291	80111313	CACCCTCTGCTGGCCTCGG	+	chr15	80111144	80111474	15	common
chr15	80171037	80171059	ATTGGGAAATCAAGGAGTC	+	chr15	80170734	80171275	15	common
chr15	81279116	81279139	CTTGTGTCTGAGTACTGCAC	-	chr15	81278985	81279238	11	common
chr15	81337972	81337995	AGGGGAGAGGAGAGAGGGTC	-	chr15	81337673	81337989	10	common
chr1	58169885	58169907	GGCCAGGTTTTAAGGAAAG	+	chr1	58169671	58170056	15	common
chr15	81748135	81748158	TGACTGCCGCCTGCCTGAGG	+	chr15	81748101	81748407	15	common
chr15	81787111	81787134	GTGGAAATGGCGCCCTCTTC	-	chr15	81786900	81787271	15	common
chr15	82067258	82067281	TGCCTGCTAACCTGGATGAC	-	chr15	82067031	82067648	15	common
chr15	82090441	82090464	AAGGCACTGAGGGCTAGTGG	-	chr15	82089936	82090502	15	common
chr15	82876771	82876794	GGAATGAGAGGAGGAAGGGG	+	chr15	82876737	82877293	10	common
chr15	83330938	83330961	GTTGTGAGCTGCTGCAGTGT	-	chr15	83330718	83331156	14	common
chr15	83330993	83331016	CTCCCTCTTCTGGTCTACCT	+	chr15	83330718	83331156	14	common
chr15	83438081	83438104	AGCTGAACAGGGGTGCGCCA	+	chr15	83437693	83438432	15	common
chr15	83587400	83587423	GCCAGCAATTCTGCACAGCG	-	chr15	83587170	83587509	15	common
chr15	83896329	83896353	GCTAGAGTTACAGGTGGTTGT	+	chr15	83896193	83896476	10	common
chr15	83951244	83951267	AGGGCGCCCTCTGCAGGGAG	-	chr15	83951099	83951447	10	common
chr15	84179328	84179351	GGCTATGTGTGTCTGTGTGT	+	chr15	84178842	84179485	11	common
chr15	84826434	84826457	GGCATCATTGGGACCTTAGG	+	chr15	84826442	84826755	15	common
chr15	84826531	84826554	CAGGGTCCTAGTCAAGGGAG	+	chr15	84826442	84826755	15	common
chr15	85308161	85308183	ATTAGTGTGGCGGGGGAGT	-	chr15	85308040	85308428	15	common
chr15	85308222	85308245	GGGGGCACATGGGGATGTGT	+	chr15	85308040	85308428	15	common
chr15	85413735	85413758	CTCACTTTGCCTTGGAGTCT	+	chr15	85413577	85414478	15	common
chr15	85546626	85546649	CAGGGCGCCACCTGGTGGAC	-	chr15	85546504	85546988	15	common
chr15	85671539	85671562	CTGGGGGTGGGGCTGGGCGT	+	chr15	85671499	85671789	14	common
chr15	85863245	85863268	CACCCGTGGCGGCATCGATG	+	chr15	85863114	85863454	13	common
chr15	85965770	85965793	CTCCACCAGCCCCTGGTGTT	+	chr15	85965760	85966104	15	common
chr15	86070429	86070451	GCCCCTCATGGTCAGGAGG	+	chr15	86070129	86070608	15	common
chr15	86236444	86236468	CTCGCTGTCCTTCTCACGTGT	+	chr15	86235925	86236526	16	common
chr1	58636216	58636239	GTGCCTATGGTGGCCAGCAG	-	chr1	58636096	58636315	11	common
chr15	88958945	88958968	GTGCATAGTTAGGTGAGACC	-	chr15	88958772	88959090	15	common
chr15	89560730	89560753	GTGTGGGTGAGTTGGCCCTG	-	chr15	89560522	89561004	13	common
chr15	89560978	89561000	GTGGGTGGCACAGTAGAGT	-	chr15	89560522	89561004	13	common
chr15	9049950	9049973	TCTGGCTGCTGACCACTAGA	+	chr15	9049622	9050165	13	common
chr15	9049962	9049985	GGTGTGCTGCTGCCATCTAG	-	chr15	9049622	9050165	13	common
chr1	59199847	59199871	GTACCCCAGGAGGCCAGAAGG	-	chr1	59199725	59199926	12	common
chr1	59304731	59304753	CAGGCACTGTGGAATGAGA	+	chr1	59304503	59304843	14	common
chr15	96306898	96306921	AGGGAAGCCATCCTCCATGC	-	chr15	96306768	96307469	15	common
chr15	96497301	96497323	TGGACAGGGACGTTTCACA	+	chr15	96497102	96497446	13	common
chr1	59670691	59670714	CAGGCACATGCCCAAGTCAG	+	chr1	59670582	59671038	14	common
chr15	96767326	96767349	GCCACTCTTCGTCCAGCAGG	+	chr15	96767179	96767507	15	common
chr1	59680457	59680479	CTGGGAGTAGGGAAGGAGA	-	chr1	59680234	59680511	13	common
chr1	59680457	59680480	CCTGGGAGTAGGGAAGGAGA	-	chr1	59680234	59680511	13	common
chr15	97494563	97494586	GACATTTGGTCTCCATCTGG	-	chr15	97494183	97494859	14	common
chr15	98462049	98462071	GGCCGATGCAGCCACCTGG	+	chr15	98461932	98462441	15	common
chr15	98530215	98530238	CAGGGGCGAGGCGGCTGTGG	+	chr15	98529810	98530274	15	common
chr15	98634730	98634752	ATTTTTCAGCAGACGGTGC	-	chr15	98634492	98634859	15	common
chr15	98634752	98634774	AGCCAGGCAAGGAGGAAGG	-	chr15	98634492	98634859	15	common
chr15	99246473	99246497	GCAGGGTTGGAAACTGAACCC	+	chr15	99246244	99246618	10	common
chr15	99532474	99532495	CGTCCTCCAACCGCGTGG	+	chr15	99532328	99532597	15	common
chr15	99555802	99555825	CACTAGTGCTGGTCCAGCTA	+	chr15	99555781	99555993	15	common
chr1	60215496	60215518	GTTTGCTTCTGCCCTCTGC	-	chr1	60215414	60215621	10	common
chr1	60486004	60486027	AATGCCTTGTCTTGGAAGGC	+	chr1	60485819	60486117	15	common
chr16	10417169	10417191	GTCTTGAGCCACCCGATGT	+	chr16	10416955	10417287	14	common
chr16	13025778	13025801	ATTTGCTTCTTGCACAGGTG	-	chr16	13025611	13025859	11	common
chr16	13130342	13130364	GGCAAAGCTGAAGAAGTGT	+	chr16	13130340	13130856	16	common
chr16	13130663	13130685	GCGGATGGATGATGGTCAG	-	chr16	13130340	13130856	16	common
chr16	13130665	13130687	AAGCGGATGGATGATGGTC	-	chr16	13130340	13130856	16	common
chr16	13130710	13130733	CCTGACGCGGGTACTGCACG	+	chr16	13130340	13130856	16	common
chr16	14237613	14237634	ATTTCCAGCTGCAGAGGT	-	chr16	14237460	14237999	14	common
chr16	15838721	15838744	GTGCCCACAAAGTCCAGAAG	+	chr16	15838571	15838933	12	common
chr16	16896598	16896621	AGGCAGCAGAGGTGCGCCCG	+	chr16	16896443	16896760	16	common
chr16	17293015	17293038	AGAATGGCATCCTGTCGAGG	+	chr16	17292757	17293329	16	common
chr16	18172552	18172575	GGGCCCCAGGGATAGGTCAT	+	chr16	18172562	18173078	16	common
chr16	18590715	18590737	GCGGCGGCCGGTGCAGGTG	-	chr16	18590621	18590791	10	common
chr16	18678565	18678588	GCAGAGCCTAGTTGCCAAGC	+	chr16	18678452	18678922	16	common
chr16	20302550	20302573	GGTGGCGCTGGTCTGAGAAG	-	chr16	20302470	20302662	16	common
chr16	20426354	20426377	CGATGTTCGCGAGCGTGCCC	-	chr16	20425936	20426495	16	common
chr16	20709466	20709489	GAGTAATCGGGCCTGCCAGC	+	chr16	20709370	20709718	16	common
chr16	20709528	20709551	CCAAATGCAGCTATGGACTG	+	chr16	20709370	20709718	16	common
chr16	21412911	21412933	AATGACCACTAGGTGGCAG	-	chr16	21412762	21413305	15	common
chr16	21488633	21488657	GCTAATTTGTGTCCTGCCAGC	+	chr16	21488259	21488854	14	common
chr16	22555218	22555240	TAGCTGCCATGCAGGTGCT	-	chr16	22555193	22555339	13	common
chr16	23403583	23403606	GGTCACATGACTCAACTGGA	+	chr16	23403001	23403594	12	common
chr16	23991413	23991436	TGGGGGCGCTGCAGAGCAAA	+	chr16	23991135	23991582	15	common
chr16	27468984	27469007	GTTTGTAAGTAACTACAGCT	-	chr16	27468864	27469145	13	common
chr16	28490808	28490831	GCCACCTAATGGTCAGAAGT	+	chr16	28490668	28490977	14	common
chr1	62866944	62866967	CTCATGTGTGCAGGTGCCTG	-	chr1	62866797	62867168	11	common
chr16	30252336	30252359	GGTAGAACGACTTTCCGCGG	-	chr16	30252149	30252584	16	common
chr16	30252408	30252431	GTCACGGCCAGATGTGTGCT	+	chr16	30252149	30252584	16	common
chr16	30539697	30539718	GCAGGCTGCTCAGGAGGC	-	chr16	30539189	30540001	16	common
chr16	30940907	30940930	GTGGAAAGAGGGGGAAGAGA	+	chr16	30940891	30941078	13	common
chr16	30941064	30941087	GGGCTAGAGAAAAGGCTCAG	-	chr16	30940891	30941078	13	common
chr16	30977459	30977482	AGCCAATCAGCCTGGGGTGG	+	chr16	30977459	30977748	16	common
chr16	31425826	31425849	CACGTCCAGACGGAAAACCT	-	chr16	31425432	31425943	16	common
chr16	31878810	31878831	GCCGGCAGGGGGCAGAGG	+	chr16	31878706	31878948	16	common
chr16	31933100	31933123	GTGACGCGTCCCTGCGTGGT	+	chr16	31932466	31933186	15	common
chr16	31944270	31944293	CTTGCGCAGGCTCGCGTTCT	-	chr16	31944031	31944436	16	common
chr16	32115522	32115545	GCGGGAGGTGCTCGCGCTAG	-	chr16	32115368	32115779	16	common
chr16	32115523	32115545	GCGGGAGGTGCTCGCGCTA	-	chr16	32115368	32115779	16	common
chr16	32175180	32175203	GGAGTAGAGACAGAAAAAGG	-	chr16	32175180	32175441	10	common
chr16	32273577	32273600	CTGCTGTCTTACTGATGGGA	+	chr16	32273456	32273917	14	common
chr16	32697298	32697320	CATCCCTGTCCTGTGTTGT	+	chr16	32697242	32697585	13	common
chr16	32813228	32813252	AAGGACACTGTCCTGTGCTGG	-	chr16	32813080	32813957	15	common
chr16	33337536	33337559	GGGAGGGCCGCAGTCTCTGG	+	chr16	33337418	33337704	16	common
chr16	33798118	33798141	AGACCAGATTGTCCACATTG	-	chr16	33798091	33798527	14	common
chr16	33951099	33951122	GGGGGCAGCAGGACACCACT	-	chr16	33950983	33951268	14	common
chr16	33988597	33988620	CCCATCTGTGCGATTAAGCT	+	chr16	33988434	33988822	16	common
chr16	34125432	34125454	GAGGCAGCAGACATGGCTG	+	chr16	34125266	34125933	14	common
chr16	35628453	35628476	GCCAGGACCGGCCCAGTTAG	+	chr16	35628342	35628683	16	common
chr16	35817568	35817591	TCCCTCCCGTGACCAGCAGG	-	chr16	35817423	35817984	16	common
chr16	35862335	35862358	GTGCCAGCAGAGGCCAGTAG	-	chr16	35862141	35862548	12	common
chr16	38812884	38812908	GTGGGCAAGGTCTGAGACTGT	-	chr16	38812748	38813083	16	common
chr16	38902345	38902368	TAGGCGTCGCACTGGAGTCG	+	chr16	38902176	38902476	15	common
chr16	38902371	38902394	CACTCGCCGAGCGGTCTCCA	-	chr16	38902176	38902476	15	common
chr16	38902441	38902464	GGGGGAGTGGCTGCGGCGGC	+	chr16	38902176	38902476	15	common
chr16	44299756	44299779	CTCAAAGGTACAACTGGCAA	+	chr16	44299536	44299840	12	common
chr16	45967790	45967813	GAATGACCAGCAGGTGGCGC	-	chr16	45967707	45967924	14	common
chr16	4608004	4608027	GTGAGCTTTGGCTGCCACCA	-	chr16	4607780	4608331	16	common
chr16	4608005	4608028	AGTGAGCTTTGGCTGCCACC	-	chr16	4607780	4608331	16	common
chr16	4608076	4608099	GTTCTTGCAGAGCCTTGCCT	+	chr16	4607780	4608331	16	common
chr16	4863138	4863161	TGGCACTGGCTGGCCTTATT	-	chr16	4862943	4863462	16	common
chr1	65224896	65224919	GTCCTGGCAGTGCTGAGAGG	-	chr1	65224761	65225108	15	common
chr1	65435109	65435132	CCCCATCTGTGACTGGCTGC	-	chr1	65434892	65435240	13	common
chr16	5471669	5471692	GTTATTCCCCAGCGGCTCAT	-	chr16	5471416	5471704	14	common
chr16	57167167	57167190	AGCTGGTCAGCTTGCGGGTT	-	chr16	57166728	57167266	16	common
chr16	57363416	57363439	GGGAAAGGGACTGAGAGGAG	-	chr16	57363172	57363449	12	common
chr1	66885277	66885301	AGAACACCCAGTTTTCTCTGG	+	chr1	66885104	66885430	13	common
chr16	87747121	87747144	CCGGTCATTGCACGTATAGA	-	chr16	87746912	87747582	14	common
chr16	88851819	88851842	CCTCAAAATAAATGGCAGTG	+	chr16	88851593	88852063	13	common
chr16	90387281	90387304	CGGGAACTAGATCCAGGCTG	+	chr16	90387109	90387448	11	common
chr16	91023801	91023824	GTACACCTGCAGGCCAGCAG	+	chr16	91023704	91024065	10	common
chr16	91512797	91512820	GTCACTGAAGGTGCATTGAC	+	chr16	91512629	91512949	16	common
chr16	91918170	91918193	GTGGCCATTTCCGCACTGTG	+	chr16	91918131	91918371	15	common
chr16	91935530	91935553	GTTTAACTCCCAGCAACCAC	+	chr16	91935327	91935780	14	common
chr16	92287078	92287101	GGCAGCTTGAGTCCCTTTCT	-	chr16	92286895	92287127	14	common
chr16	92421934	92421957	GTCTTAGTGCTTTAGTGCTG	-	chr16	92421777	92422079	11	common
chr16	94553669	94553692	CTGCTGAAGGTGACCTGCAG	-	chr16	94553506	94553950	13	common
chr16	94840273	94840296	GTGTGGAGGTCAGAGGACAG	+	chr16	94840257	94840419	14	common
chr16	96205564	96205587	CCTGCATGCTCTTTCTGGGT	+	chr16	96205357	96205658	13	common
chr16	96373355	96373376	GCCACAGCGGCCACCAGG	-	chr16	96373097	96373539	15	common
chr17	23843220	23843243	CTGCAGCCAGGTGCCTGGGG	-	chr17	23843076	23843634	16	common
chr17	23843310	23843333	AAGCAGGGAGGGCCAGGGCA	+	chr17	23843076	23843634	16	common
chr17	23966556	23966579	GCTCTTGCAGGGAATGTGAG	+	chr17	23966253	23966586	14	common
chr17	24310539	24310562	AGTGAGGCAGCTCTGCCACT	+	chr17	24310185	24310673	13	common
chr17	24380710	24380731	CCCACAGATGCCAGTAGA	-	chr17	24380632	24380854	12	common
chr17	24527000	24527023	AGCACACACAGATTGTCTCC	+	chr17	24526872	24527138	14	common
chr17	24528391	24528414	CCTATGGCTTGGGTGCAGCA	+	chr17	24528055	24528648	15	common
chr17	24574399	24574421	TCCGCCTCCCGGTGCCCGA	-	chr17	24574133	24574592	12	common
chr17	24650861	24650883	GTCTGCAGAAGGTGTGCTG	+	chr17	24650667	24650906	13	common
chr17	25254367	25254390	GTCCTCTGGTGGCCTAGCTG	-	chr17	25254149	25254489	11	common
chr17	25471058	25471081	TGGCGCTGCAGGATGGGAAG	+	chr17	25470926	25471303	15	common
chr17	26257361	26257384	AGTAGACAGAGGCCTCGACC	-	chr17	26257184	26257494	15	common
chr17	26370260	26370283	GGAGGCCAAAGGTACCAAAG	+	chr17	26369898	26370344	12	common
chr17	27139036	27139059	GCGCTGGATTCCTCTGGCTC	+	chr17	27138842	27139255	13	common
chr17	27169877	27169900	CGCCGCTGCAAAAGAAGTTT	+	chr17	27169789	27170102	15	common
chr17	27170067	27170090	CTTGGAGCTGGGTGGGGCCG	-	chr17	27169789	27170102	15	common
chr17	27588887	27588910	CGCCTTGAGGAAGTGGCTGA	-	chr17	27588689	27589077	11	common
chr17	27729400	27729423	GTGCTTGTGTAGGCCAGAAG	-	chr17	27729250	27729520	11	common
chr17	27775814	27775837	CTAGGTTCTTGGGCCTCCTA	+	chr17	27775831	27776179	14	common
chr17	27839556	27839579	CGAGGCGGGAGGTGGGAGGC	+	chr17	27839495	27839773	14	common
chr17	27839590	27839613	AGGCCAGGGCCGGGATCACA	+	chr17	27839495	27839773	14	common
chr17	28185560	28185583	GCAGTGTCTGGGCTTGTGTG	+	chr17	28185293	28185725	15	common
chr17	28222077	28222100	AGACTGTCGAGGGAGAACCT	+	chr17	28221952	28222107	15	common
chr17	28243481	28243502	CCCAGGATGGCCAGAAGG	+	chr17	28243288	28243674	13	common
chr17	28350079	28350102	GTTGTGCTCTGAAATGATCT	+	chr17	28349949	28350476	12	common
chr1	72901678	72901700	GTTACACATGCTGCCACAT	-	chr1	72901320	72901798	13	common
chr17	29046699	29046722	CCTCCTGCAGGTGGCGCTGG	+	chr17	29046674	29046911	14	common
chr17	29508162	29508185	CTGGACATTGCTGGACATGG	+	chr17	29508026	29508237	15	common
chr17	29751300	29751322	GTTCATTGCTGCTGGATCT	+	chr17	29751300	29751699	15	common
chr17	29910651	29910674	ATCATCAGTCCGTGAGATGG	+	chr17	29910442	29910681	15	common
chr17	30020098	30020121	TGCCTGTGAGCCAGAGAGGT	-	chr17	30019907	30020198	15	common
chr17	30020099	30020121	TGCCTGTGAGCCAGAGAGG	-	chr17	30019907	30020198	15	common
chr17	31011534	31011557	GAGTGGTCGACCTGGGAAAC	-	chr17	31011049	31011795	12	common
chr17	31432215	31432236	TGTGGCGCGGGTGGGCTG	+	chr17	31432026	31432549	14	common
chr17	31432215	31432237	TGTGGCGCGGGTGGGCTGT	+	chr17	31432026	31432549	14	common
chr17	31822498	31822520	AGATGCTGCTCCTGTTCTG	+	chr17	31822476	31822723	15	common
chr17	32210413	32210436	TGGAGCAGTGTCAGAGGCCC	-	chr17	32210311	32210687	15	common
chr17	32280354	32280377	CAACACCCCAGGCTGTGGCT	-	chr17	32279994	32280495	15	common
chr17	33690095	33690118	GCAGCACATCTGGCGGAAGT	-	chr17	33689985	33690400	14	common
chr17	34105480	34105503	TGTCCGGGTCACACTGAAGA	-	chr17	34105463	34106241	15	common
chr17	34105621	34105644	CATGGCCACGAGGGGGCAGC	+	chr17	34105463	34106241	15	common
chr17	34118311	34118333	GGAAGGCAGAGTACATGGG	-	chr17	34118111	34118315	10	common
chr17	34272246	34272269	GGGAGGGTCTGAGAGCCATG	+	chr17	34272161	34272528	15	common
chr17	34272344	34272367	GTGGAAGGTCGGGCTCCAGC	-	chr17	34272161	34272528	15	common
chr17	34423008	34423031	GTGGAGAGTGGACACAGCTG	-	chr17	34422753	34423293	12	common
chr17	34692673	34692696	TGGCAATGTGACCAGGTCAT	+	chr17	34692444	34693032	15	common
chr17	34756160	34756183	CCAATTGCTAATGCAAGCGT	+	chr17	34755973	34756299	13	common
chr17	34790959	34790983	CAGAACCCTCTCCATAGCCAG	-	chr17	34790950	34791363	14	common
chr17	35462226	35462248	GTGGAAGGGAACACAGGGC	-	chr17	35461974	35462287	10	common
chr17	35650935	35650958	GTCTCCTCCAGAGAGGATCT	+	chr17	35650905	35651341	13	common
chr17	35694008	35694031	GAGCCCTCTAGAGGCACGGG	-	chr17	35693699	35694265	14	common
chr17	35772468	35772490	GGGGCCAAAATGAGGAGGG	-	chr17	35772210	35772928	14	common
chr17	35772753	35772776	GACGAGGAGCGGGGAGGAAG	-	chr17	35772210	35772928	14	common
chr17	35843058	35843081	GGAGAAGCTGGCACAGGGTT	+	chr17	35842616	35843181	13	common
chr17	35966753	35966776	AGGGTACTTGAGTCATGGCT	-	chr17	35966595	35966974	15	common
chr17	35966791	35966815	CCAAGACGAAGCAGCAGATCG	+	chr17	35966595	35966974	15	common
chr17	35966801	35966824	GCAGCAGATCGAGGAGCAGC	+	chr17	35966595	35966974	15	common
chr17	35973456	35973479	CTTGAGAGGTAGACGATCTA	+	chr17	35973219	35973536	13	common
chr1	73948312	73948335	GCTGCAGTGGCGTGGGAAGG	-	chr1	73947899	73948488	13	common
chr17	43149838	43149861	GCAGAGGGCGCCAGGTCCCC	+	chr17	43149725	43150117	15	common
chr17	45511432	45511456	GGAGCAGTGGCCACATGTCTG	-	chr17	45511265	45511646	15	common
chr17	45653708	45653731	GGGGATGTGATGATGGGTTT	-	chr17	45653262	45653803	13	common
chr17	45700702	45700725	CACTCTGTGTGGGTTGGGTT	+	chr17	45700701	45700973	14	common
chr17	45700850	45700872	GGGGGCTGAGGCGGGGAGG	+	chr17	45700701	45700973	14	common
chr17	45723502	45723525	CCTGCTCTTGCGGAAGACCC	+	chr17	45723400	45723773	11	common
chr17	45723698	45723722	TGGGAATTTACTCTGTAGACC	-	chr17	45723400	45723773	11	common
chr17	45792935	45792958	CTATAGGCTCCATCTGCTGG	-	chr17	45792836	45793074	12	common
chr17	45800545	45800568	GGCGTTACCGATAAAGGCTG	+	chr17	45800010	45800729	16	common
chr17	45885595	45885618	GGGGCGCTGCTTGGGCACCT	+	chr17	45885396	45885810	15	common
chr17	46164722	46164745	GCGGACTCAGGGTTGGGCAG	+	chr17	46164694	46164907	15	common
chr17	46473603	46473626	TGCGCCTGCAGGCCAGAAGA	+	chr17	46473445	46473763	11	common
chr17	47041036	47041059	AACCGCGCAGGGCAGAGCAG	-	chr17	47040862	47041281	15	common
chr17	47283801	47283823	GGGGTGTGAGTCACCATGT	+	chr17	47283447	47284101	15	common
chr17	47523719	47523742	GCATGTGCATGCAGTGCCTG	+	chr17	47523563	47523889	15	common
chr17	4778357	4778380	GCCCTCTGGTGGCCGCATCC	-	chr17	4777939	4778473	16	common
chr17	47873944	47873966	TGGGGGGCGGTCCGCAGGA	+	chr17	47873678	47874181	15	common
chr17	47873948	47873970	GGGCGGTCCGCAGGAGGGG	+	chr17	47873678	47874181	15	common
chr17	47874166	47874188	CGGGCGGCGGGCGAAGCTC	+	chr17	47873678	47874181	15	common
chr17	47881863	47881886	GGAGAGGGCATCAGAGACCC	+	chr17	47881810	47882223	10	common
chr1	74795498	74795521	CGGCAGGCCCTTGAGAGATC	+	chr1	74795415	74795829	14	common
chr17	48001598	48001621	CCTTGAGCACGCAGCGCCGC	+	chr17	48001311	48002029	15	common
chr17	48001797	48001819	CCGGGGTGAGGATGGGGGT	+	chr17	48001311	48002029	15	common
chr17	48001808	48001831	ATGGGGGTGGGGCGCGACAC	+	chr17	48001311	48002029	15	common
chr17	48010698	48010721	GACGAGGAGGAGGAAGTGGG	-	chr17	48010474	48010823	15	common
chr17	48247663	48247686	GGAACTGTGAGCCACCACGT	-	chr17	48247547	48248128	12	common
chr1	74854821	74854843	CTCACATCTGGTTGGCAGC	+	chr1	74854762	74855067	15	common
chr17	48606988	48607011	CCTGATGCAGGGCAGATGAC	-	chr17	48606903	48607340	15	common
chr17	48607072	48607095	GGGCGCGGGAGTCTGGGAGA	+	chr17	48606903	48607340	15	common
chr1	74927493	74927517	GGCCGGTCTATGGCTAAATCT	-	chr1	74927305	74928090	15	common
chr17	5026747	5026770	CTGGCTCTGATTTCAGTCTC	+	chr17	5026658	5026937	12	common
chr1	75178936	75178959	CCGTCTGTAACCCCAGCCCC	-	chr1	75178871	75179085	11	common
chr1	75248458	75248481	GTCGGAGCACATCTGGTGCG	-	chr1	75248148	75248472	15	common
chr1	75464400	75464423	TGGTCGTGGAGACATGAGCC	+	chr1	75464251	75464677	15	common
chr1	75474003	75474026	CGGCCGCAGGACTTCATCGG	-	chr1	75473762	75474290	15	common
chr17	5535488	5535511	GTGGCTGTGAGGTACAATGT	-	chr17	5535332	5535642	14	common
chr17	5535525	5535547	CTGGGGTAGAGGTGGGGAT	+	chr17	5535332	5535642	14	common
chr1	75556233	75556256	GAGGGCTACACACGGCCGGC	-	chr1	75556091	75556428	15	common
chr17	56096708	56096730	GCCCACTGAGGCCAGACGA	+	chr17	56096423	56097071	15	common
chr17	56176097	56176119	GCCGTTGTAGGGTGGGGTG	-	chr17	56175938	56176497	15	common
chr17	56271448	56271471	CTTGAGAAACCGCCAGCAGG	+	chr17	56271307	56271659	15	common
chr17	56274340	56274363	GAGGGAGGCAAAGGACCGAA	-	chr17	56274046	56274362	15	common
chr17	56403526	56403549	GGGGTGGGGAGGCACCTCAG	+	chr17	56403499	56403903	15	common
chr17	56403745	56403768	CTGTGATCCCAGTGCTGAGG	-	chr17	56403499	56403903	15	common
chr17	56478502	56478525	GGGGAATGGCATGTGGACCT	-	chr17	56478312	56478669	12	common
chr17	56618944	56618966	GGCAGAGTGGGCTGCAGGA	+	chr17	56618879	56619163	15	common
chr17	56698031	56698054	TGTGGCTCTTGGGTGCCACC	+	chr17	56697967	56698417	15	common
chr17	56876184	56876207	GCGGTTGTGAGCCACTGTGT	+	chr17	56875854	56876277	13	common
chr17	57475347	57475370	AGCGGATCTGGGAGGAGTTG	-	chr17	57475113	57475424	15	common
chr17	57475349	57475370	AGCGGATCTGGGAGGAGT	-	chr17	57475113	57475424	15	common
chr17	63133452	63133475	GTTCAGAGTGGCGGCCAGCA	-	chr17	63133257	63133977	15	common
chr17	65908843	65908866	GGTGGCTATGGGGTGAGCGA	-	chr17	65908575	65908960	15	common
chr17	66835265	66835288	AGGAAGTCTGGGGCAGTGCA	+	chr17	66835113	66835506	15	common
chr17	66839565	66839588	GTGTGTCTTTTCTGTGCCTC	-	chr17	66839360	66839671	13	common
chr17	71104443	71104467	GTTGTTCCGATGTTGGCCACC	+	chr17	71104236	71104634	15	common
chr17	73163423	73163446	GCTGCCATCTAGTGCCCGAC	+	chr17	73163118	73163587	15	common
chr17	73207669	73207692	TATGACATGTGGGCAGCAGG	+	chr17	73207607	73207852	13	common
chr17	80404319	80404342	GTTGCTGTCCTATCTGACAG	-	chr17	80404239	80404496	15	common
chr17	84132383	84132406	GGAGAATGTGCTCTCAATGC	-	chr17	84132157	84132505	15	common
chr1	78416381	78416404	CCAGGCCAGCCCAGTGCAAG	-	chr1	78416234	78416516	14	common
chr17	84266178	84266201	CTCAGCCTGCAGGGCTACCT	+	chr17	84265896	84266346	15	common
chr17	84513308	84513331	GTCTAGGCAGCATGAAGTCC	-	chr17	84513182	84513538	15	common
chr17	86463061	86463084	GTCATTGTTTGGAATAGTGC	-	chr17	86462940	86463158	15	common
chr17	88348556	88348579	GCAGACCAAGAGTGGTTGTG	+	chr17	88348293	88348721	15	common
chr17	88357891	88357914	GGAGCGGGTCACTGGAGAAT	-	chr17	88357654	88357936	11	common
chr17	89052611	89052634	GTCGGGATGGAGTTGTACTA	+	chr17	89052257	89052938	15	common
chr17	9362295	9362318	GACGAGATGGAAAGGGGTGG	+	chr17	9362284	9362517	10	common
chr18	10617720	10617742	AGCACTCCTCCCGTCGCTA	+	chr18	10617531	10617861	16	common
chr18	10885956	10885979	AACCTCCCTGCTTGGCCACT	-	chr18	10885768	10886147	16	common
chr18	13106481	13106504	AGTGGGAGCAGATAAAGCGG	+	chr18	13106415	13107000	10	common
chr18	15110006	15110028	TGAGCAGCAGAAGGGAAGG	+	chr18	15109848	15110259	10	common
chr18	20904707	20904728	CGCACGGCCGGGGCCCGG	+	chr18	20904615	20904878	10	common
chr18	21135414	21135436	GTGCTATCAGCAGAGCCCT	+	chr18	21134955	21135487	15	common
chr18	24204459	24204482	GACTCTGGAGGCCTGGGTGT	-	chr18	24204017	24204507	15	common
chr1	82800397	82800419	CTTTGCAAGCCCATTCTCC	-	chr1	82800064	82800585	14	common
chr18	34418971	34418994	CTCGGAGCTGGAGTTCCAGG	-	chr18	34418845	34419283	15	common
chr18	34936602	34936625	CCCCCCGTGGCCGGGAGCGG	-	chr18	34936319	34936635	15	common
chr18	35048717	35048740	AACTGCCCTCGACCGTGAGG	-	chr18	35048584	35048815	15	common
chr18	35181668	35181691	CCTGAATGAAGGCAACTGGG	-	chr18	35181403	35181885	15	common
chr18	35692783	35692806	TGGGTGCCTAGTGCCTGCAG	-	chr18	35692596	35692967	15	common
chr18	35884781	35884804	GGGGGGAACACAGGAAGAGG	-	chr18	35884431	35884788	12	common
chr18	35911957	35911980	GCTACAGCCGCCGTGGCTCT	-	chr18	35911815	35912066	15	common
chr18	36022872	36022895	AGTACTTGGTGCTCTCACAA	+	chr18	36022811	36023086	11	common
chr18	36023052	36023075	GCCTTCACAGCTGGGATTAC	-	chr18	36022811	36023086	11	common
chr18	36488361	36488383	GTTGTAGTGGACACTGCAT	+	chr18	36488192	36488857	15	common
chr18	36646980	36647003	GTCATCATGATGGGGGAAGG	-	chr18	36646825	36647342	11	common
chr18	38095269	38095292	TGGGGGGTGAGATAGAGAGT	+	chr18	38095058	38095586	15	common
chr18	38497906	38497929	GGGGAAGGCAGGGGCTGAGA	+	chr18	38497573	38498234	15	common
chr18	38497918	38497941	GGCTGAGAAGGCTGGGGACT	+	chr18	38497573	38498234	15	common
chr18	38498038	38498060	GTGGGGTCAGTCCTTGGCT	+	chr18	38497573	38498234	15	common
chr18	39100228	39100251	AGATACTCATGGCTGAGTTG	-	chr18	39099878	39100313	13	common
chr18	3982444	3982467	CGGGCAGAGCGCCCCCTTGT	+	chr18	3982146	3982615	14	common
chr1	84878011	84878034	GGAGAGGGCACTGGATTCCG	-	chr1	84877911	84878117	11	common
chr18	49915295	49915318	CGGGGCTCAGAGGTGCCGTG	+	chr18	49915147	49915407	14	common
chr18	50192539	50192561	CTGGGATCCACGGGGCAGG	-	chr18	50192253	50192958	15	common
chr18	5155549	5155572	CTTGCATTTGATTCCCACCT	+	chr18	5155444	5155812	13	common
chr18	5162285	5162308	GCCGGAGGTTCGAGGGAGTG	+	chr18	5162077	5162509	16	common
chr18	56894817	56894840	GCCATCTAGAGGTGTGAGAT	-	chr18	56894586	56895069	14	common
chr18	61102255	61102278	AGGGGGGTCAGCACAACAGG	-	chr18	61101843	61102420	15	common
chr18	61806963	61806986	TCACAAGGTGCTCCTGCAGT	+	chr18	61806820	61807275	15	common
chr18	61807044	61807067	TGGATTTGGAGGGCAGCCAC	-	chr18	61806820	61807275	15	common
chr18	61857889	61857913	CAACACTAGAGGGCACTGTCG	-	chr18	61857701	61858128	15	common
chr18	62071440	62071463	ATCATGGATGGCGAGCTCTC	-	chr18	62071402	62071562	14	common
chr18	62104432	62104453	TGAGGGTCTGGGGGTGGT	+	chr18	62104292	62104691	15	common
chr18	62845231	62845254	CAGAGGTGGATTGCTTTCAG	+	chr18	62844969	62845331	15	common
chr18	63132570	63132593	CGCCACCGTGTGTTAACTAG	+	chr18	63132500	63132811	15	common
chr18	6490137	6490160	GTGGTCTCAGTTCTTGGGTT	-	chr18	6489916	6490193	15	common
chr18	65046778	65046801	GTGTGTACTCAGCGCGGGCG	+	chr18	65046708	65046963	15	common
chr18	65181829	65181852	CCAAGGACCACCAGCAGATG	+	chr18	65181643	65181902	14	common
chr18	66081684	66081707	CAGCTTTGGAACTTCACCTG	+	chr18	66081612	66082033	14	common
chr18	66094928	66094949	GCCACCGCTGCCCGGAGG	-	chr18	66094477	66095018	13	common
chr18	67430784	67430807	GTACACCTGCGCACCAGAAG	-	chr18	67430683	67430915	10	common
chr18	67438261	67438283	CAGACACCTGGTGGCGCTG	+	chr18	67438150	67438561	15	common
chr18	69730926	69730948	CGGCTCTGAGGTGGGATGC	-	chr18	69730783	69731012	15	common
chr18	74939942	74939965	CCCCGGTGGCTTGTCTGCAG	-	chr18	74939692	74940043	13	common
chr18	75425973	75425996	GTTGCCCTTGCAGAGGCCCT	+	chr18	75425817	75426393	14	common
chr18	75767573	75767596	CACATGGCAAGGCTAAGTGG	+	chr18	75767454	75767738	15	common
chr18	76194291	76194315	AAACCTCGGCAGCAATGTTTG	-	chr18	76194180	76194485	13	common
chr1	87633217	87633240	GAGACCCGAGAGAGGGAACG	-	chr1	87633097	87633820	13	common
chr18	77166408	77166431	CACCCTCTTCTGGCAGATTC	-	chr18	77166310	77166553	11	common
chr1	87750022	87750045	GGGTGCTAGGCAGGCTGTTT	-	chr1	87749795	87750309	15	common
chr1	87832258	87832281	ATTCCCAGTGACCACACGGT	-	chr1	87832086	87832781	15	common
chr18	79786058	79786081	TGTGACCCCTAGTGGCCAAG	+	chr18	79785903	79786285	10	common
chr18	80366800	80366823	GTGGTTCTGAGCTGTGGCGT	-	chr18	80366541	80366953	15	common
chr18	80911457	80911480	GTGAAGATGCTGGGAGGGCA	+	chr18	80911418	80911603	11	common
chr1	88110856	88110879	AGGCAGGGAACTGGGCTGCT	-	chr1	88110513	88111195	15	common
chr1	88110893	88110916	GGGCTGCAGGTGGCACTAGT	+	chr1	88110513	88111195	15	common
chr18	82902987	82903009	CAGGGCCTGAGTTCTGTAG	-	chr18	82902992	82903312	14	common
chr18	82920624	82920647	GGAAAGGAAGGAGAAAGAGG	+	chr18	82920576	82920937	15	common
chr18	82920716	82920739	GTGCTGTGATCCTGCGGCTT	-	chr18	82920576	82920937	15	common
chr18	82936636	82936659	GGCGCCATTCGTAGCGGGCC	+	chr18	82936479	82936898	15	common
chr1	88301225	88301247	GGGCATAAAGTGTGGGGGT	+	chr1	88301236	88301780	14	common
chr1	88301627	88301650	TGTACATGCAGTGCCTGCTG	-	chr1	88301236	88301780	14	common
chr1	88367983	88368006	CTTTGCTTCCACACCATGTC	+	chr1	88367995	88368248	13	common
chr1	88368215	88368238	GCTGCTCTTCCTGGGGAACC	-	chr1	88367995	88368248	13	common
chr1	88368222	88368245	GGCACTTGCTGCTCTTCCTG	-	chr1	88367995	88368248	13	common
chr1	88406220	88406243	GTTCCCCAGGTCCCAGGAGG	+	chr1	88405853	88406236	15	common
chr1	88424915	88424938	GCGGGGTGGCAGCGGTGCGC	-	chr1	88424783	88425098	15	common
chr1	88435148	88435171	GGGGAGGTAGCAGCTTTGGA	-	chr1	88435112	88435318	12	common
chr18	85092577	85092600	TGAGGACCAAGATGCATCGG	+	chr18	85092443	85092657	11	common
chr18	85121519	85121542	GTCTCCATGGCGAGCGGACG	+	chr18	85121433	85121750	15	common
chr1	88593726	88593749	GGGGGCTCCCTCTGTGTTCT	+	chr1	88593575	88593856	10	common
chr1	89465113	89465136	CTTACTTCATGCTGGGTTGT	+	chr1	89464990	89465341	13	common
chr1	90353372	90353395	GGATGAAGGAGAGACAACTA	-	chr1	90353211	90353583	13	common
chr1	90673720	90673743	ATGGTTGTGAGCGGCCATCT	-	chr1	90673658	90673984	11	common
chr19	10066198	10066221	CACCTCCTGATGGGCGGGAA	+	chr19	10065876	10066202	15	common
chr19	10109504	10109526	GAGACATTTGCCCTACCAC	-	chr19	10109380	10109624	15	common
chr19	10315253	10315276	GCGGGGCGCGGGGCAGGCGG	-	chr19	10315237	10315561	15	common
chr19	11119560	11119584	GGCCTCTCTGCGCTCTGGCGG	-	chr19	11119419	11119655	13	common
chr19	14524431	14524454	CCAAGTACATCTGCAGATAG	+	chr19	14524324	14524578	12	common
chr1	91627323	91627344	GGCAGATGTGGGATGTGG	-	chr1	91627115	91627452	12	common
chr1	91835991	91836014	ATTGCTTGTGAGGTCCTTAG	-	chr1	91835837	91836110	10	common
chr19	22412088	22412111	ATTTATTGGACACTGCCATC	-	chr19	22411903	22412241	10	common
chr19	24346364	24346386	CGGATTGGGAGTGTGGAGG	+	chr19	24346364	24346631	14	common
chr19	32046646	32046668	GAGGCTTTGACGTGCACAT	-	chr19	32046524	32046876	15	common
chr1	93262890	93262913	GAGGAGGCGGGCGCCCGATC	-	chr1	93262458	93263163	14	common
chr19	3355427	3355449	CCCTGAGCCATGAAGGGGA	+	chr19	3355037	3355484	13	common
chr19	3437074	3437097	AGTCCCCATTGTGGCCGGTG	-	chr19	3436963	3437238	15	common
chr19	36972444	36972467	GACGCCCTCTTCTGGCAGGC	-	chr19	36972163	36972568	12	common
chr19	3719641	3719664	CTCTCCTGGTCAGGGTCAGT	-	chr19	3719153	3719656	16	common
chr19	3724946	3724969	CTGGCACACAGGTGTACTGC	-	chr19	3724761	3725062	13	common
chr19	37493068	37493092	GGATAACAAGGTGGTGGGCAT	-	chr19	37492934	37493284	10	common
chr19	38893746	38893769	GGGACTTCCTCTTCGGGCGG	+	chr19	38893642	38894108	15	common
chr19	3980581	3980604	CTCAGTGTAAGGAGGAGCTG	+	chr19	3980400	3980786	14	common
chr19	4052211	4052233	AGGGTCGTTCCTATTCACC	+	chr19	4051967	4052411	16	common
chr19	41146172	41146195	GTGTCAAGTCAGACAGCAGG	+	chr19	41146086	41146451	15	common
chr1	94257071	94257094	CGCCGCCTTGTGGTCTTATC	+	chr1	94256919	94257371	15	common
chr19	4279807	4279830	ATCCGAACTGTCACTGTAGC	-	chr19	4279578	4279820	10	common
chr19	4283263	4283285	GGGGTGCTGTCCAGTCTCC	+	chr19	4283202	4283470	16	common
chr19	42852610	42852633	GTCAGAGGATGAGGAAGAGG	-	chr19	42852340	42852655	13	common
chr19	42869467	42869490	AGCAAGAGAGGAGTAGGGTC	+	chr19	42869440	42869690	15	common
chr19	43645629	43645652	AGGCCTTTCAGGGCAGTTGC	-	chr19	43645553	43645817	15	common
chr19	44369378	44369401	CCCCTCTCATTGCAGATCTC	+	chr19	44369217	44369607	15	common
chr19	44561954	44561977	CCCCTTGCTGCTGTGGCATT	-	chr19	44561811	44562176	14	common
chr19	44657191	44657213	TAGGAGGCAGTGAGGTGGG	+	chr19	44657024	44657527	15	common
chr19	44962682	44962704	GGGAGGGACAAGATGGCAT	-	chr19	44962136	44962699	15	common
chr1	94507760	94507783	AGGATAGGCTAGGGCCATGC	-	chr1	94507663	94507996	14	common
chr19	45151410	45151433	GGATGCGTGCGGCTGCTGCT	+	chr19	45151344	45151510	13	common
chr19	45155977	45156000	CTGGTGGATACTTCTGGTAG	+	chr19	45155850	45156392	15	common
chr19	45251627	45251650	CCCTGTCATCGGCGATTCCT	+	chr19	45251522	45251800	15	common
chr1	94544452	94544475	AGGCCCCTTGTTATCTCCCG	+	chr1	94544231	94544821	15	common
chr1	94544680	94544703	TGGGACAGCTCAATGGATGA	-	chr1	94544231	94544821	15	common
chr19	45887800	45887823	CTGTGTGTGCGCGAAGGGTA	+	chr19	45887636	45888018	15	common
chr19	45887939	45887962	CACGGGGGCGCTCCATCCCC	+	chr19	45887636	45888018	15	common
chr19	45888015	45888038	GTCCTGACTGGCCATGCCCC	-	chr19	45887636	45888018	15	common
chr19	46211863	46211886	AGAACATGGCTGCAAGGGGC	-	chr19	46211759	46212090	15	common
chr19	46662493	46662516	GACAAAGGTACGTACGAATG	+	chr19	46662418	46662716	15	common
chr19	47413900	47413923	GGAGGCTTCCTGGGAGCCTG	+	chr19	47413622	47414065	15	common
chr19	47578410	47578431	GCTGGTCTGGTGTGGAGA	+	chr19	47578051	47578542	13	common
chr19	47748991	47749013	CGGCCTGTGGACATGGCTG	+	chr19	47748910	47749394	15	common
chr19	47870194	47870215	CTCGCCGACAGCTGCCGT	-	chr19	47869897	47870264	13	common
chr1	94791885	94791907	GGCAGCCATGGCTAACTGG	+	chr1	94791650	94792073	15	common
chr19	5117416	5117438	GCCATGGTCGTGCCGTCTG	+	chr19	5117077	5117788	16	common
chr19	53094884	53094907	TCATCTCAGCCAGACAGGGT	+	chr19	53094599	53094973	14	common
chr19	53404382	53404405	GGAGAAATGTGCGTGCGTGT	+	chr19	53404084	53404619	14	common
chr19	53827408	53827432	CAGCAATGATGCTGGACAAAC	-	chr19	53827363	53828161	10	common
chr19	5428293	5428316	GTTCTTACAGAGGCCAGAAG	-	chr19	5428133	5428423	10	common
chr19	5488051	5488073	CAACGAACGAAGAGCGGGT	+	chr19	5487849	5488659	16	common
chr19	5568930	5568953	CTTAGCTTCAGGCCGAGACT	+	chr19	5568872	5569079	16	common
chr19	5716337	5716360	GCTGCAGCTGGTGCAACTGG	-	chr19	5716052	5716610	11	common
chr19	5716609	5716632	GTCAGATTTCCCTCTACTGG	-	chr19	5716052	5716610	11	common
chr19	5786620	5786643	GGAGCCCGGCAGCCTTGGGG	-	chr19	5786451	5786658	16	common
chr19	5787368	5787391	GCCAGGCCTCATTTGGCAGG	-	chr19	5786870	5787485	14	common
chr19	5924041	5924065	CTGTAGTACAATGTCGCTAGG	+	chr19	5923864	5924239	16	common
chr19	59463799	59463822	GAGGAGGTGGAGGGAATGGG	+	chr19	59463782	59464050	13	common
chr19	6067077	6067099	CAGGGAGGAGGGTGCAGGG	-	chr19	6067053	6067268	16	common
chr19	60965589	60965612	GCGCGTCTATGGGAACCAGA	-	chr19	60965523	60965972	15	common
chr19	60968278	60968301	GGGACACAATGGTACATCTC	+	chr19	60968191	60968348	13	common
chr19	6268243	6268265	AAGCCACCCGACCCTGAGG	+	chr19	6268199	6268472	16	common
chr19	6268354	6268378	TAGGAAACAGCAGAAGGACGT	-	chr19	6268199	6268472	16	common
chr19	6268408	6268431	GGGTATAGCTCAGAGGCGCC	-	chr19	6268199	6268472	16	common
chr19	6376384	6376407	AGCGCCCCTGGTGGACAGGA	+	chr19	6376217	6376467	15	common
chr19	7011063	7011086	GGTGGGCAGGATGGCTCAGC	+	chr19	7010784	7011206	12	common
chr19	7054020	7054042	AGGGGGCAGCTGGGTGTGG	-	chr19	7053711	7054505	14	common
chr19	7054037	7054059	GTGTGGGTGTGCTGGACAG	-	chr19	7053711	7054505	14	common
chr19	7183304	7183326	GGGGGAGGTCCAGGAGAGA	-	chr19	7183051	7183331	14	common
chr19	7492636	7492659	CGCGTTGCTCGTTTTTTGGG	+	chr19	7492430	7492857	14	common
chr19	8788084	8788107	CGGAGGACGAGACGGAGGCC	-	chr19	8787773	8788144	15	common
chr19	9051164	9051187	CCCGCCATACAGGCCTTCTC	-	chr19	9051118	9051692	14	common
chr19	9067429	9067452	GTCCTGGCTAGGCTGGGAGT	+	chr19	9067281	9067597	15	common
chr19	9995526	9995549	GGGGCACCGTTTCTCTTGTT	+	chr19	9995463	9995678	12	common
chr2	103584473	103584496	AAGGGGCAAGTCTGCGGCCC	-	chr2	103584146	103584502	14	common
chr2	105284422	105284445	CACCTGTAGTCCCACCACTG	-	chr2	105284132	105284619	10	common
chr2	106800711	106800734	TGCTACAATGAATGGATGGA	-	chr2	106800557	106800798	10	common
chr2	11253258	11253281	GTGAGTGTGTGTGATGTGTA	-	chr2	11253070	11253407	13	common
chr2	11585754	11585777	GAAAGCATCAGCACCGCTAG	+	chr2	11585596	11586348	15	common
chr2	115927144	115927167	GGGCAGAAGAACCCAGGAGC	-	chr2	115926901	115927255	13	common
chr2	117089659	117089681	GTCCGATAGAGCAAAGGTG	+	chr2	117089558	117089885	15	common
chr2	118371670	118371693	GGGAGGAGGCAGGAGGTGGC	-	chr2	118371492	118371869	15	common
chr2	118371674	118371698	GAAGAGGGAGGAGGCAGGAGG	-	chr2	118371492	118371869	15	common
chr2	118521560	118521582	CCTGTGGCAATCTGGCAGC	-	chr2	118521442	118521767	15	common
chr2	119014831	119014854	GCTTGTAACTCCAGGGGATC	+	chr2	119014757	119015448	15	common
chr2	119114489	119114512	CGGGAGTCAGCTGAGCTGCC	+	chr2	119114087	119114575	15	common
chr2	119125902	119125925	CAGGCAGTGACGCTGAGACC	+	chr2	119125831	119126149	15	common
chr2	119125957	119125980	GGGAGATCGAGGGCGGCCGC	+	chr2	119125831	119126149	15	common
chr2	120105915	120105938	AGTAGGCAGTAATGGCCACA	-	chr2	120105702	120106043	15	common
chr2	122128822	122128845	TGCCTGCAGAGGCCAGGAGG	-	chr2	122128435	122128912	15	common
chr2	122293565	122293588	CCCTGGGGCCCAGCAGCAGG	+	chr2	122293537	122293873	14	common
chr2	125077785	125077808	GTTGACCCTGCCTGGGACAA	-	chr2	125077586	125078309	11	common
chr2	127715303	127715326	GCCCTCTGGTGGTTGGTCCT	-	chr2	127715174	127715598	14	common
chr2	128221879	128221902	GCACCATGCAGTGCCATTCC	-	chr2	128221764	128222075	15	common
chr2	128238325	128238347	GCGGGCACGTGGTGGGTGG	+	chr2	128237899	128238726	15	common
chr2	128248698	128248721	GTGCCTGTGGTGGCCAGCAG	-	chr2	128248528	128248954	14	common
chr2	129500805	129500826	ATCCCGGTGACCACAAGG	+	chr2	129500675	129501033	15	common
chr2	129993746	129993769	CGAGTGTGGGCCTGGATGCC	-	chr2	129993647	129993945	13	common
chr2	130237732	130237755	GCCGTGTAAAGGCCTTGGCT	+	chr2	130237495	130237889	15	common
chr2	131248538	131248561	ACTGGGCAGGAAGTGGAGGG	+	chr2	131248514	131249305	15	common
chr2	13159451	13159474	GCTAGCTCTGAGTCCTAAGC	-	chr2	13159263	13159475	10	common
chr2	131765380	131765402	GTGATCCTTACGGGCCTGC	-	chr2	131765258	131765757	15	common
chr2	131765380	131765403	GGTGATCCTTACGGGCCTGC	-	chr2	131765258	131765757	15	common
chr2	131765571	131765594	GTGGGGGATGGGGGTACTTG	+	chr2	131765258	131765757	15	common
chr2	131808495	131808518	TGCCTGTCCTGGTTGATGTT	-	chr2	131808262	131808599	13	common
chr2	131965004	131965027	CTCTCTGGGATTGGGGTTGC	-	chr2	131964885	131965202	10	common
chr2	132088676	132088699	AGCAAGTCTAGGCCGCTACG	+	chr2	132088500	132088828	14	common
chr2	132101380	132101403	GCTTGTGTGTGCATGGCCAG	+	chr2	132101301	132101606	11	common
chr2	13459558	13459581	CAGGAAGCCCTGTGTGGAGA	-	chr2	13459457	13459692	11	common
chr2	135156177	135156200	GTGGGGATGGGGAATGGAGT	-	chr2	135156039	135156240	11	common
chr2	150826615	150826638	GCAGCACTGACTGCTCTTCC	+	chr2	150826600	150827043	13	common
chr2	151319967	151319989	GCGGGCGGAACGCAGACCT	+	chr2	151319757	151320103	15	common
chr2	151702130	151702154	GTCACTGTTCAGTTGAGTGGG	-	chr2	151701943	151702211	15	common
chr2	152592560	152592583	CAGAGAAGGAGAGAGAGGGA	-	chr2	152592191	152592570	15	common
chr2	152593656	152593679	GTAAAAGCAGCAGCACCTGT	-	chr2	152593393	152593790	12	common
chr2	152759572	152759595	AGTGACCAATGTGGGGAGGA	+	chr2	152759356	152759793	15	common
chr2	152874132	152874155	ATTGGTGGCGCCCACCCGAG	+	chr2	152873713	152874291	14	common
chr2	152874146	152874169	GCCATTTCCAACCACCTCTC	-	chr2	152873713	152874291	14	common
chr2	153435424	153435446	TGGCCTGCTGACAAGGCGG	+	chr2	153435401	153435596	15	common
chr2	155338336	155338360	GCCAGGACCTTGGTTGGGATT	-	chr2	155338315	155338458	14	common
chr2	155522236	155522259	GTGGCCTGTTGATGCGGATC	+	chr2	155522022	155522384	15	common
chr2	157267277	157267300	GTGGGTGCAGGTACCTGTGG	+	chr2	157266988	157267505	10	common
chr2	157284383	157284406	GGGGACTGCACTGGGAGCGT	+	chr2	157284299	157284527	15	common
chr2	157284498	157284521	CCCAGGACAAGGGAGGATAC	-	chr2	157284299	157284527	15	common
chr2	158110447	158110469	GGTCTACTGGGCTGTTTGT	+	chr2	158110394	158110687	15	common
chr2	158989891	158989915	GATGAACCCGTGTGCGGTGGT	+	chr2	158989781	158990202	13	common
chr2	160868736	160868759	CTTGGTTTCCAGCACCCATG	+	chr2	160868665	160868880	10	common
chr2	160868803	160868826	GTGCCTTTAGAGGCCAGCAG	-	chr2	160868665	160868880	10	common
chr2	162748105	162748128	GTGCATTTGTCGCCACCAAG	-	chr2	162747928	162748276	10	common
chr2	163166008	163166031	GGCTTAATCACACTGTTGGA	+	chr2	163166013	163166387	15	common
chr2	163306303	163306326	GTCAGCCACTGCCTGGAGCG	+	chr2	163306107	163306439	14	common
chr2	163684441	163684462	CGAGAGCCGCGTCCGCGC	+	chr2	163684292	163684588	13	common
chr2	163684458	163684479	GGATGCAGGTGGAGGCGC	-	chr2	163684292	163684588	13	common
chr2	164215222	164215243	GGGATGGGGAGGTGCTGG	-	chr2	164214999	164215673	15	common
chr2	164215287	164215308	AGCTCGAAGGCAGCGCGT	+	chr2	164214999	164215673	15	common
chr2	164215321	164215344	GCAGCCTGGACCGTCCAGGA	-	chr2	164214999	164215673	15	common
chr2	164228596	164228619	GACACCTGCTGGGCAGATGT	-	chr2	164228262	164228917	15	common
chr2	164286394	164286417	GGCCCCTTTGGATGGCGTGT	+	chr2	164286238	164286471	15	common
chr2	164504830	164504854	CCGCCCTTTTGTGAGAACAGC	+	chr2	164504647	164504973	14	common
chr2	164776086	164776109	GTCAAGGAGAGGAGGTGTGG	-	chr2	164775844	164776368	12	common
chr2	164900556	164900578	GTTGGGGTGGCAGAGATGG	+	chr2	164900415	164900708	15	common
chr2	165312921	165312944	GGGCTGCTCCATCAGGGCTG	+	chr2	165312788	165313066	15	common
chr2	165607783	165607805	GGTGAGTAGGGCAGAGAGG	-	chr2	165607801	165608111	15	common
chr2	165617648	165617670	CCAAGGCGACAGGGATGAG	-	chr2	165617199	165617767	15	common
chr2	165651627	165651648	GCGGGAGGGAGCAGCAGG	+	chr2	165651400	165651744	15	common
chr2	166010149	166010172	CAGCACTTGGGAGGCGGAGC	-	chr2	166009672	166010202	10	common
chr2	167504195	167504218	AGATGAGGGCTGGAGAGAGA	+	chr2	167504181	167504326	13	common
chr2	167510846	167510869	AGGCAAGTTTCACAGACAGC	+	chr2	167510710	167510893	15	common
chr2	167812412	167812435	GTTGCTGAGAAATGAGGCAT	-	chr2	167812028	167812509	15	common
chr2	167835618	167835641	GTCCTGGGCCGGCCAGGAGG	-	chr2	167835551	167835698	15	common
chr2	168030979	168031002	GGGGGCGCATTCCCTGCACT	-	chr2	168030806	168031196	15	common
chr2	168093677	168093700	CTGCAGATTGCATGAGTGTT	-	chr2	168093558	168094038	11	common
chr2	168240700	168240723	CCTGCATTTAGGGGTGATTG	+	chr2	168240436	168240900	11	common
chr2	168485887	168485910	GGGGGCAAAGGGCTAGGAGG	+	chr2	168485889	168486162	13	common
chr2	170092013	170092036	GTGCCTTGGGAGGCCAGAAG	-	chr2	170091894	170092201	11	common
chr2	172584155	172584176	GGCTGTGCTTGGGAGTGG	-	chr2	172584028	172584353	11	common
chr2	172984916	172984940	CGGGATGTGTGAGGGACCGGA	+	chr2	172984807	172985155	15	common
chr2	172990052	172990075	CTGGAACCTGAGAGACCTGG	-	chr2	172989890	172990133	11	common
chr2	173055222	173055244	GTGGCCACTAGGCGGTGCT	+	chr2	173055055	173055639	15	common
chr2	173055222	173055245	GTGGCCACTAGGCGGTGCTG	+	chr2	173055055	173055639	15	common
[truncated: 1,040 more rows]
